# Supplementary material for: Modified Chaishao Liujunzi Decoction inhibits bile acid-induced gastric intestinal metaplasia: from network prediction to experimental verification
Source: Aging (Albany NY). 2023 Dec 10;15(23):13998–4018. doi: 10.18632/aging.205285 (PMC10756100; doi:10.18632/aging.205285)
Supplement: Supplementary Table 3 [file aging-15-205285-s003.xlsx]

## Sheet: Remove the probability value of
Supplementary Table 3. 815 target proteins corresponding to active compounds of MCLD were predicted.
Medicine	MOL ID	Target	Common name	Uniprot ID	ChEMBL ID	Target Class	Probability*	Known actives (3D/2D)
Chaihu	MOL001645	Cannabinoid receptor 1	CNR1	P21554	CHEMBL218	Family A G protein-coupled receptor	0.111502	144 / 26
Chaihu	MOL001645	11-beta-hydroxysteroid dehydrogenase 1	HSD11B1	P28845	CHEMBL4235	Enzyme	0.111502	270 / 23
Chaihu	MOL001645	Anandamide amidohydrolase	FAAH	O00519	CHEMBL2243	Enzyme	0.111502	192 / 15
Chaihu	MOL001645	Cytochrome P450 19A1	CYP19A1	P11511	CHEMBL1978	Cytochrome P450	0.111502	100 / 89
Chaihu	MOL001645	Cytochrome P450 17A1	CYP17A1	P05093	CHEMBL3522	Cytochrome P450	0.111502	46 / 14
Chaihu	MOL001645	Androgen Receptor	AR	P10275	CHEMBL1871	Nuclear receptor	0.111502	61 / 105
Chaihu	MOL001645	Cannabinoid receptor 2	CNR2	P34972	CHEMBL253	Family A G protein-coupled receptor	0.111502	108 / 6
Chaihu	MOL001645	11-beta-hydroxysteroid dehydrogenase 2	HSD11B2	P80365	CHEMBL3746	Enzyme	0.111502	6 / 8
Chaihu	MOL001645	Induced myeloid leukemia cell differentiation protein Mcl-1	MCL1	Q07820	CHEMBL4361	Other cytosolic protein	0.111502	22 / 0
Chaihu	MOL001645	Apoptosis regulator Bcl-2	BCL2	P10415	CHEMBL4860	Other ion channel	0.111502	21 / 0
Chaihu	MOL001645	Prostaglandin E synthase	PTGES	O14684	CHEMBL5658	Enzyme	0.111502	21 / 12
Chaihu	MOL001645	Protein-tyrosine phosphatase 1B	PTPN1	P18031	CHEMBL335	Phosphatase	0.111502	31 / 63
Chaihu	MOL001645	Proteinase-activated receptor 1	F2R	P25116	CHEMBL3974	Family A G protein-coupled receptor	0.111502	108 / 0
Chaihu	MOL001645	Taste receptor type 2 member 31	TAS2R31	P59538	CHEMBL2034804	Taste family G protein-coupled receptor	0.111502	0 / 1
Chaihu	MOL001645	5-lipoxygenase activating protein	ALOX5AP	P20292	CHEMBL4550	Other cytosolic protein	0.111502	519 / 0
Chaihu	MOL001645	Serine/threonine-protein kinase Aurora-B	AURKB	Q96GD4	CHEMBL2185	Kinase	0.111502	72 / 0
Chaihu	MOL001645	Tyrosine-protein kinase JAK2	JAK2	O60674	CHEMBL2971	Kinase	0.111502	30 / 0
Chaihu	MOL001645	Rho-associated protein kinase 2	ROCK2	O75116	CHEMBL2973	Kinase	0.111502	110 / 0
Chaihu	MOL001645	Glutamate NMDA receptor; GRIN1/GRIN2B	GRIN1 GRIN2B	Q05586 Q13224	CHEMBL1907603	Ligand-gated ion channel	0.111502	20 / 0
Chaihu	MOL001645	Carbonic anhydrase XIV	CA14	Q9ULX7	CHEMBL3510	Lyase	0.111502	32 / 0
Chaihu	MOL001645	Tankyrase-1	TNKS	O95271	CHEMBL6164	Enzyme	0.111502	18 / 0
Chaihu	MOL001645	Progesterone receptor	PGR	P06401	CHEMBL208	Nuclear receptor	0.111502	69 / 41
Chaihu	MOL001645	C-X-C chemokine receptor type 3	CXCR3	P49682	CHEMBL4441	Family A G protein-coupled receptor	0.111502	23 / 0
Chaihu	MOL001645	Sodium channel protein type IX alpha subunit	SCN9A	Q15858	CHEMBL4296	Voltage-gated ion channel	0.111502	31 / 0
Chaihu	MOL001645	Ephrin receptor	EPHB4	P54760	CHEMBL5147	Kinase	0.111502	16 / 0
Chaihu	MOL001645	Mineralocorticoid receptor	NR3C2	P08235	CHEMBL1994	Nuclear receptor	0.111502	36 / 16
Chaihu	MOL001645	Glutaminyl-peptide cyclotransferase	QPCT	Q16769	CHEMBL4508	Enzyme	0.111502	29 / 0
Chaihu	MOL001645	Rho-associated protein kinase 1	ROCK1	Q13464	CHEMBL3231	Kinase	0.111502	47 / 0
Chaihu	MOL001645	HMG-CoA reductase (by homology)	HMGCR	P04035	CHEMBL402	Oxidoreductase	0.111502	0 / 92
Chaihu	MOL001645	15-hydroxyprostaglandin dehydrogenase [NAD+]	HPGD	P15428	CHEMBL1293255	Enzyme	0.111502	52 / 0
Chaihu	MOL001645	Corticotropin releasing factor receptor 1	CRHR1	P34998	CHEMBL1800	Family B G protein-coupled receptor	0.111502	52 / 0
Chaihu	MOL001645	Histamine H2 receptor	HRH2	P25021	CHEMBL1941	Family A G protein-coupled receptor	0.111502	10 / 0
Chaihu	MOL001645	Acyl coenzyme A:cholesterol acyltransferase 1	SOAT1	P35610	CHEMBL2782	Enzyme	0.111502	26 / 0
Chaihu	MOL001645	C5a anaphylatoxin chemotactic receptor	C5AR1	P21730	CHEMBL2373	Family A G protein-coupled receptor	0.111502	15 / 0
Chaihu	MOL001645	Histamine H3 receptor	HRH3	Q9Y5N1	CHEMBL264	Family A G protein-coupled receptor	0.111502	71 / 0
Chaihu	MOL001645	Histamine H4 receptor	HRH4	Q9H3N8	CHEMBL3759	Family A G protein-coupled receptor	0.111502	39 / 0
Chaihu	MOL001645	Glucagon receptor	GCGR	P47871	CHEMBL1985	Family B G protein-coupled receptor	0.111502	18 / 0
Chaihu	MOL001645	MAP kinase p38 alpha	MAPK14	Q16539	CHEMBL260	Kinase	0.111502	152 / 0
Chaihu	MOL001645	Plasma retinol-binding protein	RBP4	P02753	CHEMBL3100	Secreted protein	0.111502	5 / 0
Chaihu	MOL001645	Cytochrome P450 11B1	CYP11B1	P15538	CHEMBL1908	Cytochrome P450	0.111502	46 / 0
Chaihu	MOL001645	Cytochrome P450 11B2	CYP11B2	P19099	CHEMBL2722	Cytochrome P450	0.111502	43 / 0
Chaihu	MOL001645	Monoglyceride lipase	MGLL	Q99685	CHEMBL4191	Enzyme	0.111502	57 / 0
Chaihu	MOL001645	Neuropeptide Y receptor type 5	NPY5R	Q15761	CHEMBL4561	Family A G protein-coupled receptor	0.111502	93 / 0
Chaihu	MOL001645	Acetyl-CoA carboxylase 2	ACACB	O00763	CHEMBL4829	Ligase	0.111502	238 / 0
Chaihu	MOL001645	Poly [ADP-ribose] polymerase 2	PARP2	Q9UGN5	CHEMBL5366	Enzyme	0.111502	2 / 0
Chaihu	MOL001645	Tyrosine-protein kinase ABL	ABL1	P00519	CHEMBL1862	Kinase	0.111502	58 / 0
Chaihu	MOL001645	Tyrosine-protein kinase YES	YES1	P07947	CHEMBL2073	Kinase	0.111502	3 / 0
Chaihu	MOL001645	Monoacylglycerol lipase ABHD6 (by homology)	ABHD6	Q9BV23	CHEMBL2189127	Enzyme	0.111502	16 / 0
Chaihu	MOL001645	Tyrosine-protein kinase LCK	LCK	P06239	CHEMBL258	Kinase	0.111502	29 / 0
Chaihu	MOL001645	Tyrosine-protein kinase SRC	SRC	P12931	CHEMBL267	Kinase	0.111502	61 / 0
Chaihu	MOL001645	Diacylglycerol O-acyltransferase 1	DGAT1	O75907	CHEMBL6009	Enzyme	0.111502	8 / 0
Chaihu	MOL001645	Cathepsin K	CTSK	P43235	CHEMBL268	Protease	0.111502	72 / 0
Chaihu	MOL001645	Cathepsin S	CTSS	P25774	CHEMBL2954	Protease	0.111502	53 / 0
Chaihu	MOL001645	Glucocorticoid receptor	NR3C1	P04150	CHEMBL2034	Nuclear receptor	0.111502	94 / 18
Chaihu	MOL001645	Bromodomain-containing protein 4	BRD4	O60885	CHEMBL1163125	Reader	0.111502	24 / 0
Chaihu	MOL001645	Bromodomain-containing protein 2	BRD2	P25440	CHEMBL1293289	Reader	0.111502	12 / 0
Chaihu	MOL001645	Bromodomain-containing protein 3	BRD3	Q15059	CHEMBL1795186	Reader	0.111502	11 / 0
Chaihu	MOL001645	Retinoic acid receptor alpha	RARA	P10276	CHEMBL2055	Nuclear receptor	0.111502	4 / 0
Chaihu	MOL001645	Aldo-keto reductase family 1 member C1	AKR1C1	Q04828	CHEMBL5905	Enzyme	0.111502	0 / 1
Chaihu	MOL001645	Estradiol 17-beta-dehydrogenase 2	HSD17B2	P37059	CHEMBL2789	Enzyme	0.111502	33 / 2
Chaihu	MOL001645	Fatty acid binding protein adipocyte	FABP4	P15090	CHEMBL2083	Fatty acid binding protein family	0.111502	0 / 3
Chaihu	MOL001645	Fatty acid binding protein muscle	FABP3	P05413	CHEMBL3344	Fatty acid binding protein family	0.111502	0 / 4
Chaihu	MOL001645	Peroxisome proliferator-activated receptor delta	PPARD	Q03181	CHEMBL3979	Nuclear receptor	0.111502	0 / 9
Chaihu	MOL001645	Hexokinase type IV	GCK	P35557	CHEMBL3820	Enzyme	0.111502	12 / 0
Chaihu	MOL001645	Isocitrate dehydrogenase [NADP] cytoplasmic	IDH1	O75874	CHEMBL2007625	Enzyme	0.111502	40 / 0
Chaihu	MOL001645	Nicotinamide phosphoribosyltransferase	NAMPT	P43490	CHEMBL1744525	Enzyme	0.111502	34 / 0
Chaihu	MOL001645	Sodium/glucose cotransporter 1	SLC5A1	P13866	CHEMBL4979	Electrochemical transporter	0.111502	102 / 0
Chaihu	MOL001645	Nucleotide-binding oligomerization domain-containing protein 1	NOD1	Q9Y239	CHEMBL1293222	Unclassified protein	0.111502	8 / 0
Chaihu	MOL001645	Nucleotide-binding oligomerization domain-containing protein 2	NOD2	Q9HC29	CHEMBL1293266	Unclassified protein	0.111502	8 / 0
Chaihu	MOL001645	Serine/threonine-protein kinase PIM1	PIM1	P11309	CHEMBL2147	Kinase	0.111502	34 / 0
Chaihu	MOL001645	GABA receptor alpha-5 subunit (by homology)	GABRA5	P31644	CHEMBL5112	Ligand-gated ion channel	0.111502	4 / 0
Chaihu	MOL001645	GABA receptor alpha-1 subunit (by homology)	GABRA1	P14867	CHEMBL1962	Ligand-gated ion channel	0.111502	5 / 0
Chaihu	MOL001645	Vasopressin V1a receptor	AVPR1A	P37288	CHEMBL1889	Family A G protein-coupled receptor	0.111502	47 / 0
Chaihu	MOL001645	Carbonic anhydrase II	CA2	P00918	CHEMBL205	Lyase	0.111502	212 / 0
Chaihu	MOL001645	Translocator protein (by homology)	TSPO	P30536	CHEMBL5742	Membrane receptor	0.111502	27 / 0
Chaihu	MOL002776	Aldose reductase (by homology)	AKR1B1	P15121	CHEMBL1900	Enzyme	0.131435	14 / 69
Chaihu	MOL002776	Adenosine A1 receptor (by homology)	ADORA1	P30542	CHEMBL226	Family A G protein-coupled receptor	0.123138	42 / 15
Chaihu	MOL002776	TNF-alpha	TNF	P01375	CHEMBL1825	Secreted protein	0.114839	0 / 3
Chaihu	MOL002776	Interleukin-2	IL2	P60568	CHEMBL5880	Secreted protein	0.114839	0 / 4
Chaihu	MOL002776	Xanthine dehydrogenase	XDH	P47989	CHEMBL1929	Oxidoreductase	0.106543	0 / 19
Chaihu	MOL002776	Cyclooxygenase-2	PTGS2	P35354	CHEMBL230	Oxidoreductase	0.106543	0 / 5
Chaihu	MOL002776	Ribosomal protein S6 kinase alpha 3	RPS6KA3	P51812	CHEMBL2345	Kinase	0.106543	0 / 19
Chaihu	MOL002776	Epidermal growth factor receptor erbB1	EGFR	P00533	CHEMBL203	Kinase	0.106543	0 / 21
Chaihu	MOL002776	Acetylcholinesterase	ACHE	P22303	CHEMBL220	Hydrolase	0.106543	0 / 28
Chaihu	MOL002776	Quinone reductase 2	NQO2	P16083	CHEMBL3959	Enzyme	0.106543	0 / 1
Chaihu	MOL002776	Neuromedin-U receptor 2	NMUR2	Q9GZQ4	CHEMBL1075144	Family A G protein-coupled receptor	0.106543	0 / 1
Chaihu	MOL002776	Alpha-2a adrenergic receptor	ADRA2A	P08913	CHEMBL1867	Family A G protein-coupled receptor	0.106543	0 / 1
Chaihu	MOL002776	Adrenergic receptor alpha-2	ADRA2C	P18825	CHEMBL1916	Family A G protein-coupled receptor	0.106543	0 / 2
Chaihu	MOL002776	NADPH oxidase 4	NOX4	Q9NPH5	CHEMBL1250375	Enzyme	0.106543	0 / 7
Chaihu	MOL002776	Aldehyde dehydrogenase	ALDH2	P05091	CHEMBL1935	Oxidoreductase	0.106543	0 / 24
Chaihu	MOL000449	Cytochrome P450 51 (by homology)	CYP51A1	Q16850	CHEMBL3849	Cytochrome P450	0.664324	6 / 2
Chaihu	MOL000449	HMG-CoA reductase	HMGCR	P04035	CHEMBL402	Oxidoreductase	0.664324	79 / 7
Chaihu	MOL000449	LXR-alpha	NR1H3	Q13133	CHEMBL2808	Nuclear receptor	0.630968	18 / 20
Chaihu	MOL000449	Niemann-Pick C1-like protein 1	NPC1L1	Q9UHC9	CHEMBL2027	Other membrane protein	0.589276	8 / 13
Chaihu	MOL000449	Cytochrome P450 17A1	CYP17A1	P05093	CHEMBL3522	Cytochrome P450	0.506041	53 / 50
Chaihu	MOL000449	Androgen Receptor	AR	P10275	CHEMBL1871	Nuclear receptor	0.497677	40 / 102
Chaihu	MOL000449	Sterol regulatory element-binding protein 2	SREBF2	Q12772	CHEMBL1795166	Unclassified protein	0.456018	0 / 1
Chaihu	MOL000449	Cytochrome P450 19A1	CYP19A1	P11511	CHEMBL1978	Cytochrome P450	0.431039	19 / 161
Chaihu	MOL000449	Nuclear receptor ROR-gamma	RORC	P51449	CHEMBL1741186	Nuclear receptor	0.356071	10 / 9
Chaihu	MOL000449	Estrogen receptor alpha	ESR1	P03372	CHEMBL206	Nuclear receptor	0.314405	10 / 39
Chaihu	MOL000449	Estrogen receptor beta	ESR2	Q92731	CHEMBL242	Nuclear receptor	0.314405	8 / 47
Chaihu	MOL000449	Testis-specific androgen-binding protein	SHBG	P04278	CHEMBL3305	Secreted protein	0.239432	1 / 48
Chaihu	MOL000449	Norepinephrine transporter	SLC6A2	P23975	CHEMBL222	Electrochemical transporter	0.131156	6 / 2
Chaihu	MOL000449	Corticosteroid binding globulin	SERPINA6	P08185	CHEMBL2421	Secreted protein	0.114495	0 / 18
Chaihu	MOL000449	Protein-tyrosine phosphatase 1B	PTPN1	P18031	CHEMBL335	Phosphatase	0.114495	17 / 47
Chaihu	MOL000449	Muscarinic acetylcholine receptor M2	CHRM2	P08172	CHEMBL211	Family A G protein-coupled receptor	0.114495	12 / 1
Chaihu	MOL000449	Nuclear receptor ROR-alpha	RORA	P35398	CHEMBL5868	Nuclear receptor	0.114495	3 / 3
Chaihu	MOL000449	Butyrylcholinesterase	BCHE	P06276	CHEMBL1914	Hydrolase	0.114495	5 / 2
Chaihu	MOL000449	Serotonin transporter	SLC6A4	P31645	CHEMBL228	Electrochemical transporter	0.106166	22 / 5
Chaihu	MOL000449	Acetylcholinesterase	ACHE	P22303	CHEMBL220	Hydrolase	0.106166	4 / 1
Chaihu	MOL000449	Cytochrome P450 2C19	CYP2C19	P33261	CHEMBL3622	Cytochrome P450	0.106166	2 / 3
Chaihu	MOL000449	Glucose-6-phosphate 1-dehydrogenase	G6PD	P11413	CHEMBL5347	Enzyme	0.106166	4 / 2
Chaihu	MOL000449	Dual specificity phosphatase Cdc25A	CDC25A	P30304	CHEMBL3775	Phosphatase	0.106166	9 / 11
Chaihu	MOL000449	Carboxylesterase 2	CES2	O00748	CHEMBL3180	Enzyme	0.106166	5 / 10
Chaihu	MOL000449	LXR-beta	NR1H2	P55055	CHEMBL4093	Nuclear receptor	0.106166	4 / 1
Chaihu	MOL000449	Vitamin D receptor	VDR	P11473	CHEMBL1977	Nuclear receptor	0.106166	12 / 49
Chaihu	MOL000449	Prostanoid EP1 receptor (by homology)	PTGER1	P34995	CHEMBL1811	Family A G protein-coupled receptor	0.106166	0 / 9
Chaihu	MOL000449	Prostanoid EP2 receptor (by homology)	PTGER2	P43116	CHEMBL1881	Family A G protein-coupled receptor	0.106166	0 / 20
Chaihu	MOL000449	11-beta-hydroxysteroid dehydrogenase 1	HSD11B1	P28845	CHEMBL4235	Enzyme	0.106166	129 / 23
Chaihu	MOL000449	Peroxisome proliferator-activated receptor delta	PPARD	Q03181	CHEMBL3979	Nuclear receptor	0.106166	0 / 8
Chaihu	MOL000449	Glycine receptor subunit alpha-1	GLRA1	P23415	CHEMBL5845	Ligand-gated ion channel	0.106166	1 / 1
Chaihu	MOL000449	Squalene monooxygenase	SQLE	Q14534	CHEMBL3592	Enzyme	0.106166	0 / 4
Chaihu	MOL000449	Nuclear receptor subfamily 1 group I member 3 (by homology)	NR1I3	Q14994	CHEMBL5503	Nuclear receptor	0.106166	2 / 3
Chaihu	MOL000449	Anti-estrogen binding site (AEBS) (by homology)	DHCR7	Q9UBM7	CHEMBL2169735	Enzyme	0.106166	3 / 5
Chaihu	MOL000449	Protein-tyrosine phosphatase 1C	PTPN6	P29350	CHEMBL3166	Phosphatase	0.106166	0 / 1
Chaihu	MOL000449	Glucocorticoid receptor	NR3C1	P04150	CHEMBL2034	Nuclear receptor	0.106166	78 / 25
Chaihu	MOL000449	Thromboxane-A synthase	TBXAS1	P24557	CHEMBL1835	Cytochrome P450	0.106166	3 / 1
Chaihu	MOL000449	Glucagon receptor	GCGR	P47871	CHEMBL1985	Family B G protein-coupled receptor	0.106166	22 / 0
Chaihu	MOL000449	Nitric oxide synthase, inducible (by homology)	NOS2	P35228	CHEMBL4481	Enzyme	0.106166	2 / 16
Chaihu	MOL000449	11-beta-hydroxysteroid dehydrogenase 2	HSD11B2	P80365	CHEMBL3746	Enzyme	0.106166	9 / 8
Chaihu	MOL000449	DNA polymerase beta (by homology)	POLB	P06746	CHEMBL2392	Enzyme	0.106166	0 / 6
Chaihu	MOL000354	Xanthine dehydrogenase	XDH	P47989	CHEMBL1929	Oxidoreductase	1	14 / 21
Chaihu	MOL000354	Carbonic anhydrase II	CA2	P00918	CHEMBL205	Lyase	1	16 / 16
Chaihu	MOL000354	Carbonic anhydrase VII	CA7	P43166	CHEMBL2326	Lyase	1	9 / 14
Chaihu	MOL000354	Carbonic anhydrase XII	CA12	O43570	CHEMBL3242	Lyase	1	10 / 17
Chaihu	MOL000354	Carbonic anhydrase IV	CA4	P22748	CHEMBL3729	Lyase	1	9 / 13
Chaihu	MOL000354	Cytochrome P450 1B1	CYP1B1	Q16678	CHEMBL4878	Cytochrome P450	1	12 / 46
Chaihu	MOL000354	Multidrug resistance-associated protein 1	ABCC1	P33527	CHEMBL3004	Primary active transporter	0.443225	7 / 11
Chaihu	MOL000354	NADPH oxidase 4	NOX4	Q9NPH5	CHEMBL1250375	Enzyme	0.40977	6 / 8
Chaihu	MOL000354	Aldose reductase	AKR1B1	P15121	CHEMBL1900	Enzyme	0.40157	22 / 72
Chaihu	MOL000354	ATP-binding cassette sub-family G member 2	ABCG2	Q9UNQ0	CHEMBL5393	Primary active transporter	0.284878	6 / 50
Chaihu	MOL000354	Acetylcholinesterase	ACHE	P22303	CHEMBL220	Hydrolase	0.284878	4 / 32
Chaihu	MOL000354	Arachidonate 15-lipoxygenase	ALOX15	P16050	CHEMBL2903	Enzyme	0.284878	6 / 7
Chaihu	MOL000354	Arachidonate 12-lipoxygenase	ALOX12	P18054	CHEMBL3687	Enzyme	0.284878	9 / 9
Chaihu	MOL000354	Insulin-like growth factor I receptor	IGF1R	P08069	CHEMBL1957	Kinase	0.268235	3 / 3
Chaihu	MOL000354	Epidermal growth factor receptor erbB1	EGFR	P00533	CHEMBL203	Kinase	0.268235	5 / 28
Chaihu	MOL000354	Vasopressin V2 receptor	AVPR2	P30518	CHEMBL1790	Family A G protein-coupled receptor	0.25991	2 / 1
Chaihu	MOL000354	Monoamine oxidase A	MAOA	P21397	CHEMBL1951	Oxidoreductase	0.25991	5 / 12
Chaihu	MOL000354	Tyrosine-protein kinase receptor FLT3	FLT3	P36888	CHEMBL1974	Kinase	0.25991	6 / 7
Chaihu	MOL000354	Cytochrome P450 19A1	CYP19A1	P11511	CHEMBL1978	Cytochrome P450	0.25991	7 / 18
Chaihu	MOL000354	Thrombin	F2	P00734	CHEMBL204	Protease	0.25991	16 / 2
Chaihu	MOL000354	Serine/threonine-protein kinase PIM1	PIM1	P11309	CHEMBL2147	Kinase	0.25991	7 / 7
Chaihu	MOL000354	Arachidonate 5-lipoxygenase	ALOX5	P09917	CHEMBL215	Oxidoreductase	0.25991	5 / 48
Chaihu	MOL000354	Serine/threonine-protein kinase Aurora-B	AURKB	Q96GD4	CHEMBL2185	Kinase	0.25991	3 / 4
Chaihu	MOL000354	Dopamine D4 receptor	DRD4	P21917	CHEMBL219	Family A G protein-coupled receptor	0.25991	1 / 1
Chaihu	MOL000354	Adenosine A1 receptor (by homology)	ADORA1	P30542	CHEMBL226	Family A G protein-coupled receptor	0.25991	7 / 23
Chaihu	MOL000354	Glyoxalase I	GLO1	Q04760	CHEMBL2424	Enzyme	0.25991	3 / 4
Chaihu	MOL000354	Myeloperoxidase	MPO	P05164	CHEMBL2439	Enzyme	0.25991	1 / 1
Chaihu	MOL000354	PI3-kinase p85-alpha subunit	PIK3R1	P27986	CHEMBL2506	Enzyme	0.25991	1 / 1
Chaihu	MOL000354	Adenosine A2a receptor (by homology)	ADORA2A	P29274	CHEMBL251	Family A G protein-coupled receptor	0.25991	6 / 11
Chaihu	MOL000354	Death-associated protein kinase 1	DAPK1	P53355	CHEMBL2558	Kinase	0.25991	2 / 2
Chaihu	MOL000354	Liver glycogen phosphorylase	PYGL	P06737	CHEMBL2568	Enzyme	0.25991	1 / 1
Chaihu	MOL000354	Carbonic anhydrase I	CA1	P00915	CHEMBL261	Lyase	0.25991	5 / 6
Chaihu	MOL000354	Glycogen synthase kinase-3 beta	GSK3B	P49841	CHEMBL262	Kinase	0.25991	5 / 6
Chaihu	MOL000354	Tyrosine-protein kinase SRC	SRC	P12931	CHEMBL267	Kinase	0.25991	1 / 10
Chaihu	MOL000354	Focal adhesion kinase 1	PTK2	Q05397	CHEMBL2695	Kinase	0.25991	1 / 2
Chaihu	MOL000354	Estradiol 17-beta-dehydrogenase 2	HSD17B2	P37059	CHEMBL2789	Enzyme	0.25991	11 / 3
Chaihu	MOL000354	Vascular endothelial growth factor receptor 2	KDR	P35968	CHEMBL279	Kinase	0.25991	2 / 3
Chaihu	MOL000354	Matrix metalloproteinase 13	MMP13	P45452	CHEMBL280	Protease	0.25991	1 / 1
Chaihu	MOL000354	Matrix metalloproteinase 3	MMP3	P08254	CHEMBL283	Protease	0.25991	1 / 1
Chaihu	MOL000354	Carbonic anhydrase III	CA3	P07451	CHEMBL2885	Lyase	0.25991	1 / 1
Chaihu	MOL000354	Serine/threonine-protein kinase PLK1	PLK1	P53350	CHEMBL3024	Kinase	0.25991	2 / 3
Chaihu	MOL000354	Carbonic anhydrase VI	CA6	P23280	CHEMBL3025	Lyase	0.25991	2 / 1
Chaihu	MOL000354	Cyclin-dependent kinase 1	CDK1	P06493	CHEMBL308	Kinase	0.25991	4 / 12
Chaihu	MOL000354	Matrix metalloproteinase 9	MMP9	P14780	CHEMBL321	Protease	0.25991	3 / 2
Chaihu	MOL000354	Matrix metalloproteinase 2	MMP2	P08253	CHEMBL333	Protease	0.25991	3 / 2
Chaihu	MOL000354	Protein kinase N1	PKN1	Q16512	CHEMBL3384	Kinase	0.25991	1 / 3
Chaihu	MOL000354	Carbonic anhydrase XIV	CA14	Q9ULX7	CHEMBL3510	Lyase	0.25991	1 / 1
Chaihu	MOL000354	Carbonic anhydrase IX	CA9	Q16790	CHEMBL3594	Lyase	0.25991	6 / 5
Chaihu	MOL000354	Casein kinase II alpha	CSNK2A1	P68400	CHEMBL3629	Kinase	0.25991	3 / 2
Chaihu	MOL000354	Hepatocyte growth factor receptor	MET	P08581	CHEMBL3717	Kinase	0.25991	4 / 4
Chaihu	MOL000354	Serine/threonine-protein kinase NEK2	NEK2	P51955	CHEMBL3835	Kinase	0.25991	1 / 2
Chaihu	MOL000354	Interleukin-8 receptor A	CXCR1	P25024	CHEMBL4029	Family A G protein-coupled receptor	0.25991	1 / 1
Chaihu	MOL000354	CaM kinase II beta	CAMK2B	Q13554	CHEMBL4121	Kinase	0.25991	1 / 2
Chaihu	MOL000354	ALK tyrosine kinase receptor	ALK	Q9UM73	CHEMBL4247	Kinase	0.25991	2 / 4
Chaihu	MOL000354	Serine/threonine-protein kinase AKT	AKT1	P31749	CHEMBL4282	Kinase	0.25991	1 / 4
Chaihu	MOL000354	P-glycoprotein 1	ABCB1	P08183	CHEMBL4302	Primary active transporter	0.25991	12 / 47
Chaihu	MOL000354	Serine/threonine-protein kinase NEK6	NEK6	Q9HC98	CHEMBL4309	Kinase	0.25991	1 / 2
Chaihu	MOL000354	Phospholipase A2 group 1B	PLA2G1B	P04054	CHEMBL4426	Enzyme	0.25991	1 / 1
Chaihu	MOL000354	Carbonic anhydrase VA	CA5A	P35218	CHEMBL4789	Lyase	0.25991	1 / 1
Chaihu	MOL000354	Beta-secretase 1	BACE1	P56817	CHEMBL4822	Protease	0.25991	15 / 17
Chaihu	MOL000354	Tyrosine-protein kinase receptor UFO	AXL	P30530	CHEMBL4895	Kinase	0.25991	2 / 4
Chaihu	MOL000354	NUAK family SNF1-like kinase 1	NUAK1	O60285	CHEMBL5784	Kinase	0.25991	1 / 2
Chaihu	MOL000354	Aldo-keto reductase family 1 member C2 (by homology)	AKR1C2	P52895	CHEMBL5847	Enzyme	0.25991	1 / 1
Chaihu	MOL000354	Aldo-keto reductase family 1 member C1 (by homology)	AKR1C1	Q04828	CHEMBL5905	Enzyme	0.25991	1 / 1
Chaihu	MOL000354	Aldo-keto-reductase family 1 member C3 (by homology)	AKR1C3	P42330	CHEMBL4681	Enzyme	0.25991	1 / 1
Chaihu	MOL000354	Aldo-keto reductase family 1 member C4 (by homology)	AKR1C4	P17516	CHEMBL4999	Enzyme	0.25991	1 / 1
Chaihu	MOL000354	Carbonic anhydrase XIII (by homology)	CA13	Q8N1Q1	CHEMBL3912	Lyase	0.25991	1 / 1
Chaihu	MOL000354	Aldehyde reductase (by homology)	AKR1A1	P14550	CHEMBL2246	Enzyme	0.25991	1 / 1
Chaihu	MOL000354	G-protein coupled receptor 35	GPR35	Q9HC97	CHEMBL1293267	Family A G protein-coupled receptor	0.243267	2 / 4
Chaihu	MOL000354	Microtubule-associated protein tau	MAPT	P10636	CHEMBL1293224	Unclassified protein	0.201602	1 / 1
Chaihu	MOL000354	Lysine-specific demethylase 4D-like	KDM4E	B2RXH2	CHEMBL1293226	Eraser	0.201602	2 / 2
Chaihu	MOL000354	DNA topoisomerase II alpha	TOP2A	P11388	CHEMBL1806	Isomerase	0.201602	1 / 1
Chaihu	MOL000354	Insulin receptor	INSR	P06213	CHEMBL1981	Kinase	0.201602	1 / 1
Chaihu	MOL000354	Myosin light chain kinase, smooth muscle	MYLK	Q15746	CHEMBL2428	Kinase	0.201602	1 / 1
Chaihu	MOL000354	Tyrosine-protein kinase SYK	SYK	P43405	CHEMBL2599	Kinase	0.201602	3 / 3
Chaihu	MOL000354	PI3-kinase p110-gamma subunit	PIK3CG	P48736	CHEMBL3267	Enzyme	0.201602	3 / 1
Chaihu	MOL000354	DNA-(apurinic or apyrimidinic site) lyase	APEX1	P27695	CHEMBL5619	Enzyme	0.201602	1 / 1
Chaihu	MOL000354	Cyclin-dependent kinase 5/CDK5 activator 1	CDK5R1 CDK5	Q15078 Q00535	CHEMBL1907600	Kinase	0.19327	5 / 18
Chaihu	MOL000354	Cyclin-dependent kinase 1/cyclin B	CCNB3 CDK1 CCNB1 CCNB2	Q8WWL7 P06493 P14635 O95067	CHEMBL2094127	Other cytosolic protein	0.19327	4 / 6
Chaihu	MOL000354	Cyclin-dependent kinase 6	CDK6	Q00534	CHEMBL2508	Kinase	0.19327	3 / 4
Chaihu	MOL000354	Cyclin-dependent kinase 2	CDK2	P24941	CHEMBL301	Kinase	0.19327	2 / 16
Chaihu	MOL000354	Arginase-1 (by homology)	ARG1	P05089	CHEMBL1075097	Enzyme	0.19327	2 / 2
Chaihu	MOL000354	Beta amyloid A4 protein	APP	P05067	CHEMBL2487	Membrane receptor	0.18493	2 / 12
Chaihu	MOL000354	Induced myeloid leukemia cell differentiation protein Mcl-1	MCL1	Q07820	CHEMBL4361	Other cytosolic protein	0.134939	5 / 4
Chaihu	MOL000354	Telomerase reverse transcriptase	TERT	O14746	CHEMBL2916	Enzyme	0.134939	9 / 22
Chaihu	MOL000354	Tyrosinase	TYR	P14679	CHEMBL1973	Oxidoreductase	0.12661	2 / 2
Chaihu	MOL000354	Estradiol 17-beta-dehydrogenase 1	HSD17B1	P14061	CHEMBL3181	Enzyme	0.12661	11 / 4
Chaihu	MOL000354	Aryl hydrocarbon receptor	AHR	P35869	CHEMBL3201	Transcription factor	0.12661	1 / 1
Chaihu	MOL000354	Estrogen-related receptor alpha	ESRRA	P11474	CHEMBL3429	Nuclear receptor	0.12661	2 / 2
Chaihu	MOL000354	Receptor-type tyrosine-protein phosphatase S	PTPRS	Q13332	CHEMBL2396508	Phosphatase	0.12661	4 / 8
Chaihu	MOL000354	Plasminogen	PLG	P00747	CHEMBL1801	Protease	0.12661	6 / 2
Chaihu	MOL000354	Estrogen receptor beta	ESR2	Q92731	CHEMBL242	Nuclear receptor	0.118277	69 / 22
Chaihu	MOL000354	DNA-3-methyladenine glycosylase	MPG	P29372	CHEMBL3396943	Enzyme	0.118277	1 / 1
Chaihu	MOL000354	Solute carrier family 22 member 12	SLC22A12	Q96S37	CHEMBL6120	Electrochemical transporter	0.118277	6 / 1
Chaihu	MOL000354	Poly [ADP-ribose] polymerase-1	PARP1	P09874	CHEMBL3105	Enzyme	0.109946	3 / 9
Chaihu	MOL000354	Transthyretin	TTR	P02766	CHEMBL3194	Secreted protein	0.109946	2 / 3
Chaihu	MOL000354	Matrix metalloproteinase 12	MMP12	P39900	CHEMBL4393	Protease	0.109946	1 / 1
Chaihu	MOL000354	Lymphocyte differentiation antigen CD38	CD38	P28907	CHEMBL4660	Enzyme	0.109946	2 / 3
Chaihu	MOL000354	Aldo-keto reductase family 1 member B10	AKR1B10	O60218	CHEMBL5983	Enzyme	0.109946	2 / 3
Chaihu	MOL000354	Tankyrase-2	TNKS2	Q9H2K2	CHEMBL6154	Enzyme	0.109946	4 / 12
Chaihu	MOL000422	NADPH oxidase 4	NOX4	Q9NPH5	CHEMBL1250375	Enzyme	1	7 / 8
Chaihu	MOL000422	Aldose reductase (by homology)	AKR1B1	P15121	CHEMBL1900	Enzyme	1	18 / 71
Chaihu	MOL000422	Xanthine dehydrogenase	XDH	P47989	CHEMBL1929	Oxidoreductase	1	12 / 20
Chaihu	MOL000422	Tyrosinase	TYR	P14679	CHEMBL1973	Oxidoreductase	1	2 / 3
Chaihu	MOL000422	Tyrosine-protein kinase receptor FLT3	FLT3	P36888	CHEMBL1974	Kinase	1	5 / 7
Chaihu	MOL000422	Carbonic anhydrase II	CA2	P00918	CHEMBL205	Lyase	1	8 / 14
Chaihu	MOL000422	Arachidonate 5-lipoxygenase	ALOX5	P09917	CHEMBL215	Oxidoreductase	1	5 / 47
Chaihu	MOL000422	Carbonic anhydrase VII	CA7	P43166	CHEMBL2326	Lyase	1	8 / 13
Chaihu	MOL000422	Estradiol 17-beta-dehydrogenase 2	HSD17B2	P37059	CHEMBL2789	Enzyme	1	9 / 3
Chaihu	MOL000422	Multidrug resistance-associated protein 1	ABCC1	P33527	CHEMBL3004	Primary active transporter	1	7 / 11
Chaihu	MOL000422	Estradiol 17-beta-dehydrogenase 1	HSD17B1	P14061	CHEMBL3181	Enzyme	1	9 / 4
Chaihu	MOL000422	Aryl hydrocarbon receptor	AHR	P35869	CHEMBL3201	Transcription factor	1	1 / 1
Chaihu	MOL000422	Carbonic anhydrase XII	CA12	O43570	CHEMBL3242	Lyase	1	10 / 17
Chaihu	MOL000422	Estrogen-related receptor alpha	ESRRA	P11474	CHEMBL3429	Nuclear receptor	1	2 / 2
Chaihu	MOL000422	P-glycoprotein 1	ABCB1	P08183	CHEMBL4302	Primary active transporter	1	12 / 48
Chaihu	MOL000422	Cytochrome P450 1B1	CYP1B1	Q16678	CHEMBL4878	Cytochrome P450	1	12 / 46
Chaihu	MOL000422	ATP-binding cassette sub-family G member 2	ABCG2	Q9UNQ0	CHEMBL5393	Primary active transporter	1	6 / 47
Chaihu	MOL000422	Adenosine A1 receptor (by homology)	ADORA1	P30542	CHEMBL226	Family A G protein-coupled receptor	0.795047	6 / 23
Chaihu	MOL000422	Carbonic anhydrase IV	CA4	P22748	CHEMBL3729	Lyase	0.795047	7 / 12
Chaihu	MOL000422	Acetylcholinesterase	ACHE	P22303	CHEMBL220	Hydrolase	0.768469	4 / 26
Chaihu	MOL000422	Monoamine oxidase A	MAOA	P21397	CHEMBL1951	Oxidoreductase	0.65802	5 / 18
Chaihu	MOL000422	Glyoxalase I	GLO1	Q04760	CHEMBL2424	Enzyme	0.65802	3 / 4
Chaihu	MOL000422	Tyrosine-protein kinase SYK	SYK	P43405	CHEMBL2599	Kinase	0.65802	3 / 3
Chaihu	MOL000422	Glycogen synthase kinase-3 beta	GSK3B	P49841	CHEMBL262	Kinase	0.65802	3 / 6
Chaihu	MOL000422	Matrix metalloproteinase 9	MMP9	P14780	CHEMBL321	Protease	0.65802	2 / 2
Chaihu	MOL000422	Matrix metalloproteinase 2	MMP2	P08253	CHEMBL333	Protease	0.65802	2 / 2
Chaihu	MOL000422	Arachidonate 15-lipoxygenase	ALOX15	P16050	CHEMBL2903	Enzyme	0.649781	6 / 8
Chaihu	MOL000422	Arachidonate 12-lipoxygenase	ALOX12	P18054	CHEMBL3687	Enzyme	0.633326	9 / 10
Chaihu	MOL000422	Receptor-type tyrosine-protein phosphatase S	PTPRS	Q13332	CHEMBL2396508	Phosphatase	0.608446	7 / 8
Chaihu	MOL000422	Adenosine A2a receptor (by homology)	ADORA2A	P29274	CHEMBL251	Family A G protein-coupled receptor	0.567302	5 / 11
Chaihu	MOL000422	Cyclin-dependent kinase 5/CDK5 activator 1	CDK5R1 CDK5	Q15078 Q00535	CHEMBL1907600	Kinase	0.517921	6 / 18
Chaihu	MOL000422	Cyclin-dependent kinase 1/cyclin B	CCNB3 CDK1 CCNB1 CCNB2	Q8WWL7 P06493 P14635 O95067	CHEMBL2094127	Other cytosolic protein	0.517921	4 / 11
Chaihu	MOL000422	Arginase-1 (by homology)	ARG1	P05089	CHEMBL1075097	Enzyme	0.517921	2 / 2
Chaihu	MOL000422	G-protein coupled receptor 35	GPR35	Q9HC97	CHEMBL1293267	Family A G protein-coupled receptor	0.50153	2 / 4
Chaihu	MOL000422	Estrogen receptor beta	ESR2	Q92731	CHEMBL242	Nuclear receptor	0.50153	93 / 38
Chaihu	MOL000422	Death-associated protein kinase 1	DAPK1	P53355	CHEMBL2558	Kinase	0.50153	2 / 2
Chaihu	MOL000422	DNA-3-methyladenine glycosylase	MPG	P29372	CHEMBL3396943	Enzyme	0.50153	1 / 1
Chaihu	MOL000422	Solute carrier family 22 member 12	SLC22A12	Q96S37	CHEMBL6120	Electrochemical transporter	0.50153	6 / 1
Chaihu	MOL000422	Transthyretin	TTR	P02766	CHEMBL3194	Secreted protein	0.484896	2 / 3
Chaihu	MOL000422	Aldo-keto reductase family 1 member B10	AKR1B10	O60218	CHEMBL5983	Enzyme	0.484896	2 / 3
Chaihu	MOL000422	Tankyrase-2	TNKS2	Q9H2K2	CHEMBL6154	Enzyme	0.484896	4 / 12
Chaihu	MOL000422	Tankyrase-1	TNKS	O95271	CHEMBL6164	Enzyme	0.484896	4 / 28
Chaihu	MOL000422	Cyclin-dependent kinase 6	CDK6	Q00534	CHEMBL2508	Kinase	0.476836	3 / 4
Chaihu	MOL000422	Cyclin-dependent kinase 2	CDK2	P24941	CHEMBL301	Kinase	0.476836	1 / 17
Chaihu	MOL000422	Cytochrome P450 19A1	CYP19A1	P11511	CHEMBL1978	Cytochrome P450	0.427205	6 / 18
Chaihu	MOL000422	Casein kinase II alpha	CSNK2A1	P68400	CHEMBL3629	Kinase	0.427205	3 / 2
Chaihu	MOL000422	Epidermal growth factor receptor erbB1	EGFR	P00533	CHEMBL203	Kinase	0.402643	7 / 29
Chaihu	MOL000422	Vasopressin V2 receptor	AVPR2	P30518	CHEMBL1790	Family A G protein-coupled receptor	0.402643	1 / 1
Chaihu	MOL000422	Insulin-like growth factor I receptor	IGF1R	P08069	CHEMBL1957	Kinase	0.402643	3 / 3
Chaihu	MOL000422	Thrombin	F2	P00734	CHEMBL204	Protease	0.402643	11 / 3
Chaihu	MOL000422	Serine/threonine-protein kinase PIM1	PIM1	P11309	CHEMBL2147	Kinase	0.402643	8 / 7
Chaihu	MOL000422	Serine/threonine-protein kinase Aurora-B	AURKB	Q96GD4	CHEMBL2185	Kinase	0.402643	3 / 4
Chaihu	MOL000422	Dopamine D4 receptor	DRD4	P21917	CHEMBL219	Family A G protein-coupled receptor	0.402643	1 / 1
Chaihu	MOL000422	Myeloperoxidase	MPO	P05164	CHEMBL2439	Enzyme	0.402643	1 / 1
Chaihu	MOL000422	PI3-kinase p85-alpha subunit	PIK3R1	P27986	CHEMBL2506	Enzyme	0.402643	1 / 1
Chaihu	MOL000422	Liver glycogen phosphorylase	PYGL	P06737	CHEMBL2568	Enzyme	0.402643	1 / 1
Chaihu	MOL000422	Carbonic anhydrase I	CA1	P00915	CHEMBL261	Lyase	0.402643	4 / 5
Chaihu	MOL000422	Tyrosine-protein kinase SRC	SRC	P12931	CHEMBL267	Kinase	0.402643	3 / 10
Chaihu	MOL000422	Focal adhesion kinase 1	PTK2	Q05397	CHEMBL2695	Kinase	0.402643	1 / 2
Chaihu	MOL000422	Vascular endothelial growth factor receptor 2	KDR	P35968	CHEMBL279	Kinase	0.402643	2 / 3
Chaihu	MOL000422	Matrix metalloproteinase 13	MMP13	P45452	CHEMBL280	Protease	0.402643	1 / 1
Chaihu	MOL000422	Matrix metalloproteinase 3	MMP3	P08254	CHEMBL283	Protease	0.402643	1 / 1
Chaihu	MOL000422	Carbonic anhydrase III	CA3	P07451	CHEMBL2885	Lyase	0.402643	1 / 1
Chaihu	MOL000422	Serine/threonine-protein kinase PLK1	PLK1	P53350	CHEMBL3024	Kinase	0.402643	2 / 3
Chaihu	MOL000422	Carbonic anhydrase VI	CA6	P23280	CHEMBL3025	Lyase	0.402643	1 / 1
Chaihu	MOL000422	Cyclin-dependent kinase 1	CDK1	P06493	CHEMBL308	Kinase	0.402643	3 / 13
Chaihu	MOL000422	Protein kinase N1	PKN1	Q16512	CHEMBL3384	Kinase	0.402643	1 / 3
Chaihu	MOL000422	Carbonic anhydrase XIV	CA14	Q9ULX7	CHEMBL3510	Lyase	0.402643	1 / 1
Chaihu	MOL000422	Carbonic anhydrase IX	CA9	Q16790	CHEMBL3594	Lyase	0.402643	3 / 6
Chaihu	MOL000422	Hepatocyte growth factor receptor	MET	P08581	CHEMBL3717	Kinase	0.402643	4 / 4
Chaihu	MOL000422	Serine/threonine-protein kinase NEK2	NEK2	P51955	CHEMBL3835	Kinase	0.402643	1 / 2
Chaihu	MOL000422	Interleukin-8 receptor A	CXCR1	P25024	CHEMBL4029	Family A G protein-coupled receptor	0.402643	1 / 1
Chaihu	MOL000422	CaM kinase II beta	CAMK2B	Q13554	CHEMBL4121	Kinase	0.402643	1 / 2
Chaihu	MOL000422	ALK tyrosine kinase receptor	ALK	Q9UM73	CHEMBL4247	Kinase	0.402643	2 / 4
Chaihu	MOL000422	Serine/threonine-protein kinase AKT	AKT1	P31749	CHEMBL4282	Kinase	0.402643	1 / 4
Chaihu	MOL000422	Serine/threonine-protein kinase NEK6	NEK6	Q9HC98	CHEMBL4309	Kinase	0.402643	1 / 2
Chaihu	MOL000422	Phospholipase A2 group 1B	PLA2G1B	P04054	CHEMBL4426	Enzyme	0.402643	1 / 1
Chaihu	MOL000422	Carbonic anhydrase VA	CA5A	P35218	CHEMBL4789	Lyase	0.402643	1 / 1
Chaihu	MOL000422	Beta-secretase 1	BACE1	P56817	CHEMBL4822	Protease	0.402643	6 / 17
Chaihu	MOL000422	Tyrosine-protein kinase receptor UFO	AXL	P30530	CHEMBL4895	Kinase	0.402643	2 / 4
Chaihu	MOL000422	NUAK family SNF1-like kinase 1	NUAK1	O60285	CHEMBL5784	Kinase	0.402643	1 / 2
Chaihu	MOL000422	Aldo-keto reductase family 1 member C2 (by homology)	AKR1C2	P52895	CHEMBL5847	Enzyme	0.402643	1 / 1
Chaihu	MOL000422	Aldo-keto reductase family 1 member C1 (by homology)	AKR1C1	Q04828	CHEMBL5905	Enzyme	0.402643	1 / 1
Chaihu	MOL000422	Aldo-keto-reductase family 1 member C3 (by homology)	AKR1C3	P42330	CHEMBL4681	Enzyme	0.402643	1 / 1
Chaihu	MOL000422	Aldo-keto reductase family 1 member C4 (by homology)	AKR1C4	P17516	CHEMBL4999	Enzyme	0.402643	1 / 1
Chaihu	MOL000422	Carbonic anhydrase XIII (by homology)	CA13	Q8N1Q1	CHEMBL3912	Lyase	0.402643	1 / 1
Chaihu	MOL000422	Aldehyde reductase (by homology)	AKR1A1	P14550	CHEMBL2246	Enzyme	0.402643	1 / 1
Chaihu	MOL000422	Beta amyloid A4 protein	APP	P05067	CHEMBL2487	Membrane receptor	0.295453	2 / 12
Chaihu	MOL000422	Poly [ADP-ribose] polymerase-1	PARP1	P09874	CHEMBL3105	Enzyme	0.295453	3 / 9
Chaihu	MOL000422	Matrix metalloproteinase 12	MMP12	P39900	CHEMBL4393	Protease	0.295453	1 / 1
Chaihu	MOL000422	Lymphocyte differentiation antigen CD38	CD38	P28907	CHEMBL4660	Enzyme	0.295453	2 / 2
Chaihu	MOL000422	DNA topoisomerase I (by homology)	TOP1	P11387	CHEMBL1781	Isomerase	0.295453	1 / 1
Chaihu	MOL000422	Estrogen receptor alpha	ESR1	P03372	CHEMBL206	Nuclear receptor	0.270837	73 / 38
Chaihu	MOL000422	Cyclooxygenase-2	PTGS2	P35354	CHEMBL230	Oxidoreductase	0.270837	1 / 25
Chaihu	MOL000422	Cystic fibrosis transmembrane conductance regulator	CFTR	P13569	CHEMBL4051	Other ion channel	0.270837	1 / 1
Chaihu	MOL000422	6-phosphofructo-2-kinase/fructose-2,6-bisphosphatase 3	PFKFB3	Q16875	CHEMBL2331053	Enzyme	0.262582	2 / 2
Chaihu	MOL000422	AMY1C	AMY1A	P04745	CHEMBL2478	Enzyme	0.237885	1 / 1
Chaihu	MOL000422	G protein-coupled receptor kinase 6	GRK6	P43250	CHEMBL6144	Kinase	0.237885	2 / 4
Chaihu	MOL000422	Telomerase reverse transcriptase	TERT	O14746	CHEMBL2916	Enzyme	0.229686	9 / 22
Chaihu	MOL000422	Microtubule-associated protein tau	MAPT	P10636	CHEMBL1293224	Unclassified protein	0.171979	1 / 1
Chaihu	MOL004598	ATP-binding cassette sub-family G member 2	ABCG2	Q9UNQ0	CHEMBL5393	Primary active transporter	0.472795	41 / 49
Chaihu	MOL004598	Plasminogen	PLG	P00747	CHEMBL1801	Protease	0.207349	0 / 2
Chaihu	MOL004598	Adenosine A3 receptor	ADORA3	P0DMS8	CHEMBL256	Family A G protein-coupled receptor	0.19929	131 / 19
Chaihu	MOL004598	Adenosine A1 receptor	ADORA1	P30542	CHEMBL226	Family A G protein-coupled receptor	0.183235	319 / 22
Chaihu	MOL004598	Adenosine A2a receptor	ADORA2A	P29274	CHEMBL251	Family A G protein-coupled receptor	0.159097	262 / 10
Chaihu	MOL004598	Carbonic anhydrase II	CA2	P00918	CHEMBL205	Lyase	0.159097	161 / 17
Chaihu	MOL004598	Carbonic anhydrase VII	CA7	P43166	CHEMBL2326	Lyase	0.159097	32 / 15
Chaihu	MOL004598	Carbonic anhydrase XII	CA12	O43570	CHEMBL3242	Lyase	0.151058	118 / 17
Chaihu	MOL004598	Serine/threonine-protein kinase PLK1	PLK1	P53350	CHEMBL3024	Kinase	0.143015	72 / 3
Chaihu	MOL004598	P-glycoprotein 1	ABCB1	P08183	CHEMBL4302	Primary active transporter	0.143015	53 / 46
Chaihu	MOL004598	Aldose reductase	AKR1B1	P15121	CHEMBL1900	Enzyme	0.143015	1 / 66
Chaihu	MOL004598	NADPH oxidase 4	NOX4	Q9NPH5	CHEMBL1250375	Enzyme	0.143015	7 / 8
Chaihu	MOL004598	Tyrosine-protein kinase receptor FLT3	FLT3	P36888	CHEMBL1974	Kinase	0.134972	119 / 6
Chaihu	MOL004598	Epidermal growth factor receptor erbB1	EGFR	P00533	CHEMBL203	Kinase	0.134972	316 / 24
Chaihu	MOL004598	Vascular endothelial growth factor receptor 2	KDR	P35968	CHEMBL279	Kinase	0.126929	567 / 3
Chaihu	MOL004598	Xanthine dehydrogenase	XDH	P47989	CHEMBL1929	Oxidoreductase	0.126929	3 / 21
Chaihu	MOL004598	Serine/threonine-protein kinase Aurora-B	AURKB	Q96GD4	CHEMBL2185	Kinase	0.126929	91 / 3
Chaihu	MOL004598	Tyrosine-protein kinase SYK	SYK	P43405	CHEMBL2599	Kinase	0.126929	306 / 3
Chaihu	MOL004598	Glycogen synthase kinase-3 beta	GSK3B	P49841	CHEMBL262	Kinase	0.126929	201 / 3
Chaihu	MOL004598	Cytochrome P450 1B1	CYP1B1	Q16678	CHEMBL4878	Cytochrome P450	0.126929	6 / 45
Chaihu	MOL004598	Carbonic anhydrase I	CA1	P00915	CHEMBL261	Lyase	0.126929	157 / 8
Chaihu	MOL004598	Carbonic anhydrase XIII	CA13	Q8N1Q1	CHEMBL3912	Lyase	0.126929	31 / 3
Chaihu	MOL004598	Arachidonate 5-lipoxygenase	ALOX5	P09917	CHEMBL215	Oxidoreductase	0.126929	48 / 47
Chaihu	MOL004598	Serine/threonine-protein kinase PIM1	PIM1	P11309	CHEMBL2147	Kinase	0.118883	30 / 5
Chaihu	MOL004598	Hepatocyte growth factor receptor	MET	P08581	CHEMBL3717	Kinase	0.118883	378 / 4
Chaihu	MOL004598	Beta-secretase 1	BACE1	P56817	CHEMBL4822	Protease	0.118883	141 / 17
Chaihu	MOL004598	Tyrosine-protein kinase SRC	SRC	P12931	CHEMBL267	Kinase	0.118883	126 / 10
Chaihu	MOL004598	Cyclin-dependent kinase 1	CDK1	P06493	CHEMBL308	Kinase	0.118883	77 / 8
Chaihu	MOL004598	Focal adhesion kinase 1	PTK2	Q05397	CHEMBL2695	Kinase	0.118883	77 / 2
Chaihu	MOL004598	Beta amyloid A4 protein	APP	P05067	CHEMBL2487	Membrane receptor	0.118883	15 / 7
Chaihu	MOL004598	PI3-kinase p110-gamma subunit	PIK3CG	P48736	CHEMBL3267	Enzyme	0.118883	131 / 1
Chaihu	MOL004598	Carbonic anhydrase VI	CA6	P23280	CHEMBL3025	Lyase	0.118883	23 / 1
Chaihu	MOL004598	Casein kinase II alpha	CSNK2A1	P68400	CHEMBL3629	Kinase	0.118883	29 / 2
Chaihu	MOL004598	Tyrosine-protein kinase receptor UFO	AXL	P30530	CHEMBL4895	Kinase	0.118883	12 / 3
Chaihu	MOL004598	Cyclin-dependent kinase 5/CDK5 activator 1	CDK5R1 CDK5	Q15078 Q00535	CHEMBL1907600	Kinase	0.118883	84 / 9
Chaihu	MOL004598	Stem cell growth factor receptor	KIT	P10721	CHEMBL1936	Kinase	0.118883	89 / 2
Chaihu	MOL004598	Thrombin	F2	P00734	CHEMBL204	Protease	0.118883	60 / 2
Chaihu	MOL004598	Matrix metalloproteinase 13	MMP13	P45452	CHEMBL280	Protease	0.118883	82 / 1
Chaihu	MOL004598	Insulin-like growth factor I receptor	IGF1R	P08069	CHEMBL1957	Kinase	0.118883	43 / 3
Chaihu	MOL004598	Insulin receptor	INSR	P06213	CHEMBL1981	Kinase	0.118883	36 / 1
Chaihu	MOL004598	Myosin light chain kinase, smooth muscle	MYLK	Q15746	CHEMBL2428	Kinase	0.118883	3 / 1
Chaihu	MOL004598	Death-associated protein kinase 1	DAPK1	P53355	CHEMBL2558	Kinase	0.118883	1 / 2
Chaihu	MOL004598	Protein kinase N1	PKN1	Q16512	CHEMBL3384	Kinase	0.118883	1 / 2
Chaihu	MOL004598	Serine/threonine-protein kinase NEK2	NEK2	P51955	CHEMBL3835	Kinase	0.118883	5 / 2
Chaihu	MOL004598	ALK tyrosine kinase receptor	ALK	Q9UM73	CHEMBL4247	Kinase	0.118883	36 / 3
Chaihu	MOL004598	Serine/threonine-protein kinase NEK6	NEK6	Q9HC98	CHEMBL4309	Kinase	0.118883	1 / 2
Chaihu	MOL004598	NUAK family SNF1-like kinase 1	NUAK1	O60285	CHEMBL5784	Kinase	0.118883	2 / 2
Chaihu	MOL004598	Induced myeloid leukemia cell differentiation protein Mcl-1	MCL1	Q07820	CHEMBL4361	Other cytosolic protein	0.118883	10 / 4
Chaihu	MOL004598	Matrix metalloproteinase 2	MMP2	P08253	CHEMBL333	Protease	0.118883	69 / 2
Chaihu	MOL004598	Lysine-specific demethylase 4D-like	KDM4E	B2RXH2	CHEMBL1293226	Eraser	0.118883	0 / 2
Chaihu	MOL004598	DNA topoisomerase II alpha	TOP2A	P11388	CHEMBL1806	Isomerase	0.118883	0 / 1
Chaihu	MOL004598	PI3-kinase p85-alpha subunit	PIK3R1	P27986	CHEMBL2506	Enzyme	0.118883	0 / 1
Chaihu	MOL004598	Liver glycogen phosphorylase	PYGL	P06737	CHEMBL2568	Enzyme	0.118883	0 / 1
Chaihu	MOL004598	Carbonic anhydrase III	CA3	P07451	CHEMBL2885	Lyase	0.118883	0 / 1
Chaihu	MOL004598	Phospholipase A2 group 1B	PLA2G1B	P04054	CHEMBL4426	Enzyme	0.118883	0 / 1
Chaihu	MOL004598	Carbonic anhydrase VA	CA5A	P35218	CHEMBL4789	Lyase	0.118883	0 / 1
Chaihu	MOL004598	DNA-(apurinic or apyrimidinic site) lyase	APEX1	P27695	CHEMBL5619	Enzyme	0.118883	0 / 1
Chaihu	MOL004598	Aldo-keto reductase family 1 member C2 (by homology)	AKR1C2	P52895	CHEMBL5847	Enzyme	0.118883	0 / 1
Chaihu	MOL004598	Aldo-keto reductase family 1 member C1 (by homology)	AKR1C1	Q04828	CHEMBL5905	Enzyme	0.118883	0 / 1
Chaihu	MOL004598	Aldo-keto reductase family 1 member C4 (by homology)	AKR1C4	P17516	CHEMBL4999	Enzyme	0.118883	0 / 1
Chaihu	MOL004598	Aldehyde reductase (by homology)	AKR1A1	P14550	CHEMBL2246	Enzyme	0.118883	0 / 1
Chaihu	MOL004598	CaM kinase II beta	CAMK2B	Q13554	CHEMBL4121	Kinase	0.118883	1 / 1
Chaihu	MOL004598	Mu opioid receptor	OPRM1	P35372	CHEMBL233	Family A G protein-coupled receptor	0.118883	9 / 1
Chaihu	MOL004598	Dopamine D4 receptor	DRD4	P21917	CHEMBL219	Family A G protein-coupled receptor	0.118883	52 / 1
Chaihu	MOL004598	Matrix metalloproteinase 3	MMP3	P08254	CHEMBL283	Protease	0.118883	22 / 1
Chaihu	MOL004598	Matrix metalloproteinase 9	MMP9	P14780	CHEMBL321	Protease	0.118883	54 / 2
Chaihu	MOL004598	Cyclin-dependent kinase 2	CDK2	P24941	CHEMBL301	Kinase	0.118883	143 / 12
Chaihu	MOL004598	Monoamine oxidase A	MAOA	P21397	CHEMBL1951	Oxidoreductase	0.118883	29 / 7
Chaihu	MOL004598	Delta opioid receptor	OPRD1	P41143	CHEMBL236	Family A G protein-coupled receptor	0.118883	10 / 5
Chaihu	MOL004598	Carbonic anhydrase IX	CA9	Q16790	CHEMBL3594	Lyase	0.118883	106 / 7
Chaihu	MOL004598	Carbonic anhydrase IV	CA4	P22748	CHEMBL3729	Lyase	0.118883	4 / 12
Chaihu	MOL004598	Serine/threonine-protein kinase AKT	AKT1	P31749	CHEMBL4282	Kinase	0.118883	35 / 4
Chaihu	MOL004598	Nitric oxide synthase, inducible	NOS2	P35228	CHEMBL4481	Enzyme	0.118883	23 / 3
Chaihu	MOL004598	Acetylcholinesterase	ACHE	P22303	CHEMBL220	Hydrolase	0.118883	48 / 31
Chaihu	MOL004598	Vasopressin V2 receptor	AVPR2	P30518	CHEMBL1790	Family A G protein-coupled receptor	0.118883	72 / 1
Chaihu	MOL004598	Cyclin-dependent kinase 6	CDK6	Q00534	CHEMBL2508	Kinase	0.118883	0 / 3
Chaihu	MOL004598	Arginase-1 (by homology)	ARG1	P05089	CHEMBL1075097	Enzyme	0.118883	0 / 2
Chaihu	MOL004598	Arachidonate 15-lipoxygenase	ALOX15	P16050	CHEMBL2903	Enzyme	0.118883	3 / 4
Chaihu	MOL004598	Cytochrome P450 19A1	CYP19A1	P11511	CHEMBL1978	Cytochrome P450	0.118883	13 / 16
Chaihu	MOL004598	Cyclooxygenase-2	PTGS2	P35354	CHEMBL230	Oxidoreductase	0.118883	67 / 42
Chaihu	MOL004598	Arachidonate 12-lipoxygenase	ALOX12	P18054	CHEMBL3687	Enzyme	0.118883	2 / 3
Chaihu	MOL004598	Cyclin-dependent kinase 1/cyclin B	CCNB3 CDK1 CCNB1 CCNB2	Q8WWL7 P06493 P14635 O95067	CHEMBL2094127	Other cytosolic protein	0.118883	16 / 4
Chaihu	MOL004598	Tyrosinase	TYR	P14679	CHEMBL1973	Oxidoreductase	0.118883	0 / 1
Chaihu	MOL004598	Aryl hydrocarbon receptor	AHR	P35869	CHEMBL3201	Transcription factor	0.118883	0 / 1
Chaihu	MOL004598	Estradiol 17-beta-dehydrogenase 2	HSD17B2	P37059	CHEMBL2789	Enzyme	0.118883	8 / 3
Chaihu	MOL004598	Estrogen receptor beta	ESR2	Q92731	CHEMBL242	Nuclear receptor	0.118883	10 / 11
Chaihu	MOL004598	Estrogen-related receptor alpha	ESRRA	P11474	CHEMBL3429	Nuclear receptor	0.118883	5 / 1
Chaihu	MOL004598	Multidrug resistance-associated protein 1	ABCC1	P33527	CHEMBL3004	Primary active transporter	0.118883	6 / 11
Chaihu	MOL004598	Carbonic anhydrase XIV	CA14	Q9ULX7	CHEMBL3510	Lyase	0.118883	7 / 1
Chaihu	MOL004598	Microtubule-associated protein tau	MAPT	P10636	CHEMBL1293224	Unclassified protein	0.118883	2 / 1
Chaihu	MOL004598	Poly [ADP-ribose] polymerase-1	PARP1	P09874	CHEMBL3105	Enzyme	0.118883	139 / 9
Chaihu	MOL004598	Aldo-keto-reductase family 1 member C3	AKR1C3	P42330	CHEMBL4681	Enzyme	0.118883	3 / 1
Chaihu	MOL004598	Beta-galactoside alpha-2,6-sialyltransferase 1	ST6GAL1	P15907	CHEMBL3596075	Transferase	0.118883	0 / 2
Chaihu	MOL004598	Myeloperoxidase	MPO	P05164	CHEMBL2439	Enzyme	0.118883	2 / 1
Chaihu	MOL004598	Receptor-type tyrosine-protein phosphatase S	PTPRS	Q13332	CHEMBL2396508	Phosphatase	0.118883	0 / 8
Chaihu	MOL004598	DNA-3-methyladenine glycosylase	MPG	P29372	CHEMBL3396943	Enzyme	0.118883	0 / 1
Chaihu	MOL004598	G-protein coupled receptor 35	GPR35	Q9HC97	CHEMBL1293267	Family A G protein-coupled receptor	0.118883	1 / 4
Chaihu	MOL004598	6-phosphofructo-2-kinase/fructose-2,6-bisphosphatase 3	PFKFB3	Q16875	CHEMBL2331053	Enzyme	0.118883	42 / 2
Chaihu	MOL004598	Telomerase reverse transcriptase	TERT	O14746	CHEMBL2916	Enzyme	0.118883	13 / 22
Chaihu	MOL004598	Macrophage colony stimulating factor receptor	CSF1R	P07333	CHEMBL1844	Kinase	0.118883	95 / 0
Chaihu	MOL004609	Aldose reductase (by homology)	AKR1B1	P15121	CHEMBL1900	Enzyme	0.450215	38 / 72
Chaihu	MOL004609	ATP-binding cassette sub-family G member 2	ABCG2	Q9UNQ0	CHEMBL5393	Primary active transporter	0.125572	19 / 50
Chaihu	MOL004609	Delta opioid receptor	OPRD1	P41143	CHEMBL236	Family A G protein-coupled receptor	0.117455	4 / 5
Chaihu	MOL004609	Adenosine A1 receptor	ADORA1	P30542	CHEMBL226	Family A G protein-coupled receptor	0.117455	25 / 23
Chaihu	MOL004609	Arachidonate 5-lipoxygenase	ALOX5	P09917	CHEMBL215	Oxidoreductase	0.10934	35 / 47
Chaihu	MOL004609	Adenosine A2a receptor (by homology)	ADORA2A	P29274	CHEMBL251	Family A G protein-coupled receptor	0.10934	18 / 11
Chaihu	MOL004609	Adenosine A3 receptor	ADORA3	P0DMS8	CHEMBL256	Family A G protein-coupled receptor	0.10934	11 / 23
Chaihu	MOL004609	Carbonic anhydrase II	CA2	P00918	CHEMBL205	Lyase	0.10934	35 / 16
Chaihu	MOL004609	Carbonic anhydrase VII	CA7	P43166	CHEMBL2326	Lyase	0.10934	9 / 13
Chaihu	MOL004609	Carbonic anhydrase IV	CA4	P22748	CHEMBL3729	Lyase	0.10934	3 / 12
Chaihu	MOL004609	NADPH oxidase 4	NOX4	Q9NPH5	CHEMBL1250375	Enzyme	0.10934	5 / 8
Chaihu	MOL004609	Xanthine dehydrogenase	XDH	P47989	CHEMBL1929	Oxidoreductase	0.10934	2 / 19
Chaihu	MOL004609	Cytochrome P450 1B1	CYP1B1	Q16678	CHEMBL4878	Cytochrome P450	0.10934	2 / 46
Chaihu	MOL004609	Estrogen receptor beta	ESR2	Q92731	CHEMBL242	Nuclear receptor	0.10934	16 / 19
Chaihu	MOL004609	Plasminogen	PLG	P00747	CHEMBL1801	Protease	0.10934	4 / 2
Chaihu	MOL004609	Phospholipase A2 group IIA	PLA2G2A	P14555	CHEMBL3474	Enzyme	0.10934	0 / 2
Chaihu	MOL004609	Multidrug resistance-associated protein 1	ABCC1	P33527	CHEMBL3004	Primary active transporter	0.10934	4 / 11
Chaihu	MOL004609	Carbonic anhydrase XII	CA12	O43570	CHEMBL3242	Lyase	0.10934	21 / 16
Chaihu	MOL004609	Microtubule-associated protein tau	MAPT	P10636	CHEMBL1293224	Unclassified protein	0.10934	0 / 1
Chaihu	MOL004609	Lysine-specific demethylase 4D-like	KDM4E	B2RXH2	CHEMBL1293226	Eraser	0.10934	0 / 2
Chaihu	MOL004609	G-protein coupled receptor 35	GPR35	Q9HC97	CHEMBL1293267	Family A G protein-coupled receptor	0.10934	0 / 4
Chaihu	MOL004609	DNA topoisomerase II alpha	TOP2A	P11388	CHEMBL1806	Isomerase	0.10934	0 / 1
Chaihu	MOL004609	Glyoxalase I	GLO1	Q04760	CHEMBL2424	Enzyme	0.10934	0 / 4
Chaihu	MOL004609	Myeloperoxidase	MPO	P05164	CHEMBL2439	Enzyme	0.10934	0 / 1
Chaihu	MOL004609	PI3-kinase p85-alpha subunit	PIK3R1	P27986	CHEMBL2506	Enzyme	0.10934	0 / 1
Chaihu	MOL004609	Death-associated protein kinase 1	DAPK1	P53355	CHEMBL2558	Kinase	0.10934	0 / 2
Chaihu	MOL004609	Liver glycogen phosphorylase	PYGL	P06737	CHEMBL2568	Enzyme	0.10934	0 / 1
Chaihu	MOL004609	Carbonic anhydrase III	CA3	P07451	CHEMBL2885	Lyase	0.10934	0 / 1
Chaihu	MOL004609	Protein kinase N1	PKN1	Q16512	CHEMBL3384	Kinase	0.10934	0 / 3
Chaihu	MOL004609	Casein kinase II alpha	CSNK2A1	P68400	CHEMBL3629	Kinase	0.10934	0 / 2
Chaihu	MOL004609	Serine/threonine-protein kinase NEK2	NEK2	P51955	CHEMBL3835	Kinase	0.10934	0 / 2
Chaihu	MOL004609	CaM kinase II beta	CAMK2B	Q13554	CHEMBL4121	Kinase	0.10934	0 / 2
Chaihu	MOL004609	Serine/threonine-protein kinase NEK6	NEK6	Q9HC98	CHEMBL4309	Kinase	0.10934	0 / 2
Chaihu	MOL004609	Phospholipase A2 group 1B	PLA2G1B	P04054	CHEMBL4426	Enzyme	0.10934	0 / 1
Chaihu	MOL004609	DNA-(apurinic or apyrimidinic site) lyase	APEX1	P27695	CHEMBL5619	Enzyme	0.10934	0 / 1
Chaihu	MOL004609	NUAK family SNF1-like kinase 1	NUAK1	O60285	CHEMBL5784	Kinase	0.10934	0 / 2
Chaihu	MOL004609	Aldo-keto reductase family 1 member C2 (by homology)	AKR1C2	P52895	CHEMBL5847	Enzyme	0.10934	0 / 1
Chaihu	MOL004609	Aldo-keto reductase family 1 member C1 (by homology)	AKR1C1	Q04828	CHEMBL5905	Enzyme	0.10934	0 / 1
Chaihu	MOL004609	Aldo-keto-reductase family 1 member C3 (by homology)	AKR1C3	P42330	CHEMBL4681	Enzyme	0.10934	0 / 1
Chaihu	MOL004609	Aldo-keto reductase family 1 member C4 (by homology)	AKR1C4	P17516	CHEMBL4999	Enzyme	0.10934	0 / 1
Chaihu	MOL004609	Aldehyde reductase (by homology)	AKR1A1	P14550	CHEMBL2246	Enzyme	0.10934	0 / 1
Chaihu	MOL004609	Receptor-type tyrosine-protein phosphatase S	PTPRS	Q13332	CHEMBL2396508	Phosphatase	0.10934	0 / 8
Chaihu	MOL004609	Beta-secretase 1	BACE1	P56817	CHEMBL4822	Protease	0.10934	151 / 17
Chaihu	MOL004609	Lymphocyte differentiation antigen CD38	CD38	P28907	CHEMBL4660	Enzyme	0.10934	0 / 3
Chaihu	MOL004609	Tankyrase-2	TNKS2	Q9H2K2	CHEMBL6154	Enzyme	0.10934	0 / 12
Chaihu	MOL004609	Tankyrase-1	TNKS	O95271	CHEMBL6164	Enzyme	0.10934	0 / 27
Chaihu	MOL004609	Arginase-1 (by homology)	ARG1	P05089	CHEMBL1075097	Enzyme	0.10934	0 / 2
Chaihu	MOL004609	Stem cell growth factor receptor	KIT	P10721	CHEMBL1936	Kinase	0.10934	7 / 3
Chaihu	MOL004609	Matrix metalloproteinase 13	MMP13	P45452	CHEMBL280	Protease	0.10934	97 / 1
Chaihu	MOL004609	Matrix metalloproteinase 2	MMP2	P08253	CHEMBL333	Protease	0.10934	112 / 2
Chaihu	MOL004609	DNA-3-methyladenine glycosylase	MPG	P29372	CHEMBL3396943	Enzyme	0.10934	0 / 1
Chaihu	MOL004609	Solute carrier family 22 member 12	SLC22A12	Q96S37	CHEMBL6120	Electrochemical transporter	0.10934	0 / 1
Chaihu	MOL004609	Serine/threonine-protein kinase PIM1	PIM1	P11309	CHEMBL2147	Kinase	0.10934	11 / 7
Chaihu	MOL004609	Insulin-like growth factor I receptor	IGF1R	P08069	CHEMBL1957	Kinase	0.10934	1 / 3
Chaihu	MOL004609	Insulin receptor	INSR	P06213	CHEMBL1981	Kinase	0.10934	1 / 1
Chaihu	MOL004609	Epidermal growth factor receptor erbB1	EGFR	P00533	CHEMBL203	Kinase	0.10934	41 / 28
Chaihu	MOL004609	Tyrosine-protein kinase SRC	SRC	P12931	CHEMBL267	Kinase	0.10934	11 / 10
Chaihu	MOL004609	Focal adhesion kinase 1	PTK2	Q05397	CHEMBL2695	Kinase	0.10934	2 / 2
Chaihu	MOL004609	Vascular endothelial growth factor receptor 2	KDR	P35968	CHEMBL279	Kinase	0.10934	75 / 3
Chaihu	MOL004609	Mu opioid receptor (by homology)	OPRM1	P35372	CHEMBL233	Family A G protein-coupled receptor	0.10934	6 / 1
Chaihu	MOL004609	Cyclin-dependent kinase 6	CDK6	Q00534	CHEMBL2508	Kinase	0.10934	0 / 4
Chaihu	MOL004609	Myosin light chain kinase, smooth muscle	MYLK	Q15746	CHEMBL2428	Kinase	0.10934	1 / 1
Chaihu	MOL004609	Glycogen synthase kinase-3 beta	GSK3B	P49841	CHEMBL262	Kinase	0.10934	35 / 5
Chaihu	MOL004609	Estradiol 17-beta-dehydrogenase 2	HSD17B2	P37059	CHEMBL2789	Enzyme	0.10934	25 / 3
Chaihu	MOL004609	AMY1C	AMY1A	P04745	CHEMBL2478	Enzyme	0.10934	0 / 1
Chaihu	MOL004609	Ornithine decarboxylase	ODC1	P11926	CHEMBL1869	Lyase	0.10934	1 / 1
Chaihu	MOL004609	Tyrosine-protein kinase receptor FLT3	FLT3	P36888	CHEMBL1974	Kinase	0.10934	21 / 7
Chaihu	MOL004609	Tyrosinase	TYR	P14679	CHEMBL1973	Oxidoreductase	0.10934	0 / 2
Chaihu	MOL004609	Aryl hydrocarbon receptor	AHR	P35869	CHEMBL3201	Transcription factor	0.10934	0 / 1
Chaihu	MOL004609	Estrogen-related receptor alpha	ESRRA	P11474	CHEMBL3429	Nuclear receptor	0.10934	0 / 2
Chaihu	MOL004609	Beta amyloid A4 protein	APP	P05067	CHEMBL2487	Membrane receptor	0.10934	8 / 12
Chaihu	MOL004609	Matrix metalloproteinase 3	MMP3	P08254	CHEMBL283	Protease	0.10934	60 / 1
Chaihu	MOL004609	Telomerase reverse transcriptase	TERT	O14746	CHEMBL2916	Enzyme	0.10934	5 / 22
Chaihu	MOL004609	Arachidonate 12-lipoxygenase	ALOX12	P18054	CHEMBL3687	Enzyme	0.10934	7 / 5
Chaihu	MOL004609	Monoamine oxidase A	MAOA	P21397	CHEMBL1951	Oxidoreductase	0.10934	7 / 13
Chaihu	MOL004609	Carbonic anhydrase XIV	CA14	Q9ULX7	CHEMBL3510	Lyase	0.10934	5 / 1
Chaihu	MOL004609	Carbonic anhydrase IX	CA9	Q16790	CHEMBL3594	Lyase	0.10934	23 / 5
Chaihu	MOL004609	Carbonic anhydrase VA	CA5A	P35218	CHEMBL4789	Lyase	0.10934	4 / 1
Chaihu	MOL004609	Cyclin-dependent kinase 2	CDK2	P24941	CHEMBL301	Kinase	0.10934	18 / 12
Chaihu	MOL004609	Hepatocyte growth factor receptor	MET	P08581	CHEMBL3717	Kinase	0.10934	33 / 4
Chaihu	MOL004609	P-glycoprotein 1	ABCB1	P08183	CHEMBL4302	Primary active transporter	0.10934	2 / 47
Chaihu	MOL004609	Arachidonate 15-lipoxygenase	ALOX15	P16050	CHEMBL2903	Enzyme	0.10934	7 / 5
Chaihu	MOL004609	Matrix metalloproteinase 9	MMP9	P14780	CHEMBL321	Protease	0.10934	121 / 2
Chaihu	MOL004609	Serine/threonine-protein kinase Aurora-B	AURKB	Q96GD4	CHEMBL2185	Kinase	0.10934	12 / 4
Chaihu	MOL004609	Cystic fibrosis transmembrane conductance regulator	CFTR	P13569	CHEMBL4051	Other ion channel	0.10934	0 / 1
Chaihu	MOL004609	NEDD8-activating enzyme E1 regulatory subunit	NAE1	Q13564	CHEMBL2016431	Unclassified protein	0.10934	0 / 1
Chaihu	MOL004609	Carbonic anhydrase I	CA1	P00915	CHEMBL261	Lyase	0.10934	31 / 6
Chaihu	MOL004609	PI3-kinase p110-gamma subunit	PIK3CG	P48736	CHEMBL3267	Enzyme	0.10934	8 / 1
Chaihu	MOL004609	Cyclooxygenase-2	PTGS2	P35354	CHEMBL230	Oxidoreductase	0.10934	9 / 13
Chaihu	MOL004609	Tyrosine-protein kinase SYK	SYK	P43405	CHEMBL2599	Kinase	0.10934	25 / 3
Chaihu	MOL004609	Estradiol 17-beta-dehydrogenase 1	HSD17B1	P14061	CHEMBL3181	Enzyme	0.10934	25 / 4
Chaihu	MOL004609	Serine/threonine-protein kinase PLK1	PLK1	P53350	CHEMBL3024	Kinase	0.10934	8 / 3
Chaihu	MOL004609	Carbonic anhydrase XIII	CA13	Q8N1Q1	CHEMBL3912	Lyase	0.10934	6 / 1
Chaihu	MOL004609	Beta-galactoside alpha-2,6-sialyltransferase 1	ST6GAL1	P15907	CHEMBL3596075	Transferase	0.10934	0 / 2
Chaihu	MOL004609	Cytochrome P450 19A1	CYP19A1	P11511	CHEMBL1978	Cytochrome P450	0.10934	1 / 18
Chaihu	MOL004609	Androgen Receptor	AR	P10275	CHEMBL1871	Nuclear receptor	0.10934	0 / 16
Chaihu	MOL004609	Carbonyl reductase [NADPH] 1	CBR1	P16152	CHEMBL5586	Enzyme	0.10934	0 / 2
Chaihu	MOL004609	Matrix metalloproteinase 12	MMP12	P39900	CHEMBL4393	Protease	0.10934	14 / 1
Chaihu	MOL004609	Cyclin-dependent kinase 1/cyclin B	CCNB3 CDK1 CCNB1 CCNB2	Q8WWL7 P06493 P14635 O95067	CHEMBL2094127	Other cytosolic protein	0.10934	2 / 6
Chaihu	MOL004609	Vasopressin V2 receptor	AVPR2	P30518	CHEMBL1790	Family A G protein-coupled receptor	0.10934	4 / 1
Chaihu	MOL013187	Dopamine transporter	SLC6A3	Q01959	CHEMBL238	Electrochemical transporter	0.10934	98 / 53
Chaihu	MOL013187	Arachidonate 15-lipoxygenase	ALOX15	P16050	CHEMBL2903	Enzyme	0.10934	1 / 15
Chaihu	MOL013187	Norepinephrine transporter	SLC6A2	P23975	CHEMBL222	Electrochemical transporter	0.10934	138 / 50
Chaihu	MOL013187	Testis-specific androgen-binding protein	SHBG	P04278	CHEMBL3305	Secreted protein	0.10934	4 / 12
Chaihu	MOL013187	Arachidonate 12-lipoxygenase	ALOX12	P18054	CHEMBL3687	Enzyme	0.10934	9 / 8
Chaihu	MOL013187	Induced myeloid leukemia cell differentiation protein Mcl-1	MCL1	Q07820	CHEMBL4361	Other cytosolic protein	0.10934	14 / 1
Chaihu	MOL013187	c-Jun N-terminal kinase 2	MAPK9	P45984	CHEMBL4179	Kinase	0.10934	10 / 2
Chaihu	MOL013187	EWS-Fli1 protein	EWS-Fli1	Q16198	CHEMBL2010625	Unclassified protein	0.10934	1 / 0
Chaihu	MOL013187	Phosphodiesterase 10A	PDE10A	Q9Y233	CHEMBL4409	Phosphodiesterase	0.10934	171 / 0
Chaihu	MOL013187	Tyrosyl-DNA phosphodiesterase 2	TDP2	O95551	CHEMBL2169736	Enzyme	0.10934	20 / 0
Chaihu	MOL013187	Dual specificity mitogen-activated protein kinase kinase 1	MAP2K1	Q02750	CHEMBL3587	Kinase	0.10934	97 / 1
Chaihu	MOL013187	Inosine-5'-monophosphate dehydrogenase 2	IMPDH2	P12268	CHEMBL2002	Oxidoreductase	0.10934	79 / 0
Chaihu	MOL013187	Glycogen synthase kinase-3 beta	GSK3B	P49841	CHEMBL262	Kinase	0.10934	101 / 0
Chaihu	MOL013187	Fructose-1,6-bisphosphatase	FBP1	P09467	CHEMBL3975	Enzyme	0.10934	58 / 0
Chaihu	MOL013187	Carbonic anhydrase VII	CA7	P43166	CHEMBL2326	Lyase	0.10934	26 / 0
Chaihu	MOL013187	Carbonic anhydrase XII	CA12	O43570	CHEMBL3242	Lyase	0.10934	67 / 0
Chaihu	MOL013187	Carbonic anhydrase XIV	CA14	Q9ULX7	CHEMBL3510	Lyase	0.10934	18 / 0
Chaihu	MOL013187	Carbonic anhydrase IX	CA9	Q16790	CHEMBL3594	Lyase	0.10934	91 / 0
Chaihu	MOL013187	Carbonic anhydrase VB	CA5B	Q9Y2D0	CHEMBL3969	Lyase	0.10934	12 / 0
Chaihu	MOL013187	Carbonic anhydrase VA	CA5A	P35218	CHEMBL4789	Lyase	0.10934	18 / 0
Chaihu	MOL013187	Acyl-protein thioesterase 1	LYPLA1	O75608	CHEMBL1681631	Enzyme	0.10934	0 / 1
Chaihu	MOL013187	Acyl-protein thioesterase 2	LYPLA2	O95372	CHEMBL1932891	Enzyme	0.10934	0 / 1
Chaihu	MOL013187	Cytochrome P450 17A1 (by homology)	CYP17A1	P05093	CHEMBL3522	Cytochrome P450	0.10934	36 / 0
Chaihu	MOL013187	Prostatic acid phosphatase	ACPP	P15309	CHEMBL2633	Enzyme	0.10934	11 / 0
Chaihu	MOL013187	DNA topoisomerase II alpha	TOP2A	P11388	CHEMBL1806	Isomerase	0.10934	1 / 0
Chaihu	MOL013187	Cyclin-dependent kinase 2/cyclin E	CCNE2 CDK2 CCNE1	O96020 P24941 P24864	CHEMBL2094126	Other cytosolic protein	0.10934	34 / 0
Chaihu	MOL013187	MAP kinase p38 alpha	MAPK14	Q16539	CHEMBL260	Kinase	0.10934	79 / 0
Chaihu	MOL013187	Sulfonylurea receptor 2	ABCC9	O60706	CHEMBL1971	Primary active transporter	0.10934	27 / 0
Chaihu	MOL013187	Caspase-8	CASP8	Q14790	CHEMBL3776	Protease	0.10934	63 / 0
Chaihu	MOL013187	Caspase-1	CASP1	P29466	CHEMBL4801	Protease	0.10934	89 / 0
Chaihu	MOL013187	Serine/threonine-protein kinase mTOR	MTOR	P42345	CHEMBL2842	Kinase	0.10934	111 / 0
Chaihu	MOL013187	Purine nucleoside phosphorylase	PNP	P00491	CHEMBL4338	Enzyme	0.10934	16 / 0
Chaihu	MOL013187	Matrix metalloproteinase 1	MMP1	P03956	CHEMBL332	Protease	0.10934	210 / 0
Chaihu	MOL013187	Matrix metalloproteinase 2	MMP2	P08253	CHEMBL333	Protease	0.10934	160 / 0
Chaihu	MOL013187	Matrix metalloproteinase 8	MMP8	P22894	CHEMBL4588	Protease	0.10934	81 / 0
Chaihu	MOL013187	Serine/threonine-protein kinase Aurora-A	AURKA	O14965	CHEMBL4722	Kinase	0.10934	103 / 0
Chaihu	MOL013187	Tyrosine-protein kinase JAK1	JAK1	P23458	CHEMBL2835	Kinase	0.10934	116 / 0
Chaihu	MOL013187	Tyrosine-protein kinase JAK2	JAK2	O60674	CHEMBL2971	Kinase	0.10934	135 / 0
Chaihu	MOL013187	Pyruvate kinase isozymes M1/M2	PKM	P14618	CHEMBL1075189	Enzyme	0.10934	15 / 0
Chaihu	MOL013187	Bombesin receptor subtype-3	BRS3	P32247	CHEMBL4080	Family A G protein-coupled receptor	0.10934	6 / 0
Chaihu	MOL013187	Eukaryotic translation initiation factor 2-alpha kinase 3	EIF2AK3	Q9NZJ5	CHEMBL6030	Kinase	0.10934	25 / 0
Chaihu	MOL013187	Cytochrome P450 19A1	CYP19A1	P11511	CHEMBL1978	Cytochrome P450	0.10934	66 / 15
Chaihu	MOL013187	Cyclin-dependent kinase 2	CDK2	P24941	CHEMBL301	Kinase	0.10934	77 / 0
Chaihu	MOL013187	Cyclin-dependent kinase 1	CDK1	P06493	CHEMBL308	Kinase	0.10934	61 / 0
Chaihu	MOL013187	Plectin	PLEC	Q15149	CHEMBL1293240	Unclassified protein	0.10934	1 / 0
Chaihu	MOL013187	Tyrosine-protein kinase JAK3	JAK3	P52333	CHEMBL2148	Kinase	0.10934	98 / 0
Chaihu	MOL013187	Poly [ADP-ribose] polymerase-1	PARP1	P09874	CHEMBL3105	Enzyme	0.10934	57 / 0
Chaihu	MOL013187	Tyrosine-protein kinase TYK2	TYK2	P29597	CHEMBL3553	Kinase	0.10934	49 / 0
Chaihu	MOL013187	Bromodomain-containing protein 4	BRD4	O60885	CHEMBL1163125	Reader	0.10934	56 / 0
Chaihu	MOL013187	Serine/threonine-protein kinase PIM1	PIM1	P11309	CHEMBL2147	Kinase	0.10934	58 / 0
Chaihu	MOL013187	Matrix metalloproteinase 13	MMP13	P45452	CHEMBL280	Protease	0.10934	102 / 0
Chaihu	MOL013187	Matrix metalloproteinase 9	MMP9	P14780	CHEMBL321	Protease	0.10934	141 / 0
Chaihu	MOL013187	ADAM17	ADAM17	P78536	CHEMBL3706	Protease	0.10934	116 / 0
Chaihu	MOL013187	Matrix metalloproteinase 14	MMP14	P50281	CHEMBL3869	Protease	0.10934	39 / 0
Chaihu	MOL013187	Matrix metalloproteinase 7	MMP7	P09237	CHEMBL4073	Protease	0.10934	31 / 0
Chaihu	MOL013187	CREB-binding protein/p53	CREBBP	Q92793	CHEMBL5747	Writer	0.10934	12 / 0
Chaihu	MOL013187	Transient receptor potential cation channel subfamily M member 8 (by homology)	TRPM8	Q7Z2W7	CHEMBL1075319	Voltage-gated ion channel	0.10934	5 / 0
Chaihu	MOL013187	Liver glycogen phosphorylase	PYGL	P06737	CHEMBL2568	Enzyme	0.10934	61 / 0
Chaihu	MOL013187	Amine oxidase, copper containing	AOC3	Q16853	CHEMBL3437	Enzyme	0.10934	24 / 0
Chaihu	MOL013187	G-protein coupled receptor kinase 2	GRK2	P25098	CHEMBL4079	Kinase	0.10934	5 / 0
Chaihu	MOL013187	Bradykinin B1 receptor	BDKRB1	P46663	CHEMBL4308	Family A G protein-coupled receptor	0.10934	29 / 0
Chaihu	MOL013187	Serotonin transporter	SLC6A4	P31645	CHEMBL228	Electrochemical transporter	0.10934	129 / 87
Chaihu	MOL013187	Nerve growth factor receptor Trk-A	NTRK1	P04629	CHEMBL2815	Kinase	0.10934	93 / 0
Chaihu	MOL013187	PI3-kinase p110-delta subunit	PIK3CD	O00329	CHEMBL3130	Enzyme	0.10934	84 / 0
Chaihu	MOL013187	DNA-dependent protein kinase	PRKDC	P78527	CHEMBL3142	Kinase	0.10934	34 / 0
Chaihu	MOL013187	PI3-kinase p110-beta subunit	PIK3CB	P42338	CHEMBL3145	Enzyme	0.10934	69 / 0
Chaihu	MOL013187	Inhibitor of apoptosis protein 3	XIAP	P98170	CHEMBL4198	Other cytosolic protein	0.10934	9 / 0
Chaihu	MOL013187	LDL-associated phospholipase A2	PLA2G7	Q13093	CHEMBL3514	Enzyme	0.10934	33 / 0
Chaihu	MOL013187	Calpain 1	CAPN1	P07384	CHEMBL3891	Protease	0.10934	24 / 0
Chaihu	MOL013187	Squalene synthetase	FDFT1	P37268	CHEMBL3338	Enzyme	0.10934	48 / 0
Chaihu	MOL013187	Tyrosine kinase non-receptor protein 2	TNK2	Q07912	CHEMBL4599	Kinase	0.10934	8 / 0
Chaihu	MOL013187	Anandamide amidohydrolase	FAAH	O00519	CHEMBL2243	Enzyme	0.10934	9 / 0
Chaihu	MOL013187	Monoglyceride lipase	MGLL	Q99685	CHEMBL4191	Enzyme	0.10934	6 / 0
Chaihu	MOL013187	Mitogen-activated protein kinase kinase kinase 5	MAP3K5	Q99683	CHEMBL5285	Kinase	0.10934	12 / 0
Chaihu	MOL013187	Cyclin-dependent kinase 5/CDK5 activator 1	CDK5R1 CDK5	Q15078 Q00535	CHEMBL1907600	Kinase	0.10934	33 / 0
Chaihu	MOL013187	CDC7/DBF4 (Cell division cycle 7-related protein kinase/Activator of S phase kinase)	CDC7	O00311	CHEMBL5443	Kinase	0.10934	16 / 0
Chaihu	MOL013187	Cyclin-dependent kinase 9	CDK9	P50750	CHEMBL3116	Kinase	0.10934	15 / 0
Chaihu	MOL013187	Chymase	CMA1	P23946	CHEMBL4068	Protease	0.10934	16 / 0
Chaihu	MOL013187	Beta-secretase 1	BACE1	P56817	CHEMBL4822	Protease	0.10934	326 / 0
Chaihu	MOL013187	GABA-A receptor; alpha-3/beta-3/gamma-2	GABRB3 GABRA3 GABRG2	P28472 P34903 P18507	CHEMBL2094120	Ligand-gated ion channel	0.10934	8 / 0
Chaihu	MOL013187	GABA-A receptor; alpha-1/beta-3/gamma-2	GABRB3 GABRG2 GABRA1	P28472 P18507 P14867	CHEMBL2094121	Ligand-gated ion channel	0.10934	8 / 0
Chaihu	MOL013187	GABA-A receptor; alpha-5/beta-3/gamma-2	GABRB3 GABRG2 GABRA5	P28472 P18507 P31644	CHEMBL2094122	Ligand-gated ion channel	0.10934	9 / 0
Chaihu	MOL013187	GABA-A receptor; alpha-2/beta-3/gamma-2	GABRA2 GABRB3 GABRG2	P47869 P28472 P18507	CHEMBL2094130	Ligand-gated ion channel	0.10934	8 / 0
Chaihu	MOL013187	GABA-A receptor; alpha-6/beta-3/gamma-2	GABRG2 GABRB3 GABRA6	P18507 P28472 Q16445	CHEMBL2095190	Ligand-gated ion channel	0.10934	2 / 0
Chaihu	MOL013187	Heat shock protein HSP 90-alpha	HSP90AA1	P07900	CHEMBL3880	Other cytosolic protein	0.10934	17 / 0
Chaihu	MOL013187	PI3-kinase p110-alpha subunit	PIK3CA	P42336	CHEMBL4005	Enzyme	0.10934	196 / 0
Chaihu	MOL004644	Estrogen receptor alpha	ESR1	P03372	CHEMBL206	Nuclear receptor	0.246151	52 / 27
Chaihu	MOL004644	Estrogen receptor beta	ESR2	Q92731	CHEMBL242	Nuclear receptor	0.0978745	58 / 25
Chaihu	MOL004644	NAD-dependent deacetylase sirtuin 1	SIRT1	Q96EB6	CHEMBL4506	Eraser	0.0978745	2 / 1
Chaihu	MOL004644	Glyoxalase I	GLO1	Q04760	CHEMBL2424	Enzyme	0.0978745	0 / 4
Chaihu	MOL004644	LXR-alpha	NR1H3	Q13133	CHEMBL2808	Nuclear receptor	0.0978745	0 / 1
Chaihu	MOL004644	Phosphodiesterase 4B	PDE4B	Q07343	CHEMBL275	Phosphodiesterase	0.0978745	0 / 1
Chaihu	MOL004644	Lymphocyte differentiation antigen CD38	CD38	P28907	CHEMBL4660	Enzyme	0.0978745	0 / 3
Chaihu	MOL004644	Ornithine decarboxylase	ODC1	P11926	CHEMBL1869	Lyase	0.0978745	0 / 1
Chaihu	MOL004644	Prostaglandin E synthase	PTGES	O14684	CHEMBL5658	Enzyme	0.0978745	0 / 2
Chaihu	MOL004644	Plasminogen	PLG	P00747	CHEMBL1801	Protease	0.0978745	0 / 3
Chaihu	MOL004644	Multidrug resistance-associated protein 1	ABCC1	P33527	CHEMBL3004	Primary active transporter	0.0978745	0 / 11
Chaihu	MOL004644	Testis-specific androgen-binding protein	SHBG	P04278	CHEMBL3305	Secreted protein	0.0978745	1 / 1
Chaihu	MOL004644	Tankyrase-2	TNKS2	Q9H2K2	CHEMBL6154	Enzyme	0.0978745	0 / 9
Chaihu	MOL004644	Tankyrase-1	TNKS	O95271	CHEMBL6164	Enzyme	0.0978745	0 / 15
Chaihu	MOL004644	NEDD8-activating enzyme E1 regulatory subunit	NAE1	Q13564	CHEMBL2016431	Unclassified protein	0.0978745	0 / 1
Chaihu	MOL004644	G-protein coupled receptor 35	GPR35	Q9HC97	CHEMBL1293267	Family A G protein-coupled receptor	0.0978745	0 / 2
Chaihu	MOL004644	Receptor-type tyrosine-protein phosphatase S	PTPRS	Q13332	CHEMBL2396508	Phosphatase	0.0978745	0 / 7
Chaihu	MOL004644	Death-associated protein kinase 1	DAPK1	P53355	CHEMBL2558	Kinase	0.0978745	0 / 2
Chaihu	MOL004644	DNA-3-methyladenine glycosylase	MPG	P29372	CHEMBL3396943	Enzyme	0.0978745	0 / 1
Chaihu	MOL004644	Aldose reductase (by homology)	AKR1B1	P15121	CHEMBL1900	Enzyme	0.0978745	15 / 55
Chaihu	MOL004644	Phosphodiesterase 4D	PDE4D	Q08499	CHEMBL288	Phosphodiesterase	0.0978745	2 / 13
Chaihu	MOL004653	Cannabinoid receptor 1	CNR1	P21554	CHEMBL218	Family A G protein-coupled receptor	0.118883	1180 / 0
Chaihu	MOL004653	Leukocyte elastase	ELANE	P08246	CHEMBL248	Protease	0.118883	179 / 0
Chaihu	MOL004653	Cannabinoid receptor 2	CNR2	P34972	CHEMBL253	Family A G protein-coupled receptor	0.118883	1072 / 0
Chaihu	MOL004653	Macrophage colony stimulating factor receptor	CSF1R	P07333	CHEMBL1844	Kinase	0.118883	173 / 0
Chaihu	MOL004653	Kir3.1/Kir3.2	KCNJ6 KCNJ3	P48051 P48549	CHEMBL3038489	Voltage-gated ion channel	0.118883	42 / 0
Chaihu	MOL004653	Plasma retinol-binding protein	RBP4	P02753	CHEMBL3100	Secreted protein	0.118883	6 / 0
Chaihu	MOL004653	Sodium channel protein type II alpha subunit	SCN2A	Q99250	CHEMBL4187	Voltage-gated ion channel	0.118883	42 / 0
Chaihu	MOL004653	Orexin receptor 2	HCRTR2	O43614	CHEMBL4792	Family A G protein-coupled receptor	0.118883	967 / 0
Chaihu	MOL004653	Sodium channel protein type X alpha subunit	SCN10A	Q9Y5Y9	CHEMBL5451	Voltage-gated ion channel	0.118883	55 / 0
Chaihu	MOL004653	Kir3.1/Kir3.4	KCNJ5 KCNJ3	P48544 P48549	CHEMBL3038488	Voltage-gated ion channel	0.118883	39 / 0
Chaihu	MOL004653	P2X purinoceptor 3	P2RX3	P56373	CHEMBL2998	Ligand-gated ion channel	0.118883	34 / 0
Chaihu	MOL004653	Tyrosine-protein kinase JAK3	JAK3	P52333	CHEMBL2148	Kinase	0.118883	379 / 0
Chaihu	MOL004653	Tyrosine-protein kinase JAK2	JAK2	O60674	CHEMBL2971	Kinase	0.118883	477 / 0
Chaihu	MOL004653	Sodium channel protein type IX alpha subunit	SCN9A	Q15858	CHEMBL4296	Voltage-gated ion channel	0.118883	126 / 0
Chaihu	MOL004653	Cathepsin S	CTSS	P25774	CHEMBL2954	Protease	0.118883	304 / 0
Chaihu	MOL004653	Cathepsin (V and K)	CTSV	O60911	CHEMBL3272	Protease	0.118883	46 / 0
Chaihu	MOL004653	Cathepsin L	CTSL	P07711	CHEMBL3837	Protease	0.118883	259 / 0
Chaihu	MOL004653	Phosphodiesterase 4B	PDE4B	Q07343	CHEMBL275	Phosphodiesterase	0.118883	242 / 0
Chaihu	MOL004653	Elongation of very long chain fatty acids protein 6	ELOVL6	Q9H5J4	CHEMBL5704	Enzyme	0.118883	28 / 0
Chaihu	MOL004653	Cyclophilin A	PPIA	P62937	CHEMBL1949	Isomerase	0.118883	60 / 0
Chaihu	MOL004653	Interleukin-8 receptor B	CXCR2	P25025	CHEMBL2434	Family A G protein-coupled receptor	0.118883	79 / 0
Chaihu	MOL004653	Vascular endothelial growth factor receptor 2	KDR	P35968	CHEMBL279	Kinase	0.118883	808 / 0
Chaihu	MOL004653	Metabotropic glutamate receptor 5	GRM5	P41594	CHEMBL3227	Family C G protein-coupled receptor	0.118883	1100 / 0
Chaihu	MOL004653	Translocator protein (by homology)	TSPO	P30536	CHEMBL5742	Membrane receptor	0.118883	457 / 0
Chaihu	MOL004653	Adenosine A1 receptor	ADORA1	P30542	CHEMBL226	Family A G protein-coupled receptor	0.118883	862 / 0
Chaihu	MOL004653	Thrombin and coagulation factor X	F10	P00742	CHEMBL244	Protease	0.118883	332 / 0
Chaihu	MOL004653	Adenosine A2a receptor	ADORA2A	P29274	CHEMBL251	Family A G protein-coupled receptor	0.118883	659 / 0
Chaihu	MOL004653	Adenosine A3 receptor	ADORA3	P0DMS8	CHEMBL256	Family A G protein-coupled receptor	0.118883	498 / 0
Chaihu	MOL004653	P2X purinoceptor 7	P2RX7	Q99572	CHEMBL4805	Ligand-gated ion channel	0.118883	502 / 0
Chaihu	MOL004653	Potassium channel subfamily K member 3	KCNK3	O14649	CHEMBL2321613	Voltage-gated ion channel	0.118883	41 / 0
Chaihu	MOL004653	Potassium channel subfamily K member 9	KCNK9	Q9NPC2	CHEMBL2321614	Voltage-gated ion channel	0.118883	30 / 0
Chaihu	MOL004653	Transitional endoplasmic reticulum ATPase	VCP	P55072	CHEMBL1075145	Primary active transporter	0.118883	45 / 0
Chaihu	MOL004653	Isocitrate dehydrogenase [NADP] cytoplasmic	IDH1	O75874	CHEMBL2007625	Enzyme	0.118883	237 / 0
Chaihu	MOL004653	DNA-dependent protein kinase	PRKDC	P78527	CHEMBL3142	Kinase	0.118883	103 / 0
Chaihu	MOL004653	Muscarinic acetylcholine receptor M2 (by homology)	CHRM2	P08172	CHEMBL211	Family A G protein-coupled receptor	0.118883	60 / 0
Chaihu	MOL004653	Muscarinic acetylcholine receptor M1	CHRM1	P11229	CHEMBL216	Family A G protein-coupled receptor	0.118883	107 / 0
Chaihu	MOL004653	Muscarinic acetylcholine receptor M3	CHRM3	P20309	CHEMBL245	Family A G protein-coupled receptor	0.118883	120 / 0
Chaihu	MOL004653	Matrix metalloproteinase 9	MMP9	P14780	CHEMBL321	Protease	0.118883	81 / 0
Chaihu	MOL004653	Bradykinin B1 receptor	BDKRB1	P46663	CHEMBL4308	Family A G protein-coupled receptor	0.118883	47 / 0
Chaihu	MOL004653	Neuropeptide Y receptor type 5	NPY5R	Q15761	CHEMBL4561	Family A G protein-coupled receptor	0.118883	366 / 0
Chaihu	MOL004653	Serotonin 1a (5-HT1a) receptor	HTR1A	P08908	CHEMBL214	Family A G protein-coupled receptor	0.118883	224 / 0
Chaihu	MOL004653	Dopamine D2 receptor	DRD2	P14416	CHEMBL217	Family A G protein-coupled receptor	0.118883	343 / 0
Chaihu	MOL004653	Serotonin 7 (5-HT7) receptor	HTR7	P34969	CHEMBL3155	Family A G protein-coupled receptor	0.118883	109 / 0
Chaihu	MOL004653	Serotonin 6 (5-HT6) receptor	HTR6	P50406	CHEMBL3371	Family A G protein-coupled receptor	0.118883	272 / 0
Chaihu	MOL004653	MAP kinase p38 beta	MAPK11	Q15759	CHEMBL3961	Kinase	0.118883	77 / 0
Chaihu	MOL004653	Orexin receptor 1 (by homology)	HCRTR1	O43613	CHEMBL5113	Family A G protein-coupled receptor	0.118883	811 / 0
Chaihu	MOL004653	Integrin alpha-V/beta-3	ITGAV ITGB3	P06756 P05106	CHEMBL1907598	Membrane receptor	0.118883	4 / 0
Chaihu	MOL004653	Tyrosine-protein kinase receptor FLT3	FLT3	P36888	CHEMBL1974	Kinase	0.118883	159 / 0
Chaihu	MOL004653	Tyrosine-protein kinase SRC	SRC	P12931	CHEMBL267	Kinase	0.118883	317 / 0
Chaihu	MOL004653	Cathepsin K	CTSK	P43235	CHEMBL268	Protease	0.118883	417 / 0
Chaihu	MOL004653	Neurokinin 3 receptor	TACR3	P29371	CHEMBL4429	Family A G protein-coupled receptor	0.118883	155 / 0
Chaihu	MOL004653	Nitric oxide synthase, inducible	NOS2	P35228	CHEMBL4481	Enzyme	0.118883	141 / 0
Chaihu	MOL004653	Transient receptor potential cation channel subfamily A member 1	TRPA1	O75762	CHEMBL6007	Voltage-gated ion channel	0.118883	32 / 0
Chaihu	MOL004653	Tyrosine-protein kinase ABL	ABL1	P00519	CHEMBL1862	Kinase	0.118883	250 / 0
Chaihu	MOL004653	Epidermal growth factor receptor erbB1	EGFR	P00533	CHEMBL203	Kinase	0.118883	781 / 0
Chaihu	MOL004653	Complement factor D	CFD	P00746	CHEMBL2176771	Protease	0.118883	156 / 0
Chaihu	MOL004653	Protein-glutamine gamma-glutamyltransferase	TGM2	P21980	CHEMBL2730	Enzyme	0.118883	43 / 0
Chaihu	MOL004653	Protein-glutamine gamma-glutamyltransferase K	TGM1	P22735	CHEMBL2810	Enzyme	0.118883	11 / 0
Chaihu	MOL004653	Chymase	CMA1	P23946	CHEMBL4068	Protease	0.118883	95 / 0
Chaihu	MOL004653	Coagulation factor XIII	F13A1	P00488	CHEMBL4530	Aminoacyltransferase	0.118883	10 / 0
Chaihu	MOL004653	Polyadenylate-binding protein 1	PABPC1	P11940	CHEMBL1293286	Unclassified protein	0.118883	15 / 0
Chaihu	MOL004653	Cyclin-dependent kinase 4/cyclin D	CCND3 CCND1 CDK4 CCND2	P30281 P24385 P11802 P30279	CHEMBL2095942	Other cytosolic protein	0.118883	37 / 0
Chaihu	MOL004653	Carnitine O-palmitoyltransferase 1, liver isoform	CPT1A	P50416	CHEMBL1293194	Enzyme	0.118883	107 / 0
Chaihu	MOL004653	Cyclin-dependent kinase 4/cyclin D1	CCND1 CDK4	P24385 P11802	CHEMBL1907601	Kinase	0.118883	87 / 0
Chaihu	MOL004653	Inhibitor of nuclear factor kappa B kinase beta subunit	IKBKB	O14920	CHEMBL1991	Kinase	0.118883	75 / 0
Chaihu	MOL004653	Cyclin-dependent kinase 2/cyclin E	CCNE2 CDK2 CCNE1	O96020 P24941 P24864	CHEMBL2094126	Other cytosolic protein	0.118883	109 / 0
Chaihu	MOL004653	Cyclin-dependent kinase 1/cyclin B	CCNB3 CDK1 CCNB1 CCNB2	Q8WWL7 P06493 P14635 O95067	CHEMBL2094127	Other cytosolic protein	0.118883	102 / 0
Chaihu	MOL004653	Dopamine D4 receptor	DRD4	P21917	CHEMBL219	Family A G protein-coupled receptor	0.118883	215 / 0
Chaihu	MOL004653	Anandamide amidohydrolase	FAAH	O00519	CHEMBL2243	Enzyme	0.118883	261 / 0
Chaihu	MOL004653	Cyclooxygenase-2	PTGS2	P35354	CHEMBL230	Oxidoreductase	0.118883	576 / 0
Chaihu	MOL004653	Caspase-3	CASP3	P42574	CHEMBL2334	Protease	0.118883	130 / 0
Chaihu	MOL004653	Metabotropic glutamate receptor 4	GRM4	Q14833	CHEMBL2736	Family C G protein-coupled receptor	0.118883	115 / 0
Chaihu	MOL004653	Matrix metalloproteinase 3	MMP3	P08254	CHEMBL283	Protease	0.118883	39 / 0
Chaihu	MOL004653	Phosphodiesterase 7A	PDE7A	Q13946	CHEMBL3012	Phosphodiesterase	0.118883	109 / 0
Chaihu	MOL004653	Matrix metalloproteinase 1	MMP1	P03956	CHEMBL332	Protease	0.118883	67 / 0
Chaihu	MOL004653	Caspase-7	CASP7	P55210	CHEMBL3468	Protease	0.118883	76 / 0
Chaihu	MOL004653	Nitric-oxide synthase, brain	NOS1	P29475	CHEMBL3568	Enzyme	0.118883	76 / 0
Chaihu	MOL004653	Phosphodiesterase 10A (by homology)	PDE10A	Q9Y233	CHEMBL4409	Phosphodiesterase	0.118883	1601 / 0
Chaihu	MOL004653	Vanilloid receptor	TRPV1	Q8NER1	CHEMBL4794	Voltage-gated ion channel	0.118883	423 / 0
Chaihu	MOL004653	Cytochrome P450 11B1	CYP11B1	P15538	CHEMBL1908	Cytochrome P450	0.118883	211 / 0
Chaihu	MOL004653	Cytochrome P450 19A1	CYP19A1	P11511	CHEMBL1978	Cytochrome P450	0.118883	337 / 0
Chaihu	MOL004653	Gamma-secretase	PSEN2 PSENEN NCSTN APH1A PSEN1 APH1B	P49810 Q9NZ42 Q92542 Q96BI3 P49768 Q8WW43	CHEMBL2094135	Protease	0.118883	331 / 0
Chaihu	MOL004653	Cytochrome P450 11B2	CYP11B2	P19099	CHEMBL2722	Cytochrome P450	0.118883	225 / 0
Chaihu	MOL004653	Muscarinic acetylcholine receptor M4	CHRM4	P08173	CHEMBL1821	Family A G protein-coupled receptor	0.118883	38 / 0
Chaihu	MOL004653	Protein kinase C gamma (by homology)	PRKCG	P05129	CHEMBL2938	Kinase	0.118883	52 / 0
Chaihu	MOL004653	Prolyl endopeptidase	PREP	P48147	CHEMBL3202	Protease	0.118883	133 / 0
Chaihu	MOL004653	Proteasome Macropain subunit MB1	PSMB5	P28074	CHEMBL4662	Protease	0.118883	28 / 0
Chaihu	MOL004653	SUMO-activating enzyme	SAE1 UBA2	Q9UBE0 Q9UBT2	CHEMBL2095174	Enzyme	0.118883	14 / 0
Chaihu	MOL004653	PI3-kinase p110-delta subunit	PIK3CD	O00329	CHEMBL3130	Enzyme	0.118883	230 / 0
Chaihu	MOL004653	PI3-kinase p110-beta subunit	PIK3CB	P42338	CHEMBL3145	Enzyme	0.118883	141 / 0
Chaihu	MOL004653	PI3-kinase p110-gamma subunit	PIK3CG	P48736	CHEMBL3267	Enzyme	0.118883	167 / 0
Chaihu	MOL004653	6-phosphofructo-2-kinase/fructose-2,6-bisphosphatase 3	PFKFB3	Q16875	CHEMBL2331053	Enzyme	0.118883	162 / 0
Chaihu	MOL004653	Hexokinase type IV	GCK	P35557	CHEMBL3820	Enzyme	0.118883	162 / 0
Chaihu	MOL004653	Cathepsin (B and K)	CTSB	P07858	CHEMBL4072	Protease	0.118883	222 / 0
Chaihu	MOL004653	Focal adhesion kinase 1	PTK2	Q05397	CHEMBL2695	Kinase	0.118883	132 / 0
Chaihu	MOL004653	Cholecystokinin B receptor	CCKBR	P32239	CHEMBL298	Family A G protein-coupled receptor	0.118883	392 / 0
Chaihu	MOL004653	Metabotropic glutamate receptor 2 (by homology)	GRM2	Q14416	CHEMBL5137	Family C G protein-coupled receptor	0.118883	79 / 0
Chaihu	MOL004653	Receptor protein-tyrosine kinase erbB-2	ERBB2	P04626	CHEMBL1824	Kinase	0.118883	153 / 0
Chaihu	MOL004653	Cyclin-dependent kinase 2/cyclin A	CDK2 CCNA1 CCNA2	P24941 P78396 P20248	CHEMBL2094128	Other cytosolic protein	0.118883	131 / 0
Chaihu	MOL004653	CDC7/DBF4 (Cell division cycle 7-related protein kinase/Activator of S phase kinase)	DBF4 CDC7	Q9UBU7 O00311	CHEMBL2111377	Kinase	0.118883	45 / 0
Chaihu	MOL000098	NADPH oxidase 4	NOX4	Q9NPH5	CHEMBL1250375	Enzyme	1	7 / 8
Chaihu	MOL000098	Vasopressin V2 receptor	AVPR2	P30518	CHEMBL1790	Family A G protein-coupled receptor	1	1 / 1
Chaihu	MOL000098	Aldose reductase	AKR1B1	P15121	CHEMBL1900	Enzyme	1	18 / 72
Chaihu	MOL000098	Xanthine dehydrogenase	XDH	P47989	CHEMBL1929	Oxidoreductase	1	12 / 20
Chaihu	MOL000098	Monoamine oxidase A	MAOA	P21397	CHEMBL1951	Oxidoreductase	1	4 / 14
Chaihu	MOL000098	Insulin-like growth factor I receptor	IGF1R	P08069	CHEMBL1957	Kinase	1	3 / 3
Chaihu	MOL000098	Tyrosine-protein kinase receptor FLT3	FLT3	P36888	CHEMBL1974	Kinase	1	5 / 7
Chaihu	MOL000098	Cytochrome P450 19A1	CYP19A1	P11511	CHEMBL1978	Cytochrome P450	1	5 / 18
Chaihu	MOL000098	Epidermal growth factor receptor erbB1	EGFR	P00533	CHEMBL203	Kinase	1	5 / 28
Chaihu	MOL000098	Thrombin	F2	P00734	CHEMBL204	Protease	1	11 / 3
Chaihu	MOL000098	Carbonic anhydrase II	CA2	P00918	CHEMBL205	Lyase	1	7 / 15
Chaihu	MOL000098	Serine/threonine-protein kinase PIM1	PIM1	P11309	CHEMBL2147	Kinase	1	7 / 7
Chaihu	MOL000098	Arachidonate 5-lipoxygenase	ALOX5	P09917	CHEMBL215	Oxidoreductase	1	5 / 46
Chaihu	MOL000098	Serine/threonine-protein kinase Aurora-B	AURKB	Q96GD4	CHEMBL2185	Kinase	1	3 / 4
Chaihu	MOL000098	Dopamine D4 receptor	DRD4	P21917	CHEMBL219	Family A G protein-coupled receptor	1	1 / 1
Chaihu	MOL000098	Adenosine A1 receptor (by homology)	ADORA1	P30542	CHEMBL226	Family A G protein-coupled receptor	1	6 / 23
Chaihu	MOL000098	Carbonic anhydrase VII	CA7	P43166	CHEMBL2326	Lyase	1	8 / 14
Chaihu	MOL000098	Glyoxalase I	GLO1	Q04760	CHEMBL2424	Enzyme	1	3 / 4
Chaihu	MOL000098	Myeloperoxidase	MPO	P05164	CHEMBL2439	Enzyme	1	1 / 1
Chaihu	MOL000098	PI3-kinase p85-alpha subunit	PIK3R1	P27986	CHEMBL2506	Enzyme	1	1 / 1
Chaihu	MOL000098	Adenosine A2a receptor (by homology)	ADORA2A	P29274	CHEMBL251	Family A G protein-coupled receptor	1	5 / 11
Chaihu	MOL000098	Death-associated protein kinase 1	DAPK1	P53355	CHEMBL2558	Kinase	1	2 / 2
Chaihu	MOL000098	Liver glycogen phosphorylase	PYGL	P06737	CHEMBL2568	Enzyme	1	1 / 1
Chaihu	MOL000098	Carbonic anhydrase I	CA1	P00915	CHEMBL261	Lyase	1	3 / 5
Chaihu	MOL000098	Glycogen synthase kinase-3 beta	GSK3B	P49841	CHEMBL262	Kinase	1	3 / 6
Chaihu	MOL000098	Tyrosine-protein kinase SRC	SRC	P12931	CHEMBL267	Kinase	1	2 / 10
Chaihu	MOL000098	Focal adhesion kinase 1	PTK2	Q05397	CHEMBL2695	Kinase	1	1 / 2
Chaihu	MOL000098	Estradiol 17-beta-dehydrogenase 2	HSD17B2	P37059	CHEMBL2789	Enzyme	1	8 / 3
Chaihu	MOL000098	Vascular endothelial growth factor receptor 2	KDR	P35968	CHEMBL279	Kinase	1	2 / 3
Chaihu	MOL000098	Matrix metalloproteinase 13	MMP13	P45452	CHEMBL280	Protease	1	1 / 1
Chaihu	MOL000098	Matrix metalloproteinase 3	MMP3	P08254	CHEMBL283	Protease	1	1 / 1
Chaihu	MOL000098	Carbonic anhydrase III	CA3	P07451	CHEMBL2885	Lyase	1	1 / 1
Chaihu	MOL000098	Arachidonate 15-lipoxygenase	ALOX15	P16050	CHEMBL2903	Enzyme	1	4 / 8
Chaihu	MOL000098	Multidrug resistance-associated protein 1	ABCC1	P33527	CHEMBL3004	Primary active transporter	1	7 / 11
Chaihu	MOL000098	Serine/threonine-protein kinase PLK1	PLK1	P53350	CHEMBL3024	Kinase	1	2 / 3
Chaihu	MOL000098	Carbonic anhydrase VI	CA6	P23280	CHEMBL3025	Lyase	1	1 / 1
Chaihu	MOL000098	Cyclin-dependent kinase 1	CDK1	P06493	CHEMBL308	Kinase	1	2 / 13
Chaihu	MOL000098	Matrix metalloproteinase 9	MMP9	P14780	CHEMBL321	Protease	1	2 / 2
Chaihu	MOL000098	Carbonic anhydrase XII	CA12	O43570	CHEMBL3242	Lyase	1	8 / 17
Chaihu	MOL000098	Matrix metalloproteinase 2	MMP2	P08253	CHEMBL333	Protease	1	2 / 2
Chaihu	MOL000098	Protein kinase N1	PKN1	Q16512	CHEMBL3384	Kinase	1	1 / 3
Chaihu	MOL000098	Carbonic anhydrase XIV	CA14	Q9ULX7	CHEMBL3510	Lyase	1	1 / 1
Chaihu	MOL000098	Carbonic anhydrase IX	CA9	Q16790	CHEMBL3594	Lyase	1	3 / 5
Chaihu	MOL000098	Casein kinase II alpha	CSNK2A1	P68400	CHEMBL3629	Kinase	1	3 / 2
Chaihu	MOL000098	Arachidonate 12-lipoxygenase	ALOX12	P18054	CHEMBL3687	Enzyme	1	5 / 10
Chaihu	MOL000098	Hepatocyte growth factor receptor	MET	P08581	CHEMBL3717	Kinase	1	2 / 4
Chaihu	MOL000098	Carbonic anhydrase IV	CA4	P22748	CHEMBL3729	Lyase	1	7 / 13
Chaihu	MOL000098	Serine/threonine-protein kinase NEK2	NEK2	P51955	CHEMBL3835	Kinase	1	1 / 2
Chaihu	MOL000098	Interleukin-8 receptor A	CXCR1	P25024	CHEMBL4029	Family A G protein-coupled receptor	1	1 / 1
Chaihu	MOL000098	CaM kinase II beta	CAMK2B	Q13554	CHEMBL4121	Kinase	1	1 / 2
Chaihu	MOL000098	ALK tyrosine kinase receptor	ALK	Q9UM73	CHEMBL4247	Kinase	1	2 / 4
Chaihu	MOL000098	Serine/threonine-protein kinase AKT	AKT1	P31749	CHEMBL4282	Kinase	1	1 / 4
Chaihu	MOL000098	P-glycoprotein 1	ABCB1	P08183	CHEMBL4302	Primary active transporter	1	11 / 48
Chaihu	MOL000098	Serine/threonine-protein kinase NEK6	NEK6	Q9HC98	CHEMBL4309	Kinase	1	1 / 2
Chaihu	MOL000098	Phospholipase A2 group 1B	PLA2G1B	P04054	CHEMBL4426	Enzyme	1	1 / 1
Chaihu	MOL000098	Carbonic anhydrase VA	CA5A	P35218	CHEMBL4789	Lyase	1	1 / 1
Chaihu	MOL000098	Beta-secretase 1	BACE1	P56817	CHEMBL4822	Protease	1	8 / 14
Chaihu	MOL000098	Cytochrome P450 1B1	CYP1B1	Q16678	CHEMBL4878	Cytochrome P450	1	12 / 46
Chaihu	MOL000098	Tyrosine-protein kinase receptor UFO	AXL	P30530	CHEMBL4895	Kinase	1	2 / 4
Chaihu	MOL000098	ATP-binding cassette sub-family G member 2	ABCG2	Q9UNQ0	CHEMBL5393	Primary active transporter	1	6 / 50
Chaihu	MOL000098	NUAK family SNF1-like kinase 1	NUAK1	O60285	CHEMBL5784	Kinase	1	1 / 2
Chaihu	MOL000098	Aldo-keto reductase family 1 member C2 (by homology)	AKR1C2	P52895	CHEMBL5847	Enzyme	1	1 / 1
Chaihu	MOL000098	Aldo-keto reductase family 1 member C1 (by homology)	AKR1C1	Q04828	CHEMBL5905	Enzyme	1	1 / 1
Chaihu	MOL000098	Aldo-keto-reductase family 1 member C3 (by homology)	AKR1C3	P42330	CHEMBL4681	Enzyme	1	1 / 1
Chaihu	MOL000098	Aldo-keto reductase family 1 member C4 (by homology)	AKR1C4	P17516	CHEMBL4999	Enzyme	1	1 / 1
Chaihu	MOL000098	Carbonic anhydrase XIII (by homology)	CA13	Q8N1Q1	CHEMBL3912	Lyase	1	1 / 1
Chaihu	MOL000098	Aldehyde reductase (by homology)	AKR1A1	P14550	CHEMBL2246	Enzyme	1	1 / 1
Chaihu	MOL000098	G-protein coupled receptor 35	GPR35	Q9HC97	CHEMBL1293267	Family A G protein-coupled receptor	1	2 / 4
Chaihu	MOL000098	Microtubule-associated protein tau	MAPT	P10636	CHEMBL1293224	Unclassified protein	0.680284	1 / 1
Chaihu	MOL000098	Lysine-specific demethylase 4D-like	KDM4E	B2RXH2	CHEMBL1293226	Eraser	0.680284	2 / 2
Chaihu	MOL000098	DNA topoisomerase II alpha	TOP2A	P11388	CHEMBL1806	Isomerase	0.680284	1 / 1
Chaihu	MOL000098	Insulin receptor	INSR	P06213	CHEMBL1981	Kinase	0.680284	1 / 1
Chaihu	MOL000098	Acetylcholinesterase	ACHE	P22303	CHEMBL220	Hydrolase	0.680284	4 / 27
Chaihu	MOL000098	Myosin light chain kinase, smooth muscle	MYLK	Q15746	CHEMBL2428	Kinase	0.680284	1 / 1
Chaihu	MOL000098	Tyrosine-protein kinase SYK	SYK	P43405	CHEMBL2599	Kinase	0.680284	3 / 3
Chaihu	MOL000098	PI3-kinase p110-gamma subunit	PIK3CG	P48736	CHEMBL3267	Enzyme	0.680284	3 / 1
Chaihu	MOL000098	DNA-(apurinic or apyrimidinic site) lyase	APEX1	P27695	CHEMBL5619	Enzyme	0.680284	1 / 1
Chaihu	MOL000098	Receptor-type tyrosine-protein phosphatase S	PTPRS	Q13332	CHEMBL2396508	Phosphatase	0.545872	6 / 8
Chaihu	MOL000098	Estrogen receptor beta	ESR2	Q92731	CHEMBL242	Nuclear receptor	0.545872	62 / 29
Chaihu	MOL000098	DNA-3-methyladenine glycosylase	MPG	P29372	CHEMBL3396943	Enzyme	0.545872	1 / 1
Chaihu	MOL000098	Solute carrier family 22 member 12	SLC22A12	Q96S37	CHEMBL6120	Electrochemical transporter	0.545872	4 / 1
Chaihu	MOL000098	Cyclin-dependent kinase 5/CDK5 activator 1	CDK5R1 CDK5	Q15078 Q00535	CHEMBL1907600	Kinase	0.538062	6 / 18
Chaihu	MOL000098	Cyclin-dependent kinase 1/cyclin B	CCNB3 CDK1 CCNB1 CCNB2	Q8WWL7 P06493 P14635 O95067	CHEMBL2094127	Other cytosolic protein	0.538062	4 / 9
Chaihu	MOL000098	Arginase-1 (by homology)	ARG1	P05089	CHEMBL1075097	Enzyme	0.538062	2 / 2
Chaihu	MOL000098	Cyclin-dependent kinase 6	CDK6	Q00534	CHEMBL2508	Kinase	0.498513	3 / 4
Chaihu	MOL000098	Cyclin-dependent kinase 2	CDK2	P24941	CHEMBL301	Kinase	0.498513	1 / 17
Chaihu	MOL000098	Tyrosinase	TYR	P14679	CHEMBL1973	Oxidoreductase	0.395895	2 / 3
Chaihu	MOL000098	Estradiol 17-beta-dehydrogenase 1	HSD17B1	P14061	CHEMBL3181	Enzyme	0.395895	8 / 4
Chaihu	MOL000098	Aryl hydrocarbon receptor	AHR	P35869	CHEMBL3201	Transcription factor	0.395895	1 / 1
Chaihu	MOL000098	Estrogen-related receptor alpha	ESRRA	P11474	CHEMBL3429	Nuclear receptor	0.395895	2 / 2
Chaihu	MOL000098	Beta amyloid A4 protein	APP	P05067	CHEMBL2487	Membrane receptor	0.26156	2 / 12
Chaihu	MOL000098	Poly [ADP-ribose] polymerase-1	PARP1	P09874	CHEMBL3105	Enzyme	0.26156	3 / 9
Chaihu	MOL000098	Transthyretin	TTR	P02766	CHEMBL3194	Secreted protein	0.26156	2 / 2
Chaihu	MOL000098	Matrix metalloproteinase 12	MMP12	P39900	CHEMBL4393	Protease	0.26156	1 / 1
Chaihu	MOL000098	Lymphocyte differentiation antigen CD38	CD38	P28907	CHEMBL4660	Enzyme	0.26156	2 / 3
Chaihu	MOL000098	Aldo-keto reductase family 1 member B10	AKR1B10	O60218	CHEMBL5983	Enzyme	0.26156	2 / 3
Chaihu	MOL000098	Tankyrase-2	TNKS2	Q9H2K2	CHEMBL6154	Enzyme	0.26156	4 / 12
Chaihu	MOL000098	Tankyrase-1	TNKS	O95271	CHEMBL6164	Enzyme	0.26156	4 / 28
Chaihu	MOL000098	DNA topoisomerase I (by homology)	TOP1	P11387	CHEMBL1781	Isomerase	0.26156	1 / 1
Chaihu	MOL000098	Telomerase reverse transcriptase	TERT	O14746	CHEMBL2916	Enzyme	0.198389	9 / 22
Baishao	MOL001919	Androgen Receptor	AR	P10275	CHEMBL1871	Nuclear receptor	0.10934	148 / 65
Baishao	MOL001919	Cytochrome P450 19A1	CYP19A1	P11511	CHEMBL1978	Cytochrome P450	0.10934	59 / 131
Baishao	MOL001919	Testis-specific androgen-binding protein	SHBG	P04278	CHEMBL3305	Secreted protein	0.10934	58 / 32
Baishao	MOL001919	Glucocorticoid receptor	NR3C1	P04150	CHEMBL2034	Nuclear receptor	0.10934	119 / 31
Baishao	MOL001919	GABA-B receptor (by homology)	GABBR1	Q9UBS5	CHEMBL2064	Family C G protein-coupled receptor	0.10934	5 / 0
Baishao	MOL001919	Hydroxyacid oxidase 1	HAO1	Q9UJM8	CHEMBL4229	Enzyme	0.10934	0 / 1
Baishao	MOL001919	Beta-galactoside alpha-2,6-sialyltransferase 1	ST6GAL1	P15907	CHEMBL3596075	Transferase	0.10934	1 / 0
Baishao	MOL001919	Estrogen receptor alpha	ESR1	P03372	CHEMBL206	Nuclear receptor	0.10934	67 / 9
Baishao	MOL001919	Muscarinic acetylcholine receptor M1 (by homology)	CHRM1	P11229	CHEMBL216	Family A G protein-coupled receptor	0.10934	25 / 0
Baishao	MOL001919	Tyrosine-protein kinase JAK1	JAK1	P23458	CHEMBL2835	Kinase	0.10934	53 / 0
Baishao	MOL001919	Tyrosine-protein kinase JAK2	JAK2	O60674	CHEMBL2971	Kinase	0.10934	43 / 0
baishao	MOL001919	Vanilloid receptor	TRPV1	Q8NER1	CHEMBL4794	Voltage-gated ion channel	0	25 / 0
baishao	MOL001919	Progesterone receptor	PGR	P06401	CHEMBL208	Nuclear receptor	0	30 / 26
baishao	MOL001919	Gamma-secretase	PSEN2 PSENEN NCSTN APH1A PSEN1 APH1B	P49810 Q9NZ42 Q92542 Q96BI3 P49768 Q8WW43	CHEMBL2094135	Protease	0	65 / 0
baishao	MOL001919	Cytochrome P450 2D6	CYP2D6	P10635	CHEMBL289	Cytochrome P450	0	4 / 0
baishao	MOL001919	Cytochrome P450 2C9	CYP2C9	P11712	CHEMBL3397	Cytochrome P450	0	3 / 0
baishao	MOL001919	Tyrosine-protein kinase JAK3	JAK3	P52333	CHEMBL2148	Kinase	0	57 / 0
baishao	MOL001919	Tyrosine-protein kinase TYK2	TYK2	P29597	CHEMBL3553	Kinase	0	18 / 0
baishao	MOL001919	Delta opioid receptor (by homology)	OPRD1	P41143	CHEMBL236	Family A G protein-coupled receptor	0	68 / 0
baishao	MOL001919	Kappa Opioid receptor (by homology)	OPRK1	P41145	CHEMBL237	Family A G protein-coupled receptor	0	60 / 0
baishao	MOL001919	Serine/threonine-protein kinase PIM1	PIM1	P11309	CHEMBL2147	Kinase	0	10 / 0
baishao	MOL001919	Serotonin 1a (5-HT1a) receptor	HTR1A	P08908	CHEMBL214	Family A G protein-coupled receptor	0	9 / 0
baishao	MOL001919	Serine/threonine-protein kinase PIM3	PIM3	Q86V86	CHEMBL5407	Kinase	0	3 / 0
baishao	MOL001919	Steryl-sulfatase	STS	P08842	CHEMBL3559	Enzyme	0	15 / 0
baishao	MOL001919	Poly [ADP-ribose] polymerase-1	PARP1	P09874	CHEMBL3105	Enzyme	0	18 / 0
baishao	MOL001919	c-Jun N-terminal kinase 1	MAPK8	P45983	CHEMBL2276	Kinase	0	7 / 0
baishao	MOL001919	Glycogen synthase kinase-3 beta	GSK3B	P49841	CHEMBL262	Kinase	0	16 / 0
baishao	MOL001919	c-Jun N-terminal kinase 3	MAPK10	P53779	CHEMBL2637	Kinase	0	7 / 0
baishao	MOL001919	Dual specificity mitogen-activated protein kinase kinase 4	MAP2K4	P45985	CHEMBL2897	Kinase	0	1 / 0
baishao	MOL001919	MAP kinase p38 delta	MAPK13	O15264	CHEMBL2939	Kinase	0	1 / 0
baishao	MOL001919	Cyclin-dependent kinase 2	CDK2	P24941	CHEMBL301	Kinase	0	18 / 0
baishao	MOL001919	Dual specificity mitogen-activated protein kinase kinase 7	MAP2K7	O14733	CHEMBL3530	Kinase	0	1 / 0
baishao	MOL001919	c-Jun N-terminal kinase 2	MAPK9	P45984	CHEMBL4179	Kinase	0	4 / 0
baishao	MOL001919	MAP kinase p38 gamma	MAPK12	P53778	CHEMBL4674	Kinase	0	1 / 0
baishao	MOL001919	Estradiol 17-beta-dehydrogenase 1	HSD17B1	P14061	CHEMBL3181	Enzyme	0	8 / 0
baishao	MOL001919	Fatty acid synthase	FASN	P49327	CHEMBL4158	Transferase	0	3 / 0
baishao	MOL001919	Kinesin-like protein 1	KIF11	P52732	CHEMBL4581	Other cytosolic protein	0	4 / 0
baishao	MOL001919	CDC7/DBF4 (Cell division cycle 7-related protein kinase/Activator of S phase kinase)	CDC7	O00311	CHEMBL5443	Kinase	0	4 / 0
baishao	MOL001919	Interleukin-6 receptor subunit beta	IL6ST	P40189	CHEMBL3124734	Membrane receptor	0	3 / 0
baishao	MOL001919	Estrogen receptor beta	ESR2	Q92731	CHEMBL242	Nuclear receptor	0	69 / 12
baishao	MOL001919	Cytochrome P450 11B1	CYP11B1	P15538	CHEMBL1908	Cytochrome P450	0	17 / 0
baishao	MOL001919	Catechol O-methyltransferase	COMT	P21964	CHEMBL2023	Transferase	0	2 / 0
baishao	MOL001919	C-C chemokine receptor type 1	CCR1	P32246	CHEMBL2413	Family A G protein-coupled receptor	0	70 / 0
baishao	MOL001919	Cytochrome P450 11B2	CYP11B2	P19099	CHEMBL2722	Cytochrome P450	0	17 / 0
baishao	MOL001919	Neuropeptide Y receptor type 5	NPY5R	Q15761	CHEMBL4561	Family A G protein-coupled receptor	0	8 / 0
baishao	MOL001919	Rho-associated protein kinase 2	ROCK2	O75116	CHEMBL2973	Kinase	0	15 / 0
baishao	MOL001919	Estrogen-related receptor alpha	ESRRA	P11474	CHEMBL3429	Nuclear receptor	0	1 / 0
baishao	MOL001919	Estrogen-related receptor beta	ESRRB	O95718	CHEMBL3751	Nuclear receptor	0	1 / 0
baishao	MOL001919	G-protein coupled estrogen receptor 1	GPER1	Q99527	CHEMBL5872	Family A G protein-coupled receptor	0	1 / 0
baishao	MOL001919	Mineralocorticoid receptor	NR3C2	P08235	CHEMBL1994	Nuclear receptor	0	6 / 18
baishao	MOL001919	Serine/threonine-protein kinase RIPK2	RIPK2	O43353	CHEMBL5014	Kinase	0	1 / 0
baishao	MOL001919	Muscarinic acetylcholine receptor M2	CHRM2	P08172	CHEMBL211	Family A G protein-coupled receptor	0	20 / 0
baishao	MOL001919	Thyroid hormone receptor alpha	THRA	P10827	CHEMBL1860	Nuclear receptor	0	1 / 0
baishao	MOL001919	Dipeptidyl peptidase IV	DPP4	P27487	CHEMBL284	Protease	0	23 / 0
baishao	MOL001919	dUTP pyrophosphatase	DUT	P33316	CHEMBL5203	Enzyme	0	6 / 0
baishao	MOL001919	Norepinephrine transporter	SLC6A2	P23975	CHEMBL222	Electrochemical transporter	0	170 / 0
baishao	MOL001919	Endothelin receptor ET-A (by homology)	EDNRA	P25101	CHEMBL252	Family A G protein-coupled receptor	0	8 / 0
baishao	MOL001919	Thrombin and coagulation factor X	F10	P00742	CHEMBL244	Protease	0	9 / 0
baishao	MOL001919	CaM kinase II	CAMK2D	Q13557	CHEMBL2801	Kinase	0	1 / 0
baishao	MOL001919	Thromboxane A2 receptor (by homology)	TBXA2R	P21731	CHEMBL2069	Family A G protein-coupled receptor	0	1 / 0
baishao	MOL001919	Cytochrome P450 17A1	CYP17A1	P05093	CHEMBL3522	Cytochrome P450	0	88 / 14
baishao	MOL001919	Cyclin-dependent kinase 1/cyclin B	CCNB3 CDK1 CCNB1 CCNB2	Q8WWL7 P06493 P14635 O95067	CHEMBL2094127	Other cytosolic protein	0	2 / 0
baishao	MOL001919	Cyclin-dependent kinase 1	CDK1	P06493	CHEMBL308	Kinase	0	17 / 0
baishao	MOL001919	Period circadian protein homolog 2	PER2	O15055	CHEMBL3751648	Unclassified protein	0	9 / 0
baishao	MOL001919	Histone deacetylase 6	HDAC6	Q9UBN7	CHEMBL1865	Eraser	0	17 / 0
baishao	MOL001919	Carbonic anhydrase II	CA2	P00918	CHEMBL205	Lyase	0	7 / 0
baishao	MOL001919	Carbonic anhydrase I	CA1	P00915	CHEMBL261	Lyase	0	8 / 0
baishao	MOL001919	Carbonic anhydrase VI	CA6	P23280	CHEMBL3025	Lyase	0	4 / 0
baishao	MOL001919	Carbonic anhydrase IV	CA4	P22748	CHEMBL3729	Lyase	0	5 / 0
baishao	MOL001919	Serine/threonine-protein kinase PIM2	PIM2	Q9P1W9	CHEMBL4523	Kinase	0	6 / 0
baishao	MOL001919	Heat shock protein HSP 90-beta	HSP90AB1	P08238	CHEMBL4303	Other cytosolic protein	0	5 / 0
baishao	MOL001919	P2X purinoceptor 3	P2RX3	P56373	CHEMBL2998	Ligand-gated ion channel	0	5 / 0
baishao	MOL001919	Potassium channel subfamily K member 3	KCNK3	O14649	CHEMBL2321613	Voltage-gated ion channel	0	17 / 0
baishao	MOL001919	DNA topoisomerase II alpha	TOP2A	P11388	CHEMBL1806	Isomerase	0	0 / 1
baishao	MOL001919	GABA-A receptor; alpha-3/beta-3/gamma-2	GABRB3 GABRA3 GABRG2	P28472 P34903 P18507	CHEMBL2094120	Ligand-gated ion channel	0	2 / 0
baishao	MOL001919	GABA-A receptor; alpha-1/beta-3/gamma-2	GABRB3 GABRG2 GABRA1	P28472 P18507 P14867	CHEMBL2094121	Ligand-gated ion channel	0	2 / 0
baishao	MOL001919	GABA-A receptor; alpha-5/beta-3/gamma-2	GABRB3 GABRG2 GABRA5	P28472 P18507 P31644	CHEMBL2094122	Ligand-gated ion channel	0	2 / 0
baishao	MOL001919	GABA-A receptor; alpha-2/beta-3/gamma-2	GABRA2 GABRB3 GABRG2	P47869 P28472 P18507	CHEMBL2094130	Ligand-gated ion channel	0	2 / 0
baishao	MOL001919	Mitogen-activated protein kinase kinase kinase 5	MAP3K5	Q99683	CHEMBL5285	Kinase	0	6 / 0
baishao	MOL001919	Cannabinoid receptor 2	CNR2	P34972	CHEMBL253	Family A G protein-coupled receptor	0	18 / 0
baishao	MOL001919	Phosphodiesterase 10A	PDE10A	Q9Y233	CHEMBL4409	Phosphodiesterase	0	48 / 0
baishao	MOL001919	Tyrosine-protein kinase receptor TYRO3	TYRO3	Q06418	CHEMBL5314	Kinase	0	2 / 0
baishao	MOL001919	Type-1 angiotensin II receptor (by homology)	AGTR1	P30556	CHEMBL227	Family A G protein-coupled receptor	0	9 / 0
baishao	MOL001919	DNA-dependent protein kinase	PRKDC	P78527	CHEMBL3142	Kinase	0	9 / 0
baishao	MOL001919	Vasopressin V1a receptor	AVPR1A	P37288	CHEMBL1889	Family A G protein-coupled receptor	0	4 / 0
baishao	MOL001919	Sodium channel protein type V alpha subunit	SCN5A	Q14524	CHEMBL1980	Voltage-gated ion channel	0	4 / 0
baishao	MOL001919	Glucagon receptor	GCGR	P47871	CHEMBL1985	Family B G protein-coupled receptor	0	10 / 0
baishao	MOL001919	Cannabinoid receptor 1	CNR1	P21554	CHEMBL218	Family A G protein-coupled receptor	0	13 / 0
baishao	MOL001919	HERG	KCNH2	Q12809	CHEMBL240	Voltage-gated ion channel	0	46 / 0
baishao	MOL001919	Potassium-transporting ATPase alpha chain 2	ATP12A	P54707	CHEMBL2933	Primary active transporter	0	1 / 0
baishao	MOL001919	Rho-associated protein kinase 1	ROCK1	Q13464	CHEMBL3231	Kinase	0	5 / 0
baishao	MOL001919	Sodium channel protein type IX alpha subunit	SCN9A	Q15858	CHEMBL4296	Voltage-gated ion channel	0	6 / 0
baishao	MOL001919	Lysine-specific histone demethylase 1	KDM1A	O60341	CHEMBL6136	Eraser	0	1 / 0
baishao	MOL001919	Telomerase reverse transcriptase	TERT	O14746	CHEMBL2916	Enzyme	0	0 / 2
baishao	MOL001919	Protein-tyrosine phosphatase 2C	PTPN11	Q06124	CHEMBL3864	Phosphatase	0	0 / 2
baishao	MOL001919	Toll-like receptor (TLR7/TLR9)	TLR9	Q9NR96	CHEMBL5804	Toll-like and Il-1 receptors	0	0 / 1
baishao	MOL001919	Heat shock factor protein 1	HSF1	Q00613	CHEMBL5869	Other cytosolic protein	0	0 / 1
baishao	MOL001919	Nerve growth factor receptor Trk-A	NTRK1	P04629	CHEMBL2815	Kinase	0	22 / 0
baishao	MOL001919	Protein kinase C gamma	PRKCG	P05129	CHEMBL2938	Kinase	0	10 / 0
baishao	MOL001919	Protein kinase C delta	PRKCD	Q05655	CHEMBL2996	Kinase	0	8 / 0
Baishao	MOL000211	DNA polymerase beta (by homology)	POLB	P06746	CHEMBL2392	Enzyme	0.971606	6 / 7
Baishao	MOL000211	Aldo-keto reductase family 1 member B10	AKR1B10	O60218	CHEMBL5983	Enzyme	0.971606	6 / 7
Baishao	MOL000211	SUMO-activating enzyme	SAE1 UBA2	Q9UBE0 Q9UBT2	CHEMBL2095174	Enzyme	0.812695	2 / 1
Baishao	MOL000211	11-beta-hydroxysteroid dehydrogenase 1	HSD11B1	P28845	CHEMBL4235	Enzyme	0.704017	33 / 41
Baishao	MOL000211	Protein-tyrosine phosphatase 1B	PTPN1	P18031	CHEMBL335	Phosphatase	0.528016	53 / 45
Baishao	MOL000211	Prostaglandin E synthase	PTGES	O14684	CHEMBL5658	Enzyme	0.150917	26 / 12
Baishao	MOL000211	Bile acid receptor FXR	NR1H4	Q96RI1	CHEMBL2047	Nuclear receptor	0.142507	21 / 11
Baishao	MOL000211	T-cell protein-tyrosine phosphatase	PTPN2	P17706	CHEMBL3807	Phosphatase	0.109013	16 / 13
Baishao	MOL000211	Dual specificity phosphatase Cdc25C	CDC25C	P30307	CHEMBL2378	Phosphatase	0.109013	0 / 1
Baishao	MOL000211	G-protein coupled bile acid receptor 1	GPBAR1	Q8TDU6	CHEMBL5409	Family A G protein-coupled receptor	0.100634	13 / 16
Baishao	MOL000211	DNA topoisomerase II alpha	TOP2A	P11388	CHEMBL1806	Isomerase	0.100634	1 / 2
Baishao	MOL000211	Androgen Receptor	AR	P10275	CHEMBL1871	Nuclear receptor	0.100634	5 / 107
Baishao	MOL000211	Nuclear receptor ROR-gamma	RORC	P51449	CHEMBL1741186	Nuclear receptor	0.100634	1 / 9
Baishao	MOL000211	Receptor-type tyrosine-protein phosphatase F (LAR)	PTPRF	P10586	CHEMBL3521	Membrane receptor	0.100634	1 / 1
Baishao	MOL000211	Low molecular weight phosphotyrosine protein phosphatase	ACP1	P24666	CHEMBL4903	Phosphatase	0.100634	1 / 1
Baishao	MOL000211	Phospholipase A2 group 1B	PLA2G1B	P04054	CHEMBL4426	Enzyme	0.100634	1 / 1
Baishao	MOL000211	Dual specificity phosphatase Cdc25B	CDC25B	P30305	CHEMBL4804	Phosphatase	0.100634	3 / 7
Baishao	MOL000211	Carboxylesterase 2	CES2	O00748	CHEMBL3180	Enzyme	0.100634	1 / 12
Baishao	MOL000211	Dual specificity phosphatase Cdc25A	CDC25A	P30304	CHEMBL3775	Phosphatase	0.100634	3 / 17
Baishao	MOL000211	Phosphodiesterase 4D	PDE4D	Q08499	CHEMBL288	Phosphodiesterase	0.100634	2 / 1
Baishao	MOL000211	Fatty acid-binding protein, liver	FABP1	P07148	CHEMBL5421	Fatty acid binding protein family	0.100634	0 / 3
Baishao	MOL000211	UDP-glucuronosyltransferase 2B7	UGT2B7	P16662	CHEMBL4370	Enzyme	0.100634	0 / 26
Baishao	MOL000211	Vitamin D receptor	VDR	P11473	CHEMBL1977	Nuclear receptor	0.100634	5 / 7
Baishao	MOL000211	Acyl-CoA desaturase	SCD	O00767	CHEMBL5555	Enzyme	0.100634	0 / 1
Baishao	MOL000211	Corticosteroid binding globulin	SERPINA6	P08185	CHEMBL2421	Secreted protein	0.100634	0 / 22
Baishao	MOL000211	Testis-specific androgen-binding protein	SHBG	P04278	CHEMBL3305	Secreted protein	0.100634	0 / 57
Baishao	MOL000211	Glucose-6-phosphate 1-dehydrogenase	G6PD	P11413	CHEMBL5347	Enzyme	0.100634	0 / 9
Baishao	MOL000211	Cytochrome P450 51 (by homology)	CYP51A1	Q16850	CHEMBL3849	Cytochrome P450	0.100634	0 / 2
Baishao	MOL000211	Cytochrome P450 19A1	CYP19A1	P11511	CHEMBL1978	Cytochrome P450	0.100634	0 / 167
Baishao	MOL000211	Estradiol 17-beta-dehydrogenase 3	HSD17B3	P37058	CHEMBL4234	Enzyme	0.100634	0 / 12
Baishao	MOL000211	GABA-B receptor (by homology)	GABBR1	Q9UBS5	CHEMBL2064	Family C G protein-coupled receptor	0.100634	0 / 1
Baishao	MOL000211	Peroxisome proliferator-activated receptor gamma	PPARG	P37231	CHEMBL235	Nuclear receptor	0.100634	54 / 12
Baishao	MOL000211	Protein kinase C eta	PRKCH	P24723	CHEMBL3616	Kinase	0.100634	1 / 1
Baishao	MOL000211	11-beta-hydroxysteroid dehydrogenase 2	HSD11B2	P80365	CHEMBL3746	Enzyme	0.100634	7 / 14
Baishao	MOL000211	Protein-tyrosine phosphatase 2C	PTPN11	Q06124	CHEMBL3864	Phosphatase	0.100634	3 / 1
Baishao	MOL000211	DNA topoisomerase I	TOP1	P11387	CHEMBL1781	Isomerase	0.100634	0 / 2
Baishao	MOL000211	Niemann-Pick C1-like protein 1	NPC1L1	Q9UHC9	CHEMBL2027	Other membrane protein	0.100634	0 / 11
Baishao	MOL000211	Sigma opioid receptor	SIGMAR1	Q99720	CHEMBL287	Membrane receptor	0.100634	0 / 3
Baishao	MOL000211	Cytochrome P450 17A1	CYP17A1	P05093	CHEMBL3522	Cytochrome P450	0.100634	0 / 19
Baishao	MOL000211	Telomerase reverse transcriptase	TERT	O14746	CHEMBL2916	Enzyme	0.100634	1 / 1
Baishao	MOL000211	5-lipoxygenase activating protein	ALOX5AP	P20292	CHEMBL4550	Other cytosolic protein	0.100634	22 / 0
Baishao	MOL000211	GABA A receptor alpha-2/beta-2/gamma-2	GABRA2 GABRB2 GABRG2	P47869 P47870 P18507	CHEMBL2111413	Ligand-gated ion channel	0.100634	0 / 1
Baishao	MOL000211	p53-binding protein Mdm-2	MDM2	Q00987	CHEMBL5023	Other nuclear protein	0.100634	22 / 0
Baishao	MOL000211	Protein-tyrosine phosphatase 1C	PTPN6	P29350	CHEMBL3166	Phosphatase	0.100634	1 / 1
Baishao	MOL000211	Cyclooxygenase-2	PTGS2	P35354	CHEMBL230	Oxidoreductase	0.100634	3 / 4
Baishao	MOL000211	Toll-like receptor (TLR7/TLR9)	TLR9	Q9NR96	CHEMBL5804	Toll-like and Il-1 receptors	0.100634	1 / 0
Baishao	MOL000211	Prostanoid EP2 receptor (by homology)	PTGER2	P43116	CHEMBL1881	Family A G protein-coupled receptor	0.100634	58 / 21
Baishao	MOL000211	Fatty acid binding protein intestinal	FABP2	P12104	CHEMBL4879	Fatty acid binding protein family	0.100634	0 / 1
Baishao	MOL000211	Thyroid hormone receptor alpha	THRA	P10827	CHEMBL1860	Nuclear receptor	0.100634	44 / 0
Baishao	MOL000211	Thyroid hormone receptor beta-1	THRB	P10828	CHEMBL1947	Nuclear receptor	0.100634	46 / 0
baishao	MOL000211	LXR-alpha	NR1H3	Q13133	CHEMBL2808	Nuclear receptor	0	1 / 17
baishao	MOL000211	Protein farnesyltransferase	FNTA FNTB	P49354 P49356	CHEMBL2094108	Enzyme	0	19 / 10
baishao	MOL000211	CD81 antigen	CD81	P60033	CHEMBL1075180	Surface antigen	0	1 / 1
baishao	MOL000211	Peroxisome proliferator-activated receptor alpha	PPARA	Q07869	CHEMBL239	Nuclear receptor	0	5 / 13
baishao	MOL000211	Inhibitor of nuclear factor kappa B kinase beta subunit	IKBKB	O14920	CHEMBL1991	Kinase	0	3 / 0
baishao	MOL000211	Glucocorticoid receptor	NR3C1	P04150	CHEMBL2034	Nuclear receptor	0	10 / 26
baishao	MOL000211	Cyclooxygenase-1	PTGS1	P23219	CHEMBL221	Oxidoreductase	0	0 / 3
baishao	MOL000211	Peroxisome proliferator-activated receptor delta	PPARD	Q03181	CHEMBL3979	Nuclear receptor	0	5 / 11
baishao	MOL000211	Prolyl endopeptidase	PREP	P48147	CHEMBL3202	Protease	0	3 / 2
baishao	MOL000211	Nuclear receptor ROR-alpha	RORA	P35398	CHEMBL5868	Nuclear receptor	0	0 / 3
baishao	MOL000211	Type-1 angiotensin II receptor	AGTR1	P30556	CHEMBL227	Family A G protein-coupled receptor	0	38 / 0
baishao	MOL000211	HMG-CoA reductase	HMGCR	P04035	CHEMBL402	Oxidoreductase	0	31 / 15
baishao	MOL000211	Fatty acid binding protein adipocyte	FABP4	P15090	CHEMBL2083	Fatty acid binding protein family	0	5 / 4
baishao	MOL000211	Prostanoid EP1 receptor (by homology)	PTGER1	P34995	CHEMBL1811	Family A G protein-coupled receptor	0	34 / 9
baishao	MOL000211	Anandamide amidohydrolase	FAAH	O00519	CHEMBL2243	Enzyme	0	2 / 5
baishao	MOL000211	Fatty acid binding protein muscle	FABP3	P05413	CHEMBL3344	Fatty acid binding protein family	0	1 / 5
baishao	MOL000211	Fatty acid binding protein epidermal	FABP5	Q01469	CHEMBL3674	Fatty acid binding protein family	0	1 / 2
baishao	MOL000211	Retinoic acid receptor gamma (by homology)	RARG	P13631	CHEMBL2003	Nuclear receptor	0	4 / 0
baishao	MOL000211	Retinoid X receptor gamma (by homology)	RXRG	P48443	CHEMBL2004	Nuclear receptor	0	23 / 0
baishao	MOL000211	Solute carrier family 22 member 6 (by homology)	SLC22A6	Q4U2R8	CHEMBL1641347	Electrochemical transporter	0	0 / 3
baishao	MOL000211	Angiotensin-converting enzyme	ACE	P12821	CHEMBL1808	Protease	0	37 / 3
baishao	MOL000211	Matrix metalloproteinase 3	MMP3	P08254	CHEMBL283	Protease	0	13 / 0
baishao	MOL000211	Matrix metalloproteinase 1	MMP1	P03956	CHEMBL332	Protease	0	7 / 0
baishao	MOL000211	Matrix metalloproteinase 2	MMP2	P08253	CHEMBL333	Protease	0	20 / 0
baishao	MOL000211	Estrogen receptor beta	ESR2	Q92731	CHEMBL242	Nuclear receptor	0	5 / 29
baishao	MOL000211	Endothelin receptor ET-A (by homology)	EDNRA	P25101	CHEMBL252	Family A G protein-coupled receptor	0	25 / 0
baishao	MOL000211	Prostanoid EP4 receptor (by homology)	PTGER4	P35408	CHEMBL1836	Family A G protein-coupled receptor	0	100 / 6
baishao	MOL000211	Nitric oxide synthase, inducible (by homology)	NOS2	P35228	CHEMBL4481	Enzyme	0	8 / 19
baishao	MOL000211	Progesterone receptor	PGR	P06401	CHEMBL208	Nuclear receptor	0	4 / 38
baishao	MOL000211	Retinoid X receptor beta	RXRB	P28702	CHEMBL1870	Nuclear receptor	0	15 / 0
baishao	MOL000211	Retinoic acid receptor beta	RARB	P10826	CHEMBL2008	Nuclear receptor	0	13 / 0
baishao	MOL000211	Retinoic acid receptor alpha	RARA	P10276	CHEMBL2055	Nuclear receptor	0	9 / 0
baishao	MOL000211	Retinoid X receptor alpha	RXRA	P19793	CHEMBL2061	Nuclear receptor	0	26 / 0
baishao	MOL000211	Cytosolic phospholipase A2	PLA2G4A	P47712	CHEMBL3816	Enzyme	0	23 / 0
baishao	MOL000211	Transient receptor potential cation channel subfamily M member 8	TRPM8	Q7Z2W7	CHEMBL1075319	Voltage-gated ion channel	0	21 / 0
baishao	MOL000211	Heat shock factor protein 1	HSF1	Q00613	CHEMBL5869	Other cytosolic protein	0	1 / 0
baishao	MOL000211	Integrin alpha-4/beta-1	ITGB1 ITGA4	P05556 P13612	CHEMBL1907599	Membrane receptor	0	35 / 0
baishao	MOL000211	Mu opioid receptor (by homology)	OPRM1	P35372	CHEMBL233	Family A G protein-coupled receptor	0	26 / 0
baishao	MOL000211	Delta opioid receptor (by homology)	OPRD1	P41143	CHEMBL236	Family A G protein-coupled receptor	0	25 / 0
baishao	MOL000211	G protein-coupled receptor 44	PTGDR2	Q9Y5Y4	CHEMBL5071	Family A G protein-coupled receptor	0	33 / 0
baishao	MOL000211	Integrin alpha-V/beta-3	ITGAV ITGB3	P06756 P05106	CHEMBL1907598	Membrane receptor	0	52 / 0
baishao	MOL000211	Bile acid transporter	SLC10A1	Q14973	CHEMBL5287	Electrochemical transporter	0	2 / 0
baishao	MOL000211	Phospholipase C-gamma-1	PLCG1	P19174	CHEMBL3964	Enzyme	0	1 / 0
baishao	MOL000211	CDC45-related protein	CDC45	O75419	CHEMBL3040	Other nuclear protein	0	0 / 1
baishao	MOL000211	Leukocyte common antigen	PTPRC	P08575	CHEMBL3243	Enzyme	0	0 / 1
baishao	MOL000211	Indoleamine 2,3-dioxygenase	IDO1	P14902	CHEMBL4685	Enzyme	0	0 / 1
baishao	MOL000211	Endothelin-converting enzyme 1	ECE1	P42892	CHEMBL4791	Protease	0	2 / 0
baishao	MOL000211	AMP deaminase 2	AMPD2	Q01433	CHEMBL2997	Enzyme	0	4 / 0
baishao	MOL000211	Kappa Opioid receptor	OPRK1	P41145	CHEMBL237	Family A G protein-coupled receptor	0	15 / 0
baishao	MOL000211	Ubiquitin-like domain-containing CTD phosphatase 1	UBLCP1	Q8WVY7	CHEMBL3317333	Enzyme	0	1 / 0
Baishao	MOL000358	HMG-CoA reductase	HMGCR	P04035	CHEMBL402	Oxidoreductase	0.680955	54 / 7
Baishao	MOL000358	Cytochrome P450 51 (by homology)	CYP51A1	Q16850	CHEMBL3849	Cytochrome P450	0.680955	3 / 2
Baishao	MOL000358	Androgen Receptor	AR	P10275	CHEMBL1871	Nuclear receptor	0.656004	26 / 102
Baishao	MOL000358	Niemann-Pick C1-like protein 1	NPC1L1	Q9UHC9	CHEMBL2027	Other membrane protein	0.647647	9 / 13
Baishao	MOL000358	LXR-alpha	NR1H3	Q13133	CHEMBL2808	Nuclear receptor	0.622656	19 / 20
Baishao	MOL000358	Cytochrome P450 17A1	CYP17A1	P05093	CHEMBL3522	Cytochrome P450	0.506041	48 / 50
Baishao	MOL000358	Nuclear receptor ROR-gamma	RORC	P51449	CHEMBL1741186	Nuclear receptor	0.431039	11 / 9
Baishao	MOL000358	Cytochrome P450 19A1	CYP19A1	P11511	CHEMBL1978	Cytochrome P450	0.314405	10 / 161
Baishao	MOL000358	Estrogen receptor beta	ESR2	Q92731	CHEMBL242	Nuclear receptor	0.306044	5 / 47
Baishao	MOL000358	Estrogen receptor alpha	ESR1	P03372	CHEMBL206	Nuclear receptor	0.222798	6 / 39
Baishao	MOL000358	Testis-specific androgen-binding protein	SHBG	P04278	CHEMBL3305	Secreted protein	0.189458	1 / 48
Baishao	MOL000358	Sterol regulatory element-binding protein 2	SREBF2	Q12772	CHEMBL1795166	Unclassified protein	0.17281	1 / 1
Baishao	MOL000358	Cytochrome P450 2C19	CYP2C19	P33261	CHEMBL3622	Cytochrome P450	0.131156	0 / 3
Baishao	MOL000358	Norepinephrine transporter	SLC6A2	P23975	CHEMBL222	Electrochemical transporter	0.122827	2 / 2
Baishao	MOL000358	Butyrylcholinesterase	BCHE	P06276	CHEMBL1914	Hydrolase	0.122827	3 / 2
Baishao	MOL000358	Nuclear receptor ROR-alpha	RORA	P35398	CHEMBL5868	Nuclear receptor	0.122827	3 / 3
Baishao	MOL000358	Protein-tyrosine phosphatase 1B	PTPN1	P18031	CHEMBL335	Phosphatase	0.122827	14 / 47
Baishao	MOL000358	Corticosteroid binding globulin	SERPINA6	P08185	CHEMBL2421	Secreted protein	0.114495	0 / 18
Baishao	MOL000358	Serotonin transporter	SLC6A4	P31645	CHEMBL228	Electrochemical transporter	0.106166	12 / 5
Baishao	MOL000358	Glucose-6-phosphate 1-dehydrogenase	G6PD	P11413	CHEMBL5347	Enzyme	0.106166	4 / 2
Baishao	MOL000358	Nuclear receptor subfamily 1 group I member 3 (by homology)	NR1I3	Q14994	CHEMBL5503	Nuclear receptor	0.106166	0 / 3
Baishao	MOL000358	Muscarinic acetylcholine receptor M2	CHRM2	P08172	CHEMBL211	Family A G protein-coupled receptor	0.106166	1 / 1
Baishao	MOL000358	Acetylcholinesterase	ACHE	P22303	CHEMBL220	Hydrolase	0.106166	3 / 1
Baishao	MOL000358	Vitamin D receptor	VDR	P11473	CHEMBL1977	Nuclear receptor	0.106166	17 / 49
Baishao	MOL000358	Carboxylesterase 2	CES2	O00748	CHEMBL3180	Enzyme	0.106166	6 / 10
Baishao	MOL000358	LXR-beta	NR1H2	P55055	CHEMBL4093	Nuclear receptor	0.106166	6 / 1
Baishao	MOL000358	Dual specificity phosphatase Cdc25A	CDC25A	P30304	CHEMBL3775	Phosphatase	0.106166	5 / 11
Baishao	MOL000358	Prostanoid EP1 receptor (by homology)	PTGER1	P34995	CHEMBL1811	Family A G protein-coupled receptor	0.106166	0 / 9
Baishao	MOL000358	Prostanoid EP2 receptor (by homology)	PTGER2	P43116	CHEMBL1881	Family A G protein-coupled receptor	0.106166	0 / 20
Baishao	MOL000358	11-beta-hydroxysteroid dehydrogenase 1	HSD11B1	P28845	CHEMBL4235	Enzyme	0.106166	61 / 23
Baishao	MOL000358	Anti-estrogen binding site (AEBS) (by homology)	DHCR7	Q9UBM7	CHEMBL2169735	Enzyme	0.106166	3 / 5
Baishao	MOL000358	Glycine receptor subunit alpha-1	GLRA1	P23415	CHEMBL5845	Ligand-gated ion channel	0.106166	1 / 1
Baishao	MOL000358	Peroxisome proliferator-activated receptor delta	PPARD	Q03181	CHEMBL3979	Nuclear receptor	0.106166	0 / 8
Baishao	MOL000358	Squalene monooxygenase	SQLE	Q14534	CHEMBL3592	Enzyme	0.106166	0 / 4
Baishao	MOL000358	Protein-tyrosine phosphatase 1C	PTPN6	P29350	CHEMBL3166	Phosphatase	0.106166	0 / 1
Baishao	MOL000358	Squalene synthetase (by homology)	FDFT1	P37268	CHEMBL3338	Enzyme	0.106166	0 / 1
Baishao	MOL000358	Nitric oxide synthase, inducible (by homology)	NOS2	P35228	CHEMBL4481	Enzyme	0.106166	2 / 16
Baishao	MOL000358	Glucocorticoid receptor	NR3C1	P04150	CHEMBL2034	Nuclear receptor	0.106166	15 / 25
Baishao	MOL000358	Dual specificity phosphatase Cdc25B	CDC25B	P30305	CHEMBL4804	Phosphatase	0.106166	5 / 7
Baishao	MOL000358	Sonic hedgehog protein (by homology)	SHH	Q15465	CHEMBL5602	Unclassified protein	0.106166	0 / 1
Baishao	MOL000358	UDP-glucuronosyltransferase 2B7	UGT2B7	P16662	CHEMBL4370	Enzyme	0.106166	0 / 8
Baishao	MOL000358	11-beta-hydroxysteroid dehydrogenase 2	HSD11B2	P80365	CHEMBL3746	Enzyme	0.106166	8 / 8
Baishao	MOL000358	Dopamine D2 receptor	DRD2	P14416	CHEMBL217	Family A G protein-coupled receptor	0.106166	16 / 0
Baishao	MOL000358	DNA polymerase beta (by homology)	POLB	P06746	CHEMBL2392	Enzyme	0.106166	0 / 6
baishao	MOL000358	Prolyl endopeptidase	PREP	P48147	CHEMBL3202	Protease	0	0 / 1
baishao	MOL000358	Thromboxane-A synthase	TBXAS1	P24557	CHEMBL1835	Cytochrome P450	0	3 / 1
baishao	MOL000358	Prostanoid EP4 receptor (by homology)	PTGER4	P35408	CHEMBL1836	Family A G protein-coupled receptor	0	0 / 6
baishao	MOL000358	Indoleamine 2,3-dioxygenase	IDO1	P14902	CHEMBL4685	Enzyme	0	0 / 1
baishao	MOL000358	Protein Mdm4	MDM4	O15151	CHEMBL1255126	Unclassified protein	0	4 / 0
baishao	MOL000358	C-C chemokine receptor type 1	CCR1	P32246	CHEMBL2413	Family A G protein-coupled receptor	0	48 / 0
baishao	MOL000358	p53-binding protein Mdm-2	MDM2	Q00987	CHEMBL5023	Other nuclear protein	0	36 / 0
baishao	MOL000358	Sigma opioid receptor	SIGMAR1	Q99720	CHEMBL287	Membrane receptor	0	9 / 5
baishao	MOL000358	Muscarinic acetylcholine receptor M4	CHRM4	P08173	CHEMBL1821	Family A G protein-coupled receptor	0	5 / 0
baishao	MOL000358	Potassium-transporting ATPase alpha chain 2	ATP12A	P54707	CHEMBL2933	Primary active transporter	0	0 / 2
baishao	MOL000358	Prostanoid IP receptor	PTGIR	P43119	CHEMBL1995	Family A G protein-coupled receptor	0	0 / 6
baishao	MOL000358	Protein kinase C gamma	PRKCG	P05129	CHEMBL2938	Kinase	0	6 / 0
baishao	MOL000358	Protein kinase C delta	PRKCD	Q05655	CHEMBL2996	Kinase	0	11 / 0
baishao	MOL000358	Protein kinase C beta	PRKCB	P05771	CHEMBL3045	Kinase	0	5 / 0
baishao	MOL000358	Protein kinase C epsilon	PRKCE	Q02156	CHEMBL3582	Kinase	0	6 / 0
baishao	MOL000358	Protein kinase C theta	PRKCQ	Q04759	CHEMBL3920	Kinase	0	5 / 0
baishao	MOL000358	Anti-estrogen binding site (AEBS)	DHCR7 EBP	Q9UBM7 Q15125	CHEMBL612409	Enzyme	0	0 / 1
baishao	MOL000358	Fatty acid binding protein adipocyte	FABP4	P15090	CHEMBL2083	Fatty acid binding protein family	0	0 / 3
baishao	MOL000358	Fatty acid binding protein muscle	FABP3	P05413	CHEMBL3344	Fatty acid binding protein family	0	0 / 4
baishao	MOL000358	Fatty acid binding protein epidermal	FABP5	Q01469	CHEMBL3674	Fatty acid binding protein family	0	0 / 1
baishao	MOL000358	Fatty acid-binding protein, liver	FABP1	P07148	CHEMBL5421	Fatty acid binding protein family	0	0 / 3
baishao	MOL000358	Prostaglandin E synthase	PTGES	O14684	CHEMBL5658	Enzyme	0	2 / 10
baishao	MOL000358	T-cell protein-tyrosine phosphatase	PTPN2	P17706	CHEMBL3807	Phosphatase	0	3 / 15
baishao	MOL000358	Adenosine A3 receptor	ADORA3	P0DMS8	CHEMBL256	Family A G protein-coupled receptor	0	0 / 1
baishao	MOL000358	MAP kinase ERK1	MAPK3	P27361	CHEMBL3385	Kinase	0	0 / 1
baishao	MOL000358	Protein-tyrosine phosphatase 2C	PTPN11	Q06124	CHEMBL3864	Phosphatase	0	0 / 1
baishao	MOL000358	Aldo-keto reductase family 1 member B10	AKR1B10	O60218	CHEMBL5983	Enzyme	0	0 / 6
baishao	MOL000358	Voltage-gated potassium channel subunit Kv1.5	KCNA5	P22460	CHEMBL4306	Voltage-gated ion channel	0	6 / 0
baishao	MOL000358	Acetyl-CoA carboxylase 2	ACACB	O00763	CHEMBL4829	Ligase	0	22 / 0
baishao	MOL000358	Receptor-type tyrosine-protein phosphatase F (LAR)	PTPRF	P10586	CHEMBL3521	Membrane receptor	0	0 / 1
baishao	MOL000358	Phospholipase A2 group 1B	PLA2G1B	P04054	CHEMBL4426	Enzyme	0	0 / 1
baishao	MOL000358	Low molecular weight phosphotyrosine protein phosphatase	ACP1	P24666	CHEMBL4903	Phosphatase	0	0 / 1
baishao	MOL000358	Beta-secretase 1	BACE1	P56817	CHEMBL4822	Protease	0	18 / 1
baishao	MOL000358	Serotonin 2b (5-HT2b) receptor	HTR2B	P41595	CHEMBL1833	Family A G protein-coupled receptor	0	2 / 0
baishao	MOL000358	Platelet activating factor receptor	PTAFR	P25105	CHEMBL250	Family A G protein-coupled receptor	0	2 / 0
baishao	MOL000358	Metabotropic glutamate receptor 2	GRM2	Q14416	CHEMBL5137	Family C G protein-coupled receptor	0	3 / 0
baishao	MOL000358	Acyl-CoA desaturase	SCD	O00767	CHEMBL5555	Enzyme	0	0 / 1
baishao	MOL000358	Beta secretase 2	BACE2	Q9Y5Z0	CHEMBL2525	Protease	0	1 / 0
baishao	MOL000358	Monoglyceride lipase	MGLL	Q99685	CHEMBL4191	Enzyme	0	5 / 0
baishao	MOL000358	Protein kinase C eta	PRKCH	P24723	CHEMBL3616	Kinase	0	5 / 1
baishao	MOL000358	Neurokinin 1 receptor (by homology)	TACR1	P25103	CHEMBL249	Family A G protein-coupled receptor	0	20 / 0
baishao	MOL000358	Peroxisome proliferator-activated receptor alpha	PPARA	Q07869	CHEMBL239	Nuclear receptor	0	1 / 11
baishao	MOL000358	Proteinase-activated receptor 1	F2R	P25116	CHEMBL3974	Family A G protein-coupled receptor	0	3 / 0
baishao	MOL000358	ALK tyrosine kinase receptor	ALK	Q9UM73	CHEMBL4247	Kinase	0	6 / 0
baishao	MOL000358	Insulin-like growth factor I receptor	IGF1R	P08069	CHEMBL1957	Kinase	0	7 / 0
baishao	MOL000358	Tyrosine-protein kinase SRC	SRC	P12931	CHEMBL267	Kinase	0	6 / 0
baishao	MOL000358	Vascular endothelial growth factor receptor 2	KDR	P35968	CHEMBL279	Kinase	0	11 / 0
baishao	MOL000358	Type-1 angiotensin II receptor (by homology)	AGTR1	P30556	CHEMBL227	Family A G protein-coupled receptor	0	4 / 0
baishao	MOL000358	DNA topoisomerase II alpha	TOP2A	P11388	CHEMBL1806	Isomerase	0	0 / 2
baishao	MOL000358	Vasopressin V2 receptor	AVPR2	P30518	CHEMBL1790	Family A G protein-coupled receptor	0	2 / 0
baishao	MOL000358	Vasopressin V1a receptor	AVPR1A	P37288	CHEMBL1889	Family A G protein-coupled receptor	0	5 / 0
baishao	MOL000358	Melatonin receptor 1A	MTNR1A	P48039	CHEMBL1945	Family A G protein-coupled receptor	0	4 / 0
baishao	MOL000358	Melatonin receptor 1B	MTNR1B	P49286	CHEMBL1946	Family A G protein-coupled receptor	0	4 / 0
baishao	MOL000358	Muscarinic acetylcholine receptor M5	CHRM5	P08912	CHEMBL2035	Family A G protein-coupled receptor	0	4 / 0
baishao	MOL000358	Interleukin-6 receptor subunit beta	IL6ST	P40189	CHEMBL3124734	Membrane receptor	0	1 / 0
baishao	MOL000358	MAP kinase p38 alpha	MAPK14	Q16539	CHEMBL260	Kinase	0	10 / 0
Baishao	MOL000359	HMG-CoA reductase	HMGCR	P04035	CHEMBL402	Oxidoreductase	0.680955	54 / 7
Baishao	MOL000359	Cytochrome P450 51 (by homology)	CYP51A1	Q16850	CHEMBL3849	Cytochrome P450	0.680955	3 / 2
Baishao	MOL000359	Androgen Receptor	AR	P10275	CHEMBL1871	Nuclear receptor	0.656004	26 / 102
Baishao	MOL000359	Niemann-Pick C1-like protein 1	NPC1L1	Q9UHC9	CHEMBL2027	Other membrane protein	0.647647	9 / 13
Baishao	MOL000359	LXR-alpha	NR1H3	Q13133	CHEMBL2808	Nuclear receptor	0.622656	19 / 20
Baishao	MOL000359	Cytochrome P450 17A1	CYP17A1	P05093	CHEMBL3522	Cytochrome P450	0.506041	48 / 50
Baishao	MOL000359	Nuclear receptor ROR-gamma	RORC	P51449	CHEMBL1741186	Nuclear receptor	0.431039	11 / 9
Baishao	MOL000359	Cytochrome P450 19A1	CYP19A1	P11511	CHEMBL1978	Cytochrome P450	0.314405	10 / 161
Baishao	MOL000359	Estrogen receptor beta	ESR2	Q92731	CHEMBL242	Nuclear receptor	0.306044	5 / 47
Baishao	MOL000359	Estrogen receptor alpha	ESR1	P03372	CHEMBL206	Nuclear receptor	0.222798	6 / 39
Baishao	MOL000359	Testis-specific androgen-binding protein	SHBG	P04278	CHEMBL3305	Secreted protein	0.189458	1 / 48
Baishao	MOL000359	Sterol regulatory element-binding protein 2	SREBF2	Q12772	CHEMBL1795166	Unclassified protein	0.17281	1 / 1
Baishao	MOL000359	Cytochrome P450 2C19	CYP2C19	P33261	CHEMBL3622	Cytochrome P450	0.131156	0 / 3
Baishao	MOL000359	Norepinephrine transporter	SLC6A2	P23975	CHEMBL222	Electrochemical transporter	0.122827	2 / 2
Baishao	MOL000359	Butyrylcholinesterase	BCHE	P06276	CHEMBL1914	Hydrolase	0.122827	3 / 2
Baishao	MOL000359	Nuclear receptor ROR-alpha	RORA	P35398	CHEMBL5868	Nuclear receptor	0.122827	3 / 3
Baishao	MOL000359	Protein-tyrosine phosphatase 1B	PTPN1	P18031	CHEMBL335	Phosphatase	0.122827	14 / 47
Baishao	MOL000359	Corticosteroid binding globulin	SERPINA6	P08185	CHEMBL2421	Secreted protein	0.114495	0 / 18
Baishao	MOL000359	Serotonin transporter	SLC6A4	P31645	CHEMBL228	Electrochemical transporter	0.106166	12 / 5
Baishao	MOL000359	Glucose-6-phosphate 1-dehydrogenase	G6PD	P11413	CHEMBL5347	Enzyme	0.106166	4 / 2
Baishao	MOL000359	Nuclear receptor subfamily 1 group I member 3 (by homology)	NR1I3	Q14994	CHEMBL5503	Nuclear receptor	0.106166	0 / 3
Baishao	MOL000359	Muscarinic acetylcholine receptor M2	CHRM2	P08172	CHEMBL211	Family A G protein-coupled receptor	0.106166	1 / 1
Baishao	MOL000359	Acetylcholinesterase	ACHE	P22303	CHEMBL220	Hydrolase	0.106166	3 / 1
Baishao	MOL000359	Vitamin D receptor	VDR	P11473	CHEMBL1977	Nuclear receptor	0.106166	17 / 49
Baishao	MOL000359	Carboxylesterase 2	CES2	O00748	CHEMBL3180	Enzyme	0.106166	6 / 10
Baishao	MOL000359	LXR-beta	NR1H2	P55055	CHEMBL4093	Nuclear receptor	0.106166	6 / 1
Baishao	MOL000359	Dual specificity phosphatase Cdc25A	CDC25A	P30304	CHEMBL3775	Phosphatase	0.106166	5 / 11
Baishao	MOL000359	Prostanoid EP1 receptor (by homology)	PTGER1	P34995	CHEMBL1811	Family A G protein-coupled receptor	0.106166	0 / 9
Baishao	MOL000359	Prostanoid EP2 receptor (by homology)	PTGER2	P43116	CHEMBL1881	Family A G protein-coupled receptor	0.106166	0 / 20
Baishao	MOL000359	11-beta-hydroxysteroid dehydrogenase 1	HSD11B1	P28845	CHEMBL4235	Enzyme	0.106166	61 / 23
Baishao	MOL000359	Anti-estrogen binding site (AEBS) (by homology)	DHCR7	Q9UBM7	CHEMBL2169735	Enzyme	0.106166	3 / 5
Baishao	MOL000359	Glycine receptor subunit alpha-1	GLRA1	P23415	CHEMBL5845	Ligand-gated ion channel	0.106166	1 / 1
Baishao	MOL000359	Peroxisome proliferator-activated receptor delta	PPARD	Q03181	CHEMBL3979	Nuclear receptor	0.106166	0 / 8
Baishao	MOL000359	Squalene monooxygenase	SQLE	Q14534	CHEMBL3592	Enzyme	0.106166	0 / 4
Baishao	MOL000359	Protein-tyrosine phosphatase 1C	PTPN6	P29350	CHEMBL3166	Phosphatase	0.106166	0 / 1
Baishao	MOL000359	Squalene synthetase (by homology)	FDFT1	P37268	CHEMBL3338	Enzyme	0.106166	0 / 1
Baishao	MOL000359	Nitric oxide synthase, inducible (by homology)	NOS2	P35228	CHEMBL4481	Enzyme	0.106166	2 / 16
Baishao	MOL000359	Glucocorticoid receptor	NR3C1	P04150	CHEMBL2034	Nuclear receptor	0.106166	15 / 25
Baishao	MOL000359	Dual specificity phosphatase Cdc25B	CDC25B	P30305	CHEMBL4804	Phosphatase	0.106166	5 / 7
Baishao	MOL000359	Sonic hedgehog protein (by homology)	SHH	Q15465	CHEMBL5602	Unclassified protein	0.106166	0 / 1
Baishao	MOL000359	UDP-glucuronosyltransferase 2B7	UGT2B7	P16662	CHEMBL4370	Enzyme	0.106166	0 / 8
Baishao	MOL000359	11-beta-hydroxysteroid dehydrogenase 2	HSD11B2	P80365	CHEMBL3746	Enzyme	0.106166	8 / 8
Baishao	MOL000359	Dopamine D2 receptor	DRD2	P14416	CHEMBL217	Family A G protein-coupled receptor	0.106166	16 / 0
Baishao	MOL000359	DNA polymerase beta (by homology)	POLB	P06746	CHEMBL2392	Enzyme	0.106166	0 / 6
baishao	MOL000359	Prolyl endopeptidase	PREP	P48147	CHEMBL3202	Protease	0	0 / 1
baishao	MOL000359	Thromboxane-A synthase	TBXAS1	P24557	CHEMBL1835	Cytochrome P450	0	3 / 1
baishao	MOL000359	Prostanoid EP4 receptor (by homology)	PTGER4	P35408	CHEMBL1836	Family A G protein-coupled receptor	0	0 / 6
baishao	MOL000359	Indoleamine 2,3-dioxygenase	IDO1	P14902	CHEMBL4685	Enzyme	0	0 / 1
baishao	MOL000359	Protein Mdm4	MDM4	O15151	CHEMBL1255126	Unclassified protein	0	4 / 0
baishao	MOL000359	C-C chemokine receptor type 1	CCR1	P32246	CHEMBL2413	Family A G protein-coupled receptor	0	48 / 0
baishao	MOL000359	p53-binding protein Mdm-2	MDM2	Q00987	CHEMBL5023	Other nuclear protein	0	36 / 0
baishao	MOL000359	Sigma opioid receptor	SIGMAR1	Q99720	CHEMBL287	Membrane receptor	0	9 / 5
baishao	MOL000359	Muscarinic acetylcholine receptor M4	CHRM4	P08173	CHEMBL1821	Family A G protein-coupled receptor	0	5 / 0
baishao	MOL000359	Potassium-transporting ATPase alpha chain 2	ATP12A	P54707	CHEMBL2933	Primary active transporter	0	0 / 2
baishao	MOL000359	Prostanoid IP receptor	PTGIR	P43119	CHEMBL1995	Family A G protein-coupled receptor	0	0 / 6
baishao	MOL000359	Protein kinase C gamma	PRKCG	P05129	CHEMBL2938	Kinase	0	6 / 0
baishao	MOL000359	Protein kinase C delta	PRKCD	Q05655	CHEMBL2996	Kinase	0	11 / 0
baishao	MOL000359	Protein kinase C beta	PRKCB	P05771	CHEMBL3045	Kinase	0	5 / 0
baishao	MOL000359	Protein kinase C epsilon	PRKCE	Q02156	CHEMBL3582	Kinase	0	6 / 0
baishao	MOL000359	Protein kinase C theta	PRKCQ	Q04759	CHEMBL3920	Kinase	0	5 / 0
baishao	MOL000359	Anti-estrogen binding site (AEBS)	DHCR7 EBP	Q9UBM7 Q15125	CHEMBL612409	Enzyme	0	0 / 1
baishao	MOL000359	Fatty acid binding protein adipocyte	FABP4	P15090	CHEMBL2083	Fatty acid binding protein family	0	0 / 3
baishao	MOL000359	Fatty acid binding protein muscle	FABP3	P05413	CHEMBL3344	Fatty acid binding protein family	0	0 / 4
baishao	MOL000359	Fatty acid binding protein epidermal	FABP5	Q01469	CHEMBL3674	Fatty acid binding protein family	0	0 / 1
baishao	MOL000359	Fatty acid-binding protein, liver	FABP1	P07148	CHEMBL5421	Fatty acid binding protein family	0	0 / 3
baishao	MOL000359	Prostaglandin E synthase	PTGES	O14684	CHEMBL5658	Enzyme	0	2 / 10
baishao	MOL000359	T-cell protein-tyrosine phosphatase	PTPN2	P17706	CHEMBL3807	Phosphatase	0	3 / 15
baishao	MOL000359	Adenosine A3 receptor	ADORA3	P0DMS8	CHEMBL256	Family A G protein-coupled receptor	0	0 / 1
baishao	MOL000359	MAP kinase ERK1	MAPK3	P27361	CHEMBL3385	Kinase	0	0 / 1
baishao	MOL000359	Protein-tyrosine phosphatase 2C	PTPN11	Q06124	CHEMBL3864	Phosphatase	0	0 / 1
baishao	MOL000359	Aldo-keto reductase family 1 member B10	AKR1B10	O60218	CHEMBL5983	Enzyme	0	0 / 6
baishao	MOL000359	Voltage-gated potassium channel subunit Kv1.5	KCNA5	P22460	CHEMBL4306	Voltage-gated ion channel	0	6 / 0
baishao	MOL000359	Acetyl-CoA carboxylase 2	ACACB	O00763	CHEMBL4829	Ligase	0	22 / 0
baishao	MOL000359	Receptor-type tyrosine-protein phosphatase F (LAR)	PTPRF	P10586	CHEMBL3521	Membrane receptor	0	0 / 1
baishao	MOL000359	Phospholipase A2 group 1B	PLA2G1B	P04054	CHEMBL4426	Enzyme	0	0 / 1
baishao	MOL000359	Low molecular weight phosphotyrosine protein phosphatase	ACP1	P24666	CHEMBL4903	Phosphatase	0	0 / 1
baishao	MOL000359	Beta-secretase 1	BACE1	P56817	CHEMBL4822	Protease	0	18 / 1
baishao	MOL000359	Serotonin 2b (5-HT2b) receptor	HTR2B	P41595	CHEMBL1833	Family A G protein-coupled receptor	0	2 / 0
baishao	MOL000359	Platelet activating factor receptor	PTAFR	P25105	CHEMBL250	Family A G protein-coupled receptor	0	2 / 0
baishao	MOL000359	Metabotropic glutamate receptor 2	GRM2	Q14416	CHEMBL5137	Family C G protein-coupled receptor	0	3 / 0
baishao	MOL000359	Acyl-CoA desaturase	SCD	O00767	CHEMBL5555	Enzyme	0	0 / 1
baishao	MOL000359	Beta secretase 2	BACE2	Q9Y5Z0	CHEMBL2525	Protease	0	1 / 0
baishao	MOL000359	Monoglyceride lipase	MGLL	Q99685	CHEMBL4191	Enzyme	0	5 / 0
baishao	MOL000359	Protein kinase C eta	PRKCH	P24723	CHEMBL3616	Kinase	0	5 / 1
baishao	MOL000359	Neurokinin 1 receptor (by homology)	TACR1	P25103	CHEMBL249	Family A G protein-coupled receptor	0	20 / 0
baishao	MOL000359	Peroxisome proliferator-activated receptor alpha	PPARA	Q07869	CHEMBL239	Nuclear receptor	0	1 / 11
baishao	MOL000359	Proteinase-activated receptor 1	F2R	P25116	CHEMBL3974	Family A G protein-coupled receptor	0	3 / 0
baishao	MOL000359	ALK tyrosine kinase receptor	ALK	Q9UM73	CHEMBL4247	Kinase	0	6 / 0
baishao	MOL000359	Insulin-like growth factor I receptor	IGF1R	P08069	CHEMBL1957	Kinase	0	7 / 0
baishao	MOL000359	Tyrosine-protein kinase SRC	SRC	P12931	CHEMBL267	Kinase	0	6 / 0
baishao	MOL000359	Vascular endothelial growth factor receptor 2	KDR	P35968	CHEMBL279	Kinase	0	11 / 0
baishao	MOL000359	Type-1 angiotensin II receptor (by homology)	AGTR1	P30556	CHEMBL227	Family A G protein-coupled receptor	0	4 / 0
baishao	MOL000359	DNA topoisomerase II alpha	TOP2A	P11388	CHEMBL1806	Isomerase	0	0 / 2
baishao	MOL000359	Vasopressin V2 receptor	AVPR2	P30518	CHEMBL1790	Family A G protein-coupled receptor	0	2 / 0
baishao	MOL000359	Vasopressin V1a receptor	AVPR1A	P37288	CHEMBL1889	Family A G protein-coupled receptor	0	5 / 0
baishao	MOL000359	Melatonin receptor 1A	MTNR1A	P48039	CHEMBL1945	Family A G protein-coupled receptor	0	4 / 0
baishao	MOL000359	Melatonin receptor 1B	MTNR1B	P49286	CHEMBL1946	Family A G protein-coupled receptor	0	4 / 0
baishao	MOL000359	Muscarinic acetylcholine receptor M5	CHRM5	P08912	CHEMBL2035	Family A G protein-coupled receptor	0	4 / 0
baishao	MOL000359	Interleukin-6 receptor subunit beta	IL6ST	P40189	CHEMBL3124734	Membrane receptor	0	1 / 0
baishao	MOL000359	MAP kinase p38 alpha	MAPK14	Q16539	CHEMBL260	Kinase	0	10 / 0
Baishao	MOL000422	NADPH oxidase 4	NOX4	Q9NPH5	CHEMBL1250375	Enzyme	1	7 / 8
Baishao	MOL000422	Aldose reductase (by homology)	AKR1B1	P15121	CHEMBL1900	Enzyme	1	18 / 71
Baishao	MOL000422	Xanthine dehydrogenase	XDH	P47989	CHEMBL1929	Oxidoreductase	1	12 / 20
Baishao	MOL000422	Tyrosinase	TYR	P14679	CHEMBL1973	Oxidoreductase	1	2 / 3
Baishao	MOL000422	Tyrosine-protein kinase receptor FLT3	FLT3	P36888	CHEMBL1974	Kinase	1	5 / 7
Baishao	MOL000422	Carbonic anhydrase II	CA2	P00918	CHEMBL205	Lyase	1	8 / 14
Baishao	MOL000422	Arachidonate 5-lipoxygenase	ALOX5	P09917	CHEMBL215	Oxidoreductase	1	5 / 47
Baishao	MOL000422	Carbonic anhydrase VII	CA7	P43166	CHEMBL2326	Lyase	1	8 / 13
Baishao	MOL000422	Estradiol 17-beta-dehydrogenase 2	HSD17B2	P37059	CHEMBL2789	Enzyme	1	9 / 3
Baishao	MOL000422	Multidrug resistance-associated protein 1	ABCC1	P33527	CHEMBL3004	Primary active transporter	1	7 / 11
Baishao	MOL000422	Estradiol 17-beta-dehydrogenase 1	HSD17B1	P14061	CHEMBL3181	Enzyme	1	9 / 4
Baishao	MOL000422	Aryl hydrocarbon receptor	AHR	P35869	CHEMBL3201	Transcription factor	1	1 / 1
Baishao	MOL000422	Carbonic anhydrase XII	CA12	O43570	CHEMBL3242	Lyase	1	10 / 17
Baishao	MOL000422	Estrogen-related receptor alpha	ESRRA	P11474	CHEMBL3429	Nuclear receptor	1	2 / 2
Baishao	MOL000422	P-glycoprotein 1	ABCB1	P08183	CHEMBL4302	Primary active transporter	1	12 / 48
Baishao	MOL000422	Cytochrome P450 1B1	CYP1B1	Q16678	CHEMBL4878	Cytochrome P450	1	12 / 46
Baishao	MOL000422	ATP-binding cassette sub-family G member 2	ABCG2	Q9UNQ0	CHEMBL5393	Primary active transporter	1	6 / 47
Baishao	MOL000422	Adenosine A1 receptor (by homology)	ADORA1	P30542	CHEMBL226	Family A G protein-coupled receptor	0.795047	6 / 23
Baishao	MOL000422	Carbonic anhydrase IV	CA4	P22748	CHEMBL3729	Lyase	0.795047	7 / 12
Baishao	MOL000422	Acetylcholinesterase	ACHE	P22303	CHEMBL220	Hydrolase	0.768469	4 / 26
Baishao	MOL000422	Monoamine oxidase A	MAOA	P21397	CHEMBL1951	Oxidoreductase	0.65802	5 / 18
Baishao	MOL000422	Glyoxalase I	GLO1	Q04760	CHEMBL2424	Enzyme	0.65802	3 / 4
Baishao	MOL000422	Tyrosine-protein kinase SYK	SYK	P43405	CHEMBL2599	Kinase	0.65802	3 / 3
Baishao	MOL000422	Glycogen synthase kinase-3 beta	GSK3B	P49841	CHEMBL262	Kinase	0.65802	3 / 6
Baishao	MOL000422	Matrix metalloproteinase 9	MMP9	P14780	CHEMBL321	Protease	0.65802	2 / 2
Baishao	MOL000422	Matrix metalloproteinase 2	MMP2	P08253	CHEMBL333	Protease	0.65802	2 / 2
Baishao	MOL000422	Arachidonate 15-lipoxygenase	ALOX15	P16050	CHEMBL2903	Enzyme	0.649781	6 / 8
Baishao	MOL000422	Arachidonate 12-lipoxygenase	ALOX12	P18054	CHEMBL3687	Enzyme	0.633326	9 / 10
Baishao	MOL000422	Receptor-type tyrosine-protein phosphatase S	PTPRS	Q13332	CHEMBL2396508	Phosphatase	0.608446	7 / 8
Baishao	MOL000422	Adenosine A2a receptor (by homology)	ADORA2A	P29274	CHEMBL251	Family A G protein-coupled receptor	0.567302	5 / 11
Baishao	MOL000422	Cyclin-dependent kinase 5/CDK5 activator 1	CDK5R1 CDK5	Q15078 Q00535	CHEMBL1907600	Kinase	0.517921	6 / 18
Baishao	MOL000422	Cyclin-dependent kinase 1/cyclin B	CCNB3 CDK1 CCNB1 CCNB2	Q8WWL7 P06493 P14635 O95067	CHEMBL2094127	Other cytosolic protein	0.517921	4 / 11
Baishao	MOL000422	Arginase-1 (by homology)	ARG1	P05089	CHEMBL1075097	Enzyme	0.517921	2 / 2
Baishao	MOL000422	G-protein coupled receptor 35	GPR35	Q9HC97	CHEMBL1293267	Family A G protein-coupled receptor	0.50153	2 / 4
Baishao	MOL000422	Estrogen receptor beta	ESR2	Q92731	CHEMBL242	Nuclear receptor	0.50153	93 / 38
Baishao	MOL000422	Death-associated protein kinase 1	DAPK1	P53355	CHEMBL2558	Kinase	0.50153	2 / 2
Baishao	MOL000422	DNA-3-methyladenine glycosylase	MPG	P29372	CHEMBL3396943	Enzyme	0.50153	1 / 1
Baishao	MOL000422	Solute carrier family 22 member 12	SLC22A12	Q96S37	CHEMBL6120	Electrochemical transporter	0.50153	6 / 1
Baishao	MOL000422	Transthyretin	TTR	P02766	CHEMBL3194	Secreted protein	0.484896	2 / 3
Baishao	MOL000422	Aldo-keto reductase family 1 member B10	AKR1B10	O60218	CHEMBL5983	Enzyme	0.484896	2 / 3
Baishao	MOL000422	Tankyrase-2	TNKS2	Q9H2K2	CHEMBL6154	Enzyme	0.484896	4 / 12
Baishao	MOL000422	Tankyrase-1	TNKS	O95271	CHEMBL6164	Enzyme	0.484896	4 / 28
Baishao	MOL000422	Cyclin-dependent kinase 6	CDK6	Q00534	CHEMBL2508	Kinase	0.476836	3 / 4
Baishao	MOL000422	Cyclin-dependent kinase 2	CDK2	P24941	CHEMBL301	Kinase	0.476836	1 / 17
Baishao	MOL000422	Cytochrome P450 19A1	CYP19A1	P11511	CHEMBL1978	Cytochrome P450	0.427205	6 / 18
Baishao	MOL000422	Casein kinase II alpha	CSNK2A1	P68400	CHEMBL3629	Kinase	0.427205	3 / 2
Baishao	MOL000422	Epidermal growth factor receptor erbB1	EGFR	P00533	CHEMBL203	Kinase	0.402643	7 / 29
Baishao	MOL000422	Vasopressin V2 receptor	AVPR2	P30518	CHEMBL1790	Family A G protein-coupled receptor	0.402643	1 / 1
Baishao	MOL000422	Insulin-like growth factor I receptor	IGF1R	P08069	CHEMBL1957	Kinase	0.402643	3 / 3
Baishao	MOL000422	Thrombin	F2	P00734	CHEMBL204	Protease	0.402643	11 / 3
Baishao	MOL000422	Serine/threonine-protein kinase PIM1	PIM1	P11309	CHEMBL2147	Kinase	0.402643	8 / 7
Baishao	MOL000422	Serine/threonine-protein kinase Aurora-B	AURKB	Q96GD4	CHEMBL2185	Kinase	0.402643	3 / 4
Baishao	MOL000422	Dopamine D4 receptor	DRD4	P21917	CHEMBL219	Family A G protein-coupled receptor	0.402643	1 / 1
Baishao	MOL000422	Myeloperoxidase	MPO	P05164	CHEMBL2439	Enzyme	0.402643	1 / 1
Baishao	MOL000422	PI3-kinase p85-alpha subunit	PIK3R1	P27986	CHEMBL2506	Enzyme	0.402643	1 / 1
Baishao	MOL000422	Liver glycogen phosphorylase	PYGL	P06737	CHEMBL2568	Enzyme	0.402643	1 / 1
Baishao	MOL000422	Carbonic anhydrase I	CA1	P00915	CHEMBL261	Lyase	0.402643	4 / 5
Baishao	MOL000422	Tyrosine-protein kinase SRC	SRC	P12931	CHEMBL267	Kinase	0.402643	3 / 10
Baishao	MOL000422	Focal adhesion kinase 1	PTK2	Q05397	CHEMBL2695	Kinase	0.402643	1 / 2
Baishao	MOL000422	Vascular endothelial growth factor receptor 2	KDR	P35968	CHEMBL279	Kinase	0.402643	2 / 3
Baishao	MOL000422	Matrix metalloproteinase 13	MMP13	P45452	CHEMBL280	Protease	0.402643	1 / 1
Baishao	MOL000422	Matrix metalloproteinase 3	MMP3	P08254	CHEMBL283	Protease	0.402643	1 / 1
Baishao	MOL000422	Carbonic anhydrase III	CA3	P07451	CHEMBL2885	Lyase	0.402643	1 / 1
Baishao	MOL000422	Serine/threonine-protein kinase PLK1	PLK1	P53350	CHEMBL3024	Kinase	0.402643	2 / 3
Baishao	MOL000422	Carbonic anhydrase VI	CA6	P23280	CHEMBL3025	Lyase	0.402643	1 / 1
Baishao	MOL000422	Cyclin-dependent kinase 1	CDK1	P06493	CHEMBL308	Kinase	0.402643	3 / 13
Baishao	MOL000422	Protein kinase N1	PKN1	Q16512	CHEMBL3384	Kinase	0.402643	1 / 3
Baishao	MOL000422	Carbonic anhydrase XIV	CA14	Q9ULX7	CHEMBL3510	Lyase	0.402643	1 / 1
Baishao	MOL000422	Carbonic anhydrase IX	CA9	Q16790	CHEMBL3594	Lyase	0.402643	3 / 6
Baishao	MOL000422	Hepatocyte growth factor receptor	MET	P08581	CHEMBL3717	Kinase	0.402643	4 / 4
Baishao	MOL000422	Serine/threonine-protein kinase NEK2	NEK2	P51955	CHEMBL3835	Kinase	0.402643	1 / 2
Baishao	MOL000422	Interleukin-8 receptor A	CXCR1	P25024	CHEMBL4029	Family A G protein-coupled receptor	0.402643	1 / 1
Baishao	MOL000422	CaM kinase II beta	CAMK2B	Q13554	CHEMBL4121	Kinase	0.402643	1 / 2
Baishao	MOL000422	ALK tyrosine kinase receptor	ALK	Q9UM73	CHEMBL4247	Kinase	0.402643	2 / 4
Baishao	MOL000422	Serine/threonine-protein kinase AKT	AKT1	P31749	CHEMBL4282	Kinase	0.402643	1 / 4
Baishao	MOL000422	Serine/threonine-protein kinase NEK6	NEK6	Q9HC98	CHEMBL4309	Kinase	0.402643	1 / 2
Baishao	MOL000422	Phospholipase A2 group 1B	PLA2G1B	P04054	CHEMBL4426	Enzyme	0.402643	1 / 1
Baishao	MOL000422	Carbonic anhydrase VA	CA5A	P35218	CHEMBL4789	Lyase	0.402643	1 / 1
Baishao	MOL000422	Beta-secretase 1	BACE1	P56817	CHEMBL4822	Protease	0.402643	6 / 17
Baishao	MOL000422	Tyrosine-protein kinase receptor UFO	AXL	P30530	CHEMBL4895	Kinase	0.402643	2 / 4
Baishao	MOL000422	NUAK family SNF1-like kinase 1	NUAK1	O60285	CHEMBL5784	Kinase	0.402643	1 / 2
Baishao	MOL000422	Aldo-keto reductase family 1 member C2 (by homology)	AKR1C2	P52895	CHEMBL5847	Enzyme	0.402643	1 / 1
Baishao	MOL000422	Aldo-keto reductase family 1 member C1 (by homology)	AKR1C1	Q04828	CHEMBL5905	Enzyme	0.402643	1 / 1
Baishao	MOL000422	Aldo-keto-reductase family 1 member C3 (by homology)	AKR1C3	P42330	CHEMBL4681	Enzyme	0.402643	1 / 1
Baishao	MOL000422	Aldo-keto reductase family 1 member C4 (by homology)	AKR1C4	P17516	CHEMBL4999	Enzyme	0.402643	1 / 1
Baishao	MOL000422	Carbonic anhydrase XIII (by homology)	CA13	Q8N1Q1	CHEMBL3912	Lyase	0.402643	1 / 1
Baishao	MOL000422	Aldehyde reductase (by homology)	AKR1A1	P14550	CHEMBL2246	Enzyme	0.402643	1 / 1
Baishao	MOL000422	Beta amyloid A4 protein	APP	P05067	CHEMBL2487	Membrane receptor	0.295453	2 / 12
Baishao	MOL000422	Poly [ADP-ribose] polymerase-1	PARP1	P09874	CHEMBL3105	Enzyme	0.295453	3 / 9
Baishao	MOL000422	Matrix metalloproteinase 12	MMP12	P39900	CHEMBL4393	Protease	0.295453	1 / 1
Baishao	MOL000422	Lymphocyte differentiation antigen CD38	CD38	P28907	CHEMBL4660	Enzyme	0.295453	2 / 2
Baishao	MOL000422	DNA topoisomerase I (by homology)	TOP1	P11387	CHEMBL1781	Isomerase	0.295453	1 / 1
Baishao	MOL000422	Estrogen receptor alpha	ESR1	P03372	CHEMBL206	Nuclear receptor	0.270837	73 / 38
Baishao	MOL000422	Cyclooxygenase-2	PTGS2	P35354	CHEMBL230	Oxidoreductase	0.270837	1 / 25
Baishao	MOL000422	Cystic fibrosis transmembrane conductance regulator	CFTR	P13569	CHEMBL4051	Other ion channel	0.270837	1 / 1
Baishao	MOL000422	6-phosphofructo-2-kinase/fructose-2,6-bisphosphatase 3	PFKFB3	Q16875	CHEMBL2331053	Enzyme	0.262582	2 / 2
Baishao	MOL000422	AMY1C	AMY1A	P04745	CHEMBL2478	Enzyme	0.237885	1 / 1
Baishao	MOL000422	G protein-coupled receptor kinase 6	GRK6	P43250	CHEMBL6144	Kinase	0.237885	2 / 4
Baishao	MOL000422	Telomerase reverse transcriptase	TERT	O14746	CHEMBL2916	Enzyme	0.229686	9 / 22
Baishao	MOL000422	Microtubule-associated protein tau	MAPT	P10636	CHEMBL1293224	Unclassified protein	0.171979	1 / 1
Baishao	MOL001924	Galectin-3	LGALS3	P17931	CHEMBL4531	Other cytosolic protein	0.219976	10 / 7
Baishao	MOL001924	Galectin-9	LGALS9	O00182	CHEMBL5474	Other cytosolic protein	0.219976	4 / 1
Baishao	MOL001924	Heat shock protein HSP 90-alpha	HSP90AA1	P07900	CHEMBL3880	Other cytosolic protein	0.14515	7 / 6
Baishao	MOL001924	Somatostatin receptor 2	SSTR2	P30874	CHEMBL1804	Family A G protein-coupled receptor	0.120226	0 / 13
Baishao	MOL001924	Somatostatin receptor 4	SSTR4	P31391	CHEMBL1853	Family A G protein-coupled receptor	0.120226	0 / 20
Baishao	MOL001924	Somatostatin receptor 1	SSTR1	P30872	CHEMBL1917	Family A G protein-coupled receptor	0.120226	0 / 9
Baishao	MOL001924	Somatostatin receptor 3	SSTR3	P32745	CHEMBL2028	Family A G protein-coupled receptor	0.120226	0 / 13
Baishao	MOL001924	P-glycoprotein 1	ABCB1	P08183	CHEMBL4302	Primary active transporter	0.120226	0 / 104
Baishao	MOL001924	Vascular endothelial growth factor A	VEGFA	P15692	CHEMBL1783	Secreted protein	0.120226	0 / 2
Baishao	MOL001924	Acidic fibroblast growth factor	FGF1	P05230	CHEMBL2120	Secreted protein	0.120226	0 / 3
Baishao	MOL001924	Basic fibroblast growth factor	FGF2	P09038	CHEMBL3107	Secreted protein	0.120226	0 / 2
Baishao	MOL001924	Heparanase	HPSE	Q9Y251	CHEMBL3921	Enzyme	0.120226	0 / 2
Baishao	MOL001924	Norepinephrine transporter	SLC6A2	P23975	CHEMBL222	Electrochemical transporter	0.120226	1 / 3
Baishao	MOL001924	Carbonic anhydrase XIV	CA14	Q9ULX7	CHEMBL3510	Lyase	0.120226	30 / 0
Baishao	MOL001924	Adenosine A2a receptor	ADORA2A	P29274	CHEMBL251	Family A G protein-coupled receptor	0.120226	433 / 0
Baishao	MOL001924	Adenosine A2b receptor	ADORA2B	P29275	CHEMBL255	Family A G protein-coupled receptor	0.120226	32 / 0
Baishao	MOL001924	Adenosine A3 receptor	ADORA3	P0DMS8	CHEMBL256	Family A G protein-coupled receptor	0.120226	367 / 0
Baishao	MOL001924	Protein-tyrosine phosphatase 1B	PTPN1	P18031	CHEMBL335	Phosphatase	0.120226	15 / 7
Baishao	MOL001924	Thrombin and coagulation factor X	F10	P00742	CHEMBL244	Protease	0.120226	0 / 3
Baishao	MOL001924	AMY1C	AMY1A	P04745	CHEMBL2478	Enzyme	0.120226	0 / 1
Baishao	MOL001924	Plasminogen activator inhibitor-1	SERPINE1	P05121	CHEMBL3475	Secreted protein	0.120226	0 / 10
Baishao	MOL001924	Squalene monooxygenase (by homology)	SQLE	Q14534	CHEMBL3592	Enzyme	0.120226	0 / 15
Baishao	MOL001924	Eukaryotic translation initiation factor 4H	EIF4H	Q15056	CHEMBL1293274	Other nuclear protein	0.120226	1 / 0
Baishao	MOL001924	Polyadenylate-binding protein 1	PABPC1	P11940	CHEMBL1293286	Unclassified protein	0.120226	1 / 0
Baishao	MOL001924	Transforming protein p21/H-Ras-1	HRAS	P01112	CHEMBL2167	Other cytosolic protein	0.120226	2 / 0
Baishao	MOL001924	Matrix metalloproteinase 13	MMP13	P45452	CHEMBL280	Protease	0.120226	7 / 0
Baishao	MOL001924	Matrix metalloproteinase 1	MMP1	P03956	CHEMBL332	Protease	0.120226	21 / 0
Baishao	MOL001924	Matrix metalloproteinase 7	MMP7	P09237	CHEMBL4073	Protease	0.120226	5 / 0
Baishao	MOL001924	Matrix metalloproteinase 8	MMP8	P22894	CHEMBL4588	Protease	0.120226	21 / 0
Baishao	MOL001924	Solute carrier family 28 member 3	SLC28A3	Q9HAS3	CHEMBL5707	Electrochemical transporter	0.120226	1 / 0
Baishao	MOL001924	Equilibrative nucleoside transporter 1	SLC29A1	Q99808	CHEMBL1997	Electrochemical transporter	0.120226	83 / 0
Baishao	MOL001924	Alpha-L-fucosidase I	FUCA1	P04066	CHEMBL4176	Enzyme	0.120226	35 / 0
Baishao	MOL001924	Beta-glucocerebrosidase	GBA	P04062	CHEMBL2179	Enzyme	0.120226	24 / 0
Baishao	MOL001924	Hexokinase type II	HK2	P52789	CHEMBL2640	Enzyme	0.120226	8 / 0
Baishao	MOL001924	Hexokinase type I	HK1	P19367	CHEMBL2688	Enzyme	0.120226	7 / 0
Baishao	MOL001924	Histone deacetylase 1	HDAC1	Q13547	CHEMBL325	Eraser	0.120226	9 / 0
Baishao	MOL001924	Matrix metalloproteinase 3	MMP3	P08254	CHEMBL283	Protease	0.120226	18 / 0
Baishao	MOL001924	Matrix metalloproteinase 9	MMP9	P14780	CHEMBL321	Protease	0.120226	22 / 0
Baishao	MOL001924	ADAM17	ADAM17	P78536	CHEMBL3706	Protease	0.120226	14 / 0
Baishao	MOL001924	Somatostatin receptor 5	SSTR5	P35346	CHEMBL1792	Family A G protein-coupled receptor	0.120226	1 / 17
Baishao	MOL001924	Adenosine kinase	ADK	P55263	CHEMBL3589	Enzyme	0.120226	99 / 0
Baishao	MOL001924	Aldose reductase	AKR1B1	P15121	CHEMBL1900	Enzyme	0.120226	34 / 1
Baishao	MOL001924	Carbonic anhydrase VII	CA7	P43166	CHEMBL2326	Lyase	0.120226	11 / 0
Baishao	MOL001924	Carbonic anhydrase IV	CA4	P22748	CHEMBL3729	Lyase	0.120226	9 / 0
Baishao	MOL001924	Carbonic anhydrase XIII	CA13	Q8N1Q1	CHEMBL3912	Lyase	0.120226	7 / 0
Baishao	MOL001924	Carbonic anhydrase VA	CA5A	P35218	CHEMBL4789	Lyase	0.120226	6 / 0
Baishao	MOL001924	DNA topoisomerase I	TOP1	P11387	CHEMBL1781	Isomerase	0.120226	21 / 0
Baishao	MOL001924	Methionine aminopeptidase 2	METAP2	P50579	CHEMBL3922	Protease	0.120226	13 / 0
Baishao	MOL001924	Purine nucleoside phosphorylase	PNP	P00491	CHEMBL4338	Enzyme	0.120226	79 / 0
Baishao	MOL001924	Bifunctional protein NCOAT	OGA	O60502	CHEMBL5921	Enzyme	0.120226	43 / 0
Baishao	MOL001924	Serine/threonine-protein kinase Chk1	CHEK1	O14757	CHEMBL4630	Kinase	0.120226	7 / 0
Baishao	MOL001924	Tyrosine-protein kinase ABL	ABL1	P00519	CHEMBL1862	Kinase	0.120226	3 / 0
Baishao	MOL001924	Ephrin type-A receptor 2	EPHA2	P29317	CHEMBL2068	Kinase	0.120226	1 / 0
Baishao	MOL001924	Tyrosine-protein kinase LCK	LCK	P06239	CHEMBL258	Kinase	0.120226	3 / 0
Baishao	MOL001924	Tyrosine-protein kinase SRC	SRC	P12931	CHEMBL267	Kinase	0.120226	2 / 0
Baishao	MOL001924	Vascular endothelial growth factor receptor 2	KDR	P35968	CHEMBL279	Kinase	0.120226	4 / 0
Baishao	MOL001924	Mitogen-activated protein kinase kinase kinase 9	MAP3K9	P80192	CHEMBL2872	Kinase	0.120226	1 / 0
Baishao	MOL001924	Fibroblast growth factor receptor 1	FGFR1	P11362	CHEMBL3650	Kinase	0.120226	1 / 0
Baishao	MOL001924	Serine/threonine-protein kinase Aurora-A	AURKA	O14965	CHEMBL4722	Kinase	0.120226	4 / 0
Baishao	MOL001924	Tyrosine-protein kinase BTK	BTK	Q06187	CHEMBL5251	Kinase	0.120226	1 / 0
Baishao	MOL001924	Epidermal growth factor receptor erbB1	EGFR	P00533	CHEMBL203	Kinase	0.120226	7 / 0
Baishao	MOL001924	Neprilysin	MME	P08473	CHEMBL1944	Protease	0.120226	66 / 0
Baishao	MOL001924	Dual specificity phosphatase Cdc25B	CDC25B	P30305	CHEMBL4804	Phosphatase	0.120226	5 / 0
baishao	MOL001924	Glyceraldehyde-3-phosphate dehydrogenase liver	GAPDH	P04406	CHEMBL2284	Oxidoreductase	0	6 / 0
baishao	MOL001924	Lysosomal alpha-glucosidase	GAA	P10253	CHEMBL2608	Hydrolase	0	5 / 0
baishao	MOL001924	Heat shock cognate 71 kDa protein	HSPA8	P11142	CHEMBL1275223	Other cytosolic protein	0	10 / 0
baishao	MOL001924	Carbonic anhydrase III	CA3	P07451	CHEMBL2885	Lyase	0	1 / 0
baishao	MOL001924	Carbonic anhydrase VI	CA6	P23280	CHEMBL3025	Lyase	0	2 / 0
baishao	MOL001924	c-Jun N-terminal kinase 3	MAPK10	P53779	CHEMBL2637	Kinase	0	1 / 0
baishao	MOL001924	DNA (cytosine-5)-methyltransferase 1	DNMT1	P26358	CHEMBL1993	Writer	0	3 / 0
baishao	MOL001924	Adenosine deaminase	ADA	P00813	CHEMBL1910	Hydrolase	0	10 / 0
baishao	MOL001924	Sodium/glucose cotransporter 2	SLC5A2	P31639	CHEMBL3884	Electrochemical transporter	0	652 / 52
baishao	MOL001924	Phosphodiesterase 4D	PDE4D	Q08499	CHEMBL288	Phosphodiesterase	0	0 / 1
baishao	MOL001924	Cyclin-dependent kinase 2/cyclin A	CDK2 CCNA1 CCNA2	P24941 P78396 P20248	CHEMBL2094128	Other cytosolic protein	0	9 / 0
baishao	MOL001924	Induced myeloid leukemia cell differentiation protein Mcl-1	MCL1	Q07820	CHEMBL4361	Other cytosolic protein	0	12 / 0
baishao	MOL001924	Mitogen-activated protein kinase kinase kinase 7	MAP3K7	O43318	CHEMBL5776	Kinase	0	9 / 0
baishao	MOL001924	Gamma-secretase	PSEN2 PSENEN NCSTN APH1A PSEN1 APH1B	P49810 Q9NZ42 Q92542 Q96BI3 P49768 Q8WW43	CHEMBL2094135	Protease	0	0 / 11
baishao	MOL001924	Endothelin-converting enzyme 1	ECE1	P42892	CHEMBL4791	Protease	0	26 / 0
baishao	MOL001924	6-O-methylguanine-DNA methyltransferase	MGMT	P16455	CHEMBL2864	Enzyme	0	2 / 0
baishao	MOL001924	Methionyl-tRNA synthetase	MARS	P56192	CHEMBL2870	Enzyme	0	7 / 0
baishao	MOL001924	Inosine-5'-monophosphate dehydrogenase 1	IMPDH1	P20839	CHEMBL1822	Oxidoreductase	0	37 / 0
baishao	MOL001924	Inosine-5'-monophosphate dehydrogenase 2	IMPDH2	P12268	CHEMBL2002	Oxidoreductase	0	42 / 0
baishao	MOL001924	Type-1 angiotensin II receptor	AGTR1	P30556	CHEMBL227	Family A G protein-coupled receptor	0	5 / 0
baishao	MOL001924	Thymidine kinase, cytosolic	TK1	P04183	CHEMBL2883	Transferase	0	8 / 0
baishao	MOL001924	S-adenosylmethionine decarboxylase 1	AMD1	P17707	CHEMBL4181	Enzyme	0	15 / 0
baishao	MOL001924	Cytidine deaminase	CDA	P32320	CHEMBL4502	Enzyme	0	25 / 0
baishao	MOL001924	Aldo-keto-reductase family 1 member C3	AKR1C3	P42330	CHEMBL4681	Enzyme	0	19 / 0
baishao	MOL001924	S-methyl-5-thioadenosine phosphorylase	MTAP	Q13126	CHEMBL4941	Enzyme	0	26 / 0
baishao	MOL001924	NAALADase II	NAALAD2	Q9Y3Q0	CHEMBL2609	Protease	0	4 / 0
baishao	MOL001924	Thymidine phosphorylase	TYMP	P19971	CHEMBL3106	Enzyme	0	9 / 0
baishao	MOL001924	Adenosylhomocysteinase	AHCY	P23526	CHEMBL2664	Enzyme	0	39 / 0
baishao	MOL001924	Platelet activating factor receptor (by homology)	PTAFR	P25105	CHEMBL250	Family A G protein-coupled receptor	0	5 / 15
baishao	MOL001924	Endothelin receptor ET-A	EDNRA	P25101	CHEMBL252	Family A G protein-coupled receptor	0	32 / 0
baishao	MOL001924	AMP deaminase 3	AMPD3	Q01432	CHEMBL2912	Enzyme	0	9 / 0
baishao	MOL001924	AICAR transformylase	ATIC	P31939	CHEMBL2518	Enzyme	0	1 / 0
baishao	MOL001924	Arachidonate 12-lipoxygenase	ALOX12	P18054	CHEMBL3687	Enzyme	0	1 / 0
baishao	MOL001924	GAR transformylase (by homology)	GART	P22102	CHEMBL3972	Ligase	0	1 / 0
baishao	MOL001924	Beta-secretase 1	BACE1	P56817	CHEMBL4822	Protease	0	4 / 4
baishao	MOL001924	Sodium/nucleoside cotransporter 2	SLC28A2	O43868	CHEMBL5780	Electrochemical transporter	0	16 / 0
baishao	MOL001924	Hydroxycarboxylic acid receptor 2	HCAR2	Q8TDS4	CHEMBL3785	Family A G protein-coupled receptor	0	41 / 0
Dangshen	MOL000006	NADPH oxidase 4	NOX4	Q9NPH5	CHEMBL1250375	Enzyme	1	6 / 8
Dangshen	MOL000006	Aldose reductase	AKR1B1	P15121	CHEMBL1900	Enzyme	1	17 / 71
Dangshen	MOL000006	Cyclin-dependent kinase 5/CDK5 activator 1	CDK5R1 CDK5	Q15078 Q00535	CHEMBL1907600	Kinase	1	6 / 18
Dangshen	MOL000006	Xanthine dehydrogenase	XDH	P47989	CHEMBL1929	Oxidoreductase	1	12 / 20
Dangshen	MOL000006	Monoamine oxidase A	MAOA	P21397	CHEMBL1951	Oxidoreductase	1	5 / 18
Dangshen	MOL000006	Tyrosine-protein kinase receptor FLT3	FLT3	P36888	CHEMBL1974	Kinase	1	5 / 7
Dangshen	MOL000006	Carbonic anhydrase II	CA2	P00918	CHEMBL205	Lyase	1	8 / 14
Dangshen	MOL000006	Cyclin-dependent kinase 1/cyclin B	CCNB3 CDK1 CCNB1 CCNB2	Q8WWL7 P06493 P14635 O95067	CHEMBL2094127	Other cytosolic protein	1	4 / 11
Dangshen	MOL000006	Arachidonate 5-lipoxygenase	ALOX5	P09917	CHEMBL215	Oxidoreductase	1	5 / 47
Dangshen	MOL000006	Adenosine A1 receptor (by homology)	ADORA1	P30542	CHEMBL226	Family A G protein-coupled receptor	1	6 / 23
Dangshen	MOL000006	Carbonic anhydrase VII	CA7	P43166	CHEMBL2326	Lyase	1	8 / 11
Dangshen	MOL000006	Glyoxalase I	GLO1	Q04760	CHEMBL2424	Enzyme	1	3 / 4
Dangshen	MOL000006	Beta amyloid A4 protein	APP	P05067	CHEMBL2487	Membrane receptor	1	2 / 12
Dangshen	MOL000006	Tyrosine-protein kinase SYK	SYK	P43405	CHEMBL2599	Kinase	1	3 / 3
Dangshen	MOL000006	Glycogen synthase kinase-3 beta	GSK3B	P49841	CHEMBL262	Kinase	1	3 / 7
Dangshen	MOL000006	Poly [ADP-ribose] polymerase-1	PARP1	P09874	CHEMBL3105	Enzyme	1	3 / 9
Dangshen	MOL000006	Transthyretin	TTR	P02766	CHEMBL3194	Secreted protein	1	2 / 2
Dangshen	MOL000006	Matrix metalloproteinase 9	MMP9	P14780	CHEMBL321	Protease	1	2 / 2
Dangshen	MOL000006	Carbonic anhydrase XII	CA12	O43570	CHEMBL3242	Lyase	1	10 / 15
Dangshen	MOL000006	Matrix metalloproteinase 2	MMP2	P08253	CHEMBL333	Protease	1	2 / 2
Dangshen	MOL000006	Carbonic anhydrase IV	CA4	P22748	CHEMBL3729	Lyase	1	7 / 10
Dangshen	MOL000006	Matrix metalloproteinase 12	MMP12	P39900	CHEMBL4393	Protease	1	1 / 1
Dangshen	MOL000006	Lymphocyte differentiation antigen CD38	CD38	P28907	CHEMBL4660	Enzyme	1	2 / 2
Dangshen	MOL000006	Cytochrome P450 1B1	CYP1B1	Q16678	CHEMBL4878	Cytochrome P450	1	12 / 46
Dangshen	MOL000006	ATP-binding cassette sub-family G member 2	ABCG2	Q9UNQ0	CHEMBL5393	Primary active transporter	1	6 / 49
Dangshen	MOL000006	Aldo-keto reductase family 1 member B10	AKR1B10	O60218	CHEMBL5983	Enzyme	1	2 / 3
Dangshen	MOL000006	Tankyrase-2	TNKS2	Q9H2K2	CHEMBL6154	Enzyme	1	4 / 12
Dangshen	MOL000006	Tankyrase-1	TNKS	O95271	CHEMBL6164	Enzyme	1	4 / 28
Dangshen	MOL000006	DNA topoisomerase I (by homology)	TOP1	P11387	CHEMBL1781	Isomerase	1	1 / 1
Dangshen	MOL000006	Arginase-1 (by homology)	ARG1	P05089	CHEMBL1075097	Enzyme	1	2 / 2
Dangshen	MOL000006	Receptor-type tyrosine-protein phosphatase S	PTPRS	Q13332	CHEMBL2396508	Phosphatase	0.857023	7 / 8
Dangshen	MOL000006	Multidrug resistance-associated protein 1	ABCC1	P33527	CHEMBL3004	Primary active transporter	0.65802	7 / 11
Dangshen	MOL000006	Estradiol 17-beta-dehydrogenase 1	HSD17B1	P14061	CHEMBL3181	Enzyme	0.65802	10 / 4
Dangshen	MOL000006	Acetylcholinesterase	ACHE	P22303	CHEMBL220	Hydrolase	0.600412	4 / 27
Dangshen	MOL000006	Cyclin-dependent kinase 6	CDK6	Q00534	CHEMBL2508	Kinase	0.600412	3 / 4
Dangshen	MOL000006	P-glycoprotein 1	ABCB1	P08183	CHEMBL4302	Primary active transporter	0.534505	12 / 48
Dangshen	MOL000006	Estradiol 17-beta-dehydrogenase 2	HSD17B2	P37059	CHEMBL2789	Enzyme	0.468553	10 / 3
Dangshen	MOL000006	Cytochrome P450 19A1	CYP19A1	P11511	CHEMBL1978	Cytochrome P450	0.460289	6 / 19
Dangshen	MOL000006	Estrogen receptor beta	ESR2	Q92731	CHEMBL242	Nuclear receptor	0.460289	84 / 36
Dangshen	MOL000006	Adenosine A2a receptor (by homology)	ADORA2A	P29274	CHEMBL251	Family A G protein-coupled receptor	0.460289	5 / 11
Dangshen	MOL000006	Casein kinase II alpha	CSNK2A1	P68400	CHEMBL3629	Kinase	0.460289	3 / 2
Dangshen	MOL000006	Arachidonate 15-lipoxygenase	ALOX15	P16050	CHEMBL2903	Enzyme	0.43552	6 / 8
Dangshen	MOL000006	Arachidonate 12-lipoxygenase	ALOX12	P18054	CHEMBL3687	Enzyme	0.43552	9 / 11
Dangshen	MOL000006	Estrogen receptor alpha	ESR1	P03372	CHEMBL206	Nuclear receptor	0.386212	66 / 37
Dangshen	MOL000006	Cyclooxygenase-2	PTGS2	P35354	CHEMBL230	Oxidoreductase	0.386212	1 / 12
Dangshen	MOL000006	Cystic fibrosis transmembrane conductance regulator	CFTR	P13569	CHEMBL4051	Other ion channel	0.386212	1 / 1
Dangshen	MOL000006	AMY1C	AMY1A	P04745	CHEMBL2478	Enzyme	0.361228	1 / 1
Dangshen	MOL000006	G protein-coupled receptor kinase 6	GRK6	P43250	CHEMBL6144	Kinase	0.361228	2 / 4
Dangshen	MOL000006	Carbonic anhydrase I	CA1	P00915	CHEMBL261	Lyase	0.33674	4 / 6
Dangshen	MOL000006	Carbonic anhydrase IX	CA9	Q16790	CHEMBL3594	Lyase	0.33674	3 / 6
Dangshen	MOL000006	Cyclin-dependent kinase 2	CDK2	P24941	CHEMBL301	Kinase	0.328396	1 / 14
Dangshen	MOL000006	Telomerase reverse transcriptase	TERT	O14746	CHEMBL2916	Enzyme	0.320219	9 / 22
Dangshen	MOL000006	Cyclin-dependent kinase 1	CDK1	P06493	CHEMBL308	Kinase	0.303816	3 / 10
Dangshen	MOL000006	Tyrosinase	TYR	P14679	CHEMBL1973	Oxidoreductase	0.287307	2 / 2
Dangshen	MOL000006	Aryl hydrocarbon receptor	AHR	P35869	CHEMBL3201	Transcription factor	0.287307	1 / 1
Dangshen	MOL000006	Estrogen-related receptor alpha	ESRRA	P11474	CHEMBL3429	Nuclear receptor	0.287307	2 / 2
Dangshen	MOL000006	G-protein coupled receptor 35	GPR35	Q9HC97	CHEMBL1293267	Family A G protein-coupled receptor	0.279037	2 / 4
Dangshen	MOL000006	Vasopressin V2 receptor	AVPR2	P30518	CHEMBL1790	Family A G protein-coupled receptor	0.279037	1 / 1
Dangshen	MOL000006	Insulin-like growth factor I receptor	IGF1R	P08069	CHEMBL1957	Kinase	0.279037	3 / 3
Dangshen	MOL000006	Epidermal growth factor receptor erbB1	EGFR	P00533	CHEMBL203	Kinase	0.279037	6 / 30
Dangshen	MOL000006	Thrombin	F2	P00734	CHEMBL204	Protease	0.279037	11 / 3
Dangshen	MOL000006	Serine/threonine-protein kinase PIM1	PIM1	P11309	CHEMBL2147	Kinase	0.279037	8 / 7
Dangshen	MOL000006	Serine/threonine-protein kinase Aurora-B	AURKB	Q96GD4	CHEMBL2185	Kinase	0.279037	3 / 4
Dangshen	MOL000006	Dopamine D4 receptor	DRD4	P21917	CHEMBL219	Family A G protein-coupled receptor	0.279037	1 / 1
Dangshen	MOL000006	Myeloperoxidase	MPO	P05164	CHEMBL2439	Enzyme	0.279037	1 / 1
Dangshen	MOL000006	PI3-kinase p85-alpha subunit	PIK3R1	P27986	CHEMBL2506	Enzyme	0.279037	1 / 1
Dangshen	MOL000006	Death-associated protein kinase 1	DAPK1	P53355	CHEMBL2558	Kinase	0.279037	2 / 2
Dangshen	MOL000006	Liver glycogen phosphorylase	PYGL	P06737	CHEMBL2568	Enzyme	0.279037	1 / 1
Dangshen	MOL000006	Tyrosine-protein kinase SRC	SRC	P12931	CHEMBL267	Kinase	0.279037	3 / 10
Dangshen	MOL000006	Focal adhesion kinase 1	PTK2	Q05397	CHEMBL2695	Kinase	0.279037	1 / 2
Dangshen	MOL000006	Vascular endothelial growth factor receptor 2	KDR	P35968	CHEMBL279	Kinase	0.279037	2 / 3
Dangshen	MOL000006	Matrix metalloproteinase 13	MMP13	P45452	CHEMBL280	Protease	0.279037	1 / 1
Dangshen	MOL000006	Matrix metalloproteinase 3	MMP3	P08254	CHEMBL283	Protease	0.279037	1 / 1
Dangshen	MOL000006	Carbonic anhydrase III	CA3	P07451	CHEMBL2885	Lyase	0.279037	1 / 1
Dangshen	MOL000006	Serine/threonine-protein kinase PLK1	PLK1	P53350	CHEMBL3024	Kinase	0.279037	2 / 3
Dangshen	MOL000006	Carbonic anhydrase VI	CA6	P23280	CHEMBL3025	Lyase	0.279037	1 / 1
Dangshen	MOL000006	Protein kinase N1	PKN1	Q16512	CHEMBL3384	Kinase	0.279037	1 / 3
Dangshen	MOL000006	Carbonic anhydrase XIV	CA14	Q9ULX7	CHEMBL3510	Lyase	0.279037	1 / 1
Dangshen	MOL000006	Hepatocyte growth factor receptor	MET	P08581	CHEMBL3717	Kinase	0.279037	3 / 4
Dangshen	MOL000006	Serine/threonine-protein kinase NEK2	NEK2	P51955	CHEMBL3835	Kinase	0.279037	1 / 2
Dangshen	MOL000006	Interleukin-8 receptor A	CXCR1	P25024	CHEMBL4029	Family A G protein-coupled receptor	0.279037	1 / 1
Dangshen	MOL000006	CaM kinase II beta	CAMK2B	Q13554	CHEMBL4121	Kinase	0.279037	1 / 2
Dangshen	MOL000006	ALK tyrosine kinase receptor	ALK	Q9UM73	CHEMBL4247	Kinase	0.279037	2 / 4
Dangshen	MOL000006	Serine/threonine-protein kinase AKT	AKT1	P31749	CHEMBL4282	Kinase	0.279037	1 / 4
Dangshen	MOL000006	Serine/threonine-protein kinase NEK6	NEK6	Q9HC98	CHEMBL4309	Kinase	0.279037	1 / 2
Dangshen	MOL000006	Phospholipase A2 group 1B	PLA2G1B	P04054	CHEMBL4426	Enzyme	0.279037	1 / 1
Dangshen	MOL000006	Carbonic anhydrase VA	CA5A	P35218	CHEMBL4789	Lyase	0.279037	1 / 1
Dangshen	MOL000006	Beta-secretase 1	BACE1	P56817	CHEMBL4822	Protease	0.279037	5 / 14
Dangshen	MOL000006	Tyrosine-protein kinase receptor UFO	AXL	P30530	CHEMBL4895	Kinase	0.279037	2 / 4
Dangshen	MOL000006	NUAK family SNF1-like kinase 1	NUAK1	O60285	CHEMBL5784	Kinase	0.279037	1 / 2
Dangshen	MOL000006	Aldo-keto reductase family 1 member C2 (by homology)	AKR1C2	P52895	CHEMBL5847	Enzyme	0.279037	1 / 1
Dangshen	MOL000006	Aldo-keto reductase family 1 member C1 (by homology)	AKR1C1	Q04828	CHEMBL5905	Enzyme	0.279037	1 / 1
Dangshen	MOL000006	Aldo-keto-reductase family 1 member C3 (by homology)	AKR1C3	P42330	CHEMBL4681	Enzyme	0.279037	1 / 1
Dangshen	MOL000006	Aldo-keto reductase family 1 member C4 (by homology)	AKR1C4	P17516	CHEMBL4999	Enzyme	0.279037	1 / 1
Dangshen	MOL000006	Carbonic anhydrase XIII (by homology)	CA13	Q8N1Q1	CHEMBL3912	Lyase	0.279037	1 / 1
Dangshen	MOL000006	Aldehyde reductase (by homology)	AKR1A1	P14550	CHEMBL2246	Enzyme	0.279037	1 / 1
Dangshen	MOL000006	6-phosphofructo-2-kinase/fructose-2,6-bisphosphatase 3	PFKFB3	Q16875	CHEMBL2331053	Enzyme	0.147257	2 / 2
Dangshen	MOL000006	Plasminogen	PLG	P00747	CHEMBL1801	Protease	0.147257	6 / 3
Dangshen	MOL000006	Lysine-specific demethylase 4D-like	KDM4E	B2RXH2	CHEMBL1293226	Eraser	0.147257	2 / 2
Dangshen	MOL000006	Androgen Receptor	AR	P10275	CHEMBL1871	Nuclear receptor	0.139062	0 / 16
Dangshen	MOL000449	Cytochrome P450 51 (by homology)	CYP51A1	Q16850	CHEMBL3849	Cytochrome P450	0.664324	6 / 2
Dangshen	MOL000449	HMG-CoA reductase	HMGCR	P04035	CHEMBL402	Oxidoreductase	0.664324	79 / 7
Dangshen	MOL000449	LXR-alpha	NR1H3	Q13133	CHEMBL2808	Nuclear receptor	0.630968	18 / 20
Dangshen	MOL000449	Niemann-Pick C1-like protein 1	NPC1L1	Q9UHC9	CHEMBL2027	Other membrane protein	0.589276	8 / 13
Dangshen	MOL000449	Cytochrome P450 17A1	CYP17A1	P05093	CHEMBL3522	Cytochrome P450	0.506041	53 / 50
Dangshen	MOL000449	Androgen Receptor	AR	P10275	CHEMBL1871	Nuclear receptor	0.497677	40 / 102
Dangshen	MOL000449	Sterol regulatory element-binding protein 2	SREBF2	Q12772	CHEMBL1795166	Unclassified protein	0.456018	0 / 1
Dangshen	MOL000449	Cytochrome P450 19A1	CYP19A1	P11511	CHEMBL1978	Cytochrome P450	0.431039	19 / 161
Dangshen	MOL000449	Nuclear receptor ROR-gamma	RORC	P51449	CHEMBL1741186	Nuclear receptor	0.356071	10 / 9
Dangshen	MOL000449	Estrogen receptor alpha	ESR1	P03372	CHEMBL206	Nuclear receptor	0.314405	10 / 39
Dangshen	MOL000449	Estrogen receptor beta	ESR2	Q92731	CHEMBL242	Nuclear receptor	0.314405	8 / 47
Dangshen	MOL000449	Testis-specific androgen-binding protein	SHBG	P04278	CHEMBL3305	Secreted protein	0.239432	1 / 48
Dangshen	MOL000449	Norepinephrine transporter	SLC6A2	P23975	CHEMBL222	Electrochemical transporter	0.131156	6 / 2
Dangshen	MOL000449	Corticosteroid binding globulin	SERPINA6	P08185	CHEMBL2421	Secreted protein	0.114495	0 / 18
Dangshen	MOL000449	Protein-tyrosine phosphatase 1B	PTPN1	P18031	CHEMBL335	Phosphatase	0.114495	17 / 47
Dangshen	MOL000449	Muscarinic acetylcholine receptor M2	CHRM2	P08172	CHEMBL211	Family A G protein-coupled receptor	0.114495	12 / 1
Dangshen	MOL000449	Nuclear receptor ROR-alpha	RORA	P35398	CHEMBL5868	Nuclear receptor	0.114495	3 / 3
Dangshen	MOL000449	Butyrylcholinesterase	BCHE	P06276	CHEMBL1914	Hydrolase	0.114495	5 / 2
Dangshen	MOL000449	Serotonin transporter	SLC6A4	P31645	CHEMBL228	Electrochemical transporter	0.106166	22 / 5
Dangshen	MOL000449	Acetylcholinesterase	ACHE	P22303	CHEMBL220	Hydrolase	0.106166	4 / 1
Dangshen	MOL000449	Cytochrome P450 2C19	CYP2C19	P33261	CHEMBL3622	Cytochrome P450	0.106166	2 / 3
Dangshen	MOL000449	Glucose-6-phosphate 1-dehydrogenase	G6PD	P11413	CHEMBL5347	Enzyme	0.106166	4 / 2
Dangshen	MOL000449	Dual specificity phosphatase Cdc25A	CDC25A	P30304	CHEMBL3775	Phosphatase	0.106166	9 / 11
Dangshen	MOL000449	Carboxylesterase 2	CES2	O00748	CHEMBL3180	Enzyme	0.106166	5 / 10
Dangshen	MOL000449	LXR-beta	NR1H2	P55055	CHEMBL4093	Nuclear receptor	0.106166	4 / 1
Dangshen	MOL000449	Vitamin D receptor	VDR	P11473	CHEMBL1977	Nuclear receptor	0.106166	12 / 49
Dangshen	MOL000449	Prostanoid EP1 receptor (by homology)	PTGER1	P34995	CHEMBL1811	Family A G protein-coupled receptor	0.106166	0 / 9
Dangshen	MOL000449	Prostanoid EP2 receptor (by homology)	PTGER2	P43116	CHEMBL1881	Family A G protein-coupled receptor	0.106166	0 / 20
Dangshen	MOL000449	11-beta-hydroxysteroid dehydrogenase 1	HSD11B1	P28845	CHEMBL4235	Enzyme	0.106166	129 / 23
Dangshen	MOL000449	Peroxisome proliferator-activated receptor delta	PPARD	Q03181	CHEMBL3979	Nuclear receptor	0.106166	0 / 8
Dangshen	MOL000449	Glycine receptor subunit alpha-1	GLRA1	P23415	CHEMBL5845	Ligand-gated ion channel	0.106166	1 / 1
Dangshen	MOL000449	Squalene monooxygenase	SQLE	Q14534	CHEMBL3592	Enzyme	0.106166	0 / 4
Dangshen	MOL000449	Nuclear receptor subfamily 1 group I member 3 (by homology)	NR1I3	Q14994	CHEMBL5503	Nuclear receptor	0.106166	2 / 3
Dangshen	MOL000449	Anti-estrogen binding site (AEBS) (by homology)	DHCR7	Q9UBM7	CHEMBL2169735	Enzyme	0.106166	3 / 5
Dangshen	MOL000449	Protein-tyrosine phosphatase 1C	PTPN6	P29350	CHEMBL3166	Phosphatase	0.106166	0 / 1
Dangshen	MOL000449	Glucocorticoid receptor	NR3C1	P04150	CHEMBL2034	Nuclear receptor	0.106166	78 / 25
Dangshen	MOL000449	Thromboxane-A synthase	TBXAS1	P24557	CHEMBL1835	Cytochrome P450	0.106166	3 / 1
Dangshen	MOL000449	Glucagon receptor	GCGR	P47871	CHEMBL1985	Family B G protein-coupled receptor	0.106166	22 / 0
Dangshen	MOL000449	Nitric oxide synthase, inducible (by homology)	NOS2	P35228	CHEMBL4481	Enzyme	0.106166	2 / 16
Dangshen	MOL000449	11-beta-hydroxysteroid dehydrogenase 2	HSD11B2	P80365	CHEMBL3746	Enzyme	0.106166	9 / 8
Dangshen	MOL000449	DNA polymerase beta (by homology)	POLB	P06746	CHEMBL2392	Enzyme	0.106166	0 / 6
dangshen	MOL000449	Prolyl endopeptidase	PREP	P48147	CHEMBL3202	Protease	0	0 / 1
dangshen	MOL000449	Protein Mdm4	MDM4	O15151	CHEMBL1255126	Unclassified protein	0	5 / 0
dangshen	MOL000449	p53-binding protein Mdm-2	MDM2	Q00987	CHEMBL5023	Other nuclear protein	0	40 / 0
dangshen	MOL000449	Dopamine D2 receptor	DRD2	P14416	CHEMBL217	Family A G protein-coupled receptor	0	17 / 0
dangshen	MOL000449	T-cell protein-tyrosine phosphatase	PTPN2	P17706	CHEMBL3807	Phosphatase	0	1 / 15
dangshen	MOL000449	Prostanoid EP4 receptor (by homology)	PTGER4	P35408	CHEMBL1836	Family A G protein-coupled receptor	0	0 / 6
dangshen	MOL000449	Indoleamine 2,3-dioxygenase	IDO1	P14902	CHEMBL4685	Enzyme	0	0 / 1
dangshen	MOL000449	Potassium-transporting ATPase alpha chain 2	ATP12A	P54707	CHEMBL2933	Primary active transporter	0	0 / 2
dangshen	MOL000449	C-C chemokine receptor type 1	CCR1	P32246	CHEMBL2413	Family A G protein-coupled receptor	0	68 / 0
dangshen	MOL000449	Sigma opioid receptor	SIGMAR1	Q99720	CHEMBL287	Membrane receptor	0	11 / 5
dangshen	MOL000449	Prostaglandin E synthase	PTGES	O14684	CHEMBL5658	Enzyme	0	2 / 10
dangshen	MOL000449	Prostanoid IP receptor	PTGIR	P43119	CHEMBL1995	Family A G protein-coupled receptor	0	0 / 6
dangshen	MOL000449	Vasopressin V1a receptor	AVPR1A	P37288	CHEMBL1889	Family A G protein-coupled receptor	0	10 / 0
dangshen	MOL000449	Protein kinase C delta	PRKCD	Q05655	CHEMBL2996	Kinase	0	17 / 0
dangshen	MOL000449	Anti-estrogen binding site (AEBS)	DHCR7 EBP	Q9UBM7 Q15125	CHEMBL612409	Enzyme	0	0 / 1
dangshen	MOL000449	Fatty acid binding protein adipocyte	FABP4	P15090	CHEMBL2083	Fatty acid binding protein family	0	0 / 3
dangshen	MOL000449	Fatty acid binding protein muscle	FABP3	P05413	CHEMBL3344	Fatty acid binding protein family	0	0 / 4
dangshen	MOL000449	Fatty acid binding protein epidermal	FABP5	Q01469	CHEMBL3674	Fatty acid binding protein family	0	0 / 1
dangshen	MOL000449	Fatty acid-binding protein, liver	FABP1	P07148	CHEMBL5421	Fatty acid binding protein family	0	0 / 3
dangshen	MOL000449	Monoglyceride lipase	MGLL	Q99685	CHEMBL4191	Enzyme	0	4 / 0
dangshen	MOL000449	Dual specificity phosphatase Cdc25B	CDC25B	P30305	CHEMBL4804	Phosphatase	0	8 / 7
dangshen	MOL000449	MAP kinase ERK1	MAPK3	P27361	CHEMBL3385	Kinase	0	0 / 1
dangshen	MOL000449	Protein-tyrosine phosphatase 2C	PTPN11	Q06124	CHEMBL3864	Phosphatase	0	0 / 1
dangshen	MOL000449	Aldo-keto reductase family 1 member B10	AKR1B10	O60218	CHEMBL5983	Enzyme	0	0 / 6
dangshen	MOL000449	Muscarinic acetylcholine receptor M4	CHRM4	P08173	CHEMBL1821	Family A G protein-coupled receptor	0	8 / 0
dangshen	MOL000449	Cannabinoid receptor 1 (by homology)	CNR1	P21554	CHEMBL218	Family A G protein-coupled receptor	0	153 / 16
dangshen	MOL000449	Neurokinin 1 receptor	TACR1	P25103	CHEMBL249	Family A G protein-coupled receptor	0	23 / 0
dangshen	MOL000449	Cytochrome P450 11B1	CYP11B1	P15538	CHEMBL1908	Cytochrome P450	0	2 / 0
dangshen	MOL000449	Cytochrome P450 11B2	CYP11B2	P19099	CHEMBL2722	Cytochrome P450	0	3 / 0
dangshen	MOL000449	Cytochrome P450 3A4	CYP3A4	P08684	CHEMBL340	Cytochrome P450	0	4 / 0
dangshen	MOL000449	Receptor-type tyrosine-protein phosphatase F (LAR)	PTPRF	P10586	CHEMBL3521	Membrane receptor	0	0 / 1
dangshen	MOL000449	Phospholipase A2 group 1B	PLA2G1B	P04054	CHEMBL4426	Enzyme	0	0 / 1
dangshen	MOL000449	Low molecular weight phosphotyrosine protein phosphatase	ACP1	P24666	CHEMBL4903	Phosphatase	0	0 / 1
dangshen	MOL000449	Beta secretase 2	BACE2	Q9Y5Z0	CHEMBL2525	Protease	0	1 / 0
dangshen	MOL000449	MAP kinase p38 alpha	MAPK14	Q16539	CHEMBL260	Kinase	0	15 / 0
dangshen	MOL000449	Beta amyloid A4 protein	APP	P05067	CHEMBL2487	Membrane receptor	0	10 / 0
dangshen	MOL000449	Interleukin-6 receptor subunit beta	IL6ST	P40189	CHEMBL3124734	Membrane receptor	0	1 / 0
dangshen	MOL000449	Acyl-CoA desaturase	SCD	O00767	CHEMBL5555	Enzyme	0	0 / 1
dangshen	MOL000449	Acetyl-CoA carboxylase 2	ACACB	O00763	CHEMBL4829	Ligase	0	18 / 0
dangshen	MOL000449	Muscarinic acetylcholine receptor M1	CHRM1	P11229	CHEMBL216	Family A G protein-coupled receptor	0	14 / 0
dangshen	MOL000449	C5a anaphylatoxin chemotactic receptor	C5AR1	P21730	CHEMBL2373	Family A G protein-coupled receptor	0	7 / 0
dangshen	MOL000449	Muscarinic acetylcholine receptor M3	CHRM3	P20309	CHEMBL245	Family A G protein-coupled receptor	0	13 / 0
dangshen	MOL000449	Nociceptin receptor	OPRL1	P41146	CHEMBL2014	Family A G protein-coupled receptor	0	8 / 0
dangshen	MOL000449	Mu opioid receptor	OPRM1	P35372	CHEMBL233	Family A G protein-coupled receptor	0	15 / 0
dangshen	MOL000449	Protein kinase C gamma	PRKCG	P05129	CHEMBL2938	Kinase	0	7 / 0
dangshen	MOL000449	Protein kinase C epsilon	PRKCE	Q02156	CHEMBL3582	Kinase	0	8 / 0
dangshen	MOL000449	Protein kinase C theta	PRKCQ	Q04759	CHEMBL3920	Kinase	0	6 / 0
dangshen	MOL000449	GABA-B receptor (by homology)	GABBR1	Q9UBS5	CHEMBL2064	Family C G protein-coupled receptor	0	2 / 0
dangshen	MOL000449	Oxytocin receptor (by homology)	OXTR	P30559	CHEMBL2049	Family A G protein-coupled receptor	0	27 / 0
dangshen	MOL000449	Serotonin 2b (5-HT2b) receptor	HTR2B	P41595	CHEMBL1833	Family A G protein-coupled receptor	0	2 / 0
dangshen	MOL000449	Platelet activating factor receptor	PTAFR	P25105	CHEMBL250	Family A G protein-coupled receptor	0	4 / 0
dangshen	MOL000449	Metabotropic glutamate receptor 2	GRM2	Q14416	CHEMBL5137	Family C G protein-coupled receptor	0	4 / 0
dangshen	MOL000449	Insulin-like growth factor I receptor	IGF1R	P08069	CHEMBL1957	Kinase	0	6 / 0
dangshen	MOL000449	Tyrosine-protein kinase SRC	SRC	P12931	CHEMBL267	Kinase	0	6 / 0
dangshen	MOL000449	Vascular endothelial growth factor receptor 2	KDR	P35968	CHEMBL279	Kinase	0	13 / 0
dangshen	MOL000449	Coagulation factor XI	F11	P03951	CHEMBL2820	Protease	0	8 / 0
dangshen	MOL000449	Neuropeptide Y receptor type 2	NPY2R	P49146	CHEMBL4018	Family A G protein-coupled receptor	0	4 / 0
dangshen	MOL000449	ALK tyrosine kinase receptor	ALK	Q9UM73	CHEMBL4247	Kinase	0	6 / 0
dangshen	MOL000449	DNA topoisomerase II alpha	TOP2A	P11388	CHEMBL1806	Isomerase	0	0 / 2
Dangshen	MOL001006	Androgen Receptor	AR	P10275	CHEMBL1871	Nuclear receptor	0.680955	19 / 106
Dangshen	MOL001006	Norepinephrine transporter	SLC6A2	P23975	CHEMBL222	Electrochemical transporter	0.322747	3 / 2
Dangshen	MOL001006	Acetylcholinesterase	ACHE	P22303	CHEMBL220	Hydrolase	0.306044	0 / 1
Dangshen	MOL001006	Cytochrome P450 2C19	CYP2C19	P33261	CHEMBL3622	Cytochrome P450	0.306044	0 / 3
Dangshen	MOL001006	Niemann-Pick C1-like protein 1	NPC1L1	Q9UHC9	CHEMBL2027	Other membrane protein	0.247762	7 / 13
Dangshen	MOL001006	LXR-alpha	NR1H3	Q13133	CHEMBL2808	Nuclear receptor	0.247762	13 / 20
Dangshen	MOL001006	HMG-CoA reductase	HMGCR	P04035	CHEMBL402	Oxidoreductase	0.239432	36 / 22
Dangshen	MOL001006	Cytochrome P450 51 (by homology)	CYP51A1	Q16850	CHEMBL3849	Cytochrome P450	0.239432	3 / 2
Dangshen	MOL001006	Butyrylcholinesterase	BCHE	P06276	CHEMBL1914	Hydrolase	0.23112	2 / 2
Dangshen	MOL001006	Cytochrome P450 19A1	CYP19A1	P11511	CHEMBL1978	Cytochrome P450	0.197793	5 / 190
Dangshen	MOL001006	Protein-tyrosine phosphatase 1B	PTPN1	P18031	CHEMBL335	Phosphatase	0.197793	10 / 52
Dangshen	MOL001006	Muscarinic acetylcholine receptor M2	CHRM2	P08172	CHEMBL211	Family A G protein-coupled receptor	0.189458	2 / 2
Dangshen	MOL001006	Nuclear receptor ROR-gamma	RORC	P51449	CHEMBL1741186	Nuclear receptor	0.189458	7 / 9
Dangshen	MOL001006	Cytochrome P450 17A1	CYP17A1	P05093	CHEMBL3522	Cytochrome P450	0.18109	39 / 51
Dangshen	MOL001006	Estrogen receptor alpha	ESR1	P03372	CHEMBL206	Nuclear receptor	0.156149	1 / 40
Dangshen	MOL001006	Serotonin transporter	SLC6A4	P31645	CHEMBL228	Electrochemical transporter	0.156149	6 / 5
Dangshen	MOL001006	Estrogen receptor beta	ESR2	Q92731	CHEMBL242	Nuclear receptor	0.131156	1 / 48
Dangshen	MOL001006	Nuclear receptor subfamily 1 group I member 3 (by homology)	NR1I3	Q14994	CHEMBL5503	Nuclear receptor	0.122827	0 / 3
Dangshen	MOL001006	Testis-specific androgen-binding protein	SHBG	P04278	CHEMBL3305	Secreted protein	0.114495	1 / 48
Dangshen	MOL001006	Sterol regulatory element-binding protein 2	SREBF2	Q12772	CHEMBL1795166	Unclassified protein	0.106166	1 / 1
Dangshen	MOL001006	Prostaglandin E synthase	PTGES	O14684	CHEMBL5658	Enzyme	0.106166	0 / 11
Dangshen	MOL001006	Carboxylesterase 2	CES2	O00748	CHEMBL3180	Enzyme	0.106166	4 / 11
Dangshen	MOL001006	Anti-estrogen binding site (AEBS) (by homology)	DHCR7	Q9UBM7	CHEMBL2169735	Enzyme	0.106166	2 / 6
Dangshen	MOL001006	Squalene monooxygenase	SQLE	Q14534	CHEMBL3592	Enzyme	0.106166	0 / 4
Dangshen	MOL001006	Corticosteroid binding globulin	SERPINA6	P08185	CHEMBL2421	Secreted protein	0.106166	0 / 19
Dangshen	MOL001006	Nuclear receptor ROR-alpha	RORA	P35398	CHEMBL5868	Nuclear receptor	0.106166	3 / 3
Dangshen	MOL001006	Protein-tyrosine phosphatase 1C	PTPN6	P29350	CHEMBL3166	Phosphatase	0.106166	0 / 1
Dangshen	MOL001006	T-cell protein-tyrosine phosphatase	PTPN2	P17706	CHEMBL3807	Phosphatase	0.106166	0 / 17
Dangshen	MOL001006	11-beta-hydroxysteroid dehydrogenase 1	HSD11B1	P28845	CHEMBL4235	Enzyme	0.106166	39 / 31
Dangshen	MOL001006	11-beta-hydroxysteroid dehydrogenase 2	HSD11B2	P80365	CHEMBL3746	Enzyme	0.106166	6 / 13
Dangshen	MOL001006	Dual specificity phosphatase Cdc25A	CDC25A	P30304	CHEMBL3775	Phosphatase	0.106166	5 / 11
Dangshen	MOL001006	Vitamin D receptor	VDR	P11473	CHEMBL1977	Nuclear receptor	0.106166	8 / 45
Dangshen	MOL001006	Glycine receptor subunit alpha-1	GLRA1	P23415	CHEMBL5845	Ligand-gated ion channel	0.106166	1 / 1
Dangshen	MOL001006	Nitric oxide synthase, inducible (by homology)	NOS2	P35228	CHEMBL4481	Enzyme	0.106166	1 / 18
Dangshen	MOL001006	Prolyl endopeptidase	PREP	P48147	CHEMBL3202	Protease	0.106166	0 / 1
Dangshen	MOL001006	DNA polymerase beta (by homology)	POLB	P06746	CHEMBL2392	Enzyme	0.106166	0 / 6
Dangshen	MOL001006	Glucose-6-phosphate 1-dehydrogenase	G6PD	P11413	CHEMBL5347	Enzyme	0.106166	1 / 2
Dangshen	MOL001006	Potassium-transporting ATPase alpha chain 2	ATP12A	P54707	CHEMBL2933	Primary active transporter	0.106166	0 / 2
Dangshen	MOL001006	Dual specificity phosphatase Cdc25B	CDC25B	P30305	CHEMBL4804	Phosphatase	0.106166	5 / 7
Dangshen	MOL001006	LXR-beta	NR1H2	P55055	CHEMBL4093	Nuclear receptor	0.106166	3 / 1
Dangshen	MOL001006	Fatty acid binding protein adipocyte	FABP4	P15090	CHEMBL2083	Fatty acid binding protein family	0.106166	0 / 3
Dangshen	MOL001006	Fatty acid binding protein muscle	FABP3	P05413	CHEMBL3344	Fatty acid binding protein family	0.106166	0 / 4
Dangshen	MOL001006	Fatty acid binding protein epidermal	FABP5	Q01469	CHEMBL3674	Fatty acid binding protein family	0.106166	0 / 1
Dangshen	MOL001006	Peroxisome proliferator-activated receptor delta	PPARD	Q03181	CHEMBL3979	Nuclear receptor	0.106166	0 / 8
Dangshen	MOL001006	Fatty acid-binding protein, liver	FABP1	P07148	CHEMBL5421	Fatty acid binding protein family	0.106166	0 / 3
Dangshen	MOL001006	Adenosine A3 receptor	ADORA3	P0DMS8	CHEMBL256	Family A G protein-coupled receptor	0.106166	0 / 1
Dangshen	MOL001006	MAP kinase ERK1	MAPK3	P27361	CHEMBL3385	Kinase	0.106166	0 / 1
Dangshen	MOL001006	Protein-tyrosine phosphatase 2C	PTPN11	Q06124	CHEMBL3864	Phosphatase	0.106166	0 / 1
Dangshen	MOL001006	Aldo-keto reductase family 1 member B10	AKR1B10	O60218	CHEMBL5983	Enzyme	0.106166	0 / 6
Dangshen	MOL001006	Cannabinoid receptor 1 (by homology)	CNR1	P21554	CHEMBL218	Family A G protein-coupled receptor	0.106166	70 / 16
Dangshen	MOL001006	Beta-secretase 1	BACE1	P56817	CHEMBL4822	Protease	0.106166	10 / 2
Dangshen	MOL001006	Phosphodiesterase 4D	PDE4D	Q08499	CHEMBL288	Phosphodiesterase	0.106166	0 / 1
Dangshen	MOL001006	Receptor-type tyrosine-protein phosphatase F (LAR)	PTPRF	P10586	CHEMBL3521	Membrane receptor	0.106166	0 / 1
Dangshen	MOL001006	UDP-glucuronosyltransferase 2B7	UGT2B7	P16662	CHEMBL4370	Enzyme	0.106166	0 / 22
Dangshen	MOL001006	Phospholipase A2 group 1B	PLA2G1B	P04054	CHEMBL4426	Enzyme	0.106166	0 / 1
Dangshen	MOL001006	Low molecular weight phosphotyrosine protein phosphatase	ACP1	P24666	CHEMBL4903	Phosphatase	0.106166	0 / 1
Dangshen	MOL001006	Acyl-CoA desaturase	SCD	O00767	CHEMBL5555	Enzyme	0.106166	0 / 1
Dangshen	MOL001006	DNA topoisomerase II alpha	TOP2A	P11388	CHEMBL1806	Isomerase	0.106166	0 / 2
dangshen	MOL001006	Prostanoid EP1 receptor (by homology)	PTGER1	P34995	CHEMBL1811	Family A G protein-coupled receptor	0	0 / 9
dangshen	MOL001006	Prostanoid EP2 receptor (by homology)	PTGER2	P43116	CHEMBL1881	Family A G protein-coupled receptor	0	0 / 19
dangshen	MOL001006	DNA topoisomerase I	TOP1	P11387	CHEMBL1781	Isomerase	0	0 / 2
dangshen	MOL001006	Hypoxia-inducible factor 1 alpha	HIF1A	Q16665	CHEMBL4261	Transcription factor	0	0 / 2
dangshen	MOL001006	Sigma opioid receptor	SIGMAR1	Q99720	CHEMBL287	Membrane receptor	0	5 / 5
dangshen	MOL001006	Steroid 5-alpha-reductase 2	SRD5A2	P31213	CHEMBL1856	Oxidoreductase	0	0 / 7
dangshen	MOL001006	Protein Mdm4	MDM4	O15151	CHEMBL1255126	Unclassified protein	0	2 / 0
dangshen	MOL001006	p53-binding protein Mdm-2	MDM2	Q00987	CHEMBL5023	Other nuclear protein	0	20 / 0
dangshen	MOL001006	CD81 antigen	CD81	P60033	CHEMBL1075180	Surface antigen	0	0 / 1
dangshen	MOL001006	Cyclooxygenase-2	PTGS2	P35354	CHEMBL230	Oxidoreductase	0	0 / 2
dangshen	MOL001006	Glucocorticoid receptor	NR3C1	P04150	CHEMBL2034	Nuclear receptor	0	6 / 25
dangshen	MOL001006	Cannabinoid receptor 2	CNR2	P34972	CHEMBL253	Family A G protein-coupled receptor	0	57 / 2
dangshen	MOL001006	Cyclooxygenase-1	PTGS1	P23219	CHEMBL221	Oxidoreductase	0	0 / 3
dangshen	MOL001006	Arachidonate 5-lipoxygenase	ALOX5	P09917	CHEMBL215	Oxidoreductase	0	0 / 5
dangshen	MOL001006	Beta secretase 2	BACE2	Q9Y5Z0	CHEMBL2525	Protease	0	1 / 0
dangshen	MOL001006	Dopamine D2 receptor	DRD2	P14416	CHEMBL217	Family A G protein-coupled receptor	0	14 / 0
dangshen	MOL001006	Free fatty acid receptor 1	FFAR1	O14842	CHEMBL4422	Family A G protein-coupled receptor	0	0 / 2
dangshen	MOL001006	Melatonin receptor 1A	MTNR1A	P48039	CHEMBL1945	Family A G protein-coupled receptor	0	4 / 0
dangshen	MOL001006	Melatonin receptor 1B	MTNR1B	P49286	CHEMBL1946	Family A G protein-coupled receptor	0	4 / 0
dangshen	MOL001006	Macrophage colony stimulating factor receptor	CSF1R	P07333	CHEMBL1844	Kinase	0	4 / 0
dangshen	MOL001006	Stem cell growth factor receptor	KIT	P10721	CHEMBL1936	Kinase	0	3 / 0
dangshen	MOL001006	Neurokinin 1 receptor	TACR1	P25103	CHEMBL249	Family A G protein-coupled receptor	0	5 / 0
dangshen	MOL001006	Dopamine transporter	SLC6A3	Q01959	CHEMBL238	Electrochemical transporter	0	6 / 1
dangshen	MOL001006	G-protein coupled receptor 55	GPR55	Q9Y2T6	CHEMBL1075322	Family A G protein-coupled receptor	0	1 / 0
dangshen	MOL001006	N-arachidonyl glycine receptor	GPR18	Q14330	CHEMBL2384898	Family A G protein-coupled receptor	0	1 / 0
dangshen	MOL001006	Cytochrome P450 24A1	CYP24A1	Q07973	CHEMBL4521	Enzyme	0	7 / 0
dangshen	MOL001006	Muscarinic acetylcholine receptor M4	CHRM4	P08173	CHEMBL1821	Family A G protein-coupled receptor	0	3 / 0
dangshen	MOL001006	Muscarinic acetylcholine receptor M5	CHRM5	P08912	CHEMBL2035	Family A G protein-coupled receptor	0	2 / 0
dangshen	MOL001006	Muscarinic acetylcholine receptor M3	CHRM3	P20309	CHEMBL245	Family A G protein-coupled receptor	0	1 / 0
dangshen	MOL001006	C-C chemokine receptor type 1	CCR1	P32246	CHEMBL2413	Family A G protein-coupled receptor	0	38 / 0
dangshen	MOL001006	Liver glycogen phosphorylase	PYGL	P06737	CHEMBL2568	Enzyme	0	2 / 0
dangshen	MOL001006	Protein kinase C eta	PRKCH	P24723	CHEMBL3616	Kinase	0	4 / 1
dangshen	MOL001006	MAP kinase p38 alpha	MAPK14	Q16539	CHEMBL260	Kinase	0	9 / 0
dangshen	MOL001006	Monoglyceride lipase	MGLL	Q99685	CHEMBL4191	Enzyme	0	3 / 0
dangshen	MOL001006	Anandamide amidohydrolase	FAAH	O00519	CHEMBL2243	Enzyme	0	2 / 5
dangshen	MOL001006	Protein farnesyltransferase	FNTA FNTB	P49354 P49356	CHEMBL2094108	Enzyme	0	1 / 5
dangshen	MOL001006	Thromboxane-A synthase	TBXAS1	P24557	CHEMBL1835	Cytochrome P450	0	2 / 1
dangshen	MOL001006	Sonic hedgehog protein (by homology)	SHH	Q15465	CHEMBL5602	Unclassified protein	0	0 / 10
dangshen	MOL001006	Voltage-gated potassium channel subunit Kv1.5	KCNA5	P22460	CHEMBL4306	Voltage-gated ion channel	0	1 / 0
dangshen	MOL001006	Coagulation factor XI	F11	P03951	CHEMBL2820	Protease	0	9 / 0
dangshen	MOL001006	Vasopressin V1a receptor	AVPR1A	P37288	CHEMBL1889	Family A G protein-coupled receptor	0	5 / 0
dangshen	MOL001006	Cyclin-dependent kinase 4/cyclin D1	CCND1 CDK4	P24385 P11802	CHEMBL1907601	Kinase	0	4 / 0
Dangshen	MOL002879	Protein kinase C delta	PRKCD	Q05655	CHEMBL2996	Kinase	0.115737	0 / 8
Dangshen	MOL002879	T-cell protein-tyrosine phosphatase	PTPN2	P17706	CHEMBL3807	Phosphatase	0.115737	0 / 7
Dangshen	MOL002879	Androgen Receptor (by homology)	AR	P10275	CHEMBL1871	Nuclear receptor	0.115737	0 / 1
Dangshen	MOL002879	Protein-tyrosine phosphatase 1B	PTPN1	P18031	CHEMBL335	Phosphatase	0.115737	6 / 10
Dangshen	MOL002879	Potassium channel subfamily K member 2 (by homology)	KCNK2	O95069	CHEMBL2321615	Voltage-gated ion channel	0.115737	0 / 1
dangshen	MOL002879	Squalene monooxygenase (by homology)	SQLE	Q14534	CHEMBL3592	Enzyme	0	0 / 11
dangshen	MOL002879	Cathepsin L	CTSL	P07711	CHEMBL3837	Protease	0	11 / 0
dangshen	MOL002879	Ribosomal protein S6 kinase alpha 2	RPS6KA2	Q15349	CHEMBL3906	Kinase	0	1 / 0
dangshen	MOL002879	Kappa Opioid receptor	OPRK1	P41145	CHEMBL237	Family A G protein-coupled receptor	0	0 / 4
dangshen	MOL002879	Steroidogenic factor 1	NR5A1	Q13285	CHEMBL4666	Nuclear receptor	0	3 / 0
dangshen	MOL002879	PI3-kinase p110-delta subunit	PIK3CD	O00329	CHEMBL3130	Enzyme	0	6 / 0
dangshen	MOL002879	PI3-kinase p110-beta subunit	PIK3CB	P42338	CHEMBL3145	Enzyme	0	6 / 0
dangshen	MOL002879	PI3-kinase p110-gamma subunit	PIK3CG	P48736	CHEMBL3267	Enzyme	0	6 / 0
dangshen	MOL002879	PI3-kinase p110-alpha subunit	PIK3CA	P42336	CHEMBL4005	Enzyme	0	4 / 0
dangshen	MOL002879	Protein kinase C alpha	PRKCA	P17252	CHEMBL299	Kinase	0	1 / 9
dangshen	MOL002879	Adenosine A2a receptor	ADORA2A	P29274	CHEMBL251	Family A G protein-coupled receptor	0	17 / 0
dangshen	MOL002879	Anandamide amidohydrolase	FAAH	O00519	CHEMBL2243	Enzyme	0	29 / 0
dangshen	MOL002879	Matrix metalloproteinase 13	MMP13	P45452	CHEMBL280	Protease	0	4 / 0
dangshen	MOL002879	Serine/threonine-protein kinase B-raf	BRAF	P15056	CHEMBL5145	Kinase	0	15 / 0
dangshen	MOL002879	Type-1 angiotensin II receptor	AGTR1	P30556	CHEMBL227	Family A G protein-coupled receptor	0	7 / 0
dangshen	MOL002879	Prostaglandin E synthase	PTGES	O14684	CHEMBL5658	Enzyme	0	2 / 0
dangshen	MOL002879	Dopamine transporter (by homology)	SLC6A3	Q01959	CHEMBL238	Electrochemical transporter	0	0 / 83
dangshen	MOL002879	MAP kinase ERK2	MAPK1	P28482	CHEMBL4040	Kinase	0	5 / 0
dangshen	MOL002879	Leukocyte elastase	ELANE	P08246	CHEMBL248	Protease	0	12 / 0
dangshen	MOL002879	Gonadotropin-releasing hormone receptor	GNRHR	P30968	CHEMBL1855	Family A G protein-coupled receptor	0	11 / 0
dangshen	MOL002879	Poly [ADP-ribose] polymerase-1	PARP1	P09874	CHEMBL3105	Enzyme	0	2 / 0
dangshen	MOL002879	Tyrosine-protein kinase receptor FLT3	FLT3	P36888	CHEMBL1974	Kinase	0	5 / 0
dangshen	MOL002879	Sodium channel protein type V alpha subunit	SCN5A	Q14524	CHEMBL1980	Voltage-gated ion channel	0	1 / 0
dangshen	MOL002879	Sodium channel protein type II alpha subunit	SCN2A	Q99250	CHEMBL4187	Voltage-gated ion channel	0	2 / 0
dangshen	MOL002879	2-acylglycerol O-acyltransferase 2	MOGAT2	Q3SYC2	CHEMBL2439944	Transferase	0	12 / 0
dangshen	MOL002879	Sodium/calcium exchanger 1	SLC8A1	P32418	CHEMBL4076	Electrochemical transporter	0	19 / 0
dangshen	MOL002879	Induced myeloid leukemia cell differentiation protein Mcl-1	MCL1	Q07820	CHEMBL4361	Other cytosolic protein	0	2 / 0
dangshen	MOL002879	Apoptosis regulator Bcl-X	BCL2L1	Q07817	CHEMBL4625	Other ion channel	0	3 / 0
dangshen	MOL002879	Apoptosis regulator Bcl-2	BCL2	P10415	CHEMBL4860	Other ion channel	0	3 / 0
dangshen	MOL002879	Purinergic receptor P2Y12	P2RY12	Q9H244	CHEMBL2001	Family A G protein-coupled receptor	0	5 / 0
dangshen	MOL002879	Plasminogen activator inhibitor-1	SERPINE1	P05121	CHEMBL3475	Secreted protein	0	0 / 5
dangshen	MOL002879	Serotonin 1a (5-HT1a) receptor	HTR1A	P08908	CHEMBL214	Family A G protein-coupled receptor	0	6 / 0
dangshen	MOL002879	Histone acetyltransferase p300	EP300	Q09472	CHEMBL3784	Writer	0	1 / 0
dangshen	MOL002879	Histone acetyltransferase PCAF	KAT2B	Q92831	CHEMBL5500	Writer	0	1 / 0
dangshen	MOL002879	Histone acetyltransferase GCN5	KAT2A	Q92830	CHEMBL5501	Writer	0	1 / 0
dangshen	MOL002879	Serine/threonine-protein kinase TAO1	TAOK1	Q7L7X3	CHEMBL5261	Kinase	0	9 / 0
dangshen	MOL002879	Serine/threonine-protein kinase TAO3	TAOK3	Q9H2K8	CHEMBL5701	Kinase	0	7 / 0
dangshen	MOL002879	Epidermal growth factor receptor erbB1	EGFR	P00533	CHEMBL203	Kinase	0	9 / 0
dangshen	MOL002879	Fibroblast growth factor receptor 1	FGFR1	P11362	CHEMBL3650	Kinase	0	7 / 0
dangshen	MOL002879	Heparanase	HPSE	Q9Y251	CHEMBL3921	Enzyme	0	3 / 0
dangshen	MOL002879	Carnitine O-palmitoyltransferase 1, liver isoform	CPT1A	P50416	CHEMBL1293194	Enzyme	0	3 / 0
dangshen	MOL002879	Plectin	PLEC	Q15149	CHEMBL1293240	Unclassified protein	0	1 / 0
dangshen	MOL002879	Phosphodiesterase 10A	PDE10A	Q9Y233	CHEMBL4409	Phosphodiesterase	0	14 / 0
dangshen	MOL002879	ADAMTS4	ADAMTS4	O75173	CHEMBL2318	Protease	0	4 / 0
dangshen	MOL002879	MAP kinase p38 alpha	MAPK14	Q16539	CHEMBL260	Kinase	0	12 / 0
dangshen	MOL002879	Beta-glucocerebrosidase	GBA	P04062	CHEMBL2179	Enzyme	0	1 / 0
dangshen	MOL002879	Glutaminase kidney isoform, mitochondrial	GLS	O94925	CHEMBL2146302	Enzyme	0	4 / 0
dangshen	MOL002879	NAD-dependent deacetylase sirtuin 2	SIRT2	Q8IXJ6	CHEMBL4462	Eraser	0	2 / 0
dangshen	MOL002879	Orexin receptor 2	HCRTR2	O43614	CHEMBL4792	Family A G protein-coupled receptor	0	1 / 0
dangshen	MOL002879	Orexin receptor 1	HCRTR1	O43613	CHEMBL5113	Family A G protein-coupled receptor	0	1 / 0
dangshen	MOL002879	Lysine-specific histone demethylase 1	KDM1A	O60341	CHEMBL6136	Eraser	0	1 / 0
dangshen	MOL002879	Dual specificity protein phosphatase 3	DUSP3	P51452	CHEMBL2635	Phosphatase	0	1 / 0
dangshen	MOL002879	Vascular endothelial growth factor receptor 3	FLT4	P35916	CHEMBL1955	Kinase	0	2 / 0
dangshen	MOL002879	Phosphodiesterase 4A	PDE4A	P27815	CHEMBL254	Phosphodiesterase	0	1 / 0
dangshen	MOL002879	C-C chemokine receptor type 5	CCR5	P51681	CHEMBL274	Family A G protein-coupled receptor	0	3 / 0
dangshen	MOL002879	Phosphodiesterase 4B	PDE4B	Q07343	CHEMBL275	Phosphodiesterase	0	2 / 0
dangshen	MOL002879	Acyl-CoA desaturase	SCD	O00767	CHEMBL5555	Enzyme	0	16 / 0
dangshen	MOL002879	MAP kinase-activated protein kinase 2	MAPKAPK2	P49137	CHEMBL2208	Kinase	0	6 / 0
dangshen	MOL002879	Tyrosine-protein kinase LCK	LCK	P06239	CHEMBL258	Kinase	0	10 / 0
dangshen	MOL002879	Nerve growth factor receptor Trk-A	NTRK1	P04629	CHEMBL2815	Kinase	0	17 / 0
dangshen	MOL002879	Acetyl-CoA carboxylase 1	ACACA	Q13085	CHEMBL3351	Enzyme	0	3 / 0
dangshen	MOL002879	Angiotensin II receptor	AGTR2	P50052	CHEMBL4607	Family A G protein-coupled receptor	0	4 / 0
dangshen	MOL002879	Serine/threonine-protein kinase Aurora-A	AURKA	O14965	CHEMBL4722	Kinase	0	8 / 0
dangshen	MOL002879	Acetyl-CoA carboxylase 2	ACACB	O00763	CHEMBL4829	Ligase	0	14 / 0
dangshen	MOL002879	Neuronal acetylcholine receptor protein alpha-7 subunit	CHRNA7	P36544	CHEMBL2492	Ligand-gated ion channel	0	0 / 6
dangshen	MOL002879	Niemann-Pick C1-like protein 1	NPC1L1	Q9UHC9	CHEMBL2027	Other membrane protein	0	15 / 0
dangshen	MOL002879	Kinesin-1 heavy chain/ Tyrosine-protein kinase receptor RET	RET	P07949	CHEMBL2041	Kinase	0	1 / 0
dangshen	MOL002879	Cyclooxygenase-2	PTGS2	P35354	CHEMBL230	Oxidoreductase	0	6 / 0
dangshen	MOL002879	Arachidonate 15-lipoxygenase	ALOX15	P16050	CHEMBL2903	Enzyme	0	5 / 0
dangshen	MOL002879	Cyclin-dependent kinase 4/cyclin D1	CCND1 CDK4	P24385 P11802	CHEMBL1907601	Kinase	0	2 / 0
dangshen	MOL002879	Cyclin-dependent kinase 1/cyclin B1	CDK1 CCNB1	P06493 P14635	CHEMBL1907602	Other cytosolic protein	0	3 / 0
dangshen	MOL002879	Receptor protein-tyrosine kinase erbB-2	ERBB2	P04626	CHEMBL1824	Kinase	0	6 / 0
dangshen	MOL002879	Thyroid hormone receptor beta-1	THRB	P10828	CHEMBL1947	Nuclear receptor	0	3 / 0
dangshen	MOL002879	Cyclin T1	CCNT1	O60563	CHEMBL2108	Other cytosolic protein	0	4 / 0
dangshen	MOL002879	Sterol regulatory element-binding protein 2	SREBF2	Q12772	CHEMBL1795166	Unclassified protein	0	4 / 0
dangshen	MOL002879	Glycogen synthase kinase-3 beta	GSK3B	P49841	CHEMBL262	Kinase	0	4 / 0
dangshen	MOL002879	Cathepsin K	CTSK	P43235	CHEMBL268	Protease	0	27 / 0
dangshen	MOL002879	Cathepsin S	CTSS	P25774	CHEMBL2954	Protease	0	9 / 0
dangshen	MOL002879	Bradykinin B1 receptor	BDKRB1	P46663	CHEMBL4308	Family A G protein-coupled receptor	0	5 / 0
dangshen	MOL002879	Endothelial lipase	LIPG	Q9Y5X9	CHEMBL5080	Hydrolase	0	1 / 0
dangshen	MOL002879	Cathepsin (B and K)	CTSB	P07858	CHEMBL4072	Protease	0	7 / 0
dangshen	MOL002879	TGF-beta receptor type I	TGFBR1	P36897	CHEMBL4439	Kinase	0	2 / 0
dangshen	MOL002879	TRAF2- and NCK-interacting kinase	TNIK	Q9UKE5	CHEMBL4527	Kinase	0	4 / 0
dangshen	MOL002879	Tyrosine-protein kinase receptor TYRO3	TYRO3	Q06418	CHEMBL5314	Kinase	0	5 / 0
dangshen	MOL002879	Adenosine A1 receptor	ADORA1	P30542	CHEMBL226	Family A G protein-coupled receptor	0	17 / 0
dangshen	MOL002879	ADAMTS5	ADAMTS5	Q9UNA0	CHEMBL2285	Protease	0	3 / 0
dangshen	MOL002879	Adenosine A2b receptor	ADORA2B	P29275	CHEMBL255	Family A G protein-coupled receptor	0	18 / 0
dangshen	MOL002879	PI4-kinase beta subunit	PI4KB	Q9UBF8	CHEMBL3268	Enzyme	0	1 / 0
dangshen	MOL002879	Dual specificty protein kinase CLK1	CLK1	P49759	CHEMBL4224	Kinase	0	1 / 0
dangshen	MOL002879	Dual specificity protein kinase CLK2	CLK2	P49760	CHEMBL4225	Kinase	0	1 / 0
dangshen	MOL002879	Diacylglycerol O-acyltransferase 1	DGAT1	O75907	CHEMBL6009	Enzyme	0	2 / 0
dangshen	MOL002879	Glucocorticoid receptor	NR3C1	P04150	CHEMBL2034	Nuclear receptor	0	2 / 0
dangshen	MOL002879	Cyclooxygenase-1	PTGS1	P23219	CHEMBL221	Oxidoreductase	0	2 / 0
dangshen	MOL002879	Dipeptidyl peptidase IV	DPP4	P27487	CHEMBL284	Protease	0	6 / 0
dangshen	MOL002879	Bile acid receptor FXR	NR1H4	Q96RI1	CHEMBL2047	Nuclear receptor	0	1 / 0
Dangshen	MOL003036	Cytochrome P450 51 (by homology)	CYP51A1	Q16850	CHEMBL3849	Cytochrome P450	0.664324	6 / 2
Dangshen	MOL003036	HMG-CoA reductase	HMGCR	P04035	CHEMBL402	Oxidoreductase	0.664324	79 / 7
Dangshen	MOL003036	LXR-alpha	NR1H3	Q13133	CHEMBL2808	Nuclear receptor	0.630968	18 / 20
Dangshen	MOL003036	Niemann-Pick C1-like protein 1	NPC1L1	Q9UHC9	CHEMBL2027	Other membrane protein	0.589276	8 / 13
Dangshen	MOL003036	Cytochrome P450 17A1	CYP17A1	P05093	CHEMBL3522	Cytochrome P450	0.506041	53 / 50
Dangshen	MOL003036	Androgen Receptor	AR	P10275	CHEMBL1871	Nuclear receptor	0.497677	40 / 102
Dangshen	MOL003036	Sterol regulatory element-binding protein 2	SREBF2	Q12772	CHEMBL1795166	Unclassified protein	0.456018	0 / 1
Dangshen	MOL003036	Cytochrome P450 19A1	CYP19A1	P11511	CHEMBL1978	Cytochrome P450	0.431039	19 / 161
Dangshen	MOL003036	Nuclear receptor ROR-gamma	RORC	P51449	CHEMBL1741186	Nuclear receptor	0.356071	10 / 9
Dangshen	MOL003036	Estrogen receptor alpha	ESR1	P03372	CHEMBL206	Nuclear receptor	0.314405	10 / 39
Dangshen	MOL003036	Estrogen receptor beta	ESR2	Q92731	CHEMBL242	Nuclear receptor	0.314405	8 / 47
Dangshen	MOL003036	Testis-specific androgen-binding protein	SHBG	P04278	CHEMBL3305	Secreted protein	0.239432	1 / 48
Dangshen	MOL003036	Norepinephrine transporter	SLC6A2	P23975	CHEMBL222	Electrochemical transporter	0.131156	6 / 2
Dangshen	MOL003036	Corticosteroid binding globulin	SERPINA6	P08185	CHEMBL2421	Secreted protein	0.114495	0 / 18
Dangshen	MOL003036	Protein-tyrosine phosphatase 1B	PTPN1	P18031	CHEMBL335	Phosphatase	0.114495	17 / 47
Dangshen	MOL003036	Muscarinic acetylcholine receptor M2	CHRM2	P08172	CHEMBL211	Family A G protein-coupled receptor	0.114495	12 / 1
Dangshen	MOL003036	Nuclear receptor ROR-alpha	RORA	P35398	CHEMBL5868	Nuclear receptor	0.114495	3 / 3
Dangshen	MOL003036	Butyrylcholinesterase	BCHE	P06276	CHEMBL1914	Hydrolase	0.114495	5 / 2
Dangshen	MOL003036	Serotonin transporter	SLC6A4	P31645	CHEMBL228	Electrochemical transporter	0.106166	22 / 5
Dangshen	MOL003036	Acetylcholinesterase	ACHE	P22303	CHEMBL220	Hydrolase	0.106166	4 / 1
Dangshen	MOL003036	Cytochrome P450 2C19	CYP2C19	P33261	CHEMBL3622	Cytochrome P450	0.106166	2 / 3
Dangshen	MOL003036	Glucose-6-phosphate 1-dehydrogenase	G6PD	P11413	CHEMBL5347	Enzyme	0.106166	4 / 2
Dangshen	MOL003036	Dual specificity phosphatase Cdc25A	CDC25A	P30304	CHEMBL3775	Phosphatase	0.106166	9 / 11
Dangshen	MOL003036	Carboxylesterase 2	CES2	O00748	CHEMBL3180	Enzyme	0.106166	5 / 10
Dangshen	MOL003036	LXR-beta	NR1H2	P55055	CHEMBL4093	Nuclear receptor	0.106166	4 / 1
Dangshen	MOL003036	Vitamin D receptor	VDR	P11473	CHEMBL1977	Nuclear receptor	0.106166	12 / 49
Dangshen	MOL003036	Prostanoid EP1 receptor (by homology)	PTGER1	P34995	CHEMBL1811	Family A G protein-coupled receptor	0.106166	0 / 9
Dangshen	MOL003036	Prostanoid EP2 receptor (by homology)	PTGER2	P43116	CHEMBL1881	Family A G protein-coupled receptor	0.106166	0 / 20
Dangshen	MOL003036	11-beta-hydroxysteroid dehydrogenase 1	HSD11B1	P28845	CHEMBL4235	Enzyme	0.106166	129 / 23
Dangshen	MOL003036	Peroxisome proliferator-activated receptor delta	PPARD	Q03181	CHEMBL3979	Nuclear receptor	0.106166	0 / 8
Dangshen	MOL003036	Glycine receptor subunit alpha-1	GLRA1	P23415	CHEMBL5845	Ligand-gated ion channel	0.106166	1 / 1
Dangshen	MOL003036	Squalene monooxygenase	SQLE	Q14534	CHEMBL3592	Enzyme	0.106166	0 / 4
Dangshen	MOL003036	Nuclear receptor subfamily 1 group I member 3 (by homology)	NR1I3	Q14994	CHEMBL5503	Nuclear receptor	0.106166	2 / 3
Dangshen	MOL003036	Anti-estrogen binding site (AEBS) (by homology)	DHCR7	Q9UBM7	CHEMBL2169735	Enzyme	0.106166	3 / 5
Dangshen	MOL003036	Protein-tyrosine phosphatase 1C	PTPN6	P29350	CHEMBL3166	Phosphatase	0.106166	0 / 1
Dangshen	MOL003036	Glucocorticoid receptor	NR3C1	P04150	CHEMBL2034	Nuclear receptor	0.106166	78 / 25
Dangshen	MOL003036	Thromboxane-A synthase	TBXAS1	P24557	CHEMBL1835	Cytochrome P450	0.106166	3 / 1
Dangshen	MOL003036	Glucagon receptor	GCGR	P47871	CHEMBL1985	Family B G protein-coupled receptor	0.106166	22 / 0
Dangshen	MOL003036	Nitric oxide synthase, inducible (by homology)	NOS2	P35228	CHEMBL4481	Enzyme	0.106166	2 / 16
Dangshen	MOL003036	11-beta-hydroxysteroid dehydrogenase 2	HSD11B2	P80365	CHEMBL3746	Enzyme	0.106166	9 / 8
Dangshen	MOL003036	DNA polymerase beta (by homology)	POLB	P06746	CHEMBL2392	Enzyme	0.106166	0 / 6
dangshen	MOL003036	Prolyl endopeptidase	PREP	P48147	CHEMBL3202	Protease	0	0 / 1
dangshen	MOL003036	Protein Mdm4	MDM4	O15151	CHEMBL1255126	Unclassified protein	0	5 / 0
dangshen	MOL003036	p53-binding protein Mdm-2	MDM2	Q00987	CHEMBL5023	Other nuclear protein	0	40 / 0
dangshen	MOL003036	Dopamine D2 receptor	DRD2	P14416	CHEMBL217	Family A G protein-coupled receptor	0	17 / 0
dangshen	MOL003036	T-cell protein-tyrosine phosphatase	PTPN2	P17706	CHEMBL3807	Phosphatase	0	1 / 15
dangshen	MOL003036	Prostanoid EP4 receptor (by homology)	PTGER4	P35408	CHEMBL1836	Family A G protein-coupled receptor	0	0 / 6
dangshen	MOL003036	Indoleamine 2,3-dioxygenase	IDO1	P14902	CHEMBL4685	Enzyme	0	0 / 1
dangshen	MOL003036	Potassium-transporting ATPase alpha chain 2	ATP12A	P54707	CHEMBL2933	Primary active transporter	0	0 / 2
dangshen	MOL003036	C-C chemokine receptor type 1	CCR1	P32246	CHEMBL2413	Family A G protein-coupled receptor	0	68 / 0
dangshen	MOL003036	Sigma opioid receptor	SIGMAR1	Q99720	CHEMBL287	Membrane receptor	0	11 / 5
dangshen	MOL003036	Prostaglandin E synthase	PTGES	O14684	CHEMBL5658	Enzyme	0	2 / 10
dangshen	MOL003036	Prostanoid IP receptor	PTGIR	P43119	CHEMBL1995	Family A G protein-coupled receptor	0	0 / 6
dangshen	MOL003036	Vasopressin V1a receptor	AVPR1A	P37288	CHEMBL1889	Family A G protein-coupled receptor	0	10 / 0
dangshen	MOL003036	Protein kinase C delta	PRKCD	Q05655	CHEMBL2996	Kinase	0	17 / 0
dangshen	MOL003036	Anti-estrogen binding site (AEBS)	DHCR7 EBP	Q9UBM7 Q15125	CHEMBL612409	Enzyme	0	0 / 1
dangshen	MOL003036	Fatty acid binding protein adipocyte	FABP4	P15090	CHEMBL2083	Fatty acid binding protein family	0	0 / 3
dangshen	MOL003036	Fatty acid binding protein muscle	FABP3	P05413	CHEMBL3344	Fatty acid binding protein family	0	0 / 4
dangshen	MOL003036	Fatty acid binding protein epidermal	FABP5	Q01469	CHEMBL3674	Fatty acid binding protein family	0	0 / 1
dangshen	MOL003036	Fatty acid-binding protein, liver	FABP1	P07148	CHEMBL5421	Fatty acid binding protein family	0	0 / 3
dangshen	MOL003036	Monoglyceride lipase	MGLL	Q99685	CHEMBL4191	Enzyme	0	4 / 0
dangshen	MOL003036	Dual specificity phosphatase Cdc25B	CDC25B	P30305	CHEMBL4804	Phosphatase	0	8 / 7
dangshen	MOL003036	MAP kinase ERK1	MAPK3	P27361	CHEMBL3385	Kinase	0	0 / 1
dangshen	MOL003036	Protein-tyrosine phosphatase 2C	PTPN11	Q06124	CHEMBL3864	Phosphatase	0	0 / 1
dangshen	MOL003036	Aldo-keto reductase family 1 member B10	AKR1B10	O60218	CHEMBL5983	Enzyme	0	0 / 6
dangshen	MOL003036	Muscarinic acetylcholine receptor M4	CHRM4	P08173	CHEMBL1821	Family A G protein-coupled receptor	0	8 / 0
dangshen	MOL003036	Cannabinoid receptor 1 (by homology)	CNR1	P21554	CHEMBL218	Family A G protein-coupled receptor	0	153 / 16
dangshen	MOL003036	Neurokinin 1 receptor	TACR1	P25103	CHEMBL249	Family A G protein-coupled receptor	0	23 / 0
dangshen	MOL003036	Cytochrome P450 11B1	CYP11B1	P15538	CHEMBL1908	Cytochrome P450	0	2 / 0
dangshen	MOL003036	Cytochrome P450 11B2	CYP11B2	P19099	CHEMBL2722	Cytochrome P450	0	3 / 0
dangshen	MOL003036	Cytochrome P450 3A4	CYP3A4	P08684	CHEMBL340	Cytochrome P450	0	4 / 0
dangshen	MOL003036	Receptor-type tyrosine-protein phosphatase F (LAR)	PTPRF	P10586	CHEMBL3521	Membrane receptor	0	0 / 1
dangshen	MOL003036	Phospholipase A2 group 1B	PLA2G1B	P04054	CHEMBL4426	Enzyme	0	0 / 1
dangshen	MOL003036	Low molecular weight phosphotyrosine protein phosphatase	ACP1	P24666	CHEMBL4903	Phosphatase	0	0 / 1
dangshen	MOL003036	Beta secretase 2	BACE2	Q9Y5Z0	CHEMBL2525	Protease	0	1 / 0
dangshen	MOL003036	MAP kinase p38 alpha	MAPK14	Q16539	CHEMBL260	Kinase	0	15 / 0
dangshen	MOL003036	Beta amyloid A4 protein	APP	P05067	CHEMBL2487	Membrane receptor	0	10 / 0
dangshen	MOL003036	Interleukin-6 receptor subunit beta	IL6ST	P40189	CHEMBL3124734	Membrane receptor	0	1 / 0
dangshen	MOL003036	Acyl-CoA desaturase	SCD	O00767	CHEMBL5555	Enzyme	0	0 / 1
dangshen	MOL003036	Acetyl-CoA carboxylase 2	ACACB	O00763	CHEMBL4829	Ligase	0	18 / 0
dangshen	MOL003036	Muscarinic acetylcholine receptor M1	CHRM1	P11229	CHEMBL216	Family A G protein-coupled receptor	0	14 / 0
dangshen	MOL003036	C5a anaphylatoxin chemotactic receptor	C5AR1	P21730	CHEMBL2373	Family A G protein-coupled receptor	0	7 / 0
dangshen	MOL003036	Muscarinic acetylcholine receptor M3	CHRM3	P20309	CHEMBL245	Family A G protein-coupled receptor	0	13 / 0
dangshen	MOL003036	Nociceptin receptor	OPRL1	P41146	CHEMBL2014	Family A G protein-coupled receptor	0	8 / 0
dangshen	MOL003036	Mu opioid receptor	OPRM1	P35372	CHEMBL233	Family A G protein-coupled receptor	0	15 / 0
dangshen	MOL003036	Protein kinase C gamma	PRKCG	P05129	CHEMBL2938	Kinase	0	7 / 0
dangshen	MOL003036	Protein kinase C epsilon	PRKCE	Q02156	CHEMBL3582	Kinase	0	8 / 0
dangshen	MOL003036	Protein kinase C theta	PRKCQ	Q04759	CHEMBL3920	Kinase	0	6 / 0
dangshen	MOL003036	GABA-B receptor (by homology)	GABBR1	Q9UBS5	CHEMBL2064	Family C G protein-coupled receptor	0	2 / 0
dangshen	MOL003036	Oxytocin receptor (by homology)	OXTR	P30559	CHEMBL2049	Family A G protein-coupled receptor	0	27 / 0
dangshen	MOL003036	Serotonin 2b (5-HT2b) receptor	HTR2B	P41595	CHEMBL1833	Family A G protein-coupled receptor	0	2 / 0
dangshen	MOL003036	Platelet activating factor receptor	PTAFR	P25105	CHEMBL250	Family A G protein-coupled receptor	0	4 / 0
dangshen	MOL003036	Metabotropic glutamate receptor 2	GRM2	Q14416	CHEMBL5137	Family C G protein-coupled receptor	0	4 / 0
dangshen	MOL003036	Insulin-like growth factor I receptor	IGF1R	P08069	CHEMBL1957	Kinase	0	6 / 0
dangshen	MOL003036	Tyrosine-protein kinase SRC	SRC	P12931	CHEMBL267	Kinase	0	6 / 0
dangshen	MOL003036	Vascular endothelial growth factor receptor 2	KDR	P35968	CHEMBL279	Kinase	0	13 / 0
dangshen	MOL003036	Coagulation factor XI	F11	P03951	CHEMBL2820	Protease	0	8 / 0
dangshen	MOL003036	Neuropeptide Y receptor type 2	NPY2R	P49146	CHEMBL4018	Family A G protein-coupled receptor	0	4 / 0
dangshen	MOL003036	ALK tyrosine kinase receptor	ALK	Q9UM73	CHEMBL4247	Kinase	0	6 / 0
dangshen	MOL003036	DNA topoisomerase II alpha	TOP2A	P11388	CHEMBL1806	Isomerase	0	0 / 2
Dangshen	MOL003896	Cytochrome P450 19A1	CYP19A1	P11511	CHEMBL1978	Cytochrome P450	0.141522	218 / 33
Dangshen	MOL003896	ATP-binding cassette sub-family G member 2	ABCG2	Q9UNQ0	CHEMBL5393	Primary active transporter	0.116965	39 / 47
Dangshen	MOL003896	Carbonic anhydrase XII	CA12	O43570	CHEMBL3242	Lyase	0.116965	152 / 26
Dangshen	MOL003896	Norepinephrine transporter	SLC6A2	P23975	CHEMBL222	Electrochemical transporter	0.116965	8 / 1
Dangshen	MOL003896	Carbonic anhydrase IV	CA4	P22748	CHEMBL3729	Lyase	0.116965	23 / 13
Dangshen	MOL003896	Monoamine oxidase A	MAOA	P21397	CHEMBL1951	Oxidoreductase	0.108771	170 / 45
Dangshen	MOL003896	Estradiol 17-beta-dehydrogenase 2	HSD17B2	P37059	CHEMBL2789	Enzyme	0.108771	22 / 3
Dangshen	MOL003896	Carbonic anhydrase VII	CA7	P43166	CHEMBL2326	Lyase	0.108771	75 / 17
Dangshen	MOL003896	Carbonyl reductase [NADPH] 1	CBR1	P16152	CHEMBL5586	Enzyme	0.108771	0 / 3
Dangshen	MOL003896	P-glycoprotein 1	ABCB1	P08183	CHEMBL4302	Primary active transporter	0.108771	32 / 43
Dangshen	MOL003896	Epidermal growth factor receptor erbB1	EGFR	P00533	CHEMBL203	Kinase	0.108771	293 / 28
Dangshen	MOL003896	Adenosine A1 receptor	ADORA1	P30542	CHEMBL226	Family A G protein-coupled receptor	0.108771	231 / 26
Dangshen	MOL003896	Adenosine A2a receptor	ADORA2A	P29274	CHEMBL251	Family A G protein-coupled receptor	0.108771	239 / 15
Dangshen	MOL003896	Serotonin 2a (5-HT2a) receptor	HTR2A	P28223	CHEMBL224	Family A G protein-coupled receptor	0.100579	123 / 1
Dangshen	MOL003896	Serotonin 2c (5-HT2c) receptor	HTR2C	P28335	CHEMBL225	Family A G protein-coupled receptor	0.100579	118 / 2
Dangshen	MOL003896	Cyclooxygenase-1	PTGS1	P23219	CHEMBL221	Oxidoreductase	0.100579	22 / 5
Dangshen	MOL003896	Monoamine oxidase B	MAOB	P27338	CHEMBL2039	Oxidoreductase	0.100579	357 / 109
Dangshen	MOL003896	Carbonic anhydrase II	CA2	P00918	CHEMBL205	Lyase	0.100579	277 / 26
Dangshen	MOL003896	Carbonic anhydrase I	CA1	P00915	CHEMBL261	Lyase	0.100579	225 / 24
Dangshen	MOL003896	Estrogen receptor alpha	ESR1	P03372	CHEMBL206	Nuclear receptor	0.100579	9 / 72
Dangshen	MOL003896	Thromboxane-A synthase	TBXAS1	P24557	CHEMBL1835	Cytochrome P450	0.100579	18 / 2
Dangshen	MOL003896	Estradiol 17-beta-dehydrogenase 1	HSD17B1	P14061	CHEMBL3181	Enzyme	0.100579	13 / 4
Dangshen	MOL003896	Maltase-glucoamylase	MGAM	O43451	CHEMBL2074	Hydrolase	0.100579	0 / 1
Dangshen	MOL003896	Estrogen-related receptor beta	ESRRB	O95718	CHEMBL3751	Nuclear receptor	0.100579	0 / 1
Dangshen	MOL003896	6-phosphofructo-2-kinase/fructose-2,6-bisphosphatase 3	PFKFB3	Q16875	CHEMBL2331053	Enzyme	0.100579	155 / 2
Dangshen	MOL003896	Aldehyde dehydrogenase	ALDH2	P05091	CHEMBL1935	Oxidoreductase	0.100579	2 / 40
Dangshen	MOL003896	Tankyrase-1	TNKS	O95271	CHEMBL6164	Enzyme	0.100579	47 / 24
Dangshen	MOL003896	Estrogen-related receptor alpha	ESRRA	P11474	CHEMBL3429	Nuclear receptor	0.100579	1 / 2
Dangshen	MOL003896	Nerve growth factor receptor Trk-A	NTRK1	P04629	CHEMBL2815	Kinase	0.100579	94 / 0
Dangshen	MOL003896	Tyrosinase (by homology)	TYR	P14679	CHEMBL1973	Oxidoreductase	0.100579	0 / 2
Dangshen	MOL003896	Interleukin-2	IL2	P60568	CHEMBL5880	Secreted protein	0.100579	1 / 5
Dangshen	MOL003896	Estrogen receptor beta	ESR2	Q92731	CHEMBL242	Nuclear receptor	0.100579	18 / 50
Dangshen	MOL003896	Cytochrome P450 1B1	CYP1B1	Q16678	CHEMBL4878	Cytochrome P450	0.100579	12 / 39
Dangshen	MOL003896	Phosphoglycerate kinase 1	PGK1	P00558	CHEMBL2886	Enzyme	0.100579	22 / 0
Dangshen	MOL003896	Monoglyceride lipase	MGLL	Q99685	CHEMBL4191	Enzyme	0.100579	29 / 0
Dangshen	MOL003896	Acetylcholinesterase	ACHE	P22303	CHEMBL220	Hydrolase	0.100579	87 / 65
Dangshen	MOL003896	Vascular endothelial growth factor receptor 1 (by homology)	FLT1	P17948	CHEMBL1868	Kinase	0.100579	57 / 0
Dangshen	MOL003896	Receptor-type tyrosine-protein phosphatase S	PTPRS	Q13332	CHEMBL2396508	Phosphatase	0.100579	0 / 8
Dangshen	MOL003896	Metabotropic glutamate receptor 5	GRM5	P41594	CHEMBL3227	Family C G protein-coupled receptor	0.100579	257 / 0
Dangshen	MOL003896	Metabotropic glutamate receptor 1	GRM1	Q13255	CHEMBL3772	Family C G protein-coupled receptor	0.100579	52 / 0
Dangshen	MOL003896	Neurokinin 1 receptor	TACR1	P25103	CHEMBL249	Family A G protein-coupled receptor	0.100579	61 / 0
Dangshen	MOL003896	Induced myeloid leukemia cell differentiation protein Mcl-1	MCL1	Q07820	CHEMBL4361	Other cytosolic protein	0.100579	7 / 4
Dangshen	MOL003896	Matrix metalloproteinase 1	MMP1	P03956	CHEMBL332	Protease	0.100579	51 / 0
Dangshen	MOL003896	Protein farnesyltransferase	FNTA FNTB	P49354 P49356	CHEMBL2094108	Enzyme	0.100579	173 / 0
Dangshen	MOL003896	High-affinity choline transporter (by homology)	SLC5A7	Q9GZV3	CHEMBL4507	Electrochemical transporter	0.100579	6 / 0
Dangshen	MOL003896	N-acylsphingosine-amidohydrolase	NAAA	Q02083	CHEMBL4349	Enzyme	0.100579	45 / 0
Dangshen	MOL003896	Transient receptor potential cation channel subfamily M member 8 (by homology)	TRPM8	Q7Z2W7	CHEMBL1075319	Voltage-gated ion channel	0.100579	23 / 0
Dangshen	MOL003896	Corticotropin releasing factor receptor 1 (by homology)	CRHR1	P34998	CHEMBL1800	Family B G protein-coupled receptor	0.100579	263 / 0
Dangshen	MOL003896	Platelet-derived growth factor receptor	PDGFRA PDGFRB	P16234 P09619	CHEMBL2095189	Kinase	0.100579	50 / 0
Dangshen	MOL003896	Orexin receptor 2	HCRTR2	O43614	CHEMBL4792	Family A G protein-coupled receptor	0.100579	330 / 0
Dangshen	MOL003896	Orexin receptor 1	HCRTR1	O43613	CHEMBL5113	Family A G protein-coupled receptor	0.100579	268 / 0
Dangshen	MOL003896	Serum paraoxonase/arylesterase 1	PON1	P27169	CHEMBL3167	Enzyme	0.100579	0 / 1
Dangshen	MOL003896	Serotonin 7 (5-HT7) receptor	HTR7	P34969	CHEMBL3155	Family A G protein-coupled receptor	0.100579	28 / 0
Dangshen	MOL003896	Cytochrome P450 17A1	CYP17A1	P05093	CHEMBL3522	Cytochrome P450	0.100579	68 / 0
Dangshen	MOL003896	Urotensin II receptor	UTS2R	Q9UKP6	CHEMBL3764	Family A G protein-coupled receptor	0.100579	1 / 0
Dangshen	MOL003896	P2X purinoceptor 7	P2RX7	Q99572	CHEMBL4805	Ligand-gated ion channel	0.100579	206 / 0
Dangshen	MOL003896	Melatonin receptor 1B	MTNR1B	P49286	CHEMBL1946	Family A G protein-coupled receptor	0.100579	423 / 0
Dangshen	MOL003896	Protein kinase C gamma (by homology)	PRKCG	P05129	CHEMBL2938	Kinase	0.100579	23 / 0
Dangshen	MOL003896	Protein kinase C alpha	PRKCA	P17252	CHEMBL299	Kinase	0.100579	29 / 0
Dangshen	MOL003896	Lipoxin A4 receptor	FPR2	P25090	CHEMBL4227	Family A G protein-coupled receptor	0.100579	17 / 0
[truncated: 8,040 more rows]

## Sheet: Duplicate Removal
815 target proteins after deletion of duplicates
CNR1
HSD11B1
FAAH
CYP19A1
CYP17A1
AR
CNR2
HSD11B2
MCL1
BCL2
PTGES
PTPN1
F2R
TAS2R31
ALOX5AP
AURKB
JAK2
ROCK2
GRIN1
CA14
TNKS
PGR
CXCR3
SCN9A
EPHB4
NR3C2
QPCT
ROCK1
HMGCR
HPGD
CRHR1
HRH2
SOAT1
C5AR1
HRH3
HRH4
GCGR
MAPK14
RBP4
CYP11B1
CYP11B2
MGLL
NPY5R
ACACB
PARP2
ABL1
YES1
ABHD6
LCK
SRC
DGAT1
CTSK
CTSS
NR3C1
BRD4
BRD2
BRD3
RARA
AKR1C1
HSD17B2
FABP4
FABP3
PPARD
GCK
IDH1
NAMPT
SLC5A1
NOD1
NOD2
PIM1
GABRA5
GABRA1
AVPR1A
CA2
TSPO
AKR1B1
ADORA1
TNF
IL2
XDH
PTGS2
RPS6KA3
EGFR
ACHE
NQO2
NMUR2
ADRA2A
ADRA2C
NOX4
ALDH2
CYP51A1
NR1H3
NPC1L1
SREBF2
RORC
ESR1
ESR2
SHBG
SLC6A2
SERPINA6
CHRM2
RORA
BCHE
SLC6A4
CYP2C19
G6PD
CDC25A
CES2
NR1H2
VDR
PTGER1
PTGER2
GLRA1
SQLE
NR1I3
DHCR7
PTPN6
TBXAS1
NOS2
POLB
CA7
CA12
CA4
CYP1B1
ABCC1
ABCG2
ALOX15
ALOX12
IGF1R
AVPR2
MAOA
FLT3
F2
ALOX5
DRD4
GLO1
MPO
PIK3R1
ADORA2A
DAPK1
PYGL
CA1
GSK3B
PTK2
KDR
MMP13
MMP3
CA3
PLK1
CA6
CDK1
MMP9
MMP2
PKN1
CA9
CSNK2A1
MET
NEK2
CXCR1
CAMK2B
ALK
AKT1
ABCB1
NEK6
PLA2G1B
CA5A
BACE1
AXL
NUAK1
AKR1C2
AKR1C3
AKR1C4
CA13
AKR1A1
GPR35
MAPT
KDM4E
TOP2A
INSR
MYLK
SYK
PIK3CG
APEX1
CDK5R1
CCNB3
CDK6
CDK2
ARG1
APP
TERT
TYR
HSD17B1
AHR
ESRRA
PTPRS
PLG
MPG
SLC22A12
PARP1
TTR
MMP12
CD38
AKR1B10
TNKS2
TOP1
CFTR
PFKFB3
AMY1A
GRK6
ADORA3
KIT
OPRM1
OPRD1
ST6GAL1
CSF1R
PLA2G2A
ODC1
NAE1
CBR1
SLC6A3
MAPK9
EWS-Fli1
PDE10A
TDP2
MAP2K1
IMPDH2
FBP1
CA5B
LYPLA1
LYPLA2
ACPP
CCNE2
ABCC9
CASP8
CASP1
MTOR
PNP
MMP1
MMP8
AURKA
JAK1
PKM
BRS3
EIF2AK3
PLEC
JAK3
TYK2
ADAM17
MMP14
MMP7
CREBBP
TRPM8
AOC3
GRK2
BDKRB1
NTRK1
PIK3CD
PRKDC
PIK3CB
XIAP
PLA2G7
CAPN1
FDFT1
TNK2
MAP3K5
CDC7
CDK9
CMA1
GABRB3
GABRA2
GABRG2
HSP90AA1
PIK3CA
SIRT1
PDE4B
PDE4D
ELANE
KCNJ6
SCN2A
HCRTR2
SCN10A
KCNJ5
P2RX3
CTSV
CTSL
ELOVL6
PPIA
CXCR2
GRM5
F10
P2RX7
KCNK3
KCNK9
VCP
CHRM1
CHRM3
HTR1A
DRD2
HTR7
HTR6
MAPK11
HCRTR1
ITGAV
TACR3
TRPA1
CFD
TGM2
TGM1
F13A1
PABPC1
CCND3
CPT1A
CCND1
IKBKB
CASP3
GRM4
PDE7A
CASP7
NOS1
TRPV1
PSEN2
CHRM4
PRKCG
PREP
PSMB5
SAE1
CTSB
CCKBR
GRM2
ERBB2
DBF4
GABBR1
HAO1
NR1H4
PTPN2
CDC25C
GPBAR1
PTPRF
ACP1
CDC25B
FABP1
UGT2B7
SCD
HSD17B3
PPARG
PRKCH
PTPN11
SIGMAR1
MDM2
TLR9
FABP2
THRA
THRB
SHH
LGALS3
LGALS9
SSTR2
SSTR4
SSTR1
SSTR3
VEGFA
FGF1
FGF2
HPSE
ADORA2B
SERPINE1
EIF4H
HRAS
SLC28A3
SLC29A1
FUCA1
GBA
HK2
HK1
HDAC1
SSTR5
ADK
METAP2
OGA
CHEK1
EPHA2
MAP3K9
FGFR1
BTK
MME
ATP12A
FABP5
MAPK3
PRKCD
KCNK2
HTR2A
HTR2C
PTGS1
MAOB
MGAM
ESRRB
PGK1
FLT1
GRM1
TACR1
FNTA
SLC5A7
NAAA
PDGFRA
PON1
UTS2R
MTNR1B
PRKCA
FPR2
CYP27A1
RPS6KB1
PDE4A
PDE4C
PGGT1B
PDE1B
LRRK2
MTNR1A
SIRT3
SIRT2
KDM1A
GPR139
CHRNA7
TGFBR1
CACNA2D1
ABAT
MIF
HDAC6
NFKB1
AGPAT2
TRAP1
HSP90B1
PDE8B
ALPL
MAPK8
MAPK10
CD81
PPARA
FFAR1
OXTR
CALCRL
RAF1
KCNH2
PDGFRB
PTAFR
FKBP1A
EPHX1
SMO
KIF11
LIMK2
PPID
ERN1
SGPL1
MERTK
ASAH1
SNCA
STS
IGFBP3
TNNC1
IGFBP6
IGFBP4
IGFBP5
IGFBP2
IGFBP1
CTSD
SRD5A1
SRD5A2
CCR5
NR1I2
HSD3B1
EPHX2
S1PR3
HSD17B7
MDM4
PTGDR2
PTGER4
ITGB1
PTGDR
AGTR1
ACE
RASGRP3
LTB4R
S1PR2
PTGFR
OPRK1
PLA2G4A
CTSA
EDNRA
ECE1
PTGER3
EDNRB
CYSLTR1
AMPD2
ITGB5
IDO1
CES1
SLC22A6
PTGIR
TACR2
EPAS1
NLRP3
PRSS1
CTRC
FKBP5
ITGA2B
FKBP4
TBXA2R
STAT5B
CASR
PLCG1
TYMS
SLC10A2
MAP3K20
TGFBR2
ACKR3
CCR1
PRKCB
ITGAL
MAPK13
PDE2A
SLC16A1
IL6ST
CCNT1
GRIN2A
GRIA2
PRKCE
PCSK7
CYP2D6
CYP2C9
CYP3A4
ITK
CDK8
LIPE
TKT
LNPEP
NTSR1
ITGB7
HPGDS
P2RY12
ITGA4
UBLCP1
SGK1
HSF1
TTL
IMPDH1
CYP26A1
CYP26B1
SLC6A1
F11
CTSG
ENPP2
DAGLA
BCL2L1
EZH2
PDE5A
REN
S1PR1
ROS1
CSNK1A1
CDK5
SCARB1
MAPK1
CACNA1H
TYRO3
SMYD2
PDE3A
ADA
CDK4
CCNE1
CDK7
PDPK1
MCHR1
PRKCQ
HCK
RPS6KA5
GLRA2
CCNC
CACNA1B
RIPK3
RIPK2
KCNA5
STAT3
AMPD1
AMPD3
HCAR2
HAO2
LDHA
LDHB
CCR9
DHODH
MALT1
SLC5A2
DRD1
F3
ADRA1D
DRD3
ADRA1A
ADRA1B
DRD5
ADRB2
ADRB3
CHRNB4
CHRNA3
KCNN1
KCNN2
KCNN3
MAPKAPK2
PRF1
MKNK1
TTK
XBP1
HTR2B
GRIA1
SLC47A1
TUBB1
CHRNA4
SLC1A3
SLC18A2
CSNK1G1
RPS6KA1
MARS
HDAC2
DYRK1A
CLK1
DYRK2
NTRK2
CALM1
CYP1A1
FYN
CHRND
MLNR
GALR1
GALR2
IL1B
PDYN
YARS
HDAC8
HDAC11
HDAC10
ANPEP
CBX7
NTSR2
BIRC3
NPY4R
TRHR
HLA-A
DPP4
HLA-DRB1
FURIN
CXCR4
PTK2B
NCOR2
HDAC3
MC4R
PDK1
PIN1
CAPN2
GHSR
CBX4
HDAC4
GHRL
BIRC2
CDA
TK1
PYGM
HSPA8
TYMP
HSPA5
GAPDH
AHCY
HPRT1
EIF4E
EHMT1
EHMT2
CDC42
RAC1
GAA
RNASE2
RNASE1
SETD7
POLA1
PLA2G5
PLA2G10
KLK1
KLK2
RXRA
HSD17B14
DYRK1B
YWHAG
PGF
WEE1
HNF4A
GUSB
DUSP3
DNMT1
PGD
ST3GAL3
FUT7
FUT4
STAT1
PIM2
PIM3
DNM1
MAP4K4
PRMT1
HSP90AB1
CCR4
EGLN1
DHFR
EP300
CYP1A2
PRKD1
SLC9A1
CETP
ALPG
PLAA
DPYD
RET
DCTPP1
CLK4
NOS3
KCNA3
TLR4
CXCL8
CCR2
ADRB1
RBBP9
BDKRB2
PDE1A
PDE3B
BAZ2B
BAZ2A
MPI
BRD9
PTPRCAP
PPP2CA
PPP1CC
CENPE
SLC6A9
HIF1A
GRIN2B
RARG
RARB
RXRG
NPY2R
ACACA
MGAT2
PDE6D
SLC6A15
HDAC5
HDAC7
HDAC9
ATP1A1
LGALS4
LGALS8
GRIK1
GRIK2
LIMK1
PTP4A3
ATM
FAP
FTO
KAT2B
TNFRSF1A
PDE9A
GSTP1
HTR1B
ICAM1
VCAM1
SELE
LPAR6
LPAR5
GPR119
LPAR3
LPAR2
LPAR1
LPAR4
PAM
IL6
GLUL
IKBKG
EEF2K
BMP1
NFE2L2
BRAF
CLK3
GLI2
GLI1
CHEK2
STAT6
CHRNB2
TNNI3
TNNT2
FNTB
GABRB2
CCNB1
CCNB2
GABRA3
GABRA6
KCNJ3
ITGB3
CCND2
APH1B
PSENEN
NCSTN
APH1A
PSEN1
UBA2
CCNA1
CCNA2
RAMP1
ITGB2
CCNH
CHRNA2
CDK3
CHUK
