# Supplementary material for: Modified Chaishao Liujunzi Decoction inhibits bile acid-induced gastric intestinal metaplasia: from network prediction to experimental verification
Source: Aging (Albany NY). 2023 Dec 10;15(23):13998–4018. doi: 10.18632/aging.205285 (PMC10756100; doi:10.18632/aging.205285)
Supplement: Supplementary Table 4 [file aging-15-205285-s004.xlsx]

## Sheet: TOP 20
Supplementary Table 4. The enrichment results of the top 20 GO-BP and KEFF pathways based on LogP.
GO-BP
GO	Category	CategoryID	Description	LogP	Enrichment	Z-score	#TotalGeneInLibrary	#GeneInGO	#GeneInHitList	#GeneInGOAndHitList	%InGO	STDV %InGO	GeneID	Hits	Log(q-value)	BestLogPInGroup	BestEnrichmentInGroup	STDV %InGO	GeneID	Hits	Log(q-value)	EvidenceCutoff	GROUP_ID	FirstInGroupByEnrichment	FirstInGroupByLogP	BestLogPInGroup	BestEnrichmentInGroup	URL
GO:0009725	GO Biological Processes	19	response to hormone	-55.0431	12.177	27.2462	30169	764	227	70	30.837	3.06521	142|185|207|249|367|383|595|596|836|890|1019|1394|1432|1508|1545|1636|1909|1910|2033|2099|2100|2185|2475|2645|2908|2932|3320|3417|3480|3488|3569|3716|3717|3718|3815|4311|4313|4323|4790|4842|4843|5159|5170|5241|5290|5295|5315|5319|5467|5468|5734|5743|5747|5781|5915|6198|6446|6548|6714|6772|6774|6777|6778|6869|7048|7124|7298|7494|23411|51738	PARP1|AGTR1|AKT1|ALPL|AR|ARG1|CCND1|BCL2|CASP3|CCNA2|CDK4|CRHR1|MAPK14|CTSB|CYP1B1|ACE|EDNRA|EDNRB|EP300|ESR1|ESR2|PTK2B|MTOR|GCK|NR3C1|GSK3B|HSP90AA1|IDH1|IGF1R|IGFBP5|IL6|JAK1|JAK2|JAK3|KIT|MME|MMP2|MMP14|NFKB1|NOS1|NOS2|PDGFRB|PDPK1|PGR|PIK3CA|PIK3R1|PKM|PLA2G1B|PPARD|PPARG|PTGER4|PTGS2|PTK2|PTPN11|RARB|RPS6KB1|SGK1|SLC9A1|SRC|STAT1|STAT3|STAT5B|STAT6|TACR1|TGFBR2|TNF|TYMS|XBP1|SIRT1|GHRL	-50.855	-55.0431	17.0954
GO:0030335	GO Biological Processes	19	positive regulation of cell migration	-53.1526	14.5583	28.3525	30169	566	227	62	27.3128	2.95732	25|207|472|596|623|949|1545|1956|2149|2152|2185|2246|2247|2260|2321|2475|3091|3265|3383|3480|3488|3553|3569|3576|3579|3685|3688|3717|3791|3815|4233|4313|4316|4318|4323|4638|5054|5156|5159|5170|5295|5594|5595|5743|5747|5879|5979|6198|6714|6774|6869|7015|7046|7048|7099|7124|7422|7494|7852|7941|23411|57007	ABL1|AKT1|ATM|BCL2|BDKRB1|SCARB1|CYP1B1|EGFR|F2R|F3|PTK2B|FGF1|FGF2|FGFR1|FLT1|MTOR|HIF1A|HRAS|ICAM1|IGF1R|IGFBP5|IL1B|IL6|CXCL8|CXCR2|ITGAV|ITGB1|JAK2|KDR|KIT|MET|MMP2|MMP7|MMP9|MMP14|MYLK|SERPINE1|PDGFRA|PDGFRB|PDPK1|PIK3R1|MAPK1|MAPK3|PTGS2|PTK2|RAC1|RET|RPS6KB1|SRC|STAT3|TACR1|TERT|TGFBR1|TGFBR2|TLR4|TNF|VEGFA|XBP1|CXCR4|PLA2G7|SIRT1|ACKR3	-49.2655	-53.1526	17.7678
GO:1901699	GO Biological Processes	19	cellular response to nitrogen compound	-52.1687	13.1669	27.2183	30169	646	227	64	28.1938	2.98638	25|142|185|196|207|383|598|836|890|1017|1019|1080|1131|1394|1545|1786|1909|1956|2146|2475|2645|2932|3066|3274|3356|3383|3480|3488|3716|3717|3718|4193|4313|4314|4363|4790|4988|5156|5170|5290|5295|5315|5319|5468|5594|5595|5743|5747|6198|6548|6714|6772|6774|6777|6778|7099|7124|7412|7494|7852|9971|10392|54106|64127	ABL1|PARP1|AGTR1|AHR|AKT1|ARG1|BCL2L1|CASP3|CCNA2|CDK2|CDK4|CFTR|CHRM3|CRHR1|CYP1B1|DNMT1|EDNRA|EGFR|EZH2|MTOR|GCK|GSK3B|HDAC2|HRH2|HTR2A|ICAM1|IGF1R|IGFBP5|JAK1|JAK2|JAK3|MDM2|MMP2|MMP3|ABCC1|NFKB1|OPRM1|PDGFRA|PDPK1|PIK3CA|PIK3R1|PKM|PLA2G1B|PPARG|MAPK1|MAPK3|PTGS2|PTK2|RPS6KB1|SLC9A1|SRC|STAT1|STAT3|STAT5B|STAT6|TLR4|TNF|VCAM1|XBP1|CXCR4|NR1H4|NOD1|TLR9|NOD2	-48.5337	-55.0431	17.0954
GO:0071417	GO Biological Processes	19	cellular response to organonitrogen compound	-52.1199	14.0136	27.7476	30169	588	227	62	27.3128	2.95732	25|142|185|196|207|383|598|836|890|1019|1080|1131|1394|1545|1786|1909|1956|2146|2475|2645|2932|3066|3274|3356|3383|3480|3488|3716|3717|3718|4193|4313|4363|4790|4988|5156|5170|5290|5295|5315|5319|5468|5594|5595|5743|5747|6198|6548|6714|6772|6774|6777|6778|7099|7124|7412|7494|7852|9971|10392|54106|64127	ABL1|PARP1|AGTR1|AHR|AKT1|ARG1|BCL2L1|CASP3|CCNA2|CDK4|CFTR|CHRM3|CRHR1|CYP1B1|DNMT1|EDNRA|EGFR|EZH2|MTOR|GCK|GSK3B|HDAC2|HRH2|HTR2A|ICAM1|IGF1R|IGFBP5|JAK1|JAK2|JAK3|MDM2|MMP2|ABCC1|NFKB1|OPRM1|PDGFRA|PDPK1|PIK3CA|PIK3R1|PKM|PLA2G1B|PPARG|MAPK1|MAPK3|PTGS2|PTK2|RPS6KB1|SLC9A1|SRC|STAT1|STAT3|STAT5B|STAT6|TLR4|TNF|VCAM1|XBP1|CXCR4|NR1H4|NOD1|TLR9|NOD2	-48.5337	-55.0431	17.0954
GO:2000147	GO Biological Processes	19	positive regulation of cell motility	-51.9367	13.9189	27.6411	30169	592	227	62	27.3128	2.95732	25|207|472|596|623|949|1545|1956|2149|2152|2185|2246|2247|2260|2321|2475|3091|3265|3383|3480|3488|3553|3569|3576|3579|3685|3688|3717|3791|3815|4233|4313|4316|4318|4323|4638|5054|5156|5159|5170|5295|5594|5595|5743|5747|5879|5979|6198|6714|6774|6869|7015|7046|7048|7099|7124|7422|7494|7852|7941|23411|57007	ABL1|AKT1|ATM|BCL2|BDKRB1|SCARB1|CYP1B1|EGFR|F2R|F3|PTK2B|FGF1|FGF2|FGFR1|FLT1|MTOR|HIF1A|HRAS|ICAM1|IGF1R|IGFBP5|IL1B|IL6|CXCL8|CXCR2|ITGAV|ITGB1|JAK2|KDR|KIT|MET|MMP2|MMP7|MMP9|MMP14|MYLK|SERPINE1|PDGFRA|PDGFRB|PDPK1|PIK3R1|MAPK1|MAPK3|PTGS2|PTK2|RAC1|RET|RPS6KB1|SRC|STAT3|TACR1|TERT|TGFBR1|TGFBR2|TLR4|TNF|VEGFA|XBP1|CXCR4|PLA2G7|SIRT1|ACKR3	-48.4475	-53.1526	17.7678
GO:0040017	GO Biological Processes	19	positive regulation of locomotion	-51.262	13.5749	27.2508	30169	607	227	62	27.3128	2.95732	25|207|472|596|623|949|1545|1956|2149|2152|2185|2246|2247|2260|2321|2475|3091|3265|3383|3480|3488|3553|3569|3576|3579|3685|3688|3717|3791|3815|4233|4313|4316|4318|4323|4638|5054|5156|5159|5170|5295|5594|5595|5743|5747|5879|5979|6198|6714|6774|6869|7015|7046|7048|7099|7124|7422|7494|7852|7941|23411|57007	ABL1|AKT1|ATM|BCL2|BDKRB1|SCARB1|CYP1B1|EGFR|F2R|F3|PTK2B|FGF1|FGF2|FGFR1|FLT1|MTOR|HIF1A|HRAS|ICAM1|IGF1R|IGFBP5|IL1B|IL6|CXCL8|CXCR2|ITGAV|ITGB1|JAK2|KDR|KIT|MET|MMP2|MMP7|MMP9|MMP14|MYLK|SERPINE1|PDGFRA|PDGFRB|PDPK1|PIK3R1|MAPK1|MAPK3|PTGS2|PTK2|RAC1|RET|RPS6KB1|SRC|STAT3|TACR1|TERT|TGFBR1|TGFBR2|TLR4|TNF|VEGFA|XBP1|CXCR4|PLA2G7|SIRT1|ACKR3	-47.8519	-53.1526	17.7678
GO:0001934	GO Biological Processes	19	positive regulation of protein phosphorylation	-50.5759	11.7111	25.8463	30169	749	227	66	29.0749	3.01402	25|134|207|595|596|673|891|894|1636|1910|1956|1991|2064|2146|2147|2185|2246|2247|2260|2321|2475|3066|3123|3265|3320|3356|3553|3558|3569|3572|3717|3791|3815|4282|4318|4842|5159|5170|5290|5319|5347|5468|5594|5595|5604|5743|5747|5781|5879|5979|6714|6850|7046|7048|7099|7124|7132|7422|8841|10892|11035|11200|23411|51738|54106|64127	ABL1|ADORA1|AKT1|CCND1|BCL2|BRAF|CCNB1|CCND2|ACE|EDNRB|EGFR|ELANE|ERBB2|EZH2|F2|PTK2B|FGF1|FGF2|FGFR1|FLT1|MTOR|HDAC2|HLA-DRB1|HRAS|HSP90AA1|HTR2A|IL1B|IL2|IL6|IL6ST|JAK2|KDR|KIT|MIF|MMP9|NOS1|PDGFRB|PDPK1|PIK3CA|PLA2G1B|PLK1|PPARG|MAPK1|MAPK3|MAP2K1|PTGS2|PTK2|PTPN11|RAC1|RET|SRC|SYK|TGFBR1|TGFBR2|TLR4|TNF|TNFRSF1A|VEGFA|HDAC3|MALT1|RIPK3|CHEK2|SIRT1|GHRL|TLR9|NOD2	-47.2328	-50.5759	26.1262
GO:0032496	GO Biological Processes	19	response to lipopolysaccharide	-47.1224	19.6893	29.4494	30169	324	227	48	21.1454	2.71024	25|207|249|383|623|834|836|841|949|1019|1234|1269|1432|1543|1636|1910|1991|2149|2950|3066|3248|3553|3569|3576|3717|4353|4790|4842|4843|4988|5054|5467|5594|5595|5599|5734|5743|6198|6714|7099|7124|7412|7494|9971|10892|54106|64127|114548	ABL1|AKT1|ALPL|ARG1|BDKRB1|CASP1|CASP3|CASP8|SCARB1|CDK4|CCR5|CNR2|MAPK14|CYP1A1|ACE|EDNRB|ELANE|F2R|GSTP1|HDAC2|HPGD|IL1B|IL6|CXCL8|JAK2|MPO|NFKB1|NOS1|NOS2|OPRM1|SERPINE1|PPARD|MAPK1|MAPK3|MAPK8|PTGER4|PTGS2|RPS6KB1|SRC|TLR4|TNF|VCAM1|XBP1|NR1H4|MALT1|TLR9|NOD2|NLRP3	-43.8373	-47.1224	19.6893
GO:0002237	GO Biological Processes	19	response to molecule of bacterial origin	-45.7651	18.4909	28.4501	30169	345	227	48	21.1454	2.71024	25|207|249|383|623|834|836|841|949|1019|1234|1269|1432|1543|1636|1910|1991|2149|2950|3066|3248|3553|3569|3576|3717|4353|4790|4842|4843|4988|5054|5467|5594|5595|5599|5734|5743|6198|6714|7099|7124|7412|7494|9971|10892|54106|64127|114548	ABL1|AKT1|ALPL|ARG1|BDKRB1|CASP1|CASP3|CASP8|SCARB1|CDK4|CCR5|CNR2|MAPK14|CYP1A1|ACE|EDNRB|ELANE|F2R|GSTP1|HDAC2|HPGD|IL1B|IL6|CXCL8|JAK2|MPO|NFKB1|NOS1|NOS2|OPRM1|SERPINE1|PPARD|MAPK1|MAPK3|MAPK8|PTGER4|PTGS2|RPS6KB1|SRC|TLR4|TNF|VCAM1|XBP1|NR1H4|MALT1|TLR9|NOD2|NLRP3	-42.5312	-47.1224	19.6893
GO:0071396	GO Biological Processes	19	cellular response to lipid	-45.6622	13.8441	25.925	30169	528	227	55	24.2291	2.84385	25|196|207|367|383|472|834|890|949|1019|1080|1234|1432|1545|1636|1910|1956|2099|2100|2185|2908|2932|2950|3066|3480|3553|3569|3576|3717|4313|4790|4843|5054|5241|5467|5594|5595|5599|5734|5979|6097|6198|6446|6714|6850|7099|7124|7421|7494|9971|10892|54106|64127|114548|151306	ABL1|AHR|AKT1|AR|ARG1|ATM|CASP1|CCNA2|SCARB1|CDK4|CFTR|CCR5|MAPK14|CYP1B1|ACE|EDNRB|EGFR|ESR1|ESR2|PTK2B|NR3C1|GSK3B|GSTP1|HDAC2|IGF1R|IL1B|IL6|CXCL8|JAK2|MMP2|NFKB1|NOS2|SERPINE1|PGR|PPARD|MAPK1|MAPK3|MAPK8|PTGER4|RET|RORC|RPS6KB1|SGK1|SRC|SYK|TLR4|TNF|VDR|XBP1|NR1H4|MALT1|TLR9|NOD2|NLRP3|GPBAR1	-42.474	-47.1224	19.6893
GO:0032103	GO Biological Processes	19	positive regulation of response to external stimulus	-44.7257	14.8943	26.262	30169	464	227	52	22.9075	2.78921	136|185|383|673|834|1636|2033|2147|2152|2185|2247|2260|3320|3480|3551|3553|3558|3569|3572|3576|3579|3717|3791|4233|4282|4363|4988|5054|5159|5320|5594|5595|5733|5734|5743|5747|5879|6714|6777|6850|7099|7124|7132|7422|7852|7941|9971|10392|51738|54106|64127|114548	ADORA2B|AGTR1|ARG1|BRAF|CASP1|ACE|EP300|F2|F3|PTK2B|FGF2|FGFR1|HSP90AA1|IGF1R|IKBKB|IL1B|IL2|IL6|IL6ST|CXCL8|CXCR2|JAK2|KDR|MET|MIF|ABCC1|OPRM1|SERPINE1|PDGFRB|PLA2G2A|MAPK1|MAPK3|PTGER3|PTGER4|PTGS2|PTK2|RAC1|SRC|STAT5B|SYK|TLR4|TNF|TNFRSF1A|VEGFA|CXCR4|PLA2G7|NR1H4|NOD1|GHRL|TLR9|NOD2|NLRP3	-41.5789	-44.7257	18.9862
GO:0031347	GO Biological Processes	19	regulation of defense response	-42.086	11.1404	23.2876	30169	680	227	57	25.1101	2.87821	134|136|142|185|240|330|331|383|472|834|841|1269|1432|1636|1910|1991|2033|2099|2950|3105|3123|3320|3551|3553|3558|3569|3572|3717|4314|4318|4363|4790|5054|5320|5467|5468|5595|5733|5734|5743|5781|6714|6772|6777|6850|7099|7124|7132|7941|8399|9971|10392|23476|51738|54106|64127|114548	ADORA1|ADORA2B|PARP1|AGTR1|ALOX5|BIRC3|XIAP|ARG1|ATM|CASP1|CASP8|CNR2|MAPK14|ACE|EDNRB|ELANE|EP300|ESR1|GSTP1|HLA-A|HLA-DRB1|HSP90AA1|IKBKB|IL1B|IL2|IL6|IL6ST|JAK2|MMP3|MMP9|ABCC1|NFKB1|SERPINE1|PLA2G2A|PPARD|PPARG|MAPK3|PTGER3|PTGER4|PTGS2|PTPN11|SRC|STAT1|STAT5B|SYK|TLR4|TNF|TNFRSF1A|PLA2G7|PLA2G10|NR1H4|NOD1|BRD4|GHRL|TLR9|NOD2|NLRP3	-38.977	-44.7257	18.9862
GO:0051347	GO Biological Processes	19	positive regulation of transferase activity	-41.9416	12.247	23.9393	30169	586	227	54	23.7885	2.82606	25|134|185|207|595|891|894|1636|1956|1991|2064|2146|2147|2185|2246|2247|2260|2321|2475|3123|3265|3320|3356|3480|3553|3558|3717|3791|3815|4233|4282|5156|5159|5170|5290|5319|5347|5594|5595|5604|5747|5979|6714|6850|7048|7099|7124|7422|10892|11035|23411|51738|54106|64127	ABL1|ADORA1|AGTR1|AKT1|CCND1|CCNB1|CCND2|ACE|EGFR|ELANE|ERBB2|EZH2|F2|PTK2B|FGF1|FGF2|FGFR1|FLT1|MTOR|HLA-DRB1|HRAS|HSP90AA1|HTR2A|IGF1R|IL1B|IL2|JAK2|KDR|KIT|MET|MIF|PDGFRA|PDGFRB|PDPK1|PIK3CA|PLA2G1B|PLK1|MAPK1|MAPK3|MAP2K1|PTK2|RET|SRC|SYK|TGFBR2|TLR4|TNF|VEGFA|MALT1|RIPK3|SIRT1|GHRL|TLR9|NOD2	-38.8673	-50.5759	26.1262
GO:1901652	GO Biological Processes	19	response to peptide	-41.3912	14.4396	25.0386	30169	451	227	49	21.5859	2.73067	142|185|207|249|383|890|1019|1394|1432|1545|1909|1910|2475|2645|2932|3383|3480|3488|3716|3717|3718|4193|4313|4314|4318|4363|4790|5170|5290|5295|5315|5319|5468|5743|5747|6198|6548|6714|6772|6774|6777|6778|7099|7124|7412|7494|10392|23411|64127	PARP1|AGTR1|AKT1|ALPL|ARG1|CCNA2|CDK4|CRHR1|MAPK14|CYP1B1|EDNRA|EDNRB|MTOR|GCK|GSK3B|ICAM1|IGF1R|IGFBP5|JAK1|JAK2|JAK3|MDM2|MMP2|MMP3|MMP9|ABCC1|NFKB1|PDPK1|PIK3CA|PIK3R1|PKM|PLA2G1B|PPARG|PTGS2|PTK2|RPS6KB1|SLC9A1|SRC|STAT1|STAT3|STAT5B|STAT6|TLR4|TNF|VCAM1|XBP1|NOD1|SIRT1|NOD2	-38.3491	-55.0431	17.0954
GO:0006468	GO Biological Processes	19	protein phosphorylation	-41.3526	10.8067	22.8745	30169	701	227	57	25.1101	2.87821	25|207|472|595|596|673|891|983|1017|1019|1147|1432|1612|1909|1956|2064|2185|2260|2321|2475|2932|3356|3480|3486|3551|3558|3716|3717|3718|3791|3815|4233|4638|5156|5159|5170|5295|5315|5347|5594|5595|5599|5604|5747|5979|6198|6446|6714|6790|6850|7046|7048|7099|11035|11200|54106|64127	ABL1|AKT1|ATM|CCND1|BCL2|BRAF|CCNB1|CDK1|CDK2|CDK4|CHUK|MAPK14|DAPK1|EDNRA|EGFR|ERBB2|PTK2B|FGFR1|FLT1|MTOR|GSK3B|HTR2A|IGF1R|IGFBP3|IKBKB|IL2|JAK1|JAK2|JAK3|KDR|KIT|MET|MYLK|PDGFRA|PDGFRB|PDPK1|PIK3R1|PKM|PLK1|MAPK1|MAPK3|MAPK8|MAP2K1|PTK2|RET|RPS6KB1|SGK1|SRC|AURKA|SYK|TGFBR1|TGFBR2|TLR4|RIPK3|CHEK2|TLR9|NOD2	-38.3405	-50.5759	26.1262
GO:0033674	GO Biological Processes	19	positive regulation of kinase activity	-40.7278	13.4517	24.2965	30169	494	227	50	22.0264	2.75063	25|134|207|595|891|894|1636|1956|1991|2064|2146|2147|2185|2246|2247|2260|2321|2475|3123|3265|3320|3356|3480|3553|3558|3717|3791|3815|4233|4282|5156|5159|5170|5290|5319|5604|5747|5979|6714|6850|7048|7099|7124|7422|10892|11035|23411|51738|54106|64127	ABL1|ADORA1|AKT1|CCND1|CCNB1|CCND2|ACE|EGFR|ELANE|ERBB2|EZH2|F2|PTK2B|FGF1|FGF2|FGFR1|FLT1|MTOR|HLA-DRB1|HRAS|HSP90AA1|HTR2A|IGF1R|IL1B|IL2|JAK2|KDR|KIT|MET|MIF|PDGFRA|PDGFRB|PDPK1|PIK3CA|PLA2G1B|MAP2K1|PTK2|RET|SRC|SYK|TGFBR2|TLR4|TNF|VEGFA|MALT1|RIPK3|SIRT1|GHRL|TLR9|NOD2	-37.7438	-50.5759	26.1262
GO:0043410	GO Biological Processes	19	positive regulation of MAPK cascade	-40.6405	13.3975	24.2404	30169	496	227	50	22.0264	2.75063	25|134|331|367|673|1956|1991|2064|2146|2149|2185|2246|2247|2260|2321|3123|3265|3356|3383|3480|3486|3487|3553|3569|3717|3791|3815|4282|4988|5156|5159|5319|5320|5595|5604|5781|5979|6714|6850|7046|7099|7124|7422|7498|10392|51738|54106|57007|64127|151306	ABL1|ADORA1|XIAP|AR|BRAF|EGFR|ELANE|ERBB2|EZH2|F2R|PTK2B|FGF1|FGF2|FGFR1|FLT1|HLA-DRB1|HRAS|HTR2A|ICAM1|IGF1R|IGFBP3|IGFBP4|IL1B|IL6|JAK2|KDR|KIT|MIF|OPRM1|PDGFRA|PDGFRB|PLA2G1B|PLA2G2A|MAPK3|MAP2K1|PTPN11|RET|SRC|SYK|TGFBR1|TLR4|TNF|VEGFA|XDH|NOD1|GHRL|TLR9|ACKR3|NOD2|GPBAR1	-37.7007	-50.5759	26.1262
GO:0009617	GO Biological Processes	19	response to bacterium	-40.6336	10.1694	22.262	30169	758	227	58	25.5507	2.8948	25|207|249|383|623|834|836|841|949|1019|1234|1269|1432|1543|1636|1910|1991|2147|2149|2950|3066|3105|3123|3248|3553|3569|3576|3717|3960|4353|4790|4842|4843|4988|5054|5319|5320|5467|5594|5595|5599|5734|5743|6198|6555|6714|6850|7099|7124|7132|7412|7494|9971|10392|10892|54106|64127|114548	ABL1|AKT1|ALPL|ARG1|BDKRB1|CASP1|CASP3|CASP8|SCARB1|CDK4|CCR5|CNR2|MAPK14|CYP1A1|ACE|EDNRB|ELANE|F2|F2R|GSTP1|HDAC2|HLA-A|HLA-DRB1|HPGD|IL1B|IL6|CXCL8|JAK2|LGALS4|MPO|NFKB1|NOS1|NOS2|OPRM1|SERPINE1|PLA2G1B|PLA2G2A|PPARD|MAPK1|MAPK3|MAPK8|PTGER4|PTGS2|RPS6KB1|SLC10A2|SRC|SYK|TLR4|TNF|TNFRSF1A|VCAM1|XBP1|NR1H4|NOD1|MALT1|TLR9|NOD2|NLRP3	-37.7007	-47.1224	19.6893
GO:0048732	GO Biological Processes	19	gland development	-40.3519	14.9436	24.9954	30169	418	227	47	20.7048	2.68934	25|207|367|383|472|595|596|673|887|1394|1543|1545|1909|1956|2099|2146|2247|2735|2908|3091|3172|3488|3569|3717|4233|4313|4790|5156|5241|5290|5594|5595|5604|6469|6714|6777|6778|6790|7046|7048|7124|7298|7421|7422|7494|7498|11035	ABL1|AKT1|AR|ARG1|ATM|CCND1|BCL2|BRAF|CCKBR|CRHR1|CYP1A1|CYP1B1|EDNRA|EGFR|ESR1|EZH2|FGF2|GLI1|NR3C1|HIF1A|HNF4A|IGFBP5|IL6|JAK2|MET|MMP2|NFKB1|PDGFRA|PGR|PIK3CA|MAPK1|MAPK3|MAP2K1|SHH|SRC|STAT5B|STAT6|AURKA|TGFBR1|TGFBR2|TNF|TYMS|VDR|VEGFA|XBP1|XDH|RIPK3	-37.4425	-40.3519	27.6881
GO:0071407	GO Biological Processes	19	cellular response to organic cyclic compound	-39.9559	12.9788	23.803	30169	512	227	50	22.0264	2.75063	25|196|249|367|383|836|841|890|983|1019|1080|1131|1543|1545|1636|1786|1956|2099|2100|2146|2908|2932|3066|3274|3356|3480|3488|3553|3717|4313|4790|4988|5241|5467|5594|5595|5743|6097|6198|6446|6548|6714|6772|7124|7421|9971|11200|54106|64127|151306	ABL1|AHR|ALPL|AR|ARG1|CASP3|CASP8|CCNA2|CDK1|CDK4|CFTR|CHRM3|CYP1A1|CYP1B1|ACE|DNMT1|EGFR|ESR1|ESR2|EZH2|NR3C1|GSK3B|HDAC2|HRH2|HTR2A|IGF1R|IGFBP5|IL1B|JAK2|MMP2|NFKB1|OPRM1|PGR|PPARD|MAPK1|MAPK3|PTGS2|RORC|RPS6KB1|SGK1|SLC9A1|SRC|STAT1|TNF|VDR|NR1H4|CHEK2|TLR9|NOD2|GPBAR1	-37.0688	-47.1224	19.6893
KEGG pathways
GO	Category	CategoryID	Description	LogP	Enrichment	Z-score	#TotalGeneInLibrary	#GeneInGO	#GeneInHitList	#GeneInGOAndHitList	%InGO	STDV %InGO	GeneID	Hits	Log(q-value)	BestLogPInGroup	BestEnrichmentInGroup
hsa05200	KEGG Pathway	24	Pathways in cancer	-95.6149	22.2757	43.0677	30169	531	227	89	39.207	3.24038	25|185|207|330|331|367|595|596|598|623|624|673|836|841|890|894|1017|1019|1147|1612|1909|1910|1956|2033|2034|2064|2099|2100|2147|2149|2246|2247|2260|2475|2735|2932|2950|3065|3066|3091|3265|3320|3480|3551|3558|3569|3572|3576|3685|3688|3716|3717|3718|3815|4193|4233|4313|4318|4790|4843|5156|5159|5290|5295|5467|5468|5594|5595|5599|5604|5733|5734|5743|5747|5879|5915|5979|6198|6469|6772|6774|6777|6778|7…	ABL1|AGTR1|AKT1|BIRC3|XIAP|AR|CCND1|BCL2|BCL2L1|BDKRB1|BDKRB2|BRAF|CASP3|CASP8|CCNA2|CCND2|CDK2|CDK4|CHUK|DAPK1|EDNRA|EDNRB|EGFR|EP300|EPAS1|ERBB2|ESR1|ESR2|F2|F2R|FGF1|FGF2|FGFR1|MTOR|GLI1|GSK3B|GSTP1|HDAC1|HDAC2|HIF1A|HRAS|HSP90AA1|IGF1R|IKBKB|IL2|IL6|IL6ST|CXCL8|ITGAV|ITGB1|JAK1|JAK2|JAK3|KIT|MDM2|MET|MMP2|MMP9|NFKB1|NOS2|PDGFRA|PDGFRB|PIK3CA|PIK3R1|PPARD|PPARG|MAPK1|MAPK3|MAPK8|MAP2K1|PTGER3|…	-93.0758	-95.6149	22.2757
hsa04151	KEGG Pathway	24	PI3K-Akt signaling pathway	-49.5211	19.1471	29.9045	30169	354	227	51	22.467	2.77015	207|595|596|598|894|1017|1019|1147|1956|2064|2149|2246|2247|2260|2321|2475|2932|3265|3320|3480|3551|3558|3569|3685|3688|3695|3716|3717|3718|3791|3815|4170|4193|4233|4790|5156|5159|5170|5290|5295|5594|5595|5604|5747|5879|6198|6446|6850|7099|7422|8517	AKT1|CCND1|BCL2|BCL2L1|CCND2|CDK2|CDK4|CHUK|EGFR|ERBB2|F2R|FGF1|FGF2|FGFR1|FLT1|MTOR|GSK3B|HRAS|HSP90AA1|IGF1R|IKBKB|IL2|IL6|ITGAV|ITGB1|ITGB7|JAK1|JAK2|JAK3|KDR|KIT|MCL1|MDM2|MET|NFKB1|PDGFRA|PDGFRB|PDPK1|PIK3CA|PIK3R1|MAPK1|MAPK3|MAP2K1|PTK2|RAC1|RPS6KB1|SGK1|SYK|TLR4|VEGFA|IKBKG	-47.2831	-49.5211	45.4226
hsa05205	KEGG Pathway	24	Proteoglycans in cancer	-42.5832	25.284	30.3769	30169	205	227	39	17.1806	2.50364	207|595|673|836|1432|1956|2064|2099|2247|2260|2475|3091|3265|3480|3685|3688|3791|4193|4233|4313|4318|5170|5290|5295|5594|5595|5604|5747|5781|5879|6198|6469|6548|6714|6774|7099|7124|7422|10855	AKT1|CCND1|BRAF|CASP3|MAPK14|EGFR|ERBB2|ESR1|FGF2|FGFR1|MTOR|HIF1A|HRAS|IGF1R|ITGAV|ITGB1|KDR|MDM2|MET|MMP2|MMP9|PDPK1|PIK3CA|PIK3R1|MAPK1|MAPK3|MAP2K1|PTK2|PTPN11|RAC1|RPS6KB1|SHH|SLC9A1|SRC|STAT3|TLR4|TNF|VEGFA|HPSE	-40.6462	-49.5211	45.4226
hsa01521	KEGG Pathway	24	EGFR tyrosine kinase inhibitor resistance	-37.1667	45.4226	34.4233	30169	79	227	27	11.8943	2.14861	207|596|598|673|1956|2064|2247|2475|2932|3265|3480|3569|3716|3717|3791|4233|5156|5159|5290|5295|5594|5595|5604|6198|6714|6774|7422	AKT1|BCL2|BCL2L1|BRAF|EGFR|ERBB2|FGF2|MTOR|GSK3B|HRAS|IGF1R|IL6|JAK1|JAK2|KDR|MET|PDGFRA|PDGFRB|PIK3CA|PIK3R1|MAPK1|MAPK3|MAP2K1|RPS6KB1|SRC|STAT3|VEGFA	-35.6691	-49.5211	45.4226
hsa04068	KEGG Pathway	24	FoxO signaling pathway	-33.6722	29.4213	28.3851	30169	131	227	29	12.7753	2.21561	207|472|595|673|891|894|1017|1147|1432|1956|2033|3265|3480|3551|3569|4193|5170|5290|5295|5347|5594|5595|5599|5604|6446|6774|7046|7048|23411	AKT1|ATM|CCND1|BRAF|CCNB1|CCND2|CDK2|CHUK|MAPK14|EGFR|EP300|HRAS|IGF1R|IKBKB|IL6|MDM2|PDPK1|PIK3CA|PIK3R1|PLK1|MAPK1|MAPK3|MAPK8|MAP2K1|SGK1|STAT3|TGFBR1|TGFBR2|SIRT1	-32.3092	-33.6722	29.4213
hsa04659	KEGG Pathway	24	Th17 cell differentiation	-32.9338	33.2258	29.2119	30169	108	227	27	11.8943	2.14861	196|1147|1432|2475|3091|3123|3320|3551|3553|3558|3569|3572|3716|3717|3718|4790|5594|5595|5599|6097|6772|6774|6777|6778|7046|7048|8517	AHR|CHUK|MAPK14|MTOR|HIF1A|HLA-DRB1|HSP90AA1|IKBKB|IL1B|IL2|IL6|IL6ST|JAK1|JAK2|JAK3|NFKB1|MAPK1|MAPK3|MAPK8|RORC|STAT1|STAT3|STAT5B|STAT6|TGFBR1|TGFBR2|IKBKG	-31.5989	-45.5441	45.4668
hsa04668	KEGG Pathway	24	TNF signaling pathway	-32.4582	32.0391	28.6544	30169	112	227	27	11.8943	2.14861	207|330|836|841|1147|1432|3383|3551|3553|3569|4314|4318|4323|4790|5290|5295|5594|5595|5599|5604|5743|7124|7132|7412|8517|11035|64127	AKT1|BIRC3|CASP3|CASP8|CHUK|MAPK14|ICAM1|IKBKB|IL1B|IL6|MMP3|MMP9|MMP14|NFKB1|PIK3CA|PIK3R1|MAPK1|MAPK3|MAPK8|MAP2K1|PTGS2|TNF|TNFRSF1A|VCAM1|IKBKG|RIPK3|NOD2	-31.1496	-45.5441	45.4668
hsa04210	KEGG Pathway	24	Apoptosis	-29.9671	26.3852	25.8343	30169	136	227	27	11.8943	2.14861	142|207|330|331|472|596|598|836|841|1147|1508|1509|3265|3551|4170|4790|5170|5290|5295|5551|5594|5595|5599|5604|7124|7132|8517	PARP1|AKT1|BIRC3|XIAP|ATM|BCL2|BCL2L1|CASP3|CASP8|CHUK|CTSB|CTSD|HRAS|IKBKB|MCL1|NFKB1|PDPK1|PIK3CA|PIK3R1|PRF1|MAPK1|MAPK3|MAPK8|MAP2K1|TNF|TNFRSF1A|IKBKG	-28.8594	-45.5441	45.4668
hsa04014	KEGG Pathway	24	Ras signaling pathway	-28.6278	17.5319	22.1524	30169	235	227	31	13.6564	2.27914	25|207|598|1147|1956|2246|2247|2260|2321|3265|3480|3551|3791|3815|4233|4790|5156|5159|5290|5295|5319|5320|5594|5595|5599|5604|5781|5879|7422|8399|8517	ABL1|AKT1|BCL2L1|CHUK|EGFR|FGF1|FGF2|FGFR1|FLT1|HRAS|IGF1R|IKBKB|KDR|KIT|MET|NFKB1|PDGFRA|PDGFRB|PIK3CA|PIK3R1|PLA2G1B|PLA2G2A|MAPK1|MAPK3|MAPK8|MAP2K1|PTPN11|RAC1|VEGFA|PLA2G10|IKBKG	-27.5938	-49.5211	45.4226
hsa04062	KEGG Pathway	24	Chemokine signaling pathway	-28.5383	20.0739	23.0856	30169	192	227	29	12.7753	2.21561	207|673|1147|1234|2185|2833|2932|3265|3551|3576|3577|3579|3717|3718|4790|5290|5295|5594|5595|5604|5747|5879|6714|6772|6774|6777|7852|8517|10803	AKT1|BRAF|CHUK|CCR5|PTK2B|CXCR3|GSK3B|HRAS|IKBKB|CXCL8|CXCR1|CXCR2|JAK2|JAK3|NFKB1|PIK3CA|PIK3R1|MAPK1|MAPK3|MAP2K1|PTK2|RAC1|SRC|STAT1|STAT3|STAT5B|CXCR4|IKBKG|CCR9	-27.5307	-45.5441	45.4668
hsa05235	KEGG Pathway	24	PD-L1 expression and PD-1 checkpoint pathway in cancer	-28.4558	34.3457	27.431	30169	89	227	23	10.1322	2.00281	207|1147|1432|1956|2475|3091|3265|3551|3716|3717|4790|5290|5295|5594|5595|5604|5781|6198|6772|6774|7099|8517|54106	AKT1|CHUK|MAPK14|EGFR|MTOR|HIF1A|HRAS|IKBKB|JAK1|JAK2|NFKB1|PIK3CA|PIK3R1|MAPK1|MAPK3|MAP2K1|PTPN11|RPS6KB1|STAT1|STAT3|TLR4|IKBKG|TLR9	-27.4608	-45.5441	45.4668
hsa04010	KEGG Pathway	24	MAPK signaling pathway	-26.8542	14.4656	20.2019	30169	294	227	32	14.0969	2.30969	207|673|836|1147|1432|1956|2064|2246|2247|2260|2321|3265|3480|3551|3553|3791|3815|4233|4790|5156|5159|5594|5595|5599|5604|5879|7046|7048|7124|7132|7422|8517	AKT1|BRAF|CASP3|CHUK|MAPK14|EGFR|ERBB2|FGF1|FGF2|FGFR1|FLT1|HRAS|IGF1R|IKBKB|IL1B|KDR|KIT|MET|NFKB1|PDGFRA|PDGFRB|MAPK1|MAPK3|MAPK8|MAP2K1|RAC1|TGFBR1|TGFBR2|TNF|TNFRSF1A|VEGFA|IKBKG	-25.9384	-49.5211	45.4226
hsa05208	KEGG Pathway	24	Chemical carcinogenesis - reactive oxygen species	-26.5986	17.2834	21.2507	30169	223	227	29	12.7753	2.21561	25|196|207|673|1147|1432|1543|1544|1545|1956|3091|3265|3551|4233|4790|5170|5290|5295|5594|5595|5599|5604|5747|5781|5879|6714|7422|8517|10327	ABL1|AHR|AKT1|BRAF|CHUK|MAPK14|CYP1A1|CYP1A2|CYP1B1|EGFR|HIF1A|HRAS|IKBKB|MET|NFKB1|PDPK1|PIK3CA|PIK3R1|MAPK1|MAPK3|MAPK8|MAP2K1|PTK2|PTPN11|RAC1|SRC|VEGFA|IKBKG|AKR1A1	-25.703	-49.5211	45.4226
hsa04621	KEGG Pathway	24	NOD-like receptor signaling pathway	-26.2264	19.5021	21.9191	30169	184	227	27	11.8943	2.14861	330|331|596|598|834|841|1147|1432|1508|3320|3551|3553|3569|3576|3716|4790|5594|5595|5599|6772|7099|7124|8517|10392|11035|64127|114548	BIRC3|XIAP|BCL2|BCL2L1|CASP1|CASP8|CHUK|MAPK14|CTSB|HSP90AA1|IKBKB|IL1B|IL6|CXCL8|JAK1|NFKB1|MAPK1|MAPK3|MAPK8|STAT1|TLR4|TNF|IKBKG|NOD1|RIPK3|NOD2|NLRP3	-25.3501	-45.5441	45.4668
hsa05226	KEGG Pathway	24	Gastric cancer	-25.8162	22.2992	22.6932	30169	149	227	25	11.0132	2.07782	207|595|596|673|1017|1956|2064|2246|2247|2475|2932|3265|4233|5243|5290|5295|5594|5595|5604|5915|6198|6469|7015|7046|7048	AKT1|CCND1|BCL2|BRAF|CDK2|EGFR|ERBB2|FGF1|FGF2|MTOR|GSK3B|HRAS|MET|ABCB1|PIK3CA|PIK3R1|MAPK1|MAPK3|MAP2K1|RARB|RPS6KB1|SHH|TERT|TGFBR1|TGFBR2	-24.9492	-49.5211	45.4226
hsa04630	KEGG Pathway	24	JAK-STAT signaling pathway	-24.866	20.5097	21.6792	30169	162	227	25	11.0132	2.07782	207|595|596|598|894|1956|2033|2475|3265|3558|3569|3572|3716|3717|3718|4170|5156|5159|5290|5295|5781|6772|6774|6777|6778	AKT1|CCND1|BCL2|BCL2L1|CCND2|EGFR|EP300|MTOR|HRAS|IL2|IL6|IL6ST|JAK1|JAK2|JAK3|MCL1|PDGFRA|PDGFRB|PIK3CA|PIK3R1|PTPN11|STAT1|STAT3|STAT5B|STAT6	-24.0345	-24.866	20.5097
hsa04066	KEGG Pathway	24	HIF-1 signaling pathway	-24.6329	26.8245	23.5178	30169	109	227	22	9.69163	1.96358	207|596|1956|2033|2064|2321|2475|3091|3480|3569|4790|4843|5054|5290|5295|5594|5595|5604|6198|6774|7099|7422	AKT1|BCL2|EGFR|EP300|ERBB2|FLT1|MTOR|HIF1A|IGF1R|IL6|NFKB1|NOS2|SERPINE1|PIK3CA|PIK3R1|MAPK1|MAPK3|MAP2K1|RPS6KB1|STAT3|TLR4|VEGFA	-23.8181	-49.5211	45.4226
hsa04620	KEGG Pathway	24	Toll-like receptor signaling pathway	-23.5334	26.8362	22.9806	30169	104	227	21	9.2511	1.92311	207|841|1147|1432|3551|3553|3569|3576|4790|5290|5295|5594|5595|5599|5604|5879|6772|7099|7124|8517|54106	AKT1|CASP8|CHUK|MAPK14|IKBKB|IL1B|IL6|CXCL8|NFKB1|PIK3CA|PIK3R1|MAPK1|MAPK3|MAPK8|MAP2K1|RAC1|STAT1|TLR4|TNF|IKBKG|TLR9	-22.7577	-45.5441	45.4668
hsa04015	KEGG Pathway	24	Rap1 signaling pathway	-23.2986	16.4547	19.5682	30169	210	227	26	11.4537	2.11371	136|207|673|1432|1956|2149|2246|2247|2260|2321|3265|3480|3688|3791|3815|4233|5156|5159|5290|5295|5594|5595|5604|5879|6714|7422	ADORA2B|AKT1|BRAF|MAPK14|EGFR|F2R|FGF1|FGF2|FGFR1|FLT1|HRAS|IGF1R|ITGB1|KDR|KIT|MET|PDGFRA|PDGFRB|PIK3CA|PIK3R1|MAPK1|MAPK3|MAP2K1|RAC1|SRC|VEGFA	-22.5304	-49.5211	45.4226
hsa04064	KEGG Pathway	24	NF-kappa B signaling pathway	-21.9756	25.5583	21.8439	30169	104	227	20	8.81057	1.88131	142|330|331|472|596|598|1147|3383|3551|3553|3576|4790|5743|6850|7099|7124|7132|7412|8517|10892	PARP1|BIRC3|XIAP|ATM|BCL2|BCL2L1|CHUK|ICAM1|IKBKB|IL1B|CXCL8|NFKB1|PTGS2|SYK|TLR4|TNF|TNFRSF1A|VCAM1|IKBKG|MALT1	-21.2427	-24.7508	30.3366

## Sheet: GO-BP
GO	Category	CategoryID	Description	LogP	Enrichment	Z-score	#TotalGeneInLibrary	#GeneInGO	#GeneInHitList	#GeneInGOAndHitList	%InGO	STDV %InGO	GeneID	Hits	Log(q-value)	BestLogPInGroup	BestEnrichmentInGroup
GO:0009725	GO Biological Processes	19	response to hormone	-55.0431	12.177	27.2462	30169	764	227	70	30.837	3.06521	142|185|207|249|367|383|595|596|836|890|1019|1394|1432|1508|1545|1636|1909|1910|2033|2099|2100|2185|2475|2645|2908|2932|3320|3417|3480|3488|3569|3716|3717|3718|3815|4311|4313|4323|4790|4842|4843|5159|5170|5241|5290|5295|5315|5319|5467|5468|5734|5743|5747|5781|5915|6198|6446|6548|6714|6772|6774|6777|6778|6869|7048|7124|7298|7494|23411|51738	PARP1|AGTR1|AKT1|ALPL|AR|ARG1|CCND1|BCL2|CASP3|CCNA2|CDK4|CRHR1|MAPK14|CTSB|CYP1B1|ACE|EDNRA|EDNRB|EP300|ESR1|ESR2|PTK2B|MTOR|GCK|NR3C1|GSK3B|HSP90AA1|IDH1|IGF1R|IGFBP5|IL6|JAK1|JAK2|JAK3|KIT|MME|MMP2|MMP14|NFKB1|NOS1|NOS2|PDGFRB|PDPK1|PGR|PIK3CA|PIK3R1|PKM|PLA2G1B|PPARD|PPARG|PTGER4|PTGS2|PTK2|PTPN11|RARB|RPS6KB1|SGK1|SLC9A1|SRC|STAT1|STAT3|STAT5B|STAT6|TACR1|TGFBR2|TNF|TYMS|XBP1|SIRT1|GHRL	-50.855	-55.0431	17.0954
GO:0030335	GO Biological Processes	19	positive regulation of cell migration	-53.1526	14.5583	28.3525	30169	566	227	62	27.3128	2.95732	25|207|472|596|623|949|1545|1956|2149|2152|2185|2246|2247|2260|2321|2475|3091|3265|3383|3480|3488|3553|3569|3576|3579|3685|3688|3717|3791|3815|4233|4313|4316|4318|4323|4638|5054|5156|5159|5170|5295|5594|5595|5743|5747|5879|5979|6198|6714|6774|6869|7015|7046|7048|7099|7124|7422|7494|7852|7941|23411|57007	ABL1|AKT1|ATM|BCL2|BDKRB1|SCARB1|CYP1B1|EGFR|F2R|F3|PTK2B|FGF1|FGF2|FGFR1|FLT1|MTOR|HIF1A|HRAS|ICAM1|IGF1R|IGFBP5|IL1B|IL6|CXCL8|CXCR2|ITGAV|ITGB1|JAK2|KDR|KIT|MET|MMP2|MMP7|MMP9|MMP14|MYLK|SERPINE1|PDGFRA|PDGFRB|PDPK1|PIK3R1|MAPK1|MAPK3|PTGS2|PTK2|RAC1|RET|RPS6KB1|SRC|STAT3|TACR1|TERT|TGFBR1|TGFBR2|TLR4|TNF|VEGFA|XBP1|CXCR4|PLA2G7|SIRT1|ACKR3	-49.2655	-53.1526	17.7678
GO:1901699	GO Biological Processes	19	cellular response to nitrogen compound	-52.1687	13.1669	27.2183	30169	646	227	64	28.1938	2.98638	25|142|185|196|207|383|598|836|890|1017|1019|1080|1131|1394|1545|1786|1909|1956|2146|2475|2645|2932|3066|3274|3356|3383|3480|3488|3716|3717|3718|4193|4313|4314|4363|4790|4988|5156|5170|5290|5295|5315|5319|5468|5594|5595|5743|5747|6198|6548|6714|6772|6774|6777|6778|7099|7124|7412|7494|7852|9971|10392|54106|64127	ABL1|PARP1|AGTR1|AHR|AKT1|ARG1|BCL2L1|CASP3|CCNA2|CDK2|CDK4|CFTR|CHRM3|CRHR1|CYP1B1|DNMT1|EDNRA|EGFR|EZH2|MTOR|GCK|GSK3B|HDAC2|HRH2|HTR2A|ICAM1|IGF1R|IGFBP5|JAK1|JAK2|JAK3|MDM2|MMP2|MMP3|ABCC1|NFKB1|OPRM1|PDGFRA|PDPK1|PIK3CA|PIK3R1|PKM|PLA2G1B|PPARG|MAPK1|MAPK3|PTGS2|PTK2|RPS6KB1|SLC9A1|SRC|STAT1|STAT3|STAT5B|STAT6|TLR4|TNF|VCAM1|XBP1|CXCR4|NR1H4|NOD1|TLR9|NOD2	-48.5337	-55.0431	17.0954
GO:0071417	GO Biological Processes	19	cellular response to organonitrogen compound	-52.1199	14.0136	27.7476	30169	588	227	62	27.3128	2.95732	25|142|185|196|207|383|598|836|890|1019|1080|1131|1394|1545|1786|1909|1956|2146|2475|2645|2932|3066|3274|3356|3383|3480|3488|3716|3717|3718|4193|4313|4363|4790|4988|5156|5170|5290|5295|5315|5319|5468|5594|5595|5743|5747|6198|6548|6714|6772|6774|6777|6778|7099|7124|7412|7494|7852|9971|10392|54106|64127	ABL1|PARP1|AGTR1|AHR|AKT1|ARG1|BCL2L1|CASP3|CCNA2|CDK4|CFTR|CHRM3|CRHR1|CYP1B1|DNMT1|EDNRA|EGFR|EZH2|MTOR|GCK|GSK3B|HDAC2|HRH2|HTR2A|ICAM1|IGF1R|IGFBP5|JAK1|JAK2|JAK3|MDM2|MMP2|ABCC1|NFKB1|OPRM1|PDGFRA|PDPK1|PIK3CA|PIK3R1|PKM|PLA2G1B|PPARG|MAPK1|MAPK3|PTGS2|PTK2|RPS6KB1|SLC9A1|SRC|STAT1|STAT3|STAT5B|STAT6|TLR4|TNF|VCAM1|XBP1|CXCR4|NR1H4|NOD1|TLR9|NOD2	-48.5337	-55.0431	17.0954
GO:2000147	GO Biological Processes	19	positive regulation of cell motility	-51.9367	13.9189	27.6411	30169	592	227	62	27.3128	2.95732	25|207|472|596|623|949|1545|1956|2149|2152|2185|2246|2247|2260|2321|2475|3091|3265|3383|3480|3488|3553|3569|3576|3579|3685|3688|3717|3791|3815|4233|4313|4316|4318|4323|4638|5054|5156|5159|5170|5295|5594|5595|5743|5747|5879|5979|6198|6714|6774|6869|7015|7046|7048|7099|7124|7422|7494|7852|7941|23411|57007	ABL1|AKT1|ATM|BCL2|BDKRB1|SCARB1|CYP1B1|EGFR|F2R|F3|PTK2B|FGF1|FGF2|FGFR1|FLT1|MTOR|HIF1A|HRAS|ICAM1|IGF1R|IGFBP5|IL1B|IL6|CXCL8|CXCR2|ITGAV|ITGB1|JAK2|KDR|KIT|MET|MMP2|MMP7|MMP9|MMP14|MYLK|SERPINE1|PDGFRA|PDGFRB|PDPK1|PIK3R1|MAPK1|MAPK3|PTGS2|PTK2|RAC1|RET|RPS6KB1|SRC|STAT3|TACR1|TERT|TGFBR1|TGFBR2|TLR4|TNF|VEGFA|XBP1|CXCR4|PLA2G7|SIRT1|ACKR3	-48.4475	-53.1526	17.7678
GO:0040017	GO Biological Processes	19	positive regulation of locomotion	-51.262	13.5749	27.2508	30169	607	227	62	27.3128	2.95732	25|207|472|596|623|949|1545|1956|2149|2152|2185|2246|2247|2260|2321|2475|3091|3265|3383|3480|3488|3553|3569|3576|3579|3685|3688|3717|3791|3815|4233|4313|4316|4318|4323|4638|5054|5156|5159|5170|5295|5594|5595|5743|5747|5879|5979|6198|6714|6774|6869|7015|7046|7048|7099|7124|7422|7494|7852|7941|23411|57007	ABL1|AKT1|ATM|BCL2|BDKRB1|SCARB1|CYP1B1|EGFR|F2R|F3|PTK2B|FGF1|FGF2|FGFR1|FLT1|MTOR|HIF1A|HRAS|ICAM1|IGF1R|IGFBP5|IL1B|IL6|CXCL8|CXCR2|ITGAV|ITGB1|JAK2|KDR|KIT|MET|MMP2|MMP7|MMP9|MMP14|MYLK|SERPINE1|PDGFRA|PDGFRB|PDPK1|PIK3R1|MAPK1|MAPK3|PTGS2|PTK2|RAC1|RET|RPS6KB1|SRC|STAT3|TACR1|TERT|TGFBR1|TGFBR2|TLR4|TNF|VEGFA|XBP1|CXCR4|PLA2G7|SIRT1|ACKR3	-47.8519	-53.1526	17.7678
GO:0001934	GO Biological Processes	19	positive regulation of protein phosphorylation	-50.5759	11.7111	25.8463	30169	749	227	66	29.0749	3.01402	25|134|207|595|596|673|891|894|1636|1910|1956|1991|2064|2146|2147|2185|2246|2247|2260|2321|2475|3066|3123|3265|3320|3356|3553|3558|3569|3572|3717|3791|3815|4282|4318|4842|5159|5170|5290|5319|5347|5468|5594|5595|5604|5743|5747|5781|5879|5979|6714|6850|7046|7048|7099|7124|7132|7422|8841|10892|11035|11200|23411|51738|54106|64127	ABL1|ADORA1|AKT1|CCND1|BCL2|BRAF|CCNB1|CCND2|ACE|EDNRB|EGFR|ELANE|ERBB2|EZH2|F2|PTK2B|FGF1|FGF2|FGFR1|FLT1|MTOR|HDAC2|HLA-DRB1|HRAS|HSP90AA1|HTR2A|IL1B|IL2|IL6|IL6ST|JAK2|KDR|KIT|MIF|MMP9|NOS1|PDGFRB|PDPK1|PIK3CA|PLA2G1B|PLK1|PPARG|MAPK1|MAPK3|MAP2K1|PTGS2|PTK2|PTPN11|RAC1|RET|SRC|SYK|TGFBR1|TGFBR2|TLR4|TNF|TNFRSF1A|VEGFA|HDAC3|MALT1|RIPK3|CHEK2|SIRT1|GHRL|TLR9|NOD2	-47.2328	-50.5759	26.1262
GO:0032496	GO Biological Processes	19	response to lipopolysaccharide	-47.1224	19.6893	29.4494	30169	324	227	48	21.1454	2.71024	25|207|249|383|623|834|836|841|949|1019|1234|1269|1432|1543|1636|1910|1991|2149|2950|3066|3248|3553|3569|3576|3717|4353|4790|4842|4843|4988|5054|5467|5594|5595|5599|5734|5743|6198|6714|7099|7124|7412|7494|9971|10892|54106|64127|114548	ABL1|AKT1|ALPL|ARG1|BDKRB1|CASP1|CASP3|CASP8|SCARB1|CDK4|CCR5|CNR2|MAPK14|CYP1A1|ACE|EDNRB|ELANE|F2R|GSTP1|HDAC2|HPGD|IL1B|IL6|CXCL8|JAK2|MPO|NFKB1|NOS1|NOS2|OPRM1|SERPINE1|PPARD|MAPK1|MAPK3|MAPK8|PTGER4|PTGS2|RPS6KB1|SRC|TLR4|TNF|VCAM1|XBP1|NR1H4|MALT1|TLR9|NOD2|NLRP3	-43.8373	-47.1224	19.6893
GO:0002237	GO Biological Processes	19	response to molecule of bacterial origin	-45.7651	18.4909	28.4501	30169	345	227	48	21.1454	2.71024	25|207|249|383|623|834|836|841|949|1019|1234|1269|1432|1543|1636|1910|1991|2149|2950|3066|3248|3553|3569|3576|3717|4353|4790|4842|4843|4988|5054|5467|5594|5595|5599|5734|5743|6198|6714|7099|7124|7412|7494|9971|10892|54106|64127|114548	ABL1|AKT1|ALPL|ARG1|BDKRB1|CASP1|CASP3|CASP8|SCARB1|CDK4|CCR5|CNR2|MAPK14|CYP1A1|ACE|EDNRB|ELANE|F2R|GSTP1|HDAC2|HPGD|IL1B|IL6|CXCL8|JAK2|MPO|NFKB1|NOS1|NOS2|OPRM1|SERPINE1|PPARD|MAPK1|MAPK3|MAPK8|PTGER4|PTGS2|RPS6KB1|SRC|TLR4|TNF|VCAM1|XBP1|NR1H4|MALT1|TLR9|NOD2|NLRP3	-42.5312	-47.1224	19.6893
GO:0071396	GO Biological Processes	19	cellular response to lipid	-45.6622	13.8441	25.925	30169	528	227	55	24.2291	2.84385	25|196|207|367|383|472|834|890|949|1019|1080|1234|1432|1545|1636|1910|1956|2099|2100|2185|2908|2932|2950|3066|3480|3553|3569|3576|3717|4313|4790|4843|5054|5241|5467|5594|5595|5599|5734|5979|6097|6198|6446|6714|6850|7099|7124|7421|7494|9971|10892|54106|64127|114548|151306	ABL1|AHR|AKT1|AR|ARG1|ATM|CASP1|CCNA2|SCARB1|CDK4|CFTR|CCR5|MAPK14|CYP1B1|ACE|EDNRB|EGFR|ESR1|ESR2|PTK2B|NR3C1|GSK3B|GSTP1|HDAC2|IGF1R|IL1B|IL6|CXCL8|JAK2|MMP2|NFKB1|NOS2|SERPINE1|PGR|PPARD|MAPK1|MAPK3|MAPK8|PTGER4|RET|RORC|RPS6KB1|SGK1|SRC|SYK|TLR4|TNF|VDR|XBP1|NR1H4|MALT1|TLR9|NOD2|NLRP3|GPBAR1	-42.474	-47.1224	19.6893
GO:0032103	GO Biological Processes	19	positive regulation of response to external stimulus	-44.7257	14.8943	26.262	30169	464	227	52	22.9075	2.78921	136|185|383|673|834|1636|2033|2147|2152|2185|2247|2260|3320|3480|3551|3553|3558|3569|3572|3576|3579|3717|3791|4233|4282|4363|4988|5054|5159|5320|5594|5595|5733|5734|5743|5747|5879|6714|6777|6850|7099|7124|7132|7422|7852|7941|9971|10392|51738|54106|64127|114548	ADORA2B|AGTR1|ARG1|BRAF|CASP1|ACE|EP300|F2|F3|PTK2B|FGF2|FGFR1|HSP90AA1|IGF1R|IKBKB|IL1B|IL2|IL6|IL6ST|CXCL8|CXCR2|JAK2|KDR|MET|MIF|ABCC1|OPRM1|SERPINE1|PDGFRB|PLA2G2A|MAPK1|MAPK3|PTGER3|PTGER4|PTGS2|PTK2|RAC1|SRC|STAT5B|SYK|TLR4|TNF|TNFRSF1A|VEGFA|CXCR4|PLA2G7|NR1H4|NOD1|GHRL|TLR9|NOD2|NLRP3	-41.5789	-44.7257	18.9862
GO:0031347	GO Biological Processes	19	regulation of defense response	-42.086	11.1404	23.2876	30169	680	227	57	25.1101	2.87821	134|136|142|185|240|330|331|383|472|834|841|1269|1432|1636|1910|1991|2033|2099|2950|3105|3123|3320|3551|3553|3558|3569|3572|3717|4314|4318|4363|4790|5054|5320|5467|5468|5595|5733|5734|5743|5781|6714|6772|6777|6850|7099|7124|7132|7941|8399|9971|10392|23476|51738|54106|64127|114548	ADORA1|ADORA2B|PARP1|AGTR1|ALOX5|BIRC3|XIAP|ARG1|ATM|CASP1|CASP8|CNR2|MAPK14|ACE|EDNRB|ELANE|EP300|ESR1|GSTP1|HLA-A|HLA-DRB1|HSP90AA1|IKBKB|IL1B|IL2|IL6|IL6ST|JAK2|MMP3|MMP9|ABCC1|NFKB1|SERPINE1|PLA2G2A|PPARD|PPARG|MAPK3|PTGER3|PTGER4|PTGS2|PTPN11|SRC|STAT1|STAT5B|SYK|TLR4|TNF|TNFRSF1A|PLA2G7|PLA2G10|NR1H4|NOD1|BRD4|GHRL|TLR9|NOD2|NLRP3	-38.977	-44.7257	18.9862
GO:0051347	GO Biological Processes	19	positive regulation of transferase activity	-41.9416	12.247	23.9393	30169	586	227	54	23.7885	2.82606	25|134|185|207|595|891|894|1636|1956|1991|2064|2146|2147|2185|2246|2247|2260|2321|2475|3123|3265|3320|3356|3480|3553|3558|3717|3791|3815|4233|4282|5156|5159|5170|5290|5319|5347|5594|5595|5604|5747|5979|6714|6850|7048|7099|7124|7422|10892|11035|23411|51738|54106|64127	ABL1|ADORA1|AGTR1|AKT1|CCND1|CCNB1|CCND2|ACE|EGFR|ELANE|ERBB2|EZH2|F2|PTK2B|FGF1|FGF2|FGFR1|FLT1|MTOR|HLA-DRB1|HRAS|HSP90AA1|HTR2A|IGF1R|IL1B|IL2|JAK2|KDR|KIT|MET|MIF|PDGFRA|PDGFRB|PDPK1|PIK3CA|PLA2G1B|PLK1|MAPK1|MAPK3|MAP2K1|PTK2|RET|SRC|SYK|TGFBR2|TLR4|TNF|VEGFA|MALT1|RIPK3|SIRT1|GHRL|TLR9|NOD2	-38.8673	-50.5759	26.1262
GO:1901652	GO Biological Processes	19	response to peptide	-41.3912	14.4396	25.0386	30169	451	227	49	21.5859	2.73067	142|185|207|249|383|890|1019|1394|1432|1545|1909|1910|2475|2645|2932|3383|3480|3488|3716|3717|3718|4193|4313|4314|4318|4363|4790|5170|5290|5295|5315|5319|5468|5743|5747|6198|6548|6714|6772|6774|6777|6778|7099|7124|7412|7494|10392|23411|64127	PARP1|AGTR1|AKT1|ALPL|ARG1|CCNA2|CDK4|CRHR1|MAPK14|CYP1B1|EDNRA|EDNRB|MTOR|GCK|GSK3B|ICAM1|IGF1R|IGFBP5|JAK1|JAK2|JAK3|MDM2|MMP2|MMP3|MMP9|ABCC1|NFKB1|PDPK1|PIK3CA|PIK3R1|PKM|PLA2G1B|PPARG|PTGS2|PTK2|RPS6KB1|SLC9A1|SRC|STAT1|STAT3|STAT5B|STAT6|TLR4|TNF|VCAM1|XBP1|NOD1|SIRT1|NOD2	-38.3491	-55.0431	17.0954
GO:0006468	GO Biological Processes	19	protein phosphorylation	-41.3526	10.8067	22.8745	30169	701	227	57	25.1101	2.87821	25|207|472|595|596|673|891|983|1017|1019|1147|1432|1612|1909|1956|2064|2185|2260|2321|2475|2932|3356|3480|3486|3551|3558|3716|3717|3718|3791|3815|4233|4638|5156|5159|5170|5295|5315|5347|5594|5595|5599|5604|5747|5979|6198|6446|6714|6790|6850|7046|7048|7099|11035|11200|54106|64127	ABL1|AKT1|ATM|CCND1|BCL2|BRAF|CCNB1|CDK1|CDK2|CDK4|CHUK|MAPK14|DAPK1|EDNRA|EGFR|ERBB2|PTK2B|FGFR1|FLT1|MTOR|GSK3B|HTR2A|IGF1R|IGFBP3|IKBKB|IL2|JAK1|JAK2|JAK3|KDR|KIT|MET|MYLK|PDGFRA|PDGFRB|PDPK1|PIK3R1|PKM|PLK1|MAPK1|MAPK3|MAPK8|MAP2K1|PTK2|RET|RPS6KB1|SGK1|SRC|AURKA|SYK|TGFBR1|TGFBR2|TLR4|RIPK3|CHEK2|TLR9|NOD2	-38.3405	-50.5759	26.1262
GO:0033674	GO Biological Processes	19	positive regulation of kinase activity	-40.7278	13.4517	24.2965	30169	494	227	50	22.0264	2.75063	25|134|207|595|891|894|1636|1956|1991|2064|2146|2147|2185|2246|2247|2260|2321|2475|3123|3265|3320|3356|3480|3553|3558|3717|3791|3815|4233|4282|5156|5159|5170|5290|5319|5604|5747|5979|6714|6850|7048|7099|7124|7422|10892|11035|23411|51738|54106|64127	ABL1|ADORA1|AKT1|CCND1|CCNB1|CCND2|ACE|EGFR|ELANE|ERBB2|EZH2|F2|PTK2B|FGF1|FGF2|FGFR1|FLT1|MTOR|HLA-DRB1|HRAS|HSP90AA1|HTR2A|IGF1R|IL1B|IL2|JAK2|KDR|KIT|MET|MIF|PDGFRA|PDGFRB|PDPK1|PIK3CA|PLA2G1B|MAP2K1|PTK2|RET|SRC|SYK|TGFBR2|TLR4|TNF|VEGFA|MALT1|RIPK3|SIRT1|GHRL|TLR9|NOD2	-37.7438	-50.5759	26.1262
GO:0043410	GO Biological Processes	19	positive regulation of MAPK cascade	-40.6405	13.3975	24.2404	30169	496	227	50	22.0264	2.75063	25|134|331|367|673|1956|1991|2064|2146|2149|2185|2246|2247|2260|2321|3123|3265|3356|3383|3480|3486|3487|3553|3569|3717|3791|3815|4282|4988|5156|5159|5319|5320|5595|5604|5781|5979|6714|6850|7046|7099|7124|7422|7498|10392|51738|54106|57007|64127|151306	ABL1|ADORA1|XIAP|AR|BRAF|EGFR|ELANE|ERBB2|EZH2|F2R|PTK2B|FGF1|FGF2|FGFR1|FLT1|HLA-DRB1|HRAS|HTR2A|ICAM1|IGF1R|IGFBP3|IGFBP4|IL1B|IL6|JAK2|KDR|KIT|MIF|OPRM1|PDGFRA|PDGFRB|PLA2G1B|PLA2G2A|MAPK3|MAP2K1|PTPN11|RET|SRC|SYK|TGFBR1|TLR4|TNF|VEGFA|XDH|NOD1|GHRL|TLR9|ACKR3|NOD2|GPBAR1	-37.7007	-50.5759	26.1262
GO:0009617	GO Biological Processes	19	response to bacterium	-40.6336	10.1694	22.262	30169	758	227	58	25.5507	2.8948	25|207|249|383|623|834|836|841|949|1019|1234|1269|1432|1543|1636|1910|1991|2147|2149|2950|3066|3105|3123|3248|3553|3569|3576|3717|3960|4353|4790|4842|4843|4988|5054|5319|5320|5467|5594|5595|5599|5734|5743|6198|6555|6714|6850|7099|7124|7132|7412|7494|9971|10392|10892|54106|64127|114548	ABL1|AKT1|ALPL|ARG1|BDKRB1|CASP1|CASP3|CASP8|SCARB1|CDK4|CCR5|CNR2|MAPK14|CYP1A1|ACE|EDNRB|ELANE|F2|F2R|GSTP1|HDAC2|HLA-A|HLA-DRB1|HPGD|IL1B|IL6|CXCL8|JAK2|LGALS4|MPO|NFKB1|NOS1|NOS2|OPRM1|SERPINE1|PLA2G1B|PLA2G2A|PPARD|MAPK1|MAPK3|MAPK8|PTGER4|PTGS2|RPS6KB1|SLC10A2|SRC|SYK|TLR4|TNF|TNFRSF1A|VCAM1|XBP1|NR1H4|NOD1|MALT1|TLR9|NOD2|NLRP3	-37.7007	-47.1224	19.6893
GO:0048732	GO Biological Processes	19	gland development	-40.3519	14.9436	24.9954	30169	418	227	47	20.7048	2.68934	25|207|367|383|472|595|596|673|887|1394|1543|1545|1909|1956|2099|2146|2247|2735|2908|3091|3172|3488|3569|3717|4233|4313|4790|5156|5241|5290|5594|5595|5604|6469|6714|6777|6778|6790|7046|7048|7124|7298|7421|7422|7494|7498|11035	ABL1|AKT1|AR|ARG1|ATM|CCND1|BCL2|BRAF|CCKBR|CRHR1|CYP1A1|CYP1B1|EDNRA|EGFR|ESR1|EZH2|FGF2|GLI1|NR3C1|HIF1A|HNF4A|IGFBP5|IL6|JAK2|MET|MMP2|NFKB1|PDGFRA|PGR|PIK3CA|MAPK1|MAPK3|MAP2K1|SHH|SRC|STAT5B|STAT6|AURKA|TGFBR1|TGFBR2|TNF|TYMS|VDR|VEGFA|XBP1|XDH|RIPK3	-37.4425	-40.3519	27.6881
GO:0071407	GO Biological Processes	19	cellular response to organic cyclic compound	-39.9559	12.9788	23.803	30169	512	227	50	22.0264	2.75063	25|196|249|367|383|836|841|890|983|1019|1080|1131|1543|1545|1636|1786|1956|2099|2100|2146|2908|2932|3066|3274|3356|3480|3488|3553|3717|4313|4790|4988|5241|5467|5594|5595|5743|6097|6198|6446|6548|6714|6772|7124|7421|9971|11200|54106|64127|151306	ABL1|AHR|ALPL|AR|ARG1|CASP3|CASP8|CCNA2|CDK1|CDK4|CFTR|CHRM3|CYP1A1|CYP1B1|ACE|DNMT1|EGFR|ESR1|ESR2|EZH2|NR3C1|GSK3B|HDAC2|HRH2|HTR2A|IGF1R|IGFBP5|IL1B|JAK2|MMP2|NFKB1|OPRM1|PGR|PPARD|MAPK1|MAPK3|PTGS2|RORC|RPS6KB1|SGK1|SLC9A1|SRC|STAT1|TNF|VDR|NR1H4|CHEK2|TLR9|NOD2|GPBAR1	-37.0688	-47.1224	19.6893
GO:0050727	GO Biological Processes	19	regulation of inflammatory response	-39.2295	14.767	24.5587	30169	414	227	46	20.2643	2.66796	134|136|185|240|330|331|472|834|1269|1432|1636|1910|1991|2099|2950|3123|3553|3558|3569|3572|3717|4314|4318|4363|4790|5054|5320|5467|5468|5733|5734|5743|6714|6777|6850|7099|7124|7132|7941|8399|9971|23476|51738|54106|64127|114548	ADORA1|ADORA2B|AGTR1|ALOX5|BIRC3|XIAP|ATM|CASP1|CNR2|MAPK14|ACE|EDNRB|ELANE|ESR1|GSTP1|HLA-DRB1|IL1B|IL2|IL6|IL6ST|JAK2|MMP3|MMP9|ABCC1|NFKB1|SERPINE1|PLA2G2A|PPARD|PPARG|PTGER3|PTGER4|PTGS2|SRC|STAT5B|SYK|TLR4|TNF|TNFRSF1A|PLA2G7|PLA2G10|NR1H4|BRD4|GHRL|TLR9|NOD2|NLRP3	-36.3636	-44.7257	18.9862
GO:0010035	GO Biological Processes	19	response to inorganic substance	-39.0928	12.4675	23.2577	30169	533	227	50	22.0264	2.75063	25|134|142|207|249|383|595|596|673|836|841|890|983|1017|1147|1543|1544|1545|1910|1956|2146|2168|2185|2539|3066|3091|3569|3791|3815|4313|4314|4318|4353|5159|5290|5594|5595|5599|5743|6469|6523|6714|6772|6778|6869|7015|7412|11035|23411|54106	ABL1|ADORA1|PARP1|AKT1|ALPL|ARG1|CCND1|BCL2|BRAF|CASP3|CASP8|CCNA2|CDK1|CDK2|CHUK|CYP1A1|CYP1A2|CYP1B1|EDNRB|EGFR|EZH2|FABP1|PTK2B|G6PD|HDAC2|HIF1A|IL6|KDR|KIT|MMP2|MMP3|MMP9|MPO|PDGFRB|PIK3CA|MAPK1|MAPK3|MAPK8|PTGS2|SHH|SLC5A1|SRC|STAT1|STAT6|TACR1|TERT|VCAM1|RIPK3|SIRT1|TLR9	-36.2471	-39.0928	24.7785
GO:0062197	GO Biological Processes	19	cellular response to chemical stress	-38.9708	19.5446	26.7506	30169	272	227	40	17.6211	2.52879	25|142|207|383|472|596|624|834|836|983|1147|1545|1612|1909|1956|2034|2146|2168|2475|2539|3066|3091|3569|3717|4313|4318|4353|4363|4638|5156|5290|5594|5595|5599|5743|6714|6778|11035|23411|114548	ABL1|PARP1|AKT1|ARG1|ATM|BCL2|BDKRB2|CASP1|CASP3|CDK1|CHUK|CYP1B1|DAPK1|EDNRA|EGFR|EPAS1|EZH2|FABP1|MTOR|G6PD|HDAC2|HIF1A|IL6|JAK2|MMP2|MMP9|MPO|ABCC1|MYLK|PDGFRA|PIK3CA|MAPK1|MAPK3|MAPK8|PTGS2|SRC|STAT6|RIPK3|SIRT1|NLRP3	-36.1444	-39.0928	24.7785
GO:0006954	GO Biological Processes	19	inflammatory response	-38.9327	12.3746	23.1573	30169	537	227	50	22.0264	2.75063	134|185|207|240|623|624|1147|1234|1269|1991|2147|2149|2152|2475|2833|3091|3123|3487|3551|3553|3569|3576|3579|3688|3717|3815|4282|4790|4843|4988|5320|5733|5734|5742|5743|5879|6774|6850|6869|7099|7124|7132|7412|7852|8399|8517|9971|10392|54106|114548	ADORA1|AGTR1|AKT1|ALOX5|BDKRB1|BDKRB2|CHUK|CCR5|CNR2|ELANE|F2|F2R|F3|MTOR|CXCR3|HIF1A|HLA-DRB1|IGFBP4|IKBKB|IL1B|IL6|CXCL8|CXCR2|ITGB1|JAK2|KIT|MIF|NFKB1|NOS2|OPRM1|PLA2G2A|PTGER3|PTGER4|PTGS1|PTGS2|RAC1|STAT3|SYK|TACR1|TLR4|TNF|TNFRSF1A|VCAM1|CXCR4|PLA2G10|IKBKG|NR1H4|NOD1|TLR9|NLRP3	-36.1248	-38.9327	12.3746
GO:0043549	GO Biological Processes	19	regulation of kinase activity	-38.6165	9.63801	21.366	30169	786	227	57	25.1101	2.87821	25|134|207|595|836|887|890|891|894|1636|1956|1991|2064|2146|2147|2185|2246|2247|2260|2321|2475|2950|3123|3265|3320|3356|3480|3553|3558|3717|3791|3815|4233|4282|5156|5159|5170|5290|5295|5319|5347|5468|5604|5747|5979|6714|6850|7048|7099|7124|7422|10892|11035|23411|51738|54106|64127	ABL1|ADORA1|AKT1|CCND1|CASP3|CCKBR|CCNA2|CCNB1|CCND2|ACE|EGFR|ELANE|ERBB2|EZH2|F2|PTK2B|FGF1|FGF2|FGFR1|FLT1|MTOR|GSTP1|HLA-DRB1|HRAS|HSP90AA1|HTR2A|IGF1R|IL1B|IL2|JAK2|KDR|KIT|MET|MIF|PDGFRA|PDGFRB|PDPK1|PIK3CA|PIK3R1|PLA2G1B|PLK1|PPARG|MAP2K1|PTK2|RET|SRC|SYK|TGFBR2|TLR4|TNF|VEGFA|MALT1|RIPK3|SIRT1|GHRL|TLR9|NOD2	-35.8263	-50.5759	26.1262
GO:0043408	GO Biological Processes	19	regulation of MAPK cascade	-38.0698	10.3412	21.677	30169	694	227	54	23.7885	2.82606	25|134|331|367|673|1956|1991|2064|2146|2149|2185|2246|2247|2260|2321|2950|3123|3265|3356|3383|3480|3486|3487|3553|3569|3717|3791|3815|4282|4988|5156|5159|5319|5320|5468|5594|5595|5604|5781|5979|6714|6850|7046|7099|7124|7422|7498|8841|10392|51738|54106|57007|64127|151306	ABL1|ADORA1|XIAP|AR|BRAF|EGFR|ELANE|ERBB2|EZH2|F2R|PTK2B|FGF1|FGF2|FGFR1|FLT1|GSTP1|HLA-DRB1|HRAS|HTR2A|ICAM1|IGF1R|IGFBP3|IGFBP4|IL1B|IL6|JAK2|KDR|KIT|MIF|OPRM1|PDGFRA|PDGFRB|PLA2G1B|PLA2G2A|PPARG|MAPK1|MAPK3|MAP2K1|PTPN11|RET|SRC|SYK|TGFBR1|TLR4|TNF|VEGFA|XDH|HDAC3|NOD1|GHRL|TLR9|ACKR3|NOD2|GPBAR1	-35.2966	-50.5759	26.1262
GO:0048534	GO Biological Processes	19	hematopoietic or lymphoid organ development	-37.9073	10.2672	21.5845	30169	699	227	54	23.7885	2.82606	25|142|472|596|673|836|841|1432|1636|2033|2034|2064|2146|2185|2321|2475|2539|3091|3123|3558|3569|3688|3717|3718|3791|3815|4318|5156|5295|5468|5594|5595|5604|5734|5781|5979|6097|6469|6714|6774|6777|6778|6850|7046|7048|7124|7153|7412|7422|8399|10803|10892|11035|23411	ABL1|PARP1|ATM|BCL2|BRAF|CASP3|CASP8|MAPK14|ACE|EP300|EPAS1|ERBB2|EZH2|PTK2B|FLT1|MTOR|G6PD|HIF1A|HLA-DRB1|IL2|IL6|ITGB1|JAK2|JAK3|KDR|KIT|MMP9|PDGFRA|PIK3R1|PPARG|MAPK1|MAPK3|MAP2K1|PTGER4|PTPN11|RET|RORC|SHH|SRC|STAT3|STAT5B|STAT6|SYK|TGFBR1|TGFBR2|TNF|TOP2A|VCAM1|VEGFA|PLA2G10|CCR9|MALT1|RIPK3|SIRT1	-35.1505	-37.9073	15.4538
GO:0035239	GO Biological Processes	19	tube morphogenesis	-37.6994	10.5132	21.6824	30169	670	227	53	23.348	2.80785	25|207|290|367|596|836|841|1432|1545|1636|1890|1909|1956|2034|2099|2185|2246|2247|2321|2735|2833|2908|3091|3248|3576|3579|3685|3688|3791|4233|4313|4323|4638|5054|5156|5159|5241|5290|5743|5747|5979|6469|6714|6850|7046|7048|7421|7422|7494|7852|10855|23411|57007	ABL1|AKT1|ANPEP|AR|BCL2|CASP3|CASP8|MAPK14|CYP1B1|ACE|TYMP|EDNRA|EGFR|EPAS1|ESR1|PTK2B|FGF1|FGF2|FLT1|GLI1|CXCR3|NR3C1|HIF1A|HPGD|CXCL8|CXCR2|ITGAV|ITGB1|KDR|MET|MMP2|MMP14|MYLK|SERPINE1|PDGFRA|PDGFRB|PGR|PIK3CA|PTGS2|PTK2|RET|SHH|SRC|SYK|TGFBR1|TGFBR2|VDR|VEGFA|XBP1|CXCR4|HPSE|SIRT1|ACKR3	-34.9583	-53.1526	17.7678
GO:0002520	GO Biological Processes	19	immune system development	-36.4401	9.62033	20.7585	30169	746	227	54	23.7885	2.82606	25|142|472|596|673|836|841|1432|1636|2033|2034|2064|2146|2185|2321|2475|2539|3091|3123|3558|3569|3688|3717|3718|3791|3815|4318|5156|5295|5468|5594|5595|5604|5734|5781|5979|6097|6469|6714|6774|6777|6778|6850|7046|7048|7124|7153|7412|7422|8399|10803|10892|11035|23411	ABL1|PARP1|ATM|BCL2|BRAF|CASP3|CASP8|MAPK14|ACE|EP300|EPAS1|ERBB2|EZH2|PTK2B|FLT1|MTOR|G6PD|HIF1A|HLA-DRB1|IL2|IL6|ITGB1|JAK2|JAK3|KDR|KIT|MMP9|PDGFRA|PIK3R1|PPARG|MAPK1|MAPK3|MAP2K1|PTGER4|PTPN11|RET|RORC|SHH|SRC|STAT3|STAT5B|STAT6|SYK|TGFBR1|TGFBR2|TNF|TOP2A|VCAM1|VEGFA|PLA2G10|CCR9|MALT1|RIPK3|SIRT1	-33.7143	-37.9073	15.4538
GO:0032870	GO Biological Processes	19	cellular response to hormone stimulus	-36.1215	12.6313	22.4609	30169	484	227	46	20.2643	2.66796	142|185|207|367|383|890|1019|1394|1508|1545|1636|1909|2099|2100|2645|2908|2932|3480|3716|3717|3718|3815|4790|5170|5241|5290|5295|5315|5319|5467|5468|5734|5747|5781|5915|6198|6446|6548|6714|6772|6774|6777|6778|7494|23411|51738	PARP1|AGTR1|AKT1|AR|ARG1|CCNA2|CDK4|CRHR1|CTSB|CYP1B1|ACE|EDNRA|ESR1|ESR2|GCK|NR3C1|GSK3B|IGF1R|JAK1|JAK2|JAK3|KIT|NFKB1|PDPK1|PGR|PIK3CA|PIK3R1|PKM|PLA2G1B|PPARD|PPARG|PTGER4|PTK2|PTPN11|RARB|RPS6KB1|SGK1|SLC9A1|SRC|STAT1|STAT3|STAT5B|STAT6|XBP1|SIRT1|GHRL	-33.4105	-55.0431	17.0954
GO:1901653	GO Biological Processes	19	cellular response to peptide	-35.3757	16.8286	24.3115	30169	308	227	39	17.1806	2.50364	142|185|207|383|890|1019|1394|1545|1909|2645|2932|3383|3480|3716|3717|3718|4193|4363|4790|5170|5290|5295|5315|5319|5468|5747|6198|6548|6714|6772|6774|6777|6778|7099|7124|7412|7494|10392|64127	PARP1|AGTR1|AKT1|ARG1|CCNA2|CDK4|CRHR1|CYP1B1|EDNRA|GCK|GSK3B|ICAM1|IGF1R|JAK1|JAK2|JAK3|MDM2|ABCC1|NFKB1|PDPK1|PIK3CA|PIK3R1|PKM|PLA2G1B|PPARG|PTK2|RPS6KB1|SLC9A1|SRC|STAT1|STAT3|STAT5B|STAT6|TLR4|TNF|VCAM1|XBP1|NOD1|NOD2	-32.6788	-55.0431	17.0954
GO:0007167	GO Biological Processes	19	enzyme-linked receptor protein signaling pathway	-35.3475	10.4484	20.969	30169	636	227	50	22.0264	2.75063	25|142|207|367|624|673|836|1432|1956|2064|2185|2246|2247|2260|2321|2932|3172|3248|3480|3488|3572|3716|3717|3718|3791|3815|4233|4313|4318|5156|5159|5170|5290|5295|5468|5594|5595|5747|5781|5879|5979|6714|6774|6777|6778|6850|7046|7048|7422|23411	ABL1|PARP1|AKT1|AR|BDKRB2|BRAF|CASP3|MAPK14|EGFR|ERBB2|PTK2B|FGF1|FGF2|FGFR1|FLT1|GSK3B|HNF4A|HPGD|IGF1R|IGFBP5|IL6ST|JAK1|JAK2|JAK3|KDR|KIT|MET|MMP2|MMP9|PDGFRA|PDGFRB|PDPK1|PIK3CA|PIK3R1|PPARG|MAPK1|MAPK3|PTK2|PTPN11|RAC1|RET|SRC|STAT3|STAT5B|STAT6|SYK|TGFBR1|TGFBR2|VEGFA|SIRT1	-32.6645	-50.5759	26.1262
GO:0006979	GO Biological Processes	19	response to oxidative stress	-35.0145	14.8881	23.2754	30169	366	227	41	18.0617	2.55335	25|142|207|383|596|836|983|1147|1545|1612|1909|1956|2034|2146|2168|2185|2539|2950|3066|3091|3417|3569|3717|4313|4318|4323|4353|4363|5156|5159|5594|5595|5599|5742|5743|6714|6772|6778|6869|11035|23411	ABL1|PARP1|AKT1|ARG1|BCL2|CASP3|CDK1|CHUK|CYP1B1|DAPK1|EDNRA|EGFR|EPAS1|EZH2|FABP1|PTK2B|G6PD|GSTP1|HDAC2|HIF1A|IDH1|IL6|JAK2|MMP2|MMP9|MMP14|MPO|ABCC1|PDGFRA|PDGFRB|MAPK1|MAPK3|MAPK8|PTGS1|PTGS2|SRC|STAT1|STAT6|TACR1|RIPK3|SIRT1	-32.3449	-39.0928	24.7785
GO:0001819	GO Biological Processes	19	positive regulation of cytokine production	-34.8114	12.3058	21.8783	30169	486	227	45	19.8238	2.64608	25|136|834|841|1147|1432|1545|1991|2149|2152|3066|3091|3105|3265|3320|3553|3558|3569|3572|3717|3815|4282|4843|5054|5295|5319|5734|5743|5781|6714|6772|6774|6777|6850|7099|7124|7494|9971|10392|10855|10892|23411|54106|64127|114548	ABL1|ADORA2B|CASP1|CASP8|CHUK|MAPK14|CYP1B1|ELANE|F2R|F3|HDAC2|HIF1A|HLA-A|HRAS|HSP90AA1|IL1B|IL2|IL6|IL6ST|JAK2|KIT|MIF|NOS2|SERPINE1|PIK3R1|PLA2G1B|PTGER4|PTGS2|PTPN11|SRC|STAT1|STAT3|STAT5B|SYK|TLR4|TNF|XBP1|NR1H4|NOD1|HPSE|MALT1|SIRT1|TLR9|NOD2|NLRP3	-32.1547	-44.7257	18.9862
GO:0045860	GO Biological Processes	19	positive regulation of protein kinase activity	-33.9058	13.3539	22.1456	30169	418	227	42	18.5022	2.57734	25|134|207|595|891|894|1636|1956|1991|2064|2146|2185|2246|2247|2260|2321|2475|3265|3320|3356|3553|3717|3815|4282|5159|5170|5290|5319|5604|5747|6714|6850|7048|7099|7124|7422|10892|11035|23411|51738|54106|64127	ABL1|ADORA1|AKT1|CCND1|CCNB1|CCND2|ACE|EGFR|ELANE|ERBB2|EZH2|PTK2B|FGF1|FGF2|FGFR1|FLT1|MTOR|HRAS|HSP90AA1|HTR2A|IL1B|JAK2|KIT|MIF|PDGFRB|PDPK1|PIK3CA|PLA2G1B|MAP2K1|PTK2|SRC|SYK|TGFBR2|TLR4|TNF|VEGFA|MALT1|RIPK3|SIRT1|GHRL|TLR9|NOD2	-31.2617	-50.5759	26.1262
GO:0071345	GO Biological Processes	19	cellular response to cytokine stimulus	-33.8084	9.38789	19.8631	30169	722	227	51	22.467	2.77015	207|330|383|834|1019|1147|1234|1432|1545|1612|2152|2185|2833|2932|3091|3383|3551|3553|3569|3572|3576|3577|3579|3716|3717|3718|3815|4311|4313|4790|4843|5594|5595|5781|6198|6714|6772|6774|6777|6778|6850|7099|7124|7132|7412|7494|7852|8399|10803|23411|57007	AKT1|BIRC3|ARG1|CASP1|CDK4|CHUK|CCR5|MAPK14|CYP1B1|DAPK1|F3|PTK2B|CXCR3|GSK3B|HIF1A|ICAM1|IKBKB|IL1B|IL6|IL6ST|CXCL8|CXCR1|CXCR2|JAK1|JAK2|JAK3|KIT|MME|MMP2|NFKB1|NOS2|MAPK1|MAPK3|PTPN11|RPS6KB1|SRC|STAT1|STAT3|STAT5B|STAT6|SYK|TLR4|TNF|TNFRSF1A|VCAM1|XBP1|CXCR4|PLA2G10|CCR9|SIRT1|ACKR3	-31.1765	-33.8084	18.6531
GO:0030097	GO Biological Processes	19	hemopoiesis	-33.7849	10.0343	20.2583	30169	649	227	49	21.5859	2.73067	25|142|472|596|673|836|841|1432|1636|2033|2034|2064|2146|2185|2321|2475|2539|3091|3123|3558|3569|3688|3717|3718|3791|3815|4318|5156|5295|5468|5734|5781|6097|6469|6714|6774|6777|6778|6850|7048|7124|7153|7412|7422|8399|10803|10892|11035|23411	ABL1|PARP1|ATM|BCL2|BRAF|CASP3|CASP8|MAPK14|ACE|EP300|EPAS1|ERBB2|EZH2|PTK2B|FLT1|MTOR|G6PD|HIF1A|HLA-DRB1|IL2|IL6|ITGB1|JAK2|JAK3|KDR|KIT|MMP9|PDGFRA|PIK3R1|PPARG|PTGER4|PTPN11|RORC|SHH|SRC|STAT3|STAT5B|STAT6|SYK|TGFBR2|TNF|TOP2A|VCAM1|VEGFA|PLA2G10|CCR9|MALT1|RIPK3|SIRT1	-31.1649	-37.9073	15.4538
GO:0007169	GO Biological Processes	19	transmembrane receptor protein tyrosine kinase signaling pathway	-32.5728	12.9739	21.5164	30169	420	227	41	18.0617	2.55335	25|207|367|624|673|836|1432|1956|2064|2185|2246|2247|2260|2321|2932|3480|3488|3716|3717|3718|3791|3815|4233|4313|4318|5156|5159|5170|5290|5295|5594|5747|5781|5879|5979|6714|6774|6777|6778|6850|7422	ABL1|AKT1|AR|BDKRB2|BRAF|CASP3|MAPK14|EGFR|ERBB2|PTK2B|FGF1|FGF2|FGFR1|FLT1|GSK3B|IGF1R|IGFBP5|JAK1|JAK2|JAK3|KDR|KIT|MET|MMP2|MMP9|PDGFRA|PDGFRB|PDPK1|PIK3CA|PIK3R1|MAPK1|PTK2|PTPN11|RAC1|RET|SRC|STAT3|STAT5B|STAT6|SYK|VEGFA	-29.9644	-50.5759	26.1262
GO:0000302	GO Biological Processes	19	response to reactive oxygen species	-31.6491	23.4535	25.5623	30169	170	227	30	13.2159	2.24779	25|207|383|596|836|983|1147|1545|1956|2146|2168|2185|2950|3066|3091|3569|4313|4318|4353|5156|5159|5594|5595|5599|6714|6772|6778|6869|11035|23411	ABL1|AKT1|ARG1|BCL2|CASP3|CDK1|CHUK|CYP1B1|EGFR|EZH2|FABP1|PTK2B|GSTP1|HDAC2|HIF1A|IL6|MMP2|MMP9|MPO|PDGFRA|PDGFRB|MAPK1|MAPK3|MAPK8|SRC|STAT1|STAT6|TACR1|RIPK3|SIRT1	-29.052	-39.0928	24.7785
GO:0009410	GO Biological Processes	19	response to xenobiotic stimulus	-31.4217	12.718	21.0057	30169	418	227	40	17.6211	2.52879	25|196|383|595|596|673|768|836|983|1019|1543|1544|1545|1557|1576|1636|2185|2950|3066|3172|3320|3356|3553|4313|4363|4842|4843|5243|5743|5979|6097|6198|6714|6772|7048|7124|7298|7852|8856|11200	ABL1|AHR|ARG1|CCND1|BCL2|BRAF|CA9|CASP3|CDK1|CDK4|CYP1A1|CYP1A2|CYP1B1|CYP2C19|CYP3A4|ACE|PTK2B|GSTP1|HDAC2|HNF4A|HSP90AA1|HTR2A|IL1B|MMP2|ABCC1|NOS1|NOS2|ABCB1|PTGS2|RET|RORC|RPS6KB1|SRC|STAT1|TGFBR2|TNF|TYMS|CXCR4|NR1I2|CHEK2	-28.8356	-31.4217	14.6419
GO:0001775	GO Biological Processes	19	cell activation	-31.2969	9.17892	18.9939	30169	695	227	48	21.1454	2.71024	25|136|472|596|673|841|1432|1803|2033|2064|2146|2147|2149|2185|2475|3105|3383|3553|3558|3569|3576|3579|3688|3717|3718|3815|5156|5290|5295|5551|5734|6097|6469|6714|6774|6777|6778|6850|7046|7048|7099|7124|7412|8399|10803|10892|11035|54106	ABL1|ADORA2B|ATM|BCL2|BRAF|CASP8|MAPK14|DPP4|EP300|ERBB2|EZH2|F2|F2R|PTK2B|MTOR|HLA-A|ICAM1|IL1B|IL2|IL6|CXCL8|CXCR2|ITGB1|JAK2|JAK3|KIT|PDGFRA|PIK3CA|PIK3R1|PRF1|PTGER4|RORC|SHH|SRC|STAT3|STAT5B|STAT6|SYK|TGFBR1|TGFBR2|TLR4|TNF|VCAM1|PLA2G10|CCR9|MALT1|RIPK3|TLR9	-28.7281	-37.9073	15.4538
GO:0043434	GO Biological Processes	19	response to peptide hormone	-31.293	13.9127	21.5509	30169	363	227	38	16.7401	2.4779	142|185|207|249|383|890|1019|1394|1432|1545|1909|1910|2475|2645|2932|3480|3488|3716|3717|3718|4790|5170|5290|5295|5315|5319|5468|5743|5747|6198|6548|6714|6772|6774|6777|6778|7494|23411	PARP1|AGTR1|AKT1|ALPL|ARG1|CCNA2|CDK4|CRHR1|MAPK14|CYP1B1|EDNRA|EDNRB|MTOR|GCK|GSK3B|IGF1R|IGFBP5|JAK1|JAK2|JAK3|NFKB1|PDPK1|PIK3CA|PIK3R1|PKM|PLA2G1B|PPARG|PTGS2|PTK2|RPS6KB1|SLC9A1|SRC|STAT1|STAT3|STAT5B|STAT6|XBP1|SIRT1	-28.7281	-55.0431	17.0954
GO:0001944	GO Biological Processes	19	vasculature development	-30.8872	10.8235	19.8283	30169	528	227	43	18.9427	2.60078	196|207|290|841|1432|1545|1636|1890|1909|2034|2185|2246|2247|2321|2833|3091|3248|3576|3685|3688|3791|3964|4193|4313|4323|4638|5054|5156|5159|5290|5594|5604|5743|5747|6469|6850|7046|7048|7422|7494|10855|23411|57007	AHR|AKT1|ANPEP|CASP8|MAPK14|CYP1B1|ACE|TYMP|EDNRA|EPAS1|PTK2B|FGF1|FGF2|FLT1|CXCR3|HIF1A|HPGD|CXCL8|ITGAV|ITGB1|KDR|LGALS8|MDM2|MMP2|MMP14|MYLK|SERPINE1|PDGFRA|PDGFRB|PIK3CA|MAPK1|MAP2K1|PTGS2|PTK2|SHH|SYK|TGFBR1|TGFBR2|VEGFA|XBP1|HPSE|SIRT1|ACKR3	-28.3325	-53.1526	17.7678
GO:0045859	GO Biological Processes	19	regulation of protein kinase activity	-30.866	9.2953	18.9354	30169	672	227	47	20.7048	2.68934	25|134|207|595|836|890|891|894|1636|1956|1991|2064|2146|2185|2246|2247|2260|2321|2475|2950|3265|3320|3356|3553|3717|3815|4282|5159|5170|5290|5319|5347|5468|5604|5747|6714|6850|7048|7099|7124|7422|10892|11035|23411|51738|54106|64127	ABL1|ADORA1|AKT1|CCND1|CASP3|CCNA2|CCNB1|CCND2|ACE|EGFR|ELANE|ERBB2|EZH2|PTK2B|FGF1|FGF2|FGFR1|FLT1|MTOR|GSTP1|HRAS|HSP90AA1|HTR2A|IL1B|JAK2|KIT|MIF|PDGFRB|PDPK1|PIK3CA|PLA2G1B|PLK1|PPARG|MAP2K1|PTK2|SRC|SYK|TGFBR2|TLR4|TNF|VEGFA|MALT1|RIPK3|SIRT1|GHRL|TLR9|NOD2	-28.3213	-50.5759	26.1262
GO:0001525	GO Biological Processes	19	angiogenesis	-30.5084	14.7216	21.6552	30169	325	227	36	15.859	2.42454	207|290|841|1432|1545|1636|1890|1909|2034|2185|2246|2247|2321|2833|3091|3576|3685|3688|3791|4313|4323|5054|5156|5159|5290|5743|5747|6469|6850|7046|7048|7422|7494|10855|23411|57007	AKT1|ANPEP|CASP8|MAPK14|CYP1B1|ACE|TYMP|EDNRA|EPAS1|PTK2B|FGF1|FGF2|FLT1|CXCR3|HIF1A|CXCL8|ITGAV|ITGB1|KDR|MMP2|MMP14|SERPINE1|PDGFRA|PDGFRB|PIK3CA|PTGS2|PTK2|SHH|SYK|TGFBR1|TGFBR2|VEGFA|XBP1|HPSE|SIRT1|ACKR3	-27.983	-53.1526	17.7678
GO:0070482	GO Biological Processes	19	response to oxygen levels	-30.5084	14.7216	21.6552	30169	325	227	36	15.859	2.42454	134|207|472|596|768|836|890|1543|1636|1803|1909|2033|2034|2168|2185|2475|3066|3091|4193|4313|4323|4842|4843|5159|5467|5468|5743|6548|6714|7015|7048|7124|7412|7422|7852|23411	ADORA1|AKT1|ATM|BCL2|CA9|CASP3|CCNA2|CYP1A1|ACE|DPP4|EDNRA|EP300|EPAS1|FABP1|PTK2B|MTOR|HDAC2|HIF1A|MDM2|MMP2|MMP14|NOS1|NOS2|PDGFRB|PPARD|PPARG|PTGS2|SLC9A1|SRC|TERT|TGFBR2|TNF|VCAM1|VEGFA|CXCR4|SIRT1	-27.983	-30.5084	15.443
GO:0001568	GO Biological Processes	19	blood vessel development	-30.4531	11.0097	19.7912	30169	507	227	42	18.5022	2.57734	196|207|290|841|1432|1545|1636|1890|1909|2034|2185|2246|2247|2321|2833|3091|3248|3576|3685|3688|3791|4193|4313|4323|4638|5054|5156|5159|5290|5594|5604|5743|5747|6469|6850|7046|7048|7422|7494|10855|23411|57007	AHR|AKT1|ANPEP|CASP8|MAPK14|CYP1B1|ACE|TYMP|EDNRA|EPAS1|PTK2B|FGF1|FGF2|FLT1|CXCR3|HIF1A|HPGD|CXCL8|ITGAV|ITGB1|KDR|MDM2|MMP2|MMP14|MYLK|SERPINE1|PDGFRA|PDGFRB|PIK3CA|MAPK1|MAP2K1|PTGS2|PTK2|SHH|SYK|TGFBR1|TGFBR2|VEGFA|XBP1|HPSE|SIRT1|ACKR3	-27.937	-53.1526	17.7678
GO:0040011	GO Biological Processes	19	locomotion	-29.6709	10.5319	19.2767	30169	530	227	42	18.5022	2.57734	185|240|1234|1269|1432|1803|1890|1909|1910|2033|2064|2247|2321|2833|3265|3553|3569|3576|3577|3579|3685|3815|4233|4282|4313|4363|5156|5159|5319|5594|5604|5747|5879|5979|6469|6850|7412|7422|7852|8399|10803|57007	AGTR1|ALOX5|CCR5|CNR2|MAPK14|DPP4|TYMP|EDNRA|EDNRB|EP300|ERBB2|FGF2|FLT1|CXCR3|HRAS|IL1B|IL6|CXCL8|CXCR1|CXCR2|ITGAV|KIT|MET|MIF|MMP2|ABCC1|PDGFRA|PDGFRB|PLA2G1B|MAPK1|MAP2K1|PTK2|RAC1|RET|SHH|SYK|VCAM1|VEGFA|CXCR4|PLA2G10|CCR9|ACKR3	-27.164	-29.6709	15.1889
GO:0071216	GO Biological Processes	19	cellular response to biotic stimulus	-29.4704	17.4299	22.4367	30169	244	227	32	14.0969	2.30969	25|207|383|834|949|1019|1234|1432|1910|2932|2950|3553|3569|3576|3717|4790|4843|5054|5467|5594|5595|5599|6714|6850|7099|7124|7494|9971|10892|54106|64127|114548	ABL1|AKT1|ARG1|CASP1|SCARB1|CDK4|CCR5|MAPK14|EDNRB|GSK3B|GSTP1|IL1B|IL6|CXCL8|JAK2|NFKB1|NOS2|SERPINE1|PPARD|MAPK1|MAPK3|MAPK8|SRC|SYK|TLR4|TNF|XBP1|NR1H4|MALT1|TLR9|NOD2|NLRP3	-26.9725	-47.1224	19.6893
GO:0034599	GO Biological Processes	19	cellular response to oxidative stress	-29.4134	18.5585	22.863	30169	222	227	31	13.6564	2.27914	25|142|207|383|596|983|1147|1545|1612|1909|1956|2034|2146|2168|2539|3066|3091|3569|3717|4313|4318|4353|4363|5156|5594|5595|5599|6714|6778|11035|23411	ABL1|PARP1|AKT1|ARG1|BCL2|CDK1|CHUK|CYP1B1|DAPK1|EDNRA|EGFR|EPAS1|EZH2|FABP1|G6PD|HDAC2|HIF1A|IL6|JAK2|MMP2|MMP9|MPO|ABCC1|PDGFRA|MAPK1|MAPK3|MAPK8|SRC|STAT6|RIPK3|SIRT1	-26.9242	-39.0928	24.7785
GO:0036293	GO Biological Processes	19	response to decreased oxygen levels	-29.2874	15.2145	21.435	30169	297	227	34	14.978	2.36853	134|207|472|596|768|836|890|1543|1636|1803|1909|2033|2034|2168|2185|2475|3091|4193|4313|4323|4842|4843|5467|5468|5743|6548|6714|7015|7048|7124|7412|7422|7852|23411	ADORA1|AKT1|ATM|BCL2|CA9|CASP3|CCNA2|CYP1A1|ACE|DPP4|EDNRA|EP300|EPAS1|FABP1|PTK2B|MTOR|HIF1A|MDM2|MMP2|MMP14|NOS1|NOS2|PPARD|PPARG|PTGS2|SLC9A1|SRC|TERT|TGFBR2|TNF|VCAM1|VEGFA|CXCR4|SIRT1	-26.8068	-30.5084	15.443
GO:0010942	GO Biological Processes	19	positive regulation of cell death	-29.2779	9.524	18.5805	30169	614	227	44	19.3833	2.62369	25|134|142|472|836|841|1509|1545|1612|1636|2908|2932|3248|3486|3569|3579|3688|3717|4170|4313|4314|4318|4843|5159|5319|5468|5551|5599|5743|5915|5979|6548|6714|6850|7046|7099|7124|7132|7153|7421|10392|11035|11200|23411	ABL1|ADORA1|PARP1|ATM|CASP3|CASP8|CTSD|CYP1B1|DAPK1|ACE|NR3C1|GSK3B|HPGD|IGFBP3|IL6|CXCR2|ITGB1|JAK2|MCL1|MMP2|MMP3|MMP9|NOS2|PDGFRB|PLA2G1B|PPARG|PRF1|MAPK8|PTGS2|RARB|RET|SLC9A1|SRC|SYK|TGFBR1|TLR4|TNF|TNFRSF1A|TOP2A|VDR|NOD1|RIPK3|CHEK2|SIRT1	-26.8057	-29.2779	9.524
GO:0009611	GO Biological Processes	19	response to wounding	-29.2377	11.7003	19.7549	30169	443	227	39	17.1806	2.50364	383|596|836|949|983|1432|1543|1909|2064|2147|2149|2152|2162|2246|2247|2735|3091|3172|3569|3688|3717|3791|4313|4988|5156|5159|5290|5467|5879|6198|6469|6714|6790|6850|7046|7048|7099|7422|10855	ARG1|BCL2|CASP3|SCARB1|CDK1|MAPK14|CYP1A1|EDNRA|ERBB2|F2|F2R|F3|F13A1|FGF1|FGF2|GLI1|HIF1A|HNF4A|IL6|ITGB1|JAK2|KDR|MMP2|OPRM1|PDGFRA|PDGFRB|PIK3CA|PPARD|RAC1|RPS6KB1|SHH|SRC|AURKA|SYK|TGFBR1|TGFBR2|TLR4|VEGFA|HPSE	-26.7738	-29.2377	11.7003
GO:0006935	GO Biological Processes	19	chemotaxis	-29.1958	10.6844	19.2054	30169	510	227	41	18.0617	2.55335	185|240|1234|1269|1432|1803|1890|1909|1910|2064|2247|2321|2833|3265|3553|3569|3576|3577|3579|3685|3815|4233|4282|4313|4363|5156|5159|5319|5594|5604|5747|5879|5979|6469|6850|7412|7422|7852|8399|10803|57007	AGTR1|ALOX5|CCR5|CNR2|MAPK14|DPP4|TYMP|EDNRA|EDNRB|ERBB2|FGF2|FLT1|CXCR3|HRAS|IL1B|IL6|CXCL8|CXCR1|CXCR2|ITGAV|KIT|MET|MIF|MMP2|ABCC1|PDGFRA|PDGFRB|PLA2G1B|MAPK1|MAP2K1|PTK2|RAC1|RET|SHH|SYK|VCAM1|VEGFA|CXCR4|PLA2G10|CCR9|ACKR3	-26.74	-29.6709	15.1889
GO:0042330	GO Biological Processes	19	taxis	-29.1286	10.6426	19.1608	30169	512	227	41	18.0617	2.55335	185|240|1234|1269|1432|1803|1890|1909|1910|2064|2247|2321|2833|3265|3553|3569|3576|3577|3579|3685|3815|4233|4282|4313|4363|5156|5159|5319|5594|5604|5747|5879|5979|6469|6850|7412|7422|7852|8399|10803|57007	AGTR1|ALOX5|CCR5|CNR2|MAPK14|DPP4|TYMP|EDNRA|EDNRB|ERBB2|FGF2|FLT1|CXCR3|HRAS|IL1B|IL6|CXCL8|CXCR1|CXCR2|ITGAV|KIT|MET|MIF|MMP2|ABCC1|PDGFRA|PDGFRB|PLA2G1B|MAPK1|MAP2K1|PTK2|RAC1|RET|SHH|SYK|VCAM1|VEGFA|CXCR4|PLA2G10|CCR9|ACKR3	-26.6808	-29.6709	15.1889
GO:0071222	GO Biological Processes	19	cellular response to lipopolysaccharide	-29.0942	19.4492	23.0782	30169	205	227	30	13.2159	2.24779	25|207|383|834|949|1019|1234|1432|1910|2950|3553|3569|3576|3717|4790|4843|5054|5467|5594|5595|5599|6714|7099|7124|7494|9971|10892|54106|64127|114548	ABL1|AKT1|ARG1|CASP1|SCARB1|CDK4|CCR5|MAPK14|EDNRB|GSTP1|IL1B|IL6|CXCL8|JAK2|NFKB1|NOS2|SERPINE1|PPARD|MAPK1|MAPK3|MAPK8|SRC|TLR4|TNF|XBP1|NR1H4|MALT1|TLR9|NOD2|NLRP3	-26.6543	-47.1224	19.6893
GO:0008283	GO Biological Processes	19	cell population proliferation	-29.0634	8.75866	18.0577	30169	698	227	46	20.2643	2.66796	25|207|367|595|596|598|949|983|1543|1636|1909|1956|2064|2099|2185|2246|2247|2950|3091|3265|3486|3487|3488|3558|3569|3688|3791|3815|4323|4953|5159|5243|5467|5594|5604|5915|6469|6714|6772|6774|6777|6778|7046|7099|7124|10892	ABL1|AKT1|AR|CCND1|BCL2|BCL2L1|SCARB1|CDK1|CYP1A1|ACE|EDNRA|EGFR|ERBB2|ESR1|PTK2B|FGF1|FGF2|GSTP1|HIF1A|HRAS|IGFBP3|IGFBP4|IGFBP5|IL2|IL6|ITGB1|KDR|KIT|MMP14|ODC1|PDGFRB|ABCB1|PPARD|MAPK1|MAP2K1|RARB|SHH|SRC|STAT1|STAT3|STAT5B|STAT6|TGFBR1|TLR4|TNF|MALT1	-26.6311	-29.0634	17.8285
GO:0070848	GO Biological Processes	19	response to growth factor	-28.8955	10.4991	19.0064	30169	519	227	41	18.0617	2.55335	25|142|207|383|836|890|1432|1956|2064|2246|2247|2260|2321|2908|3065|3066|3248|3480|3576|3791|4842|4988|5156|5159|5170|5290|5468|5594|5595|5747|5781|6198|6714|6774|6777|7046|7048|7099|7412|7422|23411	ABL1|PARP1|AKT1|ARG1|CASP3|CCNA2|MAPK14|EGFR|ERBB2|FGF1|FGF2|FGFR1|FLT1|NR3C1|HDAC1|HDAC2|HPGD|IGF1R|CXCL8|KDR|NOS1|OPRM1|PDGFRA|PDGFRB|PDPK1|PIK3CA|PPARG|MAPK1|MAPK3|PTK2|PTPN11|RPS6KB1|SRC|STAT3|STAT5B|TGFBR1|TGFBR2|TLR4|VCAM1|VEGFA|SIRT1	-26.4708	-50.5759	26.1262
GO:0048514	GO Biological Processes	19	blood vessel morphogenesis	-28.8788	11.996	19.783	30169	421	227	38	16.7401	2.4779	207|290|841|1432|1545|1636|1890|1909|2034|2185|2246|2247|2321|2833|3091|3248|3576|3685|3688|3791|4313|4323|4638|5054|5156|5159|5290|5743|5747|6469|6850|7046|7048|7422|7494|10855|23411|57007	AKT1|ANPEP|CASP8|MAPK14|CYP1B1|ACE|TYMP|EDNRA|EPAS1|PTK2B|FGF1|FGF2|FLT1|CXCR3|HIF1A|HPGD|CXCL8|ITGAV|ITGB1|KDR|MMP2|MMP14|MYLK|SERPINE1|PDGFRA|PDGFRB|PIK3CA|PTGS2|PTK2|SHH|SYK|TGFBR1|TGFBR2|VEGFA|XBP1|HPSE|SIRT1|ACKR3	-26.4615	-53.1526	17.7678
GO:0002521	GO Biological Processes	19	leukocyte differentiation	-28.7327	12.4807	19.9728	30169	394	227	37	16.2996	2.45154	25|142|472|596|673|841|1432|2033|2064|2146|2185|2475|3123|3558|3569|3688|3718|3815|4318|5295|5468|5734|6097|6469|6714|6774|6777|6778|6850|7048|7124|7412|7422|10803|10892|11035|23411	ABL1|PARP1|ATM|BCL2|BRAF|CASP8|MAPK14|EP300|ERBB2|EZH2|PTK2B|MTOR|HLA-DRB1|IL2|IL6|ITGB1|JAK3|KIT|MMP9|PIK3R1|PPARG|PTGER4|RORC|SHH|SRC|STAT3|STAT5B|STAT6|SYK|TGFBR2|TNF|VCAM1|VEGFA|CCR9|MALT1|RIPK3|SIRT1	-26.3226	-37.9073	15.4538
GO:0009612	GO Biological Processes	19	response to mechanical stimulus	-28.706	18.8962	22.7139	30169	211	227	30	13.2159	2.24779	623|834|841|1432|2185|2247|3356|3480|3553|3815|4313|4323|4353|4790|5290|5595|5599|5734|5743|5747|6198|6548|6714|6772|6869|7048|7099|7124|7132|7852	BDKRB1|CASP1|CASP8|MAPK14|PTK2B|FGF2|HTR2A|IGF1R|IL1B|KIT|MMP2|MMP14|MPO|NFKB1|PIK3CA|MAPK3|MAPK8|PTGER4|PTGS2|PTK2|RPS6KB1|SLC9A1|SRC|STAT1|TACR1|TGFBR2|TLR4|TNF|TNFRSF1A|CXCR4	-26.3032	-28.706	23.6677
GO:0001666	GO Biological Processes	19	response to hypoxia	-28.636	15.443	21.2929	30169	284	227	33	14.5374	2.33948	134|472|596|768|836|890|1543|1636|1803|1909|2033|2034|2168|2185|2475|3091|4193|4313|4323|4842|4843|5467|5468|5743|6548|6714|7015|7048|7124|7412|7422|7852|23411	ADORA1|ATM|BCL2|CA9|CASP3|CCNA2|CYP1A1|ACE|DPP4|EDNRA|EP300|EPAS1|FABP1|PTK2B|MTOR|HIF1A|MDM2|MMP2|MMP14|NOS1|NOS2|PPARD|PPARG|PTGS2|SLC9A1|SRC|TERT|TGFBR2|TNF|VCAM1|VEGFA|CXCR4|SIRT1	-26.2402	-30.5084	15.443
GO:0071219	GO Biological Processes	19	cellular response to molecule of bacterial origin	-28.33	18.3737	22.3643	30169	217	227	30	13.2159	2.24779	25|207|383|834|949|1019|1234|1432|1910|2950|3553|3569|3576|3717|4790|4843|5054|5467|5594|5595|5599|6714|7099|7124|7494|9971|10892|54106|64127|114548	ABL1|AKT1|ARG1|CASP1|SCARB1|CDK4|CCR5|MAPK14|EDNRB|GSTP1|IL1B|IL6|CXCL8|JAK2|NFKB1|NOS2|SERPINE1|PPARD|MAPK1|MAPK3|MAPK8|SRC|TLR4|TNF|XBP1|NR1H4|MALT1|TLR9|NOD2|NLRP3	-25.9412	-47.1224	19.6893
GO:0050865	GO Biological Processes	19	regulation of cell activation	-28.2991	8.40927	17.6078	30169	727	227	46	20.2643	2.66796	25|136|196|207|383|472|596|673|836|1269|1803|2064|2147|3105|3123|3553|3558|3569|3572|3717|3718|4282|4323|5156|5159|5170|5290|5320|5781|6469|6714|6777|6778|6850|6869|7048|7099|7124|7412|7494|8399|10892|11035|54106|64127|114548	ABL1|ADORA2B|AHR|AKT1|ARG1|ATM|BCL2|BRAF|CASP3|CNR2|DPP4|ERBB2|F2|HLA-A|HLA-DRB1|IL1B|IL2|IL6|IL6ST|JAK2|JAK3|MIF|MMP14|PDGFRA|PDGFRB|PDPK1|PIK3CA|PLA2G2A|PTPN11|SHH|SRC|STAT5B|STAT6|SYK|TACR1|TGFBR2|TLR4|TNF|VCAM1|XBP1|PLA2G10|MALT1|RIPK3|TLR9|NOD2|NLRP3	-25.9172	-28.2991	25.5583
GO:0071375	GO Biological Processes	19	cellular response to peptide hormone stimulus	-28.2815	17.0954	21.8433	30169	241	227	31	13.6564	2.27914	142|185|207|383|890|1019|1394|1545|1909|2645|2932|3480|3716|3717|3718|4790|5170|5290|5295|5315|5319|5468|5747|6198|6548|6714|6772|6774|6777|6778|7494	PARP1|AGTR1|AKT1|ARG1|CCNA2|CDK4|CRHR1|CYP1B1|EDNRA|GCK|GSK3B|IGF1R|JAK1|JAK2|JAK3|NFKB1|PDPK1|PIK3CA|PIK3R1|PKM|PLA2G1B|PPARG|PTK2|RPS6KB1|SLC9A1|SRC|STAT1|STAT3|STAT5B|STAT6|XBP1	-25.9062	-55.0431	17.0954
GO:0071214	GO Biological Processes	19	cellular response to abiotic stimulus	-28.1393	14.077	20.5091	30169	321	227	34	14.978	2.36853	142|472|598|624|834|836|841|894|1432|2033|2247|2475|3265|3480|3553|4193|4311|4313|4314|4318|4638|4790|5290|5295|5595|5599|5734|5743|6548|7099|7132|11200|23411|114548	PARP1|ATM|BCL2L1|BDKRB2|CASP1|CASP3|CASP8|CCND2|MAPK14|EP300|FGF2|MTOR|HRAS|IGF1R|IL1B|MDM2|MME|MMP2|MMP3|MMP9|MYLK|NFKB1|PIK3CA|PIK3R1|MAPK3|MAPK8|PTGER4|PTGS2|SLC9A1|TLR4|TNFRSF1A|CHEK2|SIRT1|NLRP3	-25.7772	-28.706	23.6677
GO:0104004	GO Biological Processes	19	cellular response to environmental stimulus	-28.1393	14.077	20.5091	30169	321	227	34	14.978	2.36853	142|472|598|624|834|836|841|894|1432|2033|2247|2475|3265|3480|3553|4193|4311|4313|4314|4318|4638|4790|5290|5295|5595|5599|5734|5743|6548|7099|7132|11200|23411|114548	PARP1|ATM|BCL2L1|BDKRB2|CASP1|CASP3|CASP8|CCND2|MAPK14|EP300|FGF2|MTOR|HRAS|IGF1R|IL1B|MDM2|MME|MMP2|MMP3|MMP9|MYLK|NFKB1|PIK3CA|PIK3R1|MAPK3|MAPK8|PTGER4|PTGS2|SLC9A1|TLR4|TNFRSF1A|CHEK2|SIRT1|NLRP3	-25.7772	-28.706	23.6677
GO:0070663	GO Biological Processes	19	regulation of leukocyte proliferation	-28.0941	15.81	21.2443	30169	269	227	32	14.0969	2.30969	196|383|472|596|598|836|2064|2950|3105|3123|3553|3558|3569|3572|3717|3718|3815|4282|5594|5595|5747|6469|6480|6777|6778|6850|6869|7048|7099|7412|11035|54106	AHR|ARG1|ATM|BCL2|BCL2L1|CASP3|ERBB2|GSTP1|HLA-A|HLA-DRB1|IL1B|IL2|IL6|IL6ST|JAK2|JAK3|KIT|MIF|MAPK1|MAPK3|PTK2|SHH|ST6GAL1|STAT5B|STAT6|SYK|TACR1|TGFBR2|TLR4|VCAM1|RIPK3|TLR9	-25.7384	-28.2991	25.5583
GO:0050678	GO Biological Processes	19	regulation of epithelial cell proliferation	-27.9533	11.8778	19.4047	30169	414	227	37	16.2996	2.45154	185|207|240|367|383|595|1019|1910|1956|2064|2152|2246|2247|2260|2321|2735|3091|3265|3791|5170|5241|5467|5468|6469|6772|6774|6869|7046|7124|7421|7422|7494|7498|23411|51738|64127|151306	AGTR1|AKT1|ALOX5|AR|ARG1|CCND1|CDK4|EDNRB|EGFR|ERBB2|F3|FGF1|FGF2|FGFR1|FLT1|GLI1|HIF1A|HRAS|KDR|PDPK1|PGR|PPARD|PPARG|SHH|STAT1|STAT3|TACR1|TGFBR1|TNF|VDR|VEGFA|XBP1|XDH|SIRT1|GHRL|NOD2|GPBAR1	-25.604	-27.9533	17.7204
GO:0007204	GO Biological Processes	19	positive regulation of cytosolic calcium ion concentration	-27.9408	19.1751	22.5108	30169	201	227	29	12.7753	2.21561	25|185|596|623|624|887|1234|1909|1910|2099|2149|2185|2833|3356|3558|3577|3579|3685|3717|3718|5156|5319|5733|5734|6869|7852|10803|51738|57007	ABL1|AGTR1|BCL2|BDKRB1|BDKRB2|CCKBR|CCR5|EDNRA|EDNRB|ESR1|F2R|PTK2B|CXCR3|HTR2A|IL2|CXCR1|CXCR2|ITGAV|JAK2|JAK3|PDGFRA|PLA2G1B|PTGER3|PTGER4|TACR1|CXCR4|CCR9|GHRL|ACKR3	-25.5977	-27.9408	19.1751
GO:0071363	GO Biological Processes	19	cellular response to growth factor stimulus	-27.6489	10.6214	18.6575	30169	488	227	39	17.1806	2.50364	25|142|207|383|836|890|1432|1956|2064|2246|2247|2260|2321|2908|3065|3066|3248|3480|3576|3791|4842|5156|5159|5170|5290|5468|5595|5747|5781|6198|6714|6774|6777|7046|7048|7099|7412|7422|23411	ABL1|PARP1|AKT1|ARG1|CASP3|CCNA2|MAPK14|EGFR|ERBB2|FGF1|FGF2|FGFR1|FLT1|NR3C1|HDAC1|HDAC2|HPGD|IGF1R|CXCL8|KDR|NOS1|PDGFRA|PDGFRB|PDPK1|PIK3CA|PPARG|MAPK3|PTK2|PTPN11|RPS6KB1|SRC|STAT3|STAT5B|TGFBR1|TGFBR2|TLR4|VCAM1|VEGFA|SIRT1	-25.312	-50.5759	26.1262
GO:0051345	GO Biological Processes	19	positive regulation of hydrolase activity	-26.7434	9.25132	17.6087	30169	589	227	41	18.0617	2.55335	185|207|834|841|1509|1612|1909|1956|2064|2099|2146|2149|2152|2168|2185|2247|2260|2321|2475|2932|3265|3356|3688|3717|3815|5156|5159|5170|5319|5468|5599|6774|6850|7124|7422|7498|10392|10892|11035|23411|114548	AGTR1|AKT1|CASP1|CASP8|CTSD|DAPK1|EDNRA|EGFR|ERBB2|ESR1|EZH2|F2R|F3|FABP1|PTK2B|FGF2|FGFR1|FLT1|MTOR|GSK3B|HRAS|HTR2A|ITGB1|JAK2|KIT|PDGFRA|PDGFRB|PDPK1|PLA2G1B|PPARG|MAPK8|STAT3|SYK|TNF|VEGFA|XDH|NOD1|MALT1|RIPK3|SIRT1|NLRP3	-24.4125	-26.7434	15.9484
GO:0044057	GO Biological Processes	19	regulation of system process	-26.7148	9.23564	17.5905	30169	590	227	41	18.0617	2.55335	25|134|136|142|185|624|1131|1394|1636|1890|1909|1910|2034|2149|2185|2539|2548|3274|3320|3356|3488|3558|3572|3717|3815|4193|4313|4842|4988|5468|5733|5743|5781|6198|6446|6548|6714|6869|7124|7132|51738	ABL1|ADORA1|ADORA2B|PARP1|AGTR1|BDKRB2|CHRM3|CRHR1|ACE|TYMP|EDNRA|EDNRB|EPAS1|F2R|PTK2B|G6PD|GAA|HRH2|HSP90AA1|HTR2A|IGFBP5|IL2|IL6ST|JAK2|KIT|MDM2|MMP2|NOS1|OPRM1|PPARG|PTGER3|PTGS2|PTPN11|RPS6KB1|SGK1|SLC9A1|SRC|TACR1|TNF|TNFRSF1A|GHRL	-24.3911	-26.7148	28.1916
GO:0010817	GO Biological Processes	19	regulation of hormone levels	-26.71	10.0256	18.0235	30169	517	227	39	17.1806	2.50364	134|185|240|1080|1394|1508|1543|1544|1545|1576|1636|1803|1910|2099|2645|2908|3091|3123|3172|3480|3553|3569|3717|4311|4790|4843|5156|5467|5468|5781|6469|6777|6869|7124|7941|8694|9971|51738|57016	ADORA1|AGTR1|ALOX5|CFTR|CRHR1|CTSB|CYP1A1|CYP1A2|CYP1B1|CYP3A4|ACE|DPP4|EDNRB|ESR1|GCK|NR3C1|HIF1A|HLA-DRB1|HNF4A|IGF1R|IL1B|IL6|JAK2|MME|NFKB1|NOS2|PDGFRA|PPARD|PPARG|PTPN11|SHH|STAT5B|TACR1|TNF|PLA2G7|DGAT1|NR1H4|GHRL|AKR1B10	-24.3911	-26.71	29.534
GO:0002694	GO Biological Processes	19	regulation of leukocyte activation	-26.6492	8.5296	17.1614	30169	670	227	43	18.9427	2.60078	25|136|196|207|383|472|596|673|836|1269|1803|2064|3105|3123|3553|3558|3569|3572|3717|3718|4282|4323|5170|5290|5320|5781|6469|6714|6777|6778|6850|6869|7048|7099|7124|7412|7494|8399|10892|11035|54106|64127|114548	ABL1|ADORA2B|AHR|AKT1|ARG1|ATM|BCL2|BRAF|CASP3|CNR2|DPP4|ERBB2|HLA-A|HLA-DRB1|IL1B|IL2|IL6|IL6ST|JAK2|JAK3|MIF|MMP14|PDPK1|PIK3CA|PLA2G2A|PTPN11|SHH|SRC|STAT5B|STAT6|SYK|TACR1|TGFBR2|TLR4|TNF|VCAM1|XBP1|PLA2G10|MALT1|RIPK3|TLR9|NOD2|NLRP3	-24.3361	-28.2991	25.5583
GO:0097305	GO Biological Processes	19	response to alcohol	-26.3466	15.8218	20.5725	30169	252	227	30	13.2159	2.24779	142|196|207|595|598|841|983|1019|1080|1234|1394|1545|1636|2185|2539|3066|3248|3480|3558|4988|5734|6198|6446|6480|6869|7046|7048|7124|7298|7412	PARP1|AHR|AKT1|CCND1|BCL2L1|CASP8|CDK1|CDK4|CFTR|CCR5|CRHR1|CYP1B1|ACE|PTK2B|G6PD|HDAC2|HPGD|IGF1R|IL2|OPRM1|PTGER4|RPS6KB1|SGK1|ST6GAL1|TACR1|TGFBR1|TGFBR2|TNF|TYMS|VCAM1	-24.0392	-26.3466	17.6512
GO:0071900	GO Biological Processes	19	regulation of protein serine/threonine kinase activity	-26.2998	11.7762	18.7712	30169	395	227	35	15.4185	2.39688	25|207|595|836|890|891|894|1956|1991|2064|2146|2185|2246|2247|2260|2321|2950|3265|3356|3553|3815|4282|5159|5319|5347|5468|5604|6714|6850|7099|7124|7422|23411|54106|64127	ABL1|AKT1|CCND1|CASP3|CCNA2|CCNB1|CCND2|EGFR|ELANE|ERBB2|EZH2|PTK2B|FGF1|FGF2|FGFR1|FLT1|GSTP1|HRAS|HTR2A|IL1B|KIT|MIF|PDGFRB|PLA2G1B|PLK1|PPARG|MAP2K1|SRC|SYK|TLR4|TNF|VEGFA|SIRT1|TLR9|NOD2	-23.9981	-50.5759	26.1262
GO:0071902	GO Biological Processes	19	positive regulation of protein serine/threonine kinase activity	-26.2582	16.8305	20.9379	30169	229	227	29	12.7753	2.21561	207|595|891|894|1956|1991|2064|2146|2185|2246|2247|2260|2321|3265|3356|3553|3815|4282|5159|5319|5604|6714|6850|7099|7124|7422|23411|54106|64127	AKT1|CCND1|CCNB1|CCND2|EGFR|ELANE|ERBB2|EZH2|PTK2B|FGF1|FGF2|FGFR1|FLT1|HRAS|HTR2A|IL1B|KIT|MIF|PDGFRB|PLA2G1B|MAP2K1|SRC|SYK|TLR4|TNF|VEGFA|SIRT1|TLR9|NOD2	-23.9622	-50.5759	26.1262
GO:0003013	GO Biological Processes	19	circulatory system process	-26.0692	10.0604	17.8241	30169	502	227	38	16.7401	2.4779	25|134|136|185|290|367|623|624|1131|1636|1909|1910|2149|2475|2548|3274|3356|3579|4313|4363|4842|4843|5243|5290|5467|5468|5742|5743|6446|6523|6548|6714|6772|6869|7124|7422|7852|9429	ABL1|ADORA1|ADORA2B|AGTR1|ANPEP|AR|BDKRB1|BDKRB2|CHRM3|ACE|EDNRA|EDNRB|F2R|MTOR|GAA|HRH2|HTR2A|CXCR2|MMP2|ABCC1|NOS1|NOS2|ABCB1|PIK3CA|PPARD|PPARG|PTGS1|PTGS2|SGK1|SLC5A1|SLC9A1|SRC|STAT1|TACR1|TNF|VEGFA|CXCR4|ABCG2	-23.7825	-26.7148	28.1916
GO:0045321	GO Biological Processes	19	leukocyte activation	-26.0676	9.24543	17.3817	30169	575	227	40	17.6211	2.52879	25|136|472|596|673|841|1803|2033|2064|2146|2185|2475|3105|3383|3558|3569|3576|3579|3688|3717|3718|3815|5295|5551|5734|6097|6469|6774|6777|6778|6850|7048|7099|7124|7412|8399|10803|10892|11035|54106	ABL1|ADORA2B|ATM|BCL2|BRAF|CASP8|DPP4|EP300|ERBB2|EZH2|PTK2B|MTOR|HLA-A|ICAM1|IL2|IL6|CXCL8|CXCR2|ITGB1|JAK2|JAK3|KIT|PIK3R1|PRF1|PTGER4|RORC|SHH|STAT3|STAT5B|STAT6|SYK|TGFBR2|TLR4|TNF|VCAM1|PLA2G10|CCR9|MALT1|RIPK3|TLR9	-23.7825	-37.9073	15.4538
GO:0070372	GO Biological Processes	19	regulation of ERK1 and ERK2 cascade	-25.9007	13.5013	19.4202	30169	315	227	32	14.0969	2.30969	25|673|1956|2064|2149|2185|2246|2247|2950|3123|3265|3356|3383|3553|3791|4282|4988|5156|5159|5320|5595|5604|5781|6714|6850|7099|7124|10392|54106|57007|64127|151306	ABL1|BRAF|EGFR|ERBB2|F2R|PTK2B|FGF1|FGF2|GSTP1|HLA-DRB1|HRAS|HTR2A|ICAM1|IL1B|KDR|MIF|OPRM1|PDGFRA|PDGFRB|PLA2G2A|MAPK3|MAP2K1|PTPN11|SRC|SYK|TLR4|TNF|NOD1|TLR9|ACKR3|NOD2|GPBAR1	-23.621	-50.5759	26.1262
GO:0043068	GO Biological Processes	19	positive regulation of programmed cell death	-25.7994	9.47572	17.4184	30169	547	227	39	17.1806	2.50364	25|142|472|836|841|1509|1545|1612|1636|2908|3248|3486|3569|3579|3688|3717|4170|4313|4318|4843|5159|5319|5468|5551|5599|5743|5915|5979|6548|6714|6850|7046|7124|7132|7153|7421|11035|11200|23411	ABL1|PARP1|ATM|CASP3|CASP8|CTSD|CYP1B1|DAPK1|ACE|NR3C1|HPGD|IGFBP3|IL6|CXCR2|ITGB1|JAK2|MCL1|MMP2|MMP9|NOS2|PDGFRB|PLA2G1B|PPARG|PRF1|MAPK8|PTGS2|RARB|RET|SLC9A1|SRC|SYK|TGFBR1|TNF|TNFRSF1A|TOP2A|VDR|RIPK3|CHEK2|SIRT1	-23.525	-29.2779	9.524
GO:0019216	GO Biological Processes	19	regulation of lipid metabolic process	-25.7798	12.6392	18.9874	30169	347	227	33	14.5374	2.33948	134|207|949|1019|2147|2168|2185|2246|2247|2321|2475|2908|3172|3248|3356|3417|3480|3553|3815|4790|5156|5159|5467|5468|5743|5747|6097|6714|6777|7124|9971|23411|64127	ADORA1|AKT1|SCARB1|CDK4|F2|FABP1|PTK2B|FGF1|FGF2|FLT1|MTOR|NR3C1|HNF4A|HPGD|HTR2A|IDH1|IGF1R|IL1B|KIT|NFKB1|PDGFRA|PDGFRB|PPARD|PPARG|PTGS2|PTK2|RORC|SRC|STAT5B|TNF|NR1H4|SIRT1|NOD2	-23.5107	-25.7798	20.7122
GO:0040008	GO Biological Processes	19	regulation of growth	-25.7734	8.73241	16.9946	30169	624	227	41	18.0617	2.55335	25|185|207|367|596|598|623|983|1019|1432|1956|2064|2100|2147|2185|2247|2475|2539|2735|2932|3091|3172|3486|3487|3488|3558|4323|5290|5467|6198|6446|6548|6774|6777|7046|7048|7086|7422|7852|23411|51738	ABL1|AGTR1|AKT1|AR|BCL2|BCL2L1|BDKRB1|CDK1|CDK4|MAPK14|EGFR|ERBB2|ESR2|F2|PTK2B|FGF2|MTOR|G6PD|GLI1|GSK3B|HIF1A|HNF4A|IGFBP3|IGFBP4|IGFBP5|IL2|MMP14|PIK3CA|PPARD|RPS6KB1|SGK1|SLC9A1|STAT3|STAT5B|TGFBR1|TGFBR2|TKT|VEGFA|CXCR4|SIRT1|GHRL	-23.5095	-25.7734	11.2026
GO:0048661	GO Biological Processes	19	positive regulation of smooth muscle cell proliferation	-25.7384	29.8354	24.8949	30169	98	227	22	9.69163	1.96358	207|1786|1991|2247|3065|3248|3480|3488|3569|3717|4313|4318|5159|5290|5743|6198|6714|6772|7015|7048|7099|7124	AKT1|DNMT1|ELANE|FGF2|HDAC1|HPGD|IGF1R|IGFBP5|IL6|JAK2|MMP2|MMP9|PDGFRB|PIK3CA|PTGS2|RPS6KB1|SRC|STAT1|TERT|TGFBR2|TLR4|TNF	-23.4797	-25.7384	29.8354
GO:0000165	GO Biological Processes	19	MAPK cascade	-25.5879	17.1488	20.7875	30169	217	227	28	12.3348	2.18256	25|367|673|983|1234|1432|1956|2185|2247|2260|3265|3486|3487|3551|3553|3685|3791|4790|5594|5595|5599|5604|5734|5979|7099|7124|10392|64127	ABL1|AR|BRAF|CDK1|CCR5|MAPK14|EGFR|PTK2B|FGF2|FGFR1|HRAS|IGFBP3|IGFBP4|IKBKB|IL1B|ITGAV|KDR|NFKB1|MAPK1|MAPK3|MAPK8|MAP2K1|PTGER4|RET|TLR4|TNF|NOD1|NOD2	-23.3342	-25.5879	31.4135
GO:0045785	GO Biological Processes	19	positive regulation of cell adhesion	-25.5255	10.1599	17.6886	30169	484	227	37	16.2996	2.45154	25|207|240|472|673|1803|1991|2064|2185|2932|3105|3123|3553|3558|3569|3572|3685|3716|3717|3718|3791|5290|5781|5879|5979|6469|6714|6777|6850|7048|7124|7412|7422|7494|10892|64127|114548	ABL1|AKT1|ALOX5|ATM|BRAF|DPP4|ELANE|ERBB2|PTK2B|GSK3B|HLA-A|HLA-DRB1|IL1B|IL2|IL6|IL6ST|ITGAV|JAK1|JAK2|JAK3|KDR|PIK3CA|PTPN11|RAC1|RET|SHH|SRC|STAT5B|SYK|TGFBR2|TNF|VCAM1|VEGFA|XBP1|MALT1|NOD2|NLRP3	-23.2769	-28.2991	25.5583
GO:0043406	GO Biological Processes	19	positive regulation of MAP kinase activity	-25.4545	26.1262	23.7099	30169	117	227	23	10.1322	2.00281	1956|1991|2064|2146|2185|2246|2247|2260|2321|3265|3356|3553|3815|4282|5159|5319|6714|6850|7099|7124|7422|54106|64127	EGFR|ELANE|ERBB2|EZH2|PTK2B|FGF1|FGF2|FGFR1|FLT1|HRAS|HTR2A|IL1B|KIT|MIF|PDGFRB|PLA2G1B|SRC|SYK|TLR4|TNF|VEGFA|TLR9|NOD2	-23.2108	-50.5759	26.1262
GO:0048660	GO Biological Processes	19	regulation of smooth muscle cell proliferation	-25.4068	19.7456	21.6544	30169	175	227	26	11.4537	2.11371	207|1786|1991|2247|3065|3248|3480|3486|3488|3569|3717|4313|4318|5159|5290|5467|5468|5743|6198|6714|6772|6869|7015|7048|7099|7124	AKT1|DNMT1|ELANE|FGF2|HDAC1|HPGD|IGF1R|IGFBP3|IGFBP5|IL6|JAK2|MMP2|MMP9|PDGFRB|PIK3CA|PPARD|PPARG|PTGS2|RPS6KB1|SRC|STAT1|TACR1|TERT|TGFBR2|TLR4|TNF	-23.168	-25.7384	29.8354
GO:0051090	GO Biological Processes	19	regulation of DNA-binding transcription factor activity	-25.3768	10.5386	17.8307	30169	454	227	36	15.859	2.42454	207|367|1147|1545|2033|2099|2100|2146|2735|3066|3551|3553|3569|3717|3815|5319|5468|5595|5599|6446|6469|6774|6850|7099|7124|7422|8399|8517|9971|10392|10892|11035|23411|54106|64127|114548	AKT1|AR|CHUK|CYP1B1|EP300|ESR1|ESR2|EZH2|GLI1|HDAC2|IKBKB|IL1B|IL6|JAK2|KIT|PLA2G1B|PPARG|MAPK3|MAPK8|SGK1|SHH|STAT3|SYK|TLR4|TNF|VEGFA|PLA2G10|IKBKG|NR1H4|NOD1|MALT1|RIPK3|SIRT1|TLR9|NOD2|NLRP3	-23.1429	-25.3768	31.6436
GO:0080135	GO Biological Processes	19	regulation of cellular response to stress	-25.2515	7.87167	16.3187	30169	726	227	43	18.9427	2.60078	25|142|207|240|331|472|596|598|624|673|1956|2033|2185|2475|2932|2950|3091|3265|3480|3553|4170|4193|4233|4282|4314|4988|5295|5594|5595|5604|5743|7099|7124|7422|7494|7498|8841|10392|11200|23411|54106|57007|64127	ABL1|PARP1|AKT1|ALOX5|XIAP|ATM|BCL2|BCL2L1|BDKRB2|BRAF|EGFR|EP300|PTK2B|MTOR|GSK3B|GSTP1|HIF1A|HRAS|IGF1R|IL1B|MCL1|MDM2|MET|MIF|MMP3|OPRM1|PIK3R1|MAPK1|MAPK3|MAP2K1|PTGS2|TLR4|TNF|VEGFA|XBP1|XDH|HDAC3|NOD1|CHEK2|SIRT1|TLR9|ACKR3|NOD2	-23.0223	-25.2515	21.4793
GO:0031349	GO Biological Processes	19	positive regulation of defense response	-25.01	13.4202	19.0451	30169	307	227	31	13.6564	2.27914	136|185|383|834|1636|2033|3320|3551|3553|3558|3569|3572|3717|4363|5054|5320|5595|5733|5734|5743|6714|6777|6850|7099|7124|7132|7941|10392|54106|64127|114548	ADORA2B|AGTR1|ARG1|CASP1|ACE|EP300|HSP90AA1|IKBKB|IL1B|IL2|IL6|IL6ST|JAK2|ABCC1|SERPINE1|PLA2G2A|MAPK3|PTGER3|PTGER4|PTGS2|SRC|STAT5B|SYK|TLR4|TNF|TNFRSF1A|PLA2G7|NOD1|TLR9|NOD2|NLRP3	-22.7856	-44.7257	18.9862
GO:0018108	GO Biological Processes	19	peptidyl-tyrosine phosphorylation	-24.936	20.6371	21.7529	30169	161	227	25	11.0132	2.07782	25|1956|2064|2185|2260|2321|3356|3480|3558|3716|3717|3718|3791|3815|4233|5156|5159|5315|5595|5604|5747|5979|6714|6850|64127	ABL1|EGFR|ERBB2|PTK2B|FGFR1|FLT1|HTR2A|IGF1R|IL2|JAK1|JAK2|JAK3|KDR|KIT|MET|PDGFRA|PDGFRB|PKM|MAPK3|MAP2K1|PTK2|RET|SRC|SYK|NOD2	-22.7163	-50.5759	26.1262
GO:0018212	GO Biological Processes	19	peptidyl-tyrosine modification	-24.7965	20.3839	21.6061	30169	163	227	25	11.0132	2.07782	25|1956|2064|2185|2260|2321|3356|3480|3558|3716|3717|3718|3791|3815|4233|5156|5159|5315|5595|5604|5747|5979|6714|6850|64127	ABL1|EGFR|ERBB2|PTK2B|FGFR1|FLT1|HTR2A|IGF1R|IL2|JAK1|JAK2|JAK3|KDR|KIT|MET|PDGFRA|PDGFRB|PKM|MAPK3|MAP2K1|PTK2|RET|SRC|SYK|NOD2	-22.5815	-50.5759	26.1262
GO:0008015	GO Biological Processes	19	blood circulation	-24.5587	10.9944	17.7632	30169	411	227	34	14.978	2.36853	25|134|136|185|290|367|623|624|1131|1636|1909|1910|2149|2475|2548|3274|3356|3579|4313|4842|4843|5290|5467|5468|5742|5743|6446|6548|6714|6772|6869|7124|7422|7852	ABL1|ADORA1|ADORA2B|AGTR1|ANPEP|AR|BDKRB1|BDKRB2|CHRM3|ACE|EDNRA|EDNRB|F2R|MTOR|GAA|HRH2|HTR2A|CXCR2|MMP2|NOS1|NOS2|PIK3CA|PPARD|PPARG|PTGS1|PTGS2|SGK1|SLC9A1|SRC|STAT1|TACR1|TNF|VEGFA|CXCR4	-22.3482	-26.7148	28.1916
GO:0045834	GO Biological Processes	19	positive regulation of lipid metabolic process	-23.9883	20.7122	21.3536	30169	154	227	24	10.5727	2.04087	134|207|949|2147|2168|2185|2246|2247|2321|2475|3356|3480|3553|3815|5156|5159|5467|5468|5743|5747|6714|7124|9971|64127	ADORA1|AKT1|SCARB1|F2|FABP1|PTK2B|FGF1|FGF2|FLT1|MTOR|HTR2A|IGF1R|IL1B|KIT|PDGFRA|PDGFRB|PPARD|PPARG|PTGS2|PTK2|SRC|TNF|NR1H4|NOD2	-21.7824	-25.7798	20.7122
GO:0070374	GO Biological Processes	19	positive regulation of ERK1 and ERK2 cascade	-23.9225	16.0914	19.6951	30169	223	227	27	11.8943	2.14861	25|673|1956|2149|2185|2246|2247|3123|3265|3356|3383|3791|4282|4988|5156|5159|5320|5595|5604|5781|6714|7099|7124|10392|57007|64127|151306	ABL1|BRAF|EGFR|F2R|PTK2B|FGF1|FGF2|HLA-DRB1|HRAS|HTR2A|ICAM1|KDR|MIF|OPRM1|PDGFRA|PDGFRB|PLA2G2A|MAPK3|MAP2K1|PTPN11|SRC|TLR4|TNF|NOD1|ACKR3|NOD2|GPBAR1	-21.7211	-50.5759	26.1262
GO:0019221	GO Biological Processes	19	cytokine-mediated signaling pathway	-23.8541	11.6199	17.7983	30169	366	227	32	14.0969	2.30969	207|330|1147|1234|2152|2185|2833|3551|3553|3569|3572|3576|3577|3579|3716|3717|3718|3815|5595|5781|6714|6772|6774|6777|6778|6850|7124|7132|7852|10803|23411|57007	AKT1|BIRC3|CHUK|CCR5|F3|PTK2B|CXCR3|IKBKB|IL1B|IL6|IL6ST|CXCL8|CXCR1|CXCR2|JAK1|JAK2|JAK3|KIT|MAPK3|PTPN11|SRC|STAT1|STAT3|STAT5B|STAT6|SYK|TNF|TNFRSF1A|CXCR4|CCR9|SIRT1|ACKR3	-21.6572	-33.8084	18.6531
GO:0034614	GO Biological Processes	19	cellular response to reactive oxygen species	-23.8198	24.7785	22.5342	30169	118	227	22	9.69163	1.96358	25|207|383|983|1147|1545|1956|2146|2168|3066|3569|4313|4318|4353|5156|5594|5595|5599|6714|6778|11035|23411	ABL1|AKT1|ARG1|CDK1|CHUK|CYP1B1|EGFR|EZH2|FABP1|HDAC2|IL6|MMP2|MMP9|MPO|PDGFRA|MAPK1|MAPK3|MAPK8|SRC|STAT6|RIPK3|SIRT1	-21.6273	-39.0928	24.7785
GO:0002685	GO Biological Processes	19	regulation of leukocyte migration	-23.5059	15.5341	19.3076	30169	231	227	27	11.8943	2.14861	25|134|207|623|1803|1991|2185|2833|3383|3569|3576|3579|4282|4323|5054|5295|5594|5595|5734|5747|5879|6869|7124|7422|7941|11035|64127	ABL1|ADORA1|AKT1|BDKRB1|DPP4|ELANE|PTK2B|CXCR3|ICAM1|IL6|CXCL8|CXCR2|MIF|MMP14|SERPINE1|PIK3R1|MAPK1|MAPK3|PTGER4|PTK2|RAC1|TACR1|TNF|VEGFA|PLA2G7|RIPK3|NOD2	-21.3177	-23.5059	20.0608
GO:0043405	GO Biological Processes	19	regulation of MAP kinase activity	-23.3189	17.8633	20.0867	30169	186	227	25	11.0132	2.07782	1956|1991|2064|2146|2185|2246|2247|2260|2321|2950|3265|3356|3553|3815|4282|5159|5319|5468|6714|6850|7099|7124|7422|54106|64127	EGFR|ELANE|ERBB2|EZH2|PTK2B|FGF1|FGF2|FGFR1|FLT1|GSTP1|HRAS|HTR2A|IL1B|KIT|MIF|PDGFRB|PLA2G1B|PPARG|SRC|SYK|TLR4|TNF|VEGFA|TLR9|NOD2	-21.1359	-50.5759	26.1262
GO:0045765	GO Biological Processes	19	regulation of angiogenesis	-23.3154	11.8051	17.6781	30169	349	227	31	13.6564	2.27914	25|240|1545|2064|2152|2185|2246|2247|2321|3091|3553|3569|3576|3579|3688|3716|3791|5054|5170|5315|5468|6772|6774|7015|7048|7124|7422|7494|7852|23411|51738	ABL1|ALOX5|CYP1B1|ERBB2|F3|PTK2B|FGF1|FGF2|FLT1|HIF1A|IL1B|IL6|CXCL8|CXCR2|ITGB1|JAK1|KDR|SERPINE1|PDPK1|PKM|PPARG|STAT1|STAT3|TERT|TGFBR2|TNF|VEGFA|XBP1|CXCR4|SIRT1|GHRL	-21.1359	-53.1526	17.7678
GO:0045766	GO Biological Processes	19	positive regulation of angiogenesis	-23.2594	17.7678	20.0268	30169	187	227	25	11.0132	2.07782	25|1545|2152|2185|2246|2247|2321|3091|3553|3576|3579|3688|3716|3791|5054|5170|5315|6774|7015|7048|7422|7494|7852|23411|51738	ABL1|CYP1B1|F3|PTK2B|FGF1|FGF2|FLT1|HIF1A|IL1B|CXCL8|CXCR2|ITGB1|JAK1|KDR|SERPINE1|PDPK1|PKM|STAT3|TERT|TGFBR2|VEGFA|XBP1|CXCR4|SIRT1|GHRL	-21.0924	-53.1526	17.7678
GO:0046777	GO Biological Processes	19	protein autophosphorylation	-23.2594	17.7678	20.0268	30169	187	227	25	11.0132	2.07782	25|207|472|1612|1956|2064|2185|2260|2321|2475|2932|3480|3717|3791|3815|5156|5159|5170|5595|5747|6714|6790|6850|11035|11200	ABL1|AKT1|ATM|DAPK1|EGFR|ERBB2|PTK2B|FGFR1|FLT1|MTOR|GSK3B|IGF1R|JAK2|KDR|KIT|PDGFRA|PDGFRB|PDPK1|MAPK3|PTK2|SRC|AURKA|SYK|RIPK3|CHEK2	-21.0924	-50.5759	26.1262
GO:1904018	GO Biological Processes	19	positive regulation of vasculature development	-23.2594	17.7678	20.0268	30169	187	227	25	11.0132	2.07782	25|1545|2152|2185|2246|2247|2321|3091|3553|3576|3579|3688|3716|3791|5054|5170|5315|6774|7015|7048|7422|7494|7852|23411|51738	ABL1|CYP1B1|F3|PTK2B|FGF1|FGF2|FLT1|HIF1A|IL1B|CXCL8|CXCR2|ITGB1|JAK1|KDR|SERPINE1|PDPK1|PKM|STAT3|TERT|TGFBR2|VEGFA|XBP1|CXCR4|SIRT1|GHRL	-21.0924	-53.1526	17.7678
GO:1901342	GO Biological Processes	19	regulation of vasculature development	-23.0922	11.6056	17.5019	30169	355	227	31	13.6564	2.27914	25|240|1545|2064|2152|2185|2246|2247|2321|3091|3553|3569|3576|3579|3688|3716|3791|5054|5170|5315|5468|6772|6774|7015|7048|7124|7422|7494|7852|23411|51738	ABL1|ALOX5|CYP1B1|ERBB2|F3|PTK2B|FGF1|FGF2|FLT1|HIF1A|IL1B|IL6|CXCL8|CXCR2|ITGB1|JAK1|KDR|SERPINE1|PDPK1|PKM|PPARG|STAT1|STAT3|TERT|TGFBR2|TNF|VEGFA|XBP1|CXCR4|SIRT1|GHRL	-20.9293	-53.1526	17.7678
GO:0051249	GO Biological Processes	19	regulation of lymphocyte activation	-22.957	8.58187	15.9545	30169	573	227	37	16.2996	2.45154	25|196|207|383|472|596|673|836|1803|2064|3105|3123|3553|3558|3569|3572|3717|3718|4282|4323|5290|5781|6469|6714|6777|6778|6850|6869|7048|7099|7412|7494|10892|11035|54106|64127|114548	ABL1|AHR|AKT1|ARG1|ATM|BCL2|BRAF|CASP3|DPP4|ERBB2|HLA-A|HLA-DRB1|IL1B|IL2|IL6|IL6ST|JAK2|JAK3|MIF|MMP14|PIK3CA|PTPN11|SHH|SRC|STAT5B|STAT6|SYK|TACR1|TGFBR2|TLR4|VCAM1|XBP1|MALT1|RIPK3|TLR9|NOD2|NLRP3	-20.7982	-28.2991	25.5583
GO:0048511	GO Biological Processes	19	rhythmic process	-22.9176	13.7825	18.3703	30169	270	227	28	12.3348	2.18256	196|836|983|1545|2033|2099|2146|2475|2932|3065|3066|3172|3480|4313|4843|4988|5156|5241|5468|5599|6097|6714|6777|7124|7153|7298|8841|23411	AHR|CASP3|CDK1|CYP1B1|EP300|ESR1|EZH2|MTOR|GSK3B|HDAC1|HDAC2|HNF4A|IGF1R|MMP2|NOS2|OPRM1|PDGFRA|PGR|PPARG|MAPK8|RORC|SRC|STAT5B|TNF|TOP2A|TYMS|HDAC3|SIRT1	-20.7629	-22.9176	14.3978
GO:0050900	GO Biological Processes	19	leukocyte migration	-22.7192	14.5279	18.5878	30169	247	227	27	11.8943	2.14861	134|240|1234|1269|1910|1991|2321|3383|3553|3569|3576|3577|3579|3688|3695|3815|4313|4318|5295|5319|5979|6714|6777|6850|7124|7412|7852	ADORA1|ALOX5|CCR5|CNR2|EDNRB|ELANE|FLT1|ICAM1|IL1B|IL6|CXCL8|CXCR1|CXCR2|ITGB1|ITGB7|KIT|MMP2|MMP9|PIK3R1|PLA2G1B|RET|SRC|STAT5B|SYK|TNF|VCAM1|CXCR4	-20.5685	-29.6709	15.1889
GO:0051046	GO Biological Processes	19	regulation of secretion	-22.7087	8.10645	15.6061	30169	623	227	38	16.7401	2.4779	134|136|185|240|673|1080|1394|1636|1910|2149|2645|2932|3091|3123|3172|3356|3553|3569|3717|4282|4843|4988|5170|5319|5467|5468|5733|5781|6446|6850|6869|7099|7124|7132|7494|8399|9971|51738	ADORA1|ADORA2B|AGTR1|ALOX5|BRAF|CFTR|CRHR1|ACE|EDNRB|F2R|GCK|GSK3B|HIF1A|HLA-DRB1|HNF4A|HTR2A|IL1B|IL6|JAK2|MIF|NOS2|OPRM1|PDPK1|PLA2G1B|PPARD|PPARG|PTGER3|PTPN11|SGK1|SYK|TACR1|TLR4|TNF|TNFRSF1A|XBP1|PLA2G10|NR1H4|GHRL	-20.5619	-26.71	29.534
GO:0050679	GO Biological Processes	19	positive regulation of epithelial cell proliferation	-22.5636	15.4263	18.8695	30169	224	227	26	11.4537	2.11371	185|207|367|383|595|1956|2064|2152|2246|2247|2260|3091|3265|3791|5170|6469|6774|6869|7046|7124|7422|7494|23411|51738|64127|151306	AGTR1|AKT1|AR|ARG1|CCND1|EGFR|ERBB2|F3|FGF1|FGF2|FGFR1|HIF1A|HRAS|KDR|PDPK1|SHH|STAT3|TACR1|TGFBR1|TNF|VEGFA|XBP1|SIRT1|GHRL|NOD2|GPBAR1	-20.4207	-27.9533	17.7204
GO:1902532	GO Biological Processes	19	negative regulation of intracellular signal transduction	-22.4224	8.6363	15.7953	30169	554	227	36	15.859	2.42454	25|207|472|596|598|624|841|1432|2099|2475|2932|2950|3065|3091|3480|3553|3688|4170|4193|4233|4282|4318|5468|5743|6714|6772|7099|7494|7498|8841|9971|11200|23411|54106|57007|114548	ABL1|AKT1|ATM|BCL2|BCL2L1|BDKRB2|CASP8|MAPK14|ESR1|MTOR|GSK3B|GSTP1|HDAC1|HIF1A|IGF1R|IL1B|ITGB1|MCL1|MDM2|MET|MIF|MMP9|PPARG|PTGS2|SRC|STAT1|TLR4|XBP1|XDH|HDAC3|NR1H4|CHEK2|SIRT1|TLR9|ACKR3|NLRP3	-20.2835	-25.2515	21.4793
GO:2001233	GO Biological Processes	19	regulation of apoptotic signaling pathway	-22.4122	11.016	16.9709	30169	374	227	31	13.6564	2.27914	142|207|367|596|598|624|2260|2932|2950|3065|3091|3383|3553|3685|3717|4170|4193|4282|4318|5054|5743|5979|6198|6714|7015|7046|7124|7494|11035|23411|57007	PARP1|AKT1|AR|BCL2|BCL2L1|BDKRB2|FGFR1|GSK3B|GSTP1|HDAC1|HIF1A|ICAM1|IL1B|ITGAV|JAK2|MCL1|MDM2|MIF|MMP9|SERPINE1|PTGS2|RET|RPS6KB1|SRC|TERT|TGFBR1|TNF|XBP1|RIPK3|SIRT1|ACKR3	-20.2771	-25.2515	21.4793
GO:1903829	GO Biological Processes	19	positive regulation of protein localization	-22.1473	9.72462	16.2544	30169	451	227	33	14.5374	2.33948	142|207|983|1080|1432|1956|2064|2147|2645|2932|3091|3123|3265|3320|3553|3688|3717|5170|5295|5319|5347|5467|5468|5599|5743|6469|6714|7015|7099|7124|8841|9971|51738	PARP1|AKT1|CDK1|CFTR|MAPK14|EGFR|ERBB2|F2|GCK|GSK3B|HIF1A|HLA-DRB1|HRAS|HSP90AA1|IL1B|ITGB1|JAK2|PDPK1|PIK3R1|PLA2G1B|PLK1|PPARD|PPARG|MAPK8|PTGS2|SHH|SRC|TERT|TLR4|TNF|HDAC3|NR1H4|GHRL	-20.0161	-22.1473	26.5806
GO:2001234	GO Biological Processes	19	negative regulation of apoptotic signaling pathway	-22.1177	14.8304	18.4528	30169	233	227	26	11.4537	2.11371	207|367|596|598|624|2932|2950|3065|3091|3383|3553|3685|4170|4193|4282|4318|5054|5743|6198|6714|7015|7046|7124|7494|23411|57007	AKT1|AR|BCL2|BCL2L1|BDKRB2|GSK3B|GSTP1|HDAC1|HIF1A|ICAM1|IL1B|ITGAV|MCL1|MDM2|MIF|MMP9|SERPINE1|PTGS2|RPS6KB1|SRC|TERT|TGFBR1|TNF|XBP1|SIRT1|ACKR3	-19.9903	-25.2515	21.4793
GO:1903131	GO Biological Processes	19	mononuclear cell differentiation	-22.0232	12.0068	17.2625	30169	321	227	29	12.7753	2.21561	25|472|596|673|2033|2064|2146|2185|2475|3558|3569|3688|3718|3815|5295|5468|5734|6097|6469|6774|6777|6778|6850|7048|7412|7422|10803|10892|11035	ABL1|ATM|BCL2|BRAF|EP300|ERBB2|EZH2|PTK2B|MTOR|IL2|IL6|ITGB1|JAK3|KIT|PIK3R1|PPARG|PTGER4|RORC|SHH|STAT3|STAT5B|STAT6|SYK|TGFBR2|VCAM1|VEGFA|CCR9|MALT1|RIPK3	-19.8994	-37.9073	15.4538
GO:0043065	GO Biological Processes	19	positive regulation of apoptotic process	-21.9703	8.74362	15.6902	30169	532	227	35	15.4185	2.39688	25|472|836|841|1509|1545|1612|1636|2908|3248|3486|3569|3579|3688|3717|4170|4313|4318|5159|5319|5468|5599|5743|5915|5979|6548|6714|7046|7124|7132|7153|7421|11035|11200|23411	ABL1|ATM|CASP3|CASP8|CTSD|CYP1B1|DAPK1|ACE|NR3C1|HPGD|IGFBP3|IL6|CXCR2|ITGB1|JAK2|MCL1|MMP2|MMP9|PDGFRB|PLA2G1B|PPARG|MAPK8|PTGS2|RARB|RET|SLC9A1|SRC|TGFBR1|TNF|TNFRSF1A|TOP2A|VDR|RIPK3|CHEK2|SIRT1	-19.8503	-29.2779	9.524
GO:0009991	GO Biological Processes	19	response to extracellular stimulus	-21.9652	9.14718	15.8972	30169	494	227	34	14.978	2.36853	136|207|249|383|595|596|1432|1543|1545|1636|2475|2539|3480|4353|4988|5467|5468|5594|5595|5599|5743|6198|6714|6772|7048|7124|7298|7412|7421|7494|9971|23411|51738|64127	ADORA2B|AKT1|ALPL|ARG1|CCND1|BCL2|MAPK14|CYP1A1|CYP1B1|ACE|MTOR|G6PD|IGF1R|MPO|OPRM1|PPARD|PPARG|MAPK1|MAPK3|MAPK8|PTGS2|RPS6KB1|SRC|STAT1|TGFBR2|TNF|TYMS|VCAM1|VDR|XBP1|NR1H4|SIRT1|GHRL|NOD2	-19.8489	-21.9652	17.1779
GO:0031667	GO Biological Processes	19	response to nutrient levels	-21.7609	9.45216	15.9756	30169	464	227	33	14.5374	2.33948	207|249|383|595|596|1432|1543|1545|1636|2475|2539|3480|4353|4988|5467|5468|5594|5595|5599|5743|6198|6714|6772|7048|7124|7298|7412|7421|7494|9971|23411|51738|64127	AKT1|ALPL|ARG1|CCND1|BCL2|MAPK14|CYP1A1|CYP1B1|ACE|MTOR|G6PD|IGF1R|MPO|OPRM1|PPARD|PPARG|MAPK1|MAPK3|MAPK8|PTGS2|RPS6KB1|SRC|STAT1|TGFBR2|TNF|TYMS|VCAM1|VDR|XBP1|NR1H4|SIRT1|GHRL|NOD2	-19.6483	-21.9652	17.1779
GO:0070665	GO Biological Processes	19	positive regulation of leukocyte proliferation	-21.7257	18.304	19.5243	30169	167	227	23	10.1322	2.00281	596|598|3105|3553|3558|3569|3572|3717|3718|3815|4282|5594|5595|5747|6469|6480|6777|6850|6869|7048|7099|7412|54106	BCL2|BCL2L1|HLA-A|IL1B|IL2|IL6|IL6ST|JAK2|JAK3|KIT|MIF|MAPK1|MAPK3|PTK2|SHH|ST6GAL1|STAT5B|SYK|TACR1|TGFBR2|TLR4|VCAM1|TLR9	-19.6167	-28.2991	25.5583
GO:0050867	GO Biological Processes	19	positive regulation of cell activation	-21.6735	9.39144	15.9128	30169	467	227	33	14.5374	2.33948	25|136|207|596|1803|3105|3123|3553|3558|3569|3572|3717|3718|4282|4323|5159|5290|5781|6469|6714|6777|6778|6850|6869|7048|7099|7124|7412|7494|10892|54106|64127|114548	ABL1|ADORA2B|AKT1|BCL2|DPP4|HLA-A|HLA-DRB1|IL1B|IL2|IL6|IL6ST|JAK2|JAK3|MIF|MMP14|PDGFRB|PIK3CA|PTPN11|SHH|SRC|STAT5B|STAT6|SYK|TACR1|TGFBR2|TLR4|TNF|VCAM1|XBP1|MALT1|TLR9|NOD2|NLRP3	-19.5681	-28.2991	25.5583
GO:0032944	GO Biological Processes	19	regulation of mononuclear cell proliferation	-21.6445	14.2201	18.016	30169	243	227	26	11.4537	2.11371	196|383|472|596|598|836|2064|3105|3123|3553|3558|3569|3572|3717|3718|4282|6469|6480|6777|6850|6869|7048|7099|7412|11035|54106	AHR|ARG1|ATM|BCL2|BCL2L1|CASP3|ERBB2|HLA-A|HLA-DRB1|IL1B|IL2|IL6|IL6ST|JAK2|JAK3|MIF|SHH|ST6GAL1|STAT5B|SYK|TACR1|TGFBR2|TLR4|VCAM1|RIPK3|TLR9	-19.5427	-28.2991	25.5583
GO:0097190	GO Biological Processes	19	apoptotic signaling pathway	-21.1895	11.9272	16.8931	30169	312	227	28	12.3348	2.18256	25|134|472|596|598|624|834|836|841|1545|1612|2033|2932|3265|3553|3558|3685|3717|4170|5170|5295|5467|6469|7124|7132|11035|11200|23411	ABL1|ADORA1|ATM|BCL2|BCL2L1|BDKRB2|CASP1|CASP3|CASP8|CYP1B1|DAPK1|EP300|GSK3B|HRAS|IL1B|IL2|ITGAV|JAK2|MCL1|PDPK1|PIK3R1|PPARD|SHH|TNF|TNFRSF1A|RIPK3|CHEK2|SIRT1	-19.0912	-21.1895	20.3046
GO:0050729	GO Biological Processes	19	positive regulation of inflammatory response	-21.155	18.9862	19.4839	30169	154	227	22	9.69163	1.96358	136|185|834|1636|3553|3558|3569|3572|3717|4363|5054|5320|5733|5734|5743|6777|7099|7124|7132|7941|54106|114548	ADORA2B|AGTR1|CASP1|ACE|IL1B|IL2|IL6|IL6ST|JAK2|ABCC1|SERPINE1|PLA2G2A|PTGER3|PTGER4|PTGS2|STAT5B|TLR4|TNF|TNFRSF1A|PLA2G7|TLR9|NLRP3	-19.0602	-44.7257	18.9862
GO:0048545	GO Biological Processes	19	response to steroid hormone	-21.1405	12.6798	17.1886	30169	283	227	27	11.8943	2.14861	142|249|367|383|595|596|836|1545|1636|2099|2100|2908|3417|3480|3569|3717|5241|5290|5467|5743|6198|6446|6714|6869|7048|7124|7298	PARP1|ALPL|AR|ARG1|CCND1|BCL2|CASP3|CYP1B1|ACE|ESR1|ESR2|NR3C1|IDH1|IGF1R|IL6|JAK2|PGR|PIK3CA|PPARD|PTGS2|RPS6KB1|SGK1|SRC|TACR1|TGFBR2|TNF|TYMS	-19.0493	-21.1405	24.7262
GO:0002696	GO Biological Processes	19	positive regulation of leukocyte activation	-21.0987	9.45089	15.7267	30169	450	227	32	14.0969	2.30969	25|136|207|596|1803|3105|3123|3553|3558|3569|3572|3717|3718|4282|4323|5290|5781|6469|6714|6777|6778|6850|6869|7048|7099|7124|7412|7494|10892|54106|64127|114548	ABL1|ADORA2B|AKT1|BCL2|DPP4|HLA-A|HLA-DRB1|IL1B|IL2|IL6|IL6ST|JAK2|JAK3|MIF|MMP14|PIK3CA|PTPN11|SHH|SRC|STAT5B|STAT6|SYK|TACR1|TGFBR2|TLR4|TNF|VCAM1|XBP1|MALT1|TLR9|NOD2|NLRP3	-19.0109	-28.2991	25.5583
GO:0022407	GO Biological Processes	19	regulation of cell-cell adhesion	-21.0237	8.95062	15.4497	30169	490	227	33	14.5374	2.33948	25|207|240|383|836|1432|1803|1991|2064|3105|3123|3553|3558|3569|3572|3716|3717|3718|5290|5747|5781|6469|6714|6777|6850|7048|7124|7412|7422|7494|10892|64127|114548	ABL1|AKT1|ALOX5|ARG1|CASP3|MAPK14|DPP4|ELANE|ERBB2|HLA-A|HLA-DRB1|IL1B|IL2|IL6|IL6ST|JAK1|JAK2|JAK3|PIK3CA|PTK2|PTPN11|SHH|SRC|STAT5B|SYK|TGFBR2|TNF|VCAM1|VEGFA|XBP1|MALT1|NOD2|NLRP3	-18.9393	-28.2991	25.5583
GO:0050920	GO Biological Processes	19	regulation of chemotaxis	-20.9918	14.446	17.8231	30169	230	227	25	11.0132	2.07782	1803|1991|2152|2185|2246|2247|2260|3569|3576|3579|3791|4233|4282|5054|5156|5159|5594|5595|5747|5879|6480|7422|7852|7941|64127	DPP4|ELANE|F3|PTK2B|FGF1|FGF2|FGFR1|IL6|CXCL8|CXCR2|KDR|MET|MIF|SERPINE1|PDGFRA|PDGFRB|MAPK1|MAPK3|PTK2|RAC1|ST6GAL1|VEGFA|CXCR4|PLA2G7|NOD2	-18.9109	-23.5059	20.0608
GO:0008285	GO Biological Processes	19	negative regulation of cell population proliferation	-20.9599	6.72927	14.2082	30169	790	227	40	17.6211	2.52879	134|240|367|383|472|596|836|1545|2064|2149|2185|2247|2321|2950|3123|3172|3265|3486|3488|3553|3558|3569|3576|3717|4988|5467|5468|5604|5743|5915|6469|6772|6774|7046|7048|7124|7421|7498|51738|57007	ADORA1|ALOX5|AR|ARG1|ATM|BCL2|CASP3|CYP1B1|ERBB2|F2R|PTK2B|FGF2|FLT1|GSTP1|HLA-DRB1|HNF4A|HRAS|IGFBP3|IGFBP5|IL1B|IL2|IL6|CXCL8|JAK2|OPRM1|PPARD|PPARG|MAP2K1|PTGS2|RARB|SHH|STAT1|STAT3|TGFBR1|TGFBR2|TNF|VDR|XDH|GHRL|ACKR3	-18.8823	-20.9599	13.9898
GO:0046649	GO Biological Processes	19	lymphocyte activation	-20.8385	9.26557	15.5372	30169	459	227	32	14.0969	2.30969	25|472|596|673|841|1803|2033|2064|2146|2185|2475|3105|3383|3558|3569|3688|3718|3815|5295|5551|5734|6097|6469|6774|6777|6778|6850|7099|7412|10803|10892|11035	ABL1|ATM|BCL2|BRAF|CASP8|DPP4|EP300|ERBB2|EZH2|PTK2B|MTOR|HLA-A|ICAM1|IL2|IL6|ITGB1|JAK3|KIT|PIK3R1|PRF1|PTGER4|RORC|SHH|STAT3|STAT5B|STAT6|SYK|TLR4|VCAM1|CCR9|MALT1|RIPK3	-18.7643	-37.9073	15.4538
GO:0030162	GO Biological Processes	19	regulation of proteolysis	-20.8348	6.91096	14.2732	30169	750	227	39	17.1806	2.50364	207|330|331|834|841|1017|1508|1509|1612|2147|2149|2152|2168|2185|2932|3065|3066|3553|3717|4193|4318|4323|5054|5347|5468|5743|5747|6469|6714|6774|6790|6850|7124|7422|7498|10392|10892|23411|114548	AKT1|BIRC3|XIAP|CASP1|CASP8|CDK2|CTSB|CTSD|DAPK1|F2|F2R|F3|FABP1|PTK2B|GSK3B|HDAC1|HDAC2|IL1B|JAK2|MDM2|MMP9|MMP14|SERPINE1|PLK1|PPARG|PTGS2|PTK2|SHH|SRC|STAT3|AURKA|SYK|TNF|VEGFA|XDH|NOD1|MALT1|SIRT1|NLRP3	-18.764	-26.7434	15.9484
GO:1901214	GO Biological Processes	19	regulation of neuron death	-20.7071	11.4501	16.4922	30169	325	227	28	12.3348	2.18256	25|134|142|207|472|595|596|598|673|836|841|2149|2185|2539|2908|2932|3091|3265|3572|3717|3791|4170|5290|7015|7099|7124|8517|23411	ABL1|ADORA1|PARP1|AKT1|ATM|CCND1|BCL2|BCL2L1|BRAF|CASP3|CASP8|F2R|PTK2B|G6PD|NR3C1|GSK3B|HIF1A|HRAS|IL6ST|JAK2|KDR|MCL1|PIK3CA|TERT|TLR4|TNF|IKBKG|SIRT1	-18.6395	-20.7071	12.8026
GO:0060326	GO Biological Processes	19	cell chemotaxis	-20.6859	15.1889	17.9656	30169	210	227	24	10.5727	2.04087	185|240|1234|1269|1910|2321|2833|3553|3569|3576|3577|3579|3815|4313|4363|5156|5159|5319|6850|7412|7422|7852|10803|57007	AGTR1|ALOX5|CCR5|CNR2|EDNRB|FLT1|CXCR3|IL1B|IL6|CXCL8|CXCR1|CXCR2|KIT|MMP2|ABCC1|PDGFRA|PDGFRB|PLA2G1B|SYK|VCAM1|VEGFA|CXCR4|CCR9|ACKR3	-18.6216	-29.6709	15.1889
GO:0050673	GO Biological Processes	19	epithelial cell proliferation	-20.5386	17.8285	18.8155	30169	164	227	22	9.69163	1.96358	367|595|598|949|1956|2099|2246|2247|3486|3487|3488|3569|3791|3815|4323|5467|5594|5604|6469|6778|7046|7124	AR|CCND1|BCL2L1|SCARB1|EGFR|ESR1|FGF1|FGF2|IGFBP3|IGFBP4|IGFBP5|IL6|KDR|KIT|MMP14|PPARD|MAPK1|MAP2K1|SHH|STAT6|TGFBR1|TNF	-18.4775	-29.0634	17.8285
GO:0032102	GO Biological Processes	19	negative regulation of response to external stimulus	-20.526	9.515	15.5394	30169	433	227	31	13.6564	2.27914	134|142|240|383|1269|1432|1803|1991|2147|2247|2950|3105|3123|3558|4282|4790|5054|5156|5467|5468|5734|6480|6714|6850|7124|7132|8399|9971|51738|64127|114548	ADORA1|PARP1|ALOX5|ARG1|CNR2|MAPK14|DPP4|ELANE|F2|FGF2|GSTP1|HLA-A|HLA-DRB1|IL2|MIF|NFKB1|SERPINE1|PDGFRA|PPARD|PPARG|PTGER4|ST6GAL1|SRC|SYK|TNF|TNFRSF1A|PLA2G10|NR1H4|GHRL|NOD2|NLRP3	-18.4682	-20.526	14.446
GO:0051251	GO Biological Processes	19	positive regulation of lymphocyte activation	-20.4413	9.96773	15.7209	30169	400	227	30	13.2159	2.24779	25|207|596|1803|3105|3123|3553|3558|3569|3572|3717|3718|4282|4323|5290|5781|6469|6714|6777|6778|6850|6869|7048|7099|7412|7494|10892|54106|64127|114548	ABL1|AKT1|BCL2|DPP4|HLA-A|HLA-DRB1|IL1B|IL2|IL6|IL6ST|JAK2|JAK3|MIF|MMP14|PIK3CA|PTPN11|SHH|SRC|STAT5B|STAT6|SYK|TACR1|TGFBR2|TLR4|VCAM1|XBP1|MALT1|TLR9|NOD2|NLRP3	-18.3866	-28.2991	25.5583
GO:0042060	GO Biological Processes	19	wound healing	-20.3857	11.1416	16.2279	30169	334	227	28	12.3348	2.18256	836|949|1432|2064|2147|2149|2152|2162|2246|2247|3091|3172|3569|3688|3791|4988|5156|5159|5290|5467|6469|6714|6850|7046|7048|7099|7422|10855	CASP3|SCARB1|MAPK14|ERBB2|F2|F2R|F3|F13A1|FGF1|FGF2|HIF1A|HNF4A|IL6|ITGB1|KDR|OPRM1|PDGFRA|PDGFRB|PIK3CA|PPARD|SHH|SRC|SYK|TGFBR1|TGFBR2|TLR4|VEGFA|HPSE	-18.3342	-29.2377	11.7003
GO:0007507	GO Biological Processes	19	heart development	-20.3322	8.12717	14.7693	30169	556	227	34	14.978	2.36853	25|472|836|841|983|1636|1909|2033|2064|2247|2475|2548|3091|3480|3688|3791|4193|4313|5156|5159|5467|5594|5595|5604|5747|5781|5915|6469|6548|7046|7048|7132|7412|7422	ABL1|ATM|CASP3|CASP8|CDK1|ACE|EDNRA|EP300|ERBB2|FGF2|MTOR|GAA|HIF1A|IGF1R|ITGB1|KDR|MDM2|MMP2|PDGFRA|PDGFRB|PPARD|MAPK1|MAPK3|MAP2K1|PTK2|PTPN11|RARB|SHH|SLC9A1|TGFBR1|TGFBR2|TNFRSF1A|VCAM1|VEGFA	-18.2839	-20.3322	15.4197
GO:1903039	GO Biological Processes	19	positive regulation of leukocyte cell-cell adhesion	-20.2652	12.5654	16.7757	30169	275	227	26	11.4537	2.11371	25|207|240|1803|1991|3105|3123|3553|3558|3569|3572|3717|3718|5290|5781|6469|6714|6777|6850|7048|7124|7412|7494|10892|64127|114548	ABL1|AKT1|ALOX5|DPP4|ELANE|HLA-A|HLA-DRB1|IL1B|IL2|IL6|IL6ST|JAK2|JAK3|PIK3CA|PTPN11|SHH|SRC|STAT5B|SYK|TGFBR2|TNF|VCAM1|XBP1|MALT1|NOD2|NLRP3	-18.22	-28.2991	25.5583
GO:0030098	GO Biological Processes	19	lymphocyte differentiation	-20.225	12.5199	16.7403	30169	276	227	26	11.4537	2.11371	25|472|596|673|2033|2064|2146|2185|2475|3558|3569|3688|3718|3815|5295|5734|6097|6469|6774|6777|6778|6850|7412|10803|10892|11035	ABL1|ATM|BCL2|BRAF|EP300|ERBB2|EZH2|PTK2B|MTOR|IL2|IL6|ITGB1|JAK3|KIT|PIK3R1|PTGER4|RORC|SHH|STAT3|STAT5B|STAT6|SYK|VCAM1|CCR9|MALT1|RIPK3	-18.183	-37.9073	15.4538
GO:0062012	GO Biological Processes	19	regulation of small molecule metabolic process	-20.2113	10.9772	16.0853	30169	339	227	28	12.3348	2.18256	136|142|207|2033|2168|2185|2246|2475|2645|2908|3091|3356|3486|3487|3553|3815|4790|4842|4843|5467|5468|5743|6097|6714|6774|7124|9971|23411	ADORA2B|PARP1|AKT1|EP300|FABP1|PTK2B|FGF1|MTOR|GCK|NR3C1|HIF1A|HTR2A|IGFBP3|IGFBP4|IL1B|KIT|NFKB1|NOS1|NOS2|PPARD|PPARG|PTGS2|RORC|SRC|STAT3|TNF|NR1H4|SIRT1	-18.1723	-25.7798	20.7122
GO:0044703	GO Biological Processes	19	multi-organism reproductive process	-20.2052	15.7566	17.9536	30169	194	227	23	10.1322	2.00281	142|207|367|383|596|1394|1508|1543|1636|2099|3248|3488|3553|4313|4318|5241|5467|5743|6777|6869|7048|7421|51738	PARP1|AKT1|AR|ARG1|BCL2|CRHR1|CTSB|CYP1A1|ACE|ESR1|HPGD|IGFBP5|IL1B|MMP2|MMP9|PGR|PPARD|PTGS2|STAT5B|TACR1|TGFBR2|VDR|GHRL	-18.1694	-20.2052	31.8967
GO:0070201	GO Biological Processes	19	regulation of establishment of protein localization	-20.0734	8.33803	14.7828	30169	526	227	33	14.5374	2.33948	240|983|1080|1432|1509|2064|2149|2645|2932|3091|3123|3172|3265|3320|3553|3569|3717|4843|4988|5295|5319|5467|5468|5599|5743|5781|6469|6714|7099|7124|8841|9971|51738	ALOX5|CDK1|CFTR|MAPK14|CTSD|ERBB2|F2R|GCK|GSK3B|HIF1A|HLA-DRB1|HNF4A|HRAS|HSP90AA1|IL1B|IL6|JAK2|NOS2|OPRM1|PIK3R1|PLA2G1B|PPARD|PPARG|MAPK8|PTGS2|PTPN11|SHH|SRC|TLR4|TNF|HDAC3|NR1H4|GHRL	-18.0426	-22.1473	26.5806
GO:0030879	GO Biological Processes	19	mammary gland development	-20.0724	20.7661	19.5126	30169	128	227	20	8.81057	1.88131	207|367|383|595|2099|2247|2908|3091|3488|3717|4790|5241|5594|6714|6777|6778|7048|7421|7422|7498	AKT1|AR|ARG1|CCND1|ESR1|FGF2|NR3C1|HIF1A|IGFBP5|JAK2|NFKB1|PGR|MAPK1|SRC|STAT5B|STAT6|TGFBR2|VDR|VEGFA|XDH	-18.0426	-20.0724	75.9446
GO:1903037	GO Biological Processes	19	regulation of leukocyte cell-cell adhesion	-20.0677	10.2233	15.6911	30169	377	227	29	12.7753	2.21561	25|207|240|383|836|1803|1991|2064|3105|3123|3553|3558|3569|3572|3717|3718|5290|5781|6469|6714|6777|6850|7048|7124|7412|7494|10892|64127|114548	ABL1|AKT1|ALOX5|ARG1|CASP3|DPP4|ELANE|ERBB2|HLA-A|HLA-DRB1|IL1B|IL2|IL6|IL6ST|JAK2|JAK3|PIK3CA|PTPN11|SHH|SRC|STAT5B|SYK|TGFBR2|TNF|VCAM1|XBP1|MALT1|NOD2|NLRP3	-18.0409	-28.2991	25.5583
GO:0007548	GO Biological Processes	19	sex differentiation	-20.0267	12.2971	16.566	30169	281	227	26	11.4537	2.11371	367|472|595|596|598|836|1545|1636|2099|3172|3417|3791|3815|4313|4323|5156|5159|5241|5781|6469|6714|6777|7046|7422|23411|54106	AR|ATM|CCND1|BCL2|BCL2L1|CASP3|CYP1B1|ACE|ESR1|HNF4A|IDH1|KDR|KIT|MMP2|MMP14|PDGFRA|PDGFRB|PGR|PTPN11|SHH|SRC|STAT5B|TGFBR1|VEGFA|SIRT1|TLR9	-18.0029	-20.0267	24.6117
GO:0043122	GO Biological Processes	19	regulation of I-kappaB kinase/NF-kappaB signaling	-19.8825	13.0297	16.7971	30169	255	227	25	11.0132	2.07782	25|330|834|841|1147|2099|2149|2950|3065|3123|3551|3553|5170|6772|7099|7124|7132|8517|9971|10392|10892|23411|23476|54106|64127	ABL1|BIRC3|CASP1|CASP8|CHUK|ESR1|F2R|GSTP1|HDAC1|HLA-DRB1|IKBKB|IL1B|PDPK1|STAT1|TLR4|TNF|TNFRSF1A|IKBKG|NR1H4|NOD1|MALT1|SIRT1|BRD4|TLR9|NOD2	-17.8616	-25.3768	31.6436
GO:0044706	GO Biological Processes	19	multi-multicellular organism process	-19.7506	15.058	17.4986	30169	203	227	23	10.1322	2.00281	142|207|367|383|596|1394|1508|1543|1636|2099|3248|3488|3553|4313|4318|5241|5467|5743|6777|6869|7048|7421|51738	PARP1|AKT1|AR|ARG1|BCL2|CRHR1|CTSB|CYP1A1|ACE|ESR1|HPGD|IGFBP5|IL1B|MMP2|MMP9|PGR|PPARD|PTGS2|STAT5B|TACR1|TGFBR2|VDR|GHRL	-17.7327	-20.2052	31.8967
GO:0051223	GO Biological Processes	19	regulation of protein transport	-19.6967	8.48882	14.7175	30169	501	227	32	14.0969	2.30969	240|983|1080|1432|2064|2149|2645|2932|3091|3123|3172|3265|3320|3553|3569|3717|4843|4988|5295|5319|5467|5468|5599|5743|5781|6469|6714|7099|7124|8841|9971|51738	ALOX5|CDK1|CFTR|MAPK14|ERBB2|F2R|GCK|GSK3B|HIF1A|HLA-DRB1|HNF4A|HRAS|HSP90AA1|IL1B|IL6|JAK2|NOS2|OPRM1|PIK3R1|PLA2G1B|PPARD|PPARG|MAPK8|PTGS2|PTPN11|SHH|SRC|TLR4|TNF|HDAC3|NR1H4|GHRL	-17.6817	-22.1473	26.5806
GO:0022409	GO Biological Processes	19	positive regulation of cell-cell adhesion	-19.6667	11.144	15.9344	30169	322	227	27	11.8943	2.14861	25|207|240|1803|1991|3105|3123|3553|3558|3569|3572|3716|3717|3718|5290|5781|6469|6714|6777|6850|7048|7124|7412|7494|10892|64127|114548	ABL1|AKT1|ALOX5|DPP4|ELANE|HLA-A|HLA-DRB1|IL1B|IL2|IL6|IL6ST|JAK1|JAK2|JAK3|PIK3CA|PTPN11|SHH|SRC|STAT5B|SYK|TGFBR2|TNF|VCAM1|XBP1|MALT1|NOD2|NLRP3	-17.6547	-28.2991	25.5583
GO:0043281	GO Biological Processes	19	regulation of cysteine-type endopeptidase activity involved in apoptotic process	-19.6526	14.9111	17.4014	30169	205	227	23	10.1322	2.00281	207|330|331|834|841|1509|1612|2149|2152|2168|3717|4318|5468|5743|6714|6850|7124|7422|7498|10392|10892|23411|114548	AKT1|BIRC3|XIAP|CASP1|CASP8|CTSD|DAPK1|F2R|F3|FABP1|JAK2|MMP9|PPARG|PTGS2|SRC|SYK|TNF|VEGFA|XDH|NOD1|MALT1|SIRT1|NLRP3	-17.6434	-26.7434	15.9484
GO:0043269	GO Biological Processes	19	regulation of ion transport	-19.6206	6.84877	13.8109	30169	718	227	37	16.2996	2.45154	25|134|207|383|596|623|1080|1131|1394|1612|1636|1909|2147|2149|2185|2539|2645|3356|3553|3688|3718|4282|4318|4638|4842|4988|5159|5170|5243|5319|5743|6548|6850|7124|7852|8399|54106	ABL1|ADORA1|AKT1|ARG1|BCL2|BDKRB1|CFTR|CHRM3|CRHR1|DAPK1|ACE|EDNRA|F2|F2R|PTK2B|G6PD|GCK|HTR2A|IL1B|ITGB1|JAK3|MIF|MMP9|MYLK|NOS1|OPRM1|PDGFRB|PDPK1|ABCB1|PLA2G1B|PTGS2|SLC9A1|SYK|TNF|CXCR4|PLA2G10|TLR9	-17.6142	-19.6206	16.2077
GO:0048608	GO Biological Processes	19	reproductive structure development	-19.4546	11.6739	16.0685	30169	296	227	26	11.4537	2.11371	367|472|595|596|598|836|1545|1636|2099|2735|3417|3791|3815|4313|4323|5156|5159|5241|5781|6469|6714|6777|7046|7422|23411|54106	AR|ATM|CCND1|BCL2|BCL2L1|CASP3|CYP1B1|ACE|ESR1|GLI1|IDH1|KDR|KIT|MMP2|MMP14|PDGFRA|PDGFRB|PGR|PTPN11|SHH|SRC|STAT5B|TGFBR1|VEGFA|SIRT1|TLR9	-17.4511	-20.0267	24.6117
GO:0051091	GO Biological Processes	19	positive regulation of DNA-binding transcription factor activity	-19.4324	12.4909	16.3902	30169	266	227	25	11.0132	2.07782	207|367|1147|2033|2099|2100|3551|3553|3569|3717|3815|5319|5468|6469|6774|7099|7124|7422|8517|10392|10892|11035|54106|64127|114548	AKT1|AR|CHUK|EP300|ESR1|ESR2|IKBKB|IL1B|IL6|JAK2|KIT|PLA2G1B|PPARG|SHH|STAT3|TLR4|TNF|VEGFA|IKBKG|NOD1|MALT1|RIPK3|TLR9|NOD2|NLRP3	-17.4318	-25.3768	31.6436
GO:0018105	GO Biological Processes	19	peptidyl-serine phosphorylation	-19.3713	15.8047	17.5868	30169	185	227	22	9.69163	1.96358	207|472|596|983|1017|1147|1432|2475|2932|3551|5170|5347|5594|5599|6198|6446|6714|6790|6850|7046|7048|11200	AKT1|ATM|BCL2|CDK1|CDK2|CHUK|MAPK14|MTOR|GSK3B|IKBKB|PDPK1|PLK1|MAPK1|MAPK8|RPS6KB1|SGK1|SRC|AURKA|SYK|TGFBR1|TGFBR2|CHEK2	-17.3735	-19.3713	19.2613
GO:0050670	GO Biological Processes	19	regulation of lymphocyte proliferation	-19.3451	13.3459	16.6846	30169	239	227	24	10.5727	2.04087	196|383|472|596|836|2064|3105|3123|3553|3558|3569|3572|3717|3718|4282|6469|6777|6850|6869|7048|7099|7412|11035|54106	AHR|ARG1|ATM|BCL2|CASP3|ERBB2|HLA-A|HLA-DRB1|IL1B|IL2|IL6|IL6ST|JAK2|JAK3|MIF|SHH|STAT5B|SYK|TACR1|TGFBR2|TLR4|VCAM1|RIPK3|TLR9	-17.35	-28.2991	25.5583
GO:0061458	GO Biological Processes	19	reproductive system development	-19.3075	11.5183	15.9419	30169	300	227	26	11.4537	2.11371	367|472|595|596|598|836|1545|1636|2099|2735|3417|3791|3815|4313|4323|5156|5159|5241|5781|6469|6714|6777|7046|7422|23411|54106	AR|ATM|CCND1|BCL2|BCL2L1|CASP3|CYP1B1|ACE|ESR1|GLI1|IDH1|KDR|KIT|MMP2|MMP14|PDGFRA|PDGFRB|PGR|PTPN11|SHH|SRC|STAT5B|TGFBR1|VEGFA|SIRT1|TLR9	-17.3153	-20.0267	24.6117
GO:0003018	GO Biological Processes	19	vascular process in circulatory system	-19.2739	12.3058	16.2481	30169	270	227	25	11.0132	2.07782	25|134|136|185|624|1131|1636|1909|1910|2149|3274|3356|3579|4313|4363|4842|5243|5467|5743|6523|6714|6869|7124|7422|9429	ABL1|ADORA1|ADORA2B|AGTR1|BDKRB2|CHRM3|ACE|EDNRA|EDNRB|F2R|HRH2|HTR2A|CXCR2|MMP2|ABCC1|NOS1|ABCB1|PPARD|PTGS2|SLC5A1|SRC|TACR1|TNF|VEGFA|ABCG2	-17.2844	-26.7148	28.1916
GO:1903530	GO Biological Processes	19	regulation of secretion by cell	-19.1012	7.74877	14.1127	30169	566	227	33	14.5374	2.33948	134|136|185|240|673|1080|1394|2149|2645|2932|3091|3123|3172|3356|3553|3569|3717|4282|4843|4988|5170|5319|5467|5468|5781|6850|6869|7099|7124|7132|8399|9971|51738	ADORA1|ADORA2B|AGTR1|ALOX5|BRAF|CFTR|CRHR1|F2R|GCK|GSK3B|HIF1A|HLA-DRB1|HNF4A|HTR2A|IL1B|IL6|JAK2|MIF|NOS2|OPRM1|PDPK1|PLA2G1B|PPARD|PPARG|PTPN11|SYK|TACR1|TLR4|TNF|TNFRSF1A|PLA2G10|NR1H4|GHRL	-17.1159	-26.71	29.534
GO:0009314	GO Biological Processes	19	response to radiation	-19.0999	8.93967	14.7085	30169	446	227	30	13.2159	2.24779	142|207|472|595|596|598|673|836|894|1432|1956|1991|2033|3091|3265|3688|3815|4193|4311|4313|4314|4318|4988|5295|5599|5743|7124|7412|11200|23411	PARP1|AKT1|ATM|CCND1|BCL2|BCL2L1|BRAF|CASP3|CCND2|MAPK14|EGFR|ELANE|EP300|HIF1A|HRAS|ITGB1|KIT|MDM2|MME|MMP2|MMP3|MMP9|OPRM1|PIK3R1|MAPK8|PTGS2|TNF|VCAM1|CHEK2|SIRT1	-17.1159	-19.0999	66.4515
GO:0050863	GO Biological Processes	19	regulation of T cell activation	-19.0049	9.89704	15.1157	30169	376	227	28	12.3348	2.18256	25|207|383|673|836|1803|2064|3105|3123|3553|3558|3569|3572|3717|3718|5290|5781|6469|6714|6777|6850|7048|7412|7494|10892|11035|64127|114548	ABL1|AKT1|ARG1|BRAF|CASP3|DPP4|ERBB2|HLA-A|HLA-DRB1|IL1B|IL2|IL6|IL6ST|JAK2|JAK3|PIK3CA|PTPN11|SHH|SRC|STAT5B|SYK|TGFBR2|VCAM1|XBP1|MALT1|RIPK3|NOD2|NLRP3	-17.0236	-28.2991	25.5583
GO:0050731	GO Biological Processes	19	positive regulation of peptidyl-tyrosine phosphorylation	-18.9652	15.1496	17.1704	30169	193	227	22	9.69163	1.96358	25|134|1636|1956|2185|2475|3066|3356|3558|3569|3572|3717|3815|4282|5781|6714|6850|7124|7132|7422|51738|64127	ABL1|ADORA1|ACE|EGFR|PTK2B|MTOR|HDAC2|HTR2A|IL2|IL6|IL6ST|JAK2|KIT|MIF|PTPN11|SRC|SYK|TNF|TNFRSF1A|VEGFA|GHRL|NOD2	-16.9866	-18.9652	56.9585
GO:0050778	GO Biological Processes	19	positive regulation of immune response	-18.9163	7.64077	13.9866	30169	574	227	33	14.5374	2.33948	25|136|596|673|1991|2033|3105|3123|3265|3320|3551|3553|3558|3569|3572|3717|5290|5319|5594|5747|6714|6777|6778|6850|7099|7124|7494|8517|10892|23411|54106|64127|114548	ABL1|ADORA2B|BCL2|BRAF|ELANE|EP300|HLA-A|HLA-DRB1|HRAS|HSP90AA1|IKBKB|IL1B|IL2|IL6|IL6ST|JAK2|PIK3CA|PLA2G1B|MAPK1|PTK2|SRC|STAT5B|STAT6|SYK|TLR4|TNF|XBP1|IKBKG|MALT1|SIRT1|TLR9|NOD2|NLRP3	-16.9403	-18.9163	12.3058
GO:0042542	GO Biological Processes	19	response to hydrogen peroxide	-18.7893	22.5684	19.3687	30169	106	227	18	7.92952	1.79337	25|383|596|836|983|1545|2146|2168|2185|3066|3569|4313|5159|6714|6772|6778|11035|23411	ABL1|ARG1|BCL2|CASP3|CDK1|CYP1B1|EZH2|FABP1|PTK2B|HDAC2|IL6|MMP2|PDGFRB|SRC|STAT1|STAT6|RIPK3|SIRT1	-16.8159	-39.0928	24.7785
GO:0001667	GO Biological Processes	19	ameboidal-type cell migration	-18.7692	14.842	16.9714	30169	197	227	22	9.69163	1.96358	25|207|949|1545|1803|1909|1910|2185|2247|3091|3688|3695|3791|3815|3964|5290|5467|5781|5979|6469|7046|7422	ABL1|AKT1|SCARB1|CYP1B1|DPP4|EDNRA|EDNRB|PTK2B|FGF2|HIF1A|ITGB1|ITGB7|KDR|KIT|LGALS8|PIK3CA|PPARD|PTPN11|RET|SHH|TGFBR1|VEGFA	-16.7985	-18.7692	49.8387
GO:0008406	GO Biological Processes	19	gonad development	-18.7282	13.5856	16.499	30169	225	227	23	10.1322	2.00281	367|472|595|596|598|836|1545|1636|2099|3417|3791|3815|4313|4323|5156|5159|5241|6714|6777|7046|7422|23411|54106	AR|ATM|CCND1|BCL2|BCL2L1|CASP3|CYP1B1|ACE|ESR1|IDH1|KDR|KIT|MMP2|MMP14|PDGFRA|PDGFRB|PGR|SRC|STAT5B|TGFBR1|VEGFA|SIRT1|TLR9	-16.7602	-20.0267	24.6117
GO:0007565	GO Biological Processes	19	female pregnancy	-18.6439	16.04	17.3239	30169	174	227	21	9.2511	1.92311	142|207|367|383|596|1394|1508|1636|2099|3248|3488|3553|4313|4318|5241|5467|5743|6777|7048|7421|51738	PARP1|AKT1|AR|ARG1|BCL2|CRHR1|CTSB|ACE|ESR1|HPGD|IGFBP5|IL1B|MMP2|MMP9|PGR|PPARD|PTGS2|STAT5B|TGFBR2|VDR|GHRL	-16.6784	-20.2052	31.8967
GO:0010634	GO Biological Processes	19	positive regulation of epithelial cell migration	-18.5389	15.8578	17.2126	30169	176	227	21	9.2511	1.92311	25|207|949|2185|2246|2247|2260|2475|3091|3791|4233|4318|5170|5743|5747|5879|6714|6869|7048|7422|23411	ABL1|AKT1|SCARB1|PTK2B|FGF1|FGF2|FGFR1|MTOR|HIF1A|KDR|MET|MMP9|PDPK1|PTGS2|PTK2|RAC1|SRC|TACR1|TGFBR2|VEGFA|SIRT1	-16.576	-27.9533	17.7204
GO:1903522	GO Biological Processes	19	regulation of blood circulation	-18.5227	12.3153	15.9241	30169	259	227	24	10.5727	2.04087	25|134|185|624|1131|1636|1909|1910|2034|2149|2548|3274|3320|3356|3558|3717|4193|4313|4842|5743|6548|6869|7124|51738	ABL1|ADORA1|AGTR1|BDKRB2|CHRM3|ACE|EDNRA|EDNRB|EPAS1|F2R|GAA|HRH2|HSP90AA1|HTR2A|IL2|JAK2|MDM2|MMP2|NOS1|PTGS2|SLC9A1|TACR1|TNF|GHRL	-16.5624	-26.7148	28.1916
GO:0045137	GO Biological Processes	19	development of primary sexual characteristics	-18.5115	13.2903	16.2912	30169	230	227	23	10.1322	2.00281	367|472|595|596|598|836|1545|1636|2099|3417|3791|3815|4313|4323|5156|5159|5241|6714|6777|7046|7422|23411|54106	AR|ATM|CCND1|BCL2|BCL2L1|CASP3|CYP1B1|ACE|ESR1|IDH1|KDR|KIT|MMP2|MMP14|PDGFRA|PDGFRB|PGR|SRC|STAT5B|TGFBR1|VEGFA|SIRT1|TLR9	-16.5538	-20.0267	24.6117
GO:0018209	GO Biological Processes	19	peptidyl-serine modification	-18.4367	14.3327	16.6369	30169	204	227	22	9.69163	1.96358	207|472|596|983|1017|1147|1432|2475|2932|3551|5170|5347|5594|5599|6198|6446|6714|6790|6850|7046|7048|11200	AKT1|ATM|BCL2|CDK1|CDK2|CHUK|MAPK14|MTOR|GSK3B|IKBKB|PDPK1|PLK1|MAPK1|MAPK8|RPS6KB1|SGK1|SRC|AURKA|SYK|TGFBR1|TGFBR2|CHEK2	-16.484	-19.3713	19.2613
GO:1901654	GO Biological Processes	19	response to ketone	-18.4367	14.3327	16.6369	30169	204	227	22	9.69163	1.96358	142|196|207|367|383|595|598|768|1019|1080|1545|1636|2908|3480|3717|5290|5734|6198|6446|6714|6869|7298	PARP1|AHR|AKT1|AR|ARG1|CCND1|BCL2L1|CA9|CDK4|CFTR|CYP1B1|ACE|NR3C1|IGF1R|JAK2|PIK3CA|PTGER4|RPS6KB1|SGK1|SRC|TACR1|TYMS	-16.484	-21.1405	24.7262
GO:0051222	GO Biological Processes	19	positive regulation of protein transport	-18.3752	11.3013	15.4546	30169	294	227	25	11.0132	2.07782	983|1080|1432|2064|2645|2932|3091|3123|3265|3320|3553|3717|5295|5319|5467|5468|5599|5743|6469|6714|7099|7124|8841|9971|51738	CDK1|CFTR|MAPK14|ERBB2|GCK|GSK3B|HIF1A|HLA-DRB1|HRAS|HSP90AA1|IL1B|JAK2|PIK3R1|PLA2G1B|PPARD|PPARG|MAPK8|PTGS2|SHH|SRC|TLR4|TNF|HDAC3|NR1H4|GHRL	-16.4251	-22.1473	26.5806
GO:0060284	GO Biological Processes	19	regulation of cell development	-18.317	7.98449	13.9338	30169	516	227	31	13.6564	2.27914	25|207|596|673|1636|1910|2146|2147|2247|2475|2932|3065|3066|3091|3551|3553|3569|3572|3688|3815|4311|4988|5604|5879|5979|6469|6790|7124|7132|7422|7852	ABL1|AKT1|BCL2|BRAF|ACE|EDNRB|EZH2|F2|FGF2|MTOR|GSK3B|HDAC1|HDAC2|HIF1A|IKBKB|IL1B|IL6|IL6ST|ITGB1|KIT|MME|OPRM1|MAP2K1|RAC1|RET|SHH|AURKA|TNF|TNFRSF1A|VEGFA|CXCR4	-16.3694	-18.317	26.5806
GO:2000116	GO Biological Processes	19	regulation of cysteine-type endopeptidase activity	-18.3	13.0075	16.0898	30169	235	227	23	10.1322	2.00281	207|330|331|834|841|1509|1612|2149|2152|2168|3717|4318|5468|5743|6714|6850|7124|7422|7498|10392|10892|23411|114548	AKT1|BIRC3|XIAP|CASP1|CASP8|CTSD|DAPK1|F2R|F3|FABP1|JAK2|MMP9|PPARG|PTGS2|SRC|SYK|TNF|VEGFA|XDH|NOD1|MALT1|SIRT1|NLRP3	-16.3549	-26.7434	15.9484
GO:0030324	GO Biological Processes	19	lung development	-18.2822	15.4197	16.9421	30169	181	227	21	9.2511	1.92311	383|1544|1636|2033|2034|2246|2247|2735|3488|3791|4311|4323|5156|5159|5241|5594|5595|5604|6469|7048|7422	ARG1|CYP1A2|ACE|EP300|EPAS1|FGF1|FGF2|GLI1|IGFBP5|KDR|MME|MMP14|PDGFRA|PDGFRB|PGR|MAPK1|MAPK3|MAP2K1|SHH|TGFBR2|VEGFA	-16.3395	-20.3322	15.4197
GO:0032757	GO Biological Processes	19	positive regulation of interleukin-8 production	-18.1079	31.6436	21.1997	30169	63	227	15	6.60793	1.64883	1991|2149|2152|3553|3569|4843|5054|5319|6774|6850|7099|7124|10392|54106|64127	ELANE|F2R|F3|IL1B|IL6|NOS2|SERPINE1|PLA2G1B|STAT3|SYK|TLR4|TNF|NOD1|TLR9|NOD2	-16.1677	-25.3768	31.6436
GO:0031329	GO Biological Processes	19	regulation of cellular catabolic process	-18.0996	6.16217	12.8683	30169	798	227	37	16.2996	2.45154	25|207|472|596|836|949|1017|1432|1612|2033|2168|2185|2475|2932|3091|3356|3417|3553|3569|3791|4170|4193|4233|5290|5347|5595|5599|5747|6469|6774|6790|7124|8517|10392|23411|54106|64127	ABL1|AKT1|ATM|BCL2|CASP3|SCARB1|CDK2|MAPK14|DAPK1|EP300|FABP1|PTK2B|MTOR|GSK3B|HIF1A|HTR2A|IDH1|IL1B|IL6|KDR|MCL1|MDM2|MET|PIK3CA|PLK1|MAPK3|MAPK8|PTK2|SHH|STAT3|AURKA|TNF|IKBKG|NOD1|SIRT1|TLR9|NOD2	-16.1619	-18.0996	12.4043
GO:0030323	GO Biological Processes	19	respiratory tube development	-18.0824	15.0863	16.7334	30169	185	227	21	9.2511	1.92311	383|1544|1636|2033|2034|2246|2247|2735|3488|3791|4311|4323|5156|5159|5241|5594|5595|5604|6469|7048|7422	ARG1|CYP1A2|ACE|EP300|EPAS1|FGF1|FGF2|GLI1|IGFBP5|KDR|MME|MMP14|PDGFRA|PDGFRB|PGR|MAPK1|MAPK3|MAP2K1|SHH|TGFBR2|VEGFA	-16.1471	-20.3322	15.4197
GO:0002703	GO Biological Processes	19	regulation of leukocyte mediated immunity	-18.0528	12.6837	15.8561	30169	241	227	23	10.1322	2.00281	136|196|383|3105|3123|3383|3553|3558|3569|3718|3815|4843|5170|6777|6778|6850|7099|7124|10892|11035|54106|64127|114548	ADORA2B|AHR|ARG1|HLA-A|HLA-DRB1|ICAM1|IL1B|IL2|IL6|JAK3|KIT|NOS2|PDPK1|STAT5B|STAT6|SYK|TLR4|TNF|MALT1|RIPK3|TLR9|NOD2|NLRP3	-16.1199	-28.2991	25.5583
GO:0045862	GO Biological Processes	19	positive regulation of proteolysis	-18.0475	9.64619	14.6102	30169	372	227	27	11.8943	2.14861	207|834|841|1509|1612|2149|2152|2185|2932|3066|3553|3717|4193|4323|5347|5468|5747|6714|6774|6790|6850|7124|7498|10392|10892|23411|114548	AKT1|CASP1|CASP8|CTSD|DAPK1|F2R|F3|PTK2B|GSK3B|HDAC2|IL1B|JAK2|MDM2|MMP14|PLK1|PPARG|PTK2|SRC|STAT3|AURKA|SYK|TNF|XDH|NOD1|MALT1|SIRT1|NLRP3	-16.117	-26.7434	15.9484
GO:0050878	GO Biological Processes	19	regulation of body fluid levels	-18.0177	9.62033	14.5863	30169	373	227	27	11.8943	2.14861	134|595|1080|1131|1432|1910|2147|2149|2152|2162|3091|3172|3569|4233|5054|5156|5290|6469|6714|6777|6850|6869|7421|7422|7494|7498|10855	ADORA1|CCND1|CFTR|CHRM3|MAPK14|EDNRB|F2|F2R|F3|F13A1|HIF1A|HNF4A|IL6|MET|SERPINE1|PDGFRA|PIK3CA|SHH|SRC|STAT5B|SYK|TACR1|VDR|VEGFA|XBP1|XDH|HPSE	-16.0896	-29.2377	11.7003
GO:0014068	GO Biological Processes	19	positive regulation of phosphatidylinositol 3-kinase signaling	-17.9628	26.5806	19.9479	30169	80	227	16	7.04846	1.69888	2147|2149|2247|2260|2321|3480|3717|3791|3815|5156|5159|5467|5747|6714|7124|23411	F2|F2R|FGF2|FGFR1|FLT1|IGF1R|JAK2|KDR|KIT|PDGFRA|PDGFRB|PPARD|PTK2|SRC|TNF|SIRT1	-16.0371	-17.9628	37.9723
GO:0002697	GO Biological Processes	19	regulation of immune effector process	-17.8407	9.46803	14.4448	30169	379	227	27	11.8943	2.14861	136|196|383|3105|3123|3383|3553|3558|3569|3718|3815|4282|4843|5170|6777|6778|6850|7099|7124|7494|10392|10892|11035|23411|54106|64127|114548	ADORA2B|AHR|ARG1|HLA-A|HLA-DRB1|ICAM1|IL1B|IL2|IL6|JAK3|KIT|MIF|NOS2|PDPK1|STAT5B|STAT6|SYK|TLR4|TNF|XBP1|NOD1|MALT1|RIPK3|SIRT1|TLR9|NOD2|NLRP3	-15.9173	-28.2991	25.5583
GO:1904951	GO Biological Processes	19	positive regulation of establishment of protein localization	-17.8209	10.718	14.975	30169	310	227	25	11.0132	2.07782	983|1080|1432|2064|2645|2932|3091|3123|3265|3320|3553|3717|5295|5319|5467|5468|5599|5743|6469|6714|7099|7124|8841|9971|51738	CDK1|CFTR|MAPK14|ERBB2|GCK|GSK3B|HIF1A|HLA-DRB1|HRAS|HSP90AA1|IL1B|JAK2|PIK3R1|PLA2G1B|PPARD|PPARG|MAPK8|PTGS2|SHH|SRC|TLR4|TNF|HDAC3|NR1H4|GHRL	-15.8999	-22.1473	26.5806
GO:0045596	GO Biological Processes	19	negative regulation of cell differentiation	-17.7921	6.47856	12.9367	30169	718	227	35	15.4185	2.39688	595|1786|1910|1956|2064|2146|2147|2185|2539|2932|3488|3553|3558|3569|3685|3688|3718|4318|5295|5467|5468|5594|5781|5915|6469|6772|6774|6777|7046|7099|7124|7422|7494|7498|23411	CCND1|DNMT1|EDNRB|EGFR|ERBB2|EZH2|F2|PTK2B|G6PD|GSK3B|IGFBP5|IL1B|IL2|IL6|ITGAV|ITGB1|JAK3|MMP9|PIK3R1|PPARD|PPARG|MAPK1|PTPN11|RARB|SHH|STAT1|STAT3|STAT5B|TGFBR1|TLR4|TNF|VEGFA|XBP1|XDH|SIRT1	-15.8734	-17.7921	6.47856
GO:0007249	GO Biological Processes	19	I-kappaB kinase/NF-kappaB signaling	-17.7746	30.2052	20.6811	30169	66	227	15	6.60793	1.64883	25|207|330|1147|1909|1910|3551|3553|7099|7124|8517|10392|11035|54106|64127	ABL1|AKT1|BIRC3|CHUK|EDNRA|EDNRB|IKBKB|IL1B|TLR4|TNF|IKBKG|NOD1|RIPK3|TLR9|NOD2	-15.8606	-25.3768	31.6436
GO:0010517	GO Biological Processes	19	regulation of phospholipase activity	-17.7746	30.2052	20.6811	30169	66	227	15	6.60793	1.64883	25|185|1909|1956|2099|2247|2260|2321|3265|3356|3815|5156|5159|5170|5319	ABL1|AGTR1|EDNRA|EGFR|ESR1|FGF2|FGFR1|FLT1|HRAS|HTR2A|KIT|PDGFRA|PDGFRB|PDPK1|PLA2G1B	-15.8606	-17.9628	37.9723
GO:0050870	GO Biological Processes	19	positive regulation of T cell activation	-17.6557	12.1784	15.4844	30169	251	227	23	10.1322	2.00281	25|207|1803|3105|3123|3553|3558|3569|3572|3717|3718|5290|5781|6469|6714|6777|6850|7048|7412|7494|10892|64127|114548	ABL1|AKT1|DPP4|HLA-A|HLA-DRB1|IL1B|IL2|IL6|IL6ST|JAK2|JAK3|PIK3CA|PTPN11|SHH|SRC|STAT5B|SYK|TGFBR2|VCAM1|XBP1|MALT1|NOD2|NLRP3	-15.744	-28.2991	25.5583
GO:0022612	GO Biological Processes	19	gland morphogenesis	-17.5511	21.9355	18.5314	30169	103	227	17	7.48899	1.74701	367|383|596|1956|2099|2908|3488|3569|4313|4790|5241|6469|6714|6778|7048|7124|7421	AR|ARG1|BCL2|EGFR|ESR1|NR3C1|IGFBP5|IL6|MMP2|NFKB1|PGR|SHH|SRC|STAT6|TGFBR2|TNF|VDR	-15.6417	-20.0724	75.9446
GO:0030522	GO Biological Processes	19	intracellular receptor signaling pathway	-17.5381	17.2956	17.1856	30169	146	227	19	8.37004	1.8381	196|367|2099|2100|2908|3172|3717|5241|5467|5468|5915|6097|6714|6774|7099|7421|8856|9971|64127	AHR|AR|ESR1|ESR2|NR3C1|HNF4A|JAK2|PGR|PPARD|PPARG|RARB|RORC|SRC|STAT3|TLR4|VDR|NR1I2|NR1H4|NOD2	-15.631	-20.0724	75.9446
GO:0007584	GO Biological Processes	19	response to nutrient	-17.4809	17.1779	17.1202	30169	147	227	19	8.37004	1.8381	249|383|595|1543|1545|2475|3480|5467|5468|5743|6198|6772|7048|7298|7412|7421|7494|9971|64127	ALPL|ARG1|CCND1|CYP1A1|CYP1B1|MTOR|IGF1R|PPARD|PPARG|PTGS2|RPS6KB1|STAT1|TGFBR2|TYMS|VCAM1|VDR|XBP1|NR1H4|NOD2	-15.576	-21.9652	17.1779
GO:0019932	GO Biological Processes	19	second-messenger-mediated signaling	-17.3867	12.824	15.6043	30169	228	227	22	9.69163	1.96358	136|185|196|1131|1234|1910|2475|2833|3576|3577|3579|3791|4842|4843|5170|6548|6850|7124|7412|7852|10803|57007	ADORA2B|AGTR1|AHR|CHRM3|CCR5|EDNRB|MTOR|CXCR3|CXCL8|CXCR1|CXCR2|KDR|NOS1|NOS2|PDPK1|SLC9A1|SYK|TNF|VCAM1|CXCR4|CCR9|ACKR3	-15.4844	-17.3867	29.534
GO:0010518	GO Biological Processes	19	positive regulation of phospholipase activity	-17.3848	33.8299	21.2184	30169	55	227	14	6.1674	1.59667	185|1909|1956|2099|2247|2260|2321|3265|3356|3815|5156|5159|5170|5319	AGTR1|EDNRA|EGFR|ESR1|FGF2|FGFR1|FLT1|HRAS|HTR2A|KIT|PDGFRA|PDGFRB|PDPK1|PLA2G1B	-15.4844	-17.9628	37.9723
GO:0032946	GO Biological Processes	19	positive regulation of mononuclear cell proliferation	-17.3677	16.9474	16.9911	30169	149	227	19	8.37004	1.8381	596|598|3105|3553|3558|3569|3572|3717|3718|4282|6469|6480|6777|6850|6869|7048|7099|7412|54106	BCL2|BCL2L1|HLA-A|IL1B|IL2|IL6|IL6ST|JAK2|JAK3|MIF|SHH|ST6GAL1|STAT5B|SYK|TACR1|TGFBR2|TLR4|VCAM1|TLR9	-15.4718	-28.2991	25.5583
GO:2000377	GO Biological Processes	19	regulation of reactive oxygen species metabolic process	-17.3677	16.9474	16.9911	30169	149	227	19	8.37004	1.8381	185|240|596|1432|1545|2147|2185|2539|2950|3091|4314|5159|5879|6850|7048|7099|7124|7498|11035	AGTR1|ALOX5|BCL2|MAPK14|CYP1B1|F2|PTK2B|G6PD|GSTP1|HIF1A|MMP3|PDGFRB|RAC1|SYK|TGFBR2|TLR4|TNF|XDH|RIPK3	-15.4718	-17.3677	22.4625
GO:0010038	GO Biological Processes	19	response to metal ion	-17.3351	9.59856	14.2905	30169	360	227	26	11.4537	2.11371	142|207|383|595|596|673|836|841|983|1147|1543|1544|1956|2185|2539|3091|3815|4318|5594|5595|5599|5743|6469|7015|7412|54106	PARP1|AKT1|ARG1|CCND1|BCL2|BRAF|CASP3|CASP8|CDK1|CHUK|CYP1A1|CYP1A2|EGFR|PTK2B|G6PD|HIF1A|KIT|MMP9|MAPK1|MAPK3|MAPK8|PTGS2|SHH|TERT|VCAM1|TLR9	-15.4414	-17.3351	28.7358
GO:0002699	GO Biological Processes	19	positive regulation of immune effector process	-17.276	11.7118	15.1333	30169	261	227	23	10.1322	2.00281	136|383|3105|3123|3553|3558|3569|3815|4282|4843|5170|6777|6778|6850|7099|7124|7494|10392|10892|23411|54106|64127|114548	ADORA2B|ARG1|HLA-A|HLA-DRB1|IL1B|IL2|IL6|KIT|MIF|NOS2|PDPK1|STAT5B|STAT6|SYK|TLR4|TNF|XBP1|NOD1|MALT1|SIRT1|TLR9|NOD2|NLRP3	-15.3845	-28.2991	25.5583
GO:0030855	GO Biological Processes	19	epithelial cell differentiation	-17.2451	7.00642	13.0163	30169	607	227	32	14.0969	2.30969	25|207|367|836|983|1508|1543|1909|1910|2034|2099|2146|2247|2735|3065|3066|3091|3172|3383|3572|3791|4233|5170|5241|5468|5604|5915|6714|7298|7422|7852|10855	ABL1|AKT1|AR|CASP3|CDK1|CTSB|CYP1A1|EDNRA|EDNRB|EPAS1|ESR1|EZH2|FGF2|GLI1|HDAC1|HDAC2|HIF1A|HNF4A|ICAM1|IL6ST|KDR|MET|PDPK1|PGR|PPARG|MAP2K1|RARB|SRC|TYMS|VEGFA|CXCR4|HPSE	-15.3557	-17.2451	37.9723
GO:0048729	GO Biological Processes	19	tissue morphogenesis	-17.1966	7.29203	13.1458	30169	565	227	31	13.6564	2.27914	25|367|596|768|836|1909|1956|2099|2246|2247|2908|3091|3488|3579|3688|3791|4193|4233|4313|4323|4638|5241|5979|6469|6714|7046|7048|7421|7422|7852|8399	ABL1|AR|BCL2|CA9|CASP3|EDNRA|EGFR|ESR1|FGF1|FGF2|NR3C1|HIF1A|IGFBP5|CXCR2|ITGB1|KDR|MDM2|MET|MMP2|MMP14|MYLK|PGR|RET|SHH|SRC|TGFBR1|TGFBR2|VDR|VEGFA|CXCR4|PLA2G10	-15.3095	-17.1966	14.5514
GO:0060541	GO Biological Processes	19	respiratory system development	-17.1514	13.6145	15.7794	30169	205	227	21	9.2511	1.92311	383|1544|1636|2033|2034|2246|2247|2735|3488|3791|4311|4323|5156|5159|5241|5594|5595|5604|6469|7048|7422	ARG1|CYP1A2|ACE|EP300|EPAS1|FGF1|FGF2|GLI1|IGFBP5|KDR|MME|MMP14|PDGFRA|PDGFRB|PGR|MAPK1|MAPK3|MAP2K1|SHH|TGFBR2|VEGFA	-15.2665	-20.3322	15.4197
GO:0048565	GO Biological Processes	19	digestive tract development	-17.1338	18.402	17.313	30169	130	227	18	7.92952	1.79337	596|887|1543|1910|1956|2735|3091|3572|3576|3815|5156|5915|5979|6469|6714|7048|7124|7298	BCL2|CCKBR|CYP1A1|EDNRB|EGFR|GLI1|HIF1A|IL6ST|CXCL8|KIT|PDGFRA|RARB|RET|SHH|SRC|TGFBR2|TNF|TYMS	-15.251	-17.1338	20.1368
GO:0034612	GO Biological Processes	19	response to tumor necrosis factor	-17.1076	13.5484	15.7353	30169	206	227	21	9.2511	1.92311	207|330|836|841|1147|1432|1545|2185|3551|3576|3717|4790|5594|5595|5743|6198|6772|7124|7132|7412|23411	AKT1|BIRC3|CASP3|CASP8|CHUK|MAPK14|CYP1B1|PTK2B|IKBKB|CXCL8|JAK2|NFKB1|MAPK1|MAPK3|PTGS2|RPS6KB1|STAT1|TNF|TNFRSF1A|VCAM1|SIRT1	-15.2269	-33.8084	18.6531
GO:0034762	GO Biological Processes	19	regulation of transmembrane transport	-17.0194	6.88171	12.8635	30169	618	227	32	14.0969	2.30969	25|207|383|596|623|673|1080|1131|1394|1432|1612|1636|1909|2147|2149|2185|2539|3553|3688|4318|4842|4988|5170|5243|5295|5319|5781|6198|6548|7015|7124|54106	ABL1|AKT1|ARG1|BCL2|BDKRB1|BRAF|CFTR|CHRM3|CRHR1|MAPK14|DAPK1|ACE|EDNRA|F2|F2R|PTK2B|G6PD|IL1B|ITGB1|MMP9|NOS1|OPRM1|PDPK1|ABCB1|PIK3R1|PLA2G1B|PTPN11|RPS6KB1|SLC9A1|TERT|TNF|TLR9	-15.1409	-19.6206	16.2077
GO:0014066	GO Biological Processes	19	regulation of phosphatidylinositol 3-kinase signaling	-16.9756	20.3545	17.7873	30169	111	227	17	7.48899	1.74701	1956|2147|2149|2247|2260|2321|3480|3717|3791|3815|5156|5159|5467|5747|6714|7124|23411	EGFR|F2|F2R|FGF2|FGFR1|FLT1|IGF1R|JAK2|KDR|KIT|PDGFRA|PDGFRB|PPARD|PTK2|SRC|TNF|SIRT1	-15.0992	-17.9628	37.9723
GO:0001936	GO Biological Processes	19	regulation of endothelial cell proliferation	-16.9123	14.5249	15.9789	30169	183	227	20	8.81057	1.88131	185|207|240|383|2152|2247|2260|2321|3091|3791|5170|5468|6772|6774|7046|7124|7422|7498|23411|51738	AGTR1|AKT1|ALOX5|ARG1|F3|FGF2|FGFR1|FLT1|HIF1A|KDR|PDPK1|PPARG|STAT1|STAT3|TGFBR1|TNF|VEGFA|XDH|SIRT1|GHRL	-15.038	-27.9533	17.7204
GO:0002009	GO Biological Processes	19	morphogenesis of an epithelium	-16.8776	8.21476	13.4717	30169	453	227	28	12.3348	2.18256	25|367|596|768|836|1909|1956|2099|2246|2247|2908|3091|3488|3579|3688|3791|4233|4313|4323|5241|5979|6469|6714|7048|7421|7422|7852|8399	ABL1|AR|BCL2|CA9|CASP3|EDNRA|EGFR|ESR1|FGF1|FGF2|NR3C1|HIF1A|IGFBP5|CXCR2|ITGB1|KDR|MET|MMP2|MMP14|PGR|RET|SHH|SRC|TGFBR2|VDR|VEGFA|CXCR4|PLA2G10	-15.0068	-17.1966	14.5514
GO:0031348	GO Biological Processes	19	negative regulation of defense response	-16.8769	11.2381	14.7685	30169	272	227	23	10.1322	2.00281	134|142|240|383|1269|1432|1991|2950|3105|3123|3558|4790|5467|5468|5734|6714|6850|7132|8399|9971|51738|64127|114548	ADORA1|PARP1|ALOX5|ARG1|CNR2|MAPK14|ELANE|GSTP1|HLA-A|HLA-DRB1|IL2|NFKB1|PPARD|PPARG|PTGER4|SRC|SYK|TNFRSF1A|PLA2G10|NR1H4|GHRL|NOD2|NLRP3	-15.0068	-20.526	14.446
GO:0050728	GO Biological Processes	19	negative regulation of inflammatory response	-16.8652	14.446	15.9293	30169	184	227	20	8.81057	1.88131	134|240|1269|1432|1991|2950|3123|3558|4790|5467|5468|5734|6714|6850|7132|8399|9971|51738|64127|114548	ADORA1|ALOX5|CNR2|MAPK14|ELANE|GSTP1|HLA-DRB1|IL2|NFKB1|PPARD|PPARG|PTGER4|SRC|SYK|TNFRSF1A|PLA2G10|NR1H4|GHRL|NOD2|NLRP3	-14.9972	-20.526	14.446
GO:0010720	GO Biological Processes	19	positive regulation of cell development	-16.8098	10.3898	14.3983	30169	307	227	24	10.5727	2.04087	25|596|673|1636|2247|2475|3065|3066|3091|3553|3569|3572|3688|3815|4311|4988|5604|5879|5979|6469|6790|7124|7422|7852	ABL1|BCL2|BRAF|ACE|FGF2|MTOR|HDAC1|HDAC2|HIF1A|IL1B|IL6|IL6ST|ITGB1|KIT|MME|OPRM1|MAP2K1|RAC1|RET|SHH|AURKA|TNF|VEGFA|CXCR4	-14.9439	-18.317	26.5806
GO:0032868	GO Biological Processes	19	response to insulin	-16.7652	13.0419	15.3926	30169	214	227	21	9.2511	1.92311	142|207|249|1019|1432|2475|2645|2932|3480|5170|5290|5295|5315|5319|5468|6198|6548|6714|6772|7494|23411	PARP1|AKT1|ALPL|CDK4|MAPK14|MTOR|GCK|GSK3B|IGF1R|PDPK1|PIK3CA|PIK3R1|PKM|PLA2G1B|PPARG|RPS6KB1|SLC9A1|SRC|STAT1|XBP1|SIRT1	-14.9013	-55.0431	17.0954
GO:0008585	GO Biological Processes	19	female gonad development	-16.6185	22.1505	18.0723	30169	96	227	16	7.04846	1.69888	472|596|598|836|2099|3417|3791|3815|4313|4323|5156|5241|6714|6777|7422|23411	ATM|BCL2|BCL2L1|CASP3|ESR1|IDH1|KDR|KIT|MMP2|MMP14|PDGFRA|PGR|SRC|STAT5B|VEGFA|SIRT1	-14.7566	-20.0267	24.6117
GO:0043523	GO Biological Processes	19	regulation of neuron apoptotic process	-16.5994	12.8026	15.2281	30169	218	227	21	9.2511	1.92311	25|142|472|595|596|598|673|836|2149|2185|2539|2908|3091|3265|3572|3717|3791|4170|5290|7015|7124	ABL1|PARP1|ATM|CCND1|BCL2|BCL2L1|BRAF|CASP3|F2R|PTK2B|G6PD|NR3C1|HIF1A|HRAS|IL6ST|JAK2|KDR|MCL1|PIK3CA|TERT|TNF	-14.7396	-20.7071	12.8026
GO:0031960	GO Biological Processes	19	response to corticosteroid	-16.5193	15.304	16.0419	30169	165	227	19	8.37004	1.8381	142|249|383|595|596|836|1545|1636|2908|3480|3569|3717|5290|5743|6198|6446|6714|7124|7298	PARP1|ALPL|ARG1|CCND1|BCL2|CASP3|CYP1B1|ACE|NR3C1|IGF1R|IL6|JAK2|PIK3CA|PTGS2|RPS6KB1|SGK1|SRC|TNF|TYMS	-14.6616	-21.1405	24.7262
GO:0055123	GO Biological Processes	19	digestive system development	-16.4867	16.9664	16.5462	30169	141	227	18	7.92952	1.79337	596|887|1543|1910|1956|2735|3091|3572|3576|3815|5156|5915|5979|6469|6714|7048|7124|7298	BCL2|CCKBR|CYP1A1|EDNRB|EGFR|GLI1|HIF1A|IL6ST|CXCL8|KIT|PDGFRA|RARB|RET|SHH|SRC|TGFBR2|TNF|TYMS	-14.6309	-17.1338	20.1368
GO:0010631	GO Biological Processes	19	epithelial cell migration	-16.3948	21.4793	17.771	30169	99	227	16	7.04846	1.69888	25|207|949|1545|1803|2185|2247|3688|3791|3815|3964|5290|5467|5781|7046|7422	ABL1|AKT1|SCARB1|CYP1B1|DPP4|PTK2B|FGF2|ITGB1|KDR|KIT|LGALS8|PIK3CA|PPARD|PTPN11|TGFBR1|VEGFA	-14.5431	-18.7692	49.8387
GO:2001237	GO Biological Processes	19	negative regulation of extrinsic apoptotic signaling pathway	-16.3948	21.4793	17.771	30169	99	227	16	7.04846	1.69888	207|367|596|598|2932|2950|3383|3553|3685|4170|5054|6198|6714|7015|7046|7124	AKT1|AR|BCL2|BCL2L1|GSK3B|GSTP1|ICAM1|IL1B|ITGAV|MCL1|SERPINE1|RPS6KB1|SRC|TERT|TGFBR1|TNF	-14.5431	-25.2515	21.4793
GO:0046545	GO Biological Processes	19	development of primary female sexual characteristics	-16.322	21.2645	17.6735	30169	100	227	16	7.04846	1.69888	472|596|598|836|2099|3417|3791|3815|4313|4323|5156|5241|6714|6777|7422|23411	ATM|BCL2|BCL2L1|CASP3|ESR1|IDH1|KDR|KIT|MMP2|MMP14|PDGFRA|PGR|SRC|STAT5B|VEGFA|SIRT1	-14.475	-20.0267	24.6117
GO:0007568	GO Biological Processes	19	aging	-16.3216	14.9418	15.8251	30169	169	227	19	8.37004	1.8381	249|383|1543|1636|1909|1910|2247|3356|3480|3488|4311|4313|4353|5159|5743|6198|7048|7298|7412	ALPL|ARG1|CYP1A1|ACE|EDNRA|EDNRB|FGF2|HTR2A|IGF1R|IGFBP5|MME|MMP2|MPO|PDGFRB|PTGS2|RPS6KB1|TGFBR2|TYMS|VCAM1	-14.475	-21.9652	17.1779
GO:0050921	GO Biological Processes	19	positive regulation of chemotaxis	-16.32	16.6129	16.3519	30169	144	227	18	7.92952	1.79337	2152|2185|2247|2260|3569|3576|3579|3791|4233|5054|5159|5594|5595|5747|5879|7422|7852|7941	F3|PTK2B|FGF2|FGFR1|IL6|CXCL8|CXCR2|KDR|MET|SERPINE1|PDGFRB|MAPK1|MAPK3|PTK2|RAC1|VEGFA|CXCR4|PLA2G7	-14.475	-23.5059	20.0608
GO:0032355	GO Biological Processes	19	response to estradiol	-16.3188	18.6723	16.96	30169	121	227	17	7.48899	1.74701	595|836|841|890|1545|1956|2099|2100|2146|3248|3480|4313|5159|5743|6774|6777|6869	CCND1|CASP3|CASP8|CCNA2|CYP1B1|EGFR|ESR1|ESR2|EZH2|HPGD|IGF1R|MMP2|PDGFRB|PTGS2|STAT3|STAT5B|TACR1	-14.475	-16.3188	19.9355
GO:0002831	GO Biological Processes	19	regulation of response to biotic stimulus	-16.2489	9.20381	13.6537	30169	361	227	25	11.0132	2.07782	142|196|330|331|383|841|1612|2033|3105|3123|3320|3551|3553|4282|5468|5595|5781|6714|6772|6777|6850|7099|10392|54106|64127	PARP1|AHR|BIRC3|XIAP|ARG1|CASP8|DAPK1|EP300|HLA-A|HLA-DRB1|HSP90AA1|IKBKB|IL1B|MIF|PPARG|MAPK3|PTPN11|SRC|STAT1|STAT5B|SYK|TLR4|NOD1|TLR9|NOD2	-14.4071	-16.2489	24.1642
GO:0009615	GO Biological Processes	19	response to virus	-16.2207	9.17839	13.6304	30169	362	227	25	11.0132	2.07782	596|598|834|1147|1432|1543|3091|3320|3551|3569|3716|3717|3964|4790|4953|5551|6714|6772|7124|7852|8399|8517|11035|54106|114548	BCL2|BCL2L1|CASP1|CHUK|MAPK14|CYP1A1|HIF1A|HSP90AA1|IKBKB|IL6|JAK1|JAK2|LGALS8|NFKB1|ODC1|PRF1|SRC|STAT1|TNF|CXCR4|PLA2G10|IKBKG|RIPK3|TLR9|NLRP3	-14.3808	-16.2207	14.1386
GO:0010632	GO Biological Processes	19	regulation of epithelial cell migration	-16.1957	10.4684	14.1561	30169	292	227	23	10.1322	2.00281	25|207|949|2185|2246|2247|2260|2475|3091|3791|4233|4318|5170|5468|5743|5747|5879|6714|6869|7048|7124|7422|23411	ABL1|AKT1|SCARB1|PTK2B|FGF1|FGF2|FGFR1|MTOR|HIF1A|KDR|MET|MMP9|PDPK1|PPARG|PTGS2|PTK2|RAC1|SRC|TACR1|TGFBR2|TNF|VEGFA|SIRT1	-14.3578	-27.9533	17.7204
GO:0090132	GO Biological Processes	19	epithelium migration	-16.1787	20.8475	17.4827	30169	102	227	16	7.04846	1.69888	25|207|949|1545|1803|2185|2247|3688|3791|3815|3964|5290|5467|5781|7046|7422	ABL1|AKT1|SCARB1|CYP1B1|DPP4|PTK2B|FGF2|ITGB1|KDR|KIT|LGALS8|PIK3CA|PPARD|PTPN11|TGFBR1|VEGFA	-14.3427	-18.7692	49.8387
GO:1903034	GO Biological Processes	19	regulation of response to wounding	-16.1767	14.6812	15.6673	30169	172	227	19	8.37004	1.8381	240|673|2147|2149|2152|2247|2475|3265|3480|3688|4638|5054|5156|5604|5747|7124|7494|7852|10855	ALOX5|BRAF|F2|F2R|F3|FGF2|MTOR|HRAS|IGF1R|ITGB1|MYLK|SERPINE1|PDGFRA|MAP2K1|PTK2|TNF|XBP1|CXCR4|HPSE	-14.3427	-16.1767	25.7232
GO:0030099	GO Biological Processes	19	myeloid cell differentiation	-16.1654	11.2456	14.4468	30169	260	227	22	9.69163	1.96358	142|836|841|1432|2033|2034|2539|3123|3717|3718|3815|4318|5295|5468|5781|6714|6777|7048|7124|7422|8399|23411	PARP1|CASP3|CASP8|MAPK14|EP300|EPAS1|G6PD|HLA-DRB1|JAK2|JAK3|KIT|MMP9|PIK3R1|PPARG|PTPN11|SRC|STAT5B|TGFBR2|TNF|VEGFA|PLA2G10|SIRT1	-14.3332	-16.1654	26.5806
GO:0035296	GO Biological Processes	19	regulation of tube diameter	-16.1571	16.2738	16.1634	30169	147	227	18	7.92952	1.79337	25|134|136|185|624|1131|1636|1909|1910|2149|3274|3356|4313|4842|5467|5743|6869|7124	ABL1|ADORA1|ADORA2B|AGTR1|BDKRB2|CHRM3|ACE|EDNRA|EDNRB|F2R|HRH2|HTR2A|MMP2|NOS1|PPARD|PTGS2|TACR1|TNF	-14.3288	-26.7148	28.1916
GO:0097746	GO Biological Processes	19	blood vessel diameter maintenance	-16.1571	16.2738	16.1634	30169	147	227	18	7.92952	1.79337	25|134|136|185|624|1131|1636|1909|1910|2149|3274|3356|4313|4842|5467|5743|6869|7124	ABL1|ADORA1|ADORA2B|AGTR1|BDKRB2|CHRM3|ACE|EDNRA|EDNRB|F2R|HRH2|HTR2A|MMP2|NOS1|PPARD|PTGS2|TACR1|TNF	-14.3288	-26.7148	28.1916
GO:0045927	GO Biological Processes	19	positive regulation of growth	-16.13	11.2026	14.4139	30169	261	227	22	9.69163	1.96358	207|596|983|1432|1956|2064|2147|2185|2247|2475|2735|3558|4323|5467|6198|6548|6777|7046|7048|7422|7852|51738	AKT1|BCL2|CDK1|MAPK14|EGFR|ERBB2|F2|PTK2B|FGF2|MTOR|GLI1|IL2|MMP14|PPARD|RPS6KB1|SLC9A1|STAT5B|TGFBR1|TGFBR2|VEGFA|CXCR4|GHRL	-14.3035	-25.7734	11.2026
GO:0002687	GO Biological Processes	19	positive regulation of leukocyte migration	-16.1037	16.1639	16.1018	30169	148	227	18	7.92952	1.79337	25|623|2185|3383|3569|3576|3579|4323|5054|5295|5594|5595|5747|5879|6869|7124|7422|7941	ABL1|BDKRB1|PTK2B|ICAM1|IL6|CXCL8|CXCR2|MMP14|SERPINE1|PIK3R1|MAPK1|MAPK3|PTK2|RAC1|TACR1|TNF|VEGFA|PLA2G7	-14.281	-23.5059	20.0608
GO:0035150	GO Biological Processes	19	regulation of tube size	-16.1037	16.1639	16.1018	30169	148	227	18	7.92952	1.79337	25|134|136|185|624|1131|1636|1909|1910|2149|3274|3356|4313|4842|5467|5743|6869|7124	ABL1|ADORA1|ADORA2B|AGTR1|BDKRB2|CHRM3|ACE|EDNRA|EDNRB|F2R|HRH2|HTR2A|MMP2|NOS1|PPARD|PTGS2|TACR1|TNF	-14.281	-26.7148	28.1916
GO:0042110	GO Biological Processes	19	T cell activation	-16.0016	10.2576	13.9839	30169	298	227	23	10.1322	2.00281	25|596|673|841|1803|2064|2475|3105|3383|3558|3569|3815|5295|5734|6097|6469|6774|6777|6778|6850|10803|10892|11035	ABL1|BCL2|BRAF|CASP8|DPP4|ERBB2|MTOR|HLA-A|ICAM1|IL2|IL6|KIT|PIK3R1|PTGER4|RORC|SHH|STAT3|STAT5B|STAT6|SYK|CCR9|MALT1|RIPK3	-14.1808	-37.9073	15.4538
GO:0060193	GO Biological Processes	19	positive regulation of lipase activity	-15.9702	27.3624	18.9494	30169	68	227	14	6.1674	1.59667	185|1909|1956|2099|2247|2260|2321|3265|3356|3815|5156|5159|5170|5319	AGTR1|EDNRA|EGFR|ESR1|FGF2|FGFR1|FLT1|HRAS|HTR2A|KIT|PDGFRA|PDGFRB|PDPK1|PLA2G1B	-14.1513	-17.9628	37.9723
GO:0050730	GO Biological Processes	19	regulation of peptidyl-tyrosine phosphorylation	-15.9553	10.992	14.2522	30169	266	227	22	9.69163	1.96358	25|134|1636|1956|2185|2475|3066|3356|3558|3569|3572|3717|3815|4282|5781|6714|6850|7124|7132|7422|51738|64127	ABL1|ADORA1|ACE|EGFR|PTK2B|MTOR|HDAC2|HTR2A|IL2|IL6|IL6ST|JAK2|KIT|MIF|PTPN11|SRC|SYK|TNF|TNFRSF1A|VEGFA|GHRL|NOD2	-14.1381	-18.9652	56.9585
GO:0045471	GO Biological Processes	19	response to ethanol	-15.8943	17.6512	16.4376	30169	128	227	17	7.48899	1.74701	595|841|983|1394|2185|2539|3066|3248|3480|3558|4988|6198|6480|6869|7124|7298|7412	CCND1|CASP8|CDK1|CRHR1|PTK2B|G6PD|HDAC2|HPGD|IGF1R|IL2|OPRM1|RPS6KB1|ST6GAL1|TACR1|TNF|TYMS|VCAM1	-14.0804	-26.3466	17.6512
GO:0062013	GO Biological Processes	19	positive regulation of small molecule metabolic process	-15.8938	15.7385	15.8613	30169	152	227	18	7.92952	1.79337	136|207|2168|2246|2475|2645|3091|3356|3553|4842|4843|5467|5468|5743|6714|7124|9971|23411	ADORA2B|AKT1|FABP1|FGF1|MTOR|GCK|HIF1A|HTR2A|IL1B|NOS1|NOS2|PPARD|PPARG|PTGS2|SRC|TNF|NR1H4|SIRT1	-14.0804	-25.7798	20.7122
GO:0002764	GO Biological Processes	19	immune response-regulating signaling pathway	-15.8885	8.8839	13.3583	30169	374	227	25	11.0132	2.07782	25|596|673|834|2033|3105|3123|3265|3551|3815|5290|5594|5599|5747|6714|6850|7099|7124|8517|9971|10392|10892|54106|64127|114548	ABL1|BCL2|BRAF|CASP1|EP300|HLA-A|HLA-DRB1|HRAS|IKBKB|KIT|PIK3CA|MAPK1|MAPK8|PTK2|SRC|SYK|TLR4|TNF|IKBKG|NR1H4|NOD1|MALT1|TLR9|NOD2|NLRP3	-14.0769	-18.9163	12.3058
GO:0051341	GO Biological Processes	19	regulation of oxidoreductase activity	-15.7672	19.6893	16.9414	30169	108	227	16	7.04846	1.69888	25|185|207|949|1269|1956|2185|3091|3553|4790|7015|7124|7421|10392|11035|64127	ABL1|AGTR1|AKT1|SCARB1|CNR2|EGFR|PTK2B|HIF1A|IL1B|NFKB1|TERT|TNF|VDR|NOD1|RIPK3|NOD2	-13.9593	-15.7672	42.2873
GO:0090130	GO Biological Processes	19	tissue migration	-15.7672	19.6893	16.9414	30169	108	227	16	7.04846	1.69888	25|207|949|1545|1803|2185|2247|3688|3791|3815|3964|5290|5467|5781|7046|7422	ABL1|AKT1|SCARB1|CYP1B1|DPP4|PTK2B|FGF2|ITGB1|KDR|KIT|LGALS8|PIK3CA|PPARD|PTPN11|TGFBR1|VEGFA	-13.9593	-18.7692	49.8387
GO:0052547	GO Biological Processes	19	regulation of peptidase activity	-15.7468	7.81783	12.8158	30169	459	227	27	11.8943	2.14861	207|330|331|834|841|1508|1509|1612|2149|2152|2168|3065|3717|4318|5054|5468|5743|6714|6774|6850|7124|7422|7498|10392|10892|23411|114548	AKT1|BIRC3|XIAP|CASP1|CASP8|CTSB|CTSD|DAPK1|F2R|F3|FABP1|HDAC1|JAK2|MMP9|SERPINE1|PPARG|PTGS2|SRC|STAT3|SYK|TNF|VEGFA|XDH|NOD1|MALT1|SIRT1|NLRP3	-13.9406	-26.7434	15.9484
GO:0019722	GO Biological Processes	19	calcium-mediated signaling	-15.7405	15.4339	15.6868	30169	155	227	18	7.92952	1.79337	185|1131|1234|1910|2475|2833|3576|3577|3579|3791|5170|6548|6850|7124|7412|7852|10803|57007	AGTR1|CHRM3|CCR5|EDNRB|MTOR|CXCR3|CXCL8|CXCR1|CXCR2|KDR|PDPK1|SLC9A1|SYK|TNF|VCAM1|CXCR4|CCR9|ACKR3	-13.9379	-17.3867	29.534
GO:2001236	GO Biological Processes	19	regulation of extrinsic apoptotic signaling pathway	-15.7405	15.4339	15.6868	30169	155	227	18	7.92952	1.79337	207|367|596|598|2260|2932|2950|3383|3553|3685|4170|5054|5979|6198|6714|7015|7046|7124	AKT1|AR|BCL2|BCL2L1|FGFR1|GSK3B|GSTP1|ICAM1|IL1B|ITGAV|MCL1|SERPINE1|RET|RPS6KB1|SRC|TERT|TGFBR1|TNF	-13.9379	-25.2515	21.4793
GO:0070371	GO Biological Processes	19	ERK1 and ERK2 cascade	-15.7157	31.4135	19.6566	30169	55	227	13	5.72687	1.5422	25|673|983|2247|3685|3791|5594|5595|5604|5734|7099|10392|64127	ABL1|BRAF|CDK1|FGF2|ITGAV|KDR|MAPK1|MAPK3|MAP2K1|PTGER4|TLR4|NOD1|NOD2	-13.915	-25.5879	31.4135
GO:0001558	GO Biological Processes	19	regulation of cell growth	-15.6555	8.18834	12.9482	30169	422	227	26	11.4537	2.11371	25|185|207|596|623|1956|2064|2100|2147|2185|2475|2539|2932|3172|3486|3487|3488|3558|4323|5467|6446|6548|7046|7422|7852|23411	ABL1|AGTR1|AKT1|BCL2|BDKRB1|EGFR|ERBB2|ESR2|F2|PTK2B|MTOR|G6PD|GSK3B|HNF4A|IGFBP3|IGFBP4|IGFBP5|IL2|MMP14|PPARD|SGK1|SLC9A1|TGFBR1|VEGFA|CXCR4|SIRT1	-13.8565	-25.7734	11.2026
GO:1900274	GO Biological Processes	19	regulation of phospholipase C activity	-15.6523	37.9723	20.877	30169	42	227	12	5.28634	1.48515	25|1909|1956|2099|2247|2260|2321|3265|3356|3815|5156|5159	ABL1|EDNRA|EGFR|ESR1|FGF2|FGFR1|FLT1|HRAS|HTR2A|KIT|PDGFRA|PDGFRB	-13.855	-17.9628	37.9723
GO:0060191	GO Biological Processes	19	regulation of lipase activity	-15.6114	22.1505	17.4967	30169	90	227	15	6.60793	1.64883	25|185|1909|1956|2099|2247|2260|2321|3265|3356|3815|5156|5159|5170|5319	ABL1|AGTR1|EDNRA|EGFR|ESR1|FGF2|FGFR1|FLT1|HRAS|HTR2A|KIT|PDGFRA|PDGFRB|PDPK1|PLA2G1B	-13.816	-17.9628	37.9723
GO:0052548	GO Biological Processes	19	regulation of endopeptidase activity	-15.5081	8.07355	12.833	30169	428	227	26	11.4537	2.11371	207|330|331|834|841|1509|1612|2149|2152|2168|3065|3717|4318|5054|5468|5743|6714|6774|6850|7124|7422|7498|10392|10892|23411|114548	AKT1|BIRC3|XIAP|CASP1|CASP8|CTSD|DAPK1|F2R|F3|FABP1|HDAC1|JAK2|MMP9|SERPINE1|PPARG|PTGS2|SRC|STAT3|SYK|TNF|VEGFA|XDH|NOD1|MALT1|SIRT1|NLRP3	-13.7144	-26.7434	15.9484
GO:0002700	GO Biological Processes	19	regulation of production of molecular mediator of immune response	-15.4925	13.5035	14.9337	30169	187	227	19	8.37004	1.8381	383|3105|3553|3558|3569|3718|3815|4282|6778|6850|7099|7124|7494|10392|10892|23411|54106|64127|114548	ARG1|HLA-A|IL1B|IL2|IL6|JAK3|KIT|MIF|STAT6|SYK|TLR4|TNF|XBP1|NOD1|MALT1|SIRT1|TLR9|NOD2|NLRP3	-13.7005	-28.2991	25.5583
GO:0051896	GO Biological Processes	19	regulation of protein kinase B signaling	-15.4059	13.3606	14.8423	30169	189	227	19	8.37004	1.8381	1956|2152|2247|2260|2475|3320|3480|3488|3688|4233|5290|5747|5979|6714|7046|7124|7498|10855|23411	EGFR|F3|FGF2|FGFR1|MTOR|HSP90AA1|IGF1R|IGFBP5|ITGB1|MET|PIK3CA|PTK2|RET|SRC|TGFBR1|TNF|XDH|HPSE|SIRT1	-13.6157	-15.4059	17.7204
GO:0046660	GO Biological Processes	19	female sex differentiation	-15.3185	18.4909	16.3627	30169	115	227	16	7.04846	1.69888	472|596|598|836|2099|3417|3791|3815|4313|4323|5156|5241|6714|6777|7422|23411	ATM|BCL2|BCL2L1|CASP3|ESR1|IDH1|KDR|KIT|MMP2|MMP14|PDGFRA|PGR|SRC|STAT5B|VEGFA|SIRT1	-13.53	-20.0267	24.6117
GO:0061180	GO Biological Processes	19	mammary gland epithelium development	-15.2818	29.2837	18.9345	30169	59	227	13	5.72687	1.5422	207|367|595|2099|2247|2908|3091|3717|5241|5594|6714|6778|7421	AKT1|AR|CCND1|ESR1|FGF2|NR3C1|HIF1A|JAK2|PGR|MAPK1|SRC|STAT6|VDR	-13.495	-20.0724	75.9446
GO:0003012	GO Biological Processes	19	muscle system process	-15.2599	10.1877	13.6172	30169	287	227	22	9.69163	1.96358	134|136|624|1131|1909|1910|2146|2475|2548|3066|3320|3356|3553|4638|4842|5290|5733|6198|6548|6869|7124|7852	ADORA1|ADORA2B|BDKRB2|CHRM3|EDNRA|EDNRB|EZH2|MTOR|GAA|HDAC2|HSP90AA1|HTR2A|IL1B|MYLK|NOS1|PIK3CA|PTGER3|RPS6KB1|SLC9A1|TACR1|TNF|CXCR4	-13.4749	-26.7148	28.1916
GO:0006690	GO Biological Processes	19	icosanoid metabolic process	-15.2569	18.3315	16.2842	30169	116	227	16	7.04846	1.69888	240|834|1543|1544|1545|1557|2950|3248|4282|4363|5319|5742|5743|6850|7132|8399	ALOX5|CASP1|CYP1A1|CYP1A2|CYP1B1|CYP2C19|GSTP1|HPGD|MIF|ABCC1|PLA2G1B|PTGS1|PTGS2|SYK|TNFRSF1A|PLA2G10	-13.4736	-15.2569	25.3149
GO:0045787	GO Biological Processes	19	positive regulation of cell cycle	-15.1858	8.81125	13.0185	30169	362	227	24	10.5727	2.04087	25|207|595|891|894|983|1019|1543|1956|2146|2735|3480|3553|4193|5159|5781|6198|6714|6777|6790|7015|7124|11200|23476	ABL1|AKT1|CCND1|CCNB1|CCND2|CDK1|CDK4|CYP1A1|EGFR|EZH2|GLI1|IGF1R|IL1B|MDM2|PDGFRB|PTPN11|RPS6KB1|SRC|STAT5B|AURKA|TERT|TNF|CHEK2|BRD4	-13.4041	-15.1858	23.7327
GO:0051353	GO Biological Processes	19	positive regulation of oxidoreductase activity	-15.1786	28.7957	18.7651	30169	60	227	13	5.72687	1.5422	25|185|207|949|2185|3091|3553|7015|7124|7421|10392|11035|64127	ABL1|AGTR1|AKT1|SCARB1|PTK2B|HIF1A|IL1B|TERT|TNF|VDR|NOD1|RIPK3|NOD2	-13.3987	-15.7672	42.2873
GO:1903036	GO Biological Processes	19	positive regulation of response to wounding	-15.1625	24.1642	17.7208	30169	77	227	14	6.1674	1.59667	673|2147|2149|2152|2475|3265|3480|3688|4638|5054|5747|7494|7852|10855	BRAF|F2|F2R|F3|MTOR|HRAS|IGF1R|ITGB1|MYLK|SERPINE1|PTK2|XBP1|CXCR4|HPSE	-13.3843	-16.1767	25.7232
GO:0002718	GO Biological Processes	19	regulation of cytokine production involved in immune response	-15.1355	18.0208	16.1301	30169	118	227	16	7.04846	1.69888	383|3105|3553|3569|3718|3815|4282|6850|7099|7124|10392|10892|23411|54106|64127|114548	ARG1|HLA-A|IL1B|IL6|JAK3|KIT|MIF|SYK|TLR4|TNF|NOD1|MALT1|SIRT1|TLR9|NOD2|NLRP3	-13.359	-28.2991	25.5583
GO:0030217	GO Biological Processes	19	T cell differentiation	-15.1124	14.2396	14.9833	30169	168	227	18	7.92952	1.79337	25|596|673|2064|2475|3558|3569|3815|5295|5734|6097|6469|6774|6777|6778|6850|10803|11035	ABL1|BCL2|BRAF|ERBB2|MTOR|IL2|IL6|KIT|PIK3R1|PTGER4|RORC|SHH|STAT3|STAT5B|STAT6|SYK|CCR9|RIPK3	-13.3375	-37.9073	15.4538
GO:0010876	GO Biological Processes	19	lipid localization	-15.1054	8.73883	12.9518	30169	365	227	24	10.5727	2.04087	624|949|1080|1636|2168|2169|3553|4363|4843|5243|5319|5320|5467|5468|5743|6198|6555|6777|7124|8399|8694|9429|29881|51738	BDKRB2|SCARB1|CFTR|ACE|FABP1|FABP2|IL1B|ABCC1|NOS2|ABCB1|PLA2G1B|PLA2G2A|PPARD|PPARG|PTGS2|RPS6KB1|SLC10A2|STAT5B|TNF|PLA2G10|DGAT1|ABCG2|NPC1L1|GHRL	-13.3322	-15.1054	31.0107
GO:0051897	GO Biological Processes	19	positive regulation of protein kinase B signaling	-15.0164	17.7204	15.9797	30169	120	227	16	7.04846	1.69888	1956|2152|2247|2260|3320|3480|3488|3688|4233|5290|5747|5979|6714|7046|7124|10855	EGFR|F3|FGF2|FGFR1|HSP90AA1|IGF1R|IGFBP5|ITGB1|MET|PIK3CA|PTK2|RET|SRC|TGFBR1|TNF|HPSE	-13.2449	-15.4059	17.7204
GO:0002683	GO Biological Processes	19	negative regulation of immune system process	-15.0105	7.69595	12.4468	30169	449	227	26	11.4537	2.11371	134|142|196|207|383|472|836|1269|1432|1803|2064|3105|3123|3558|3718|4282|5295|5468|5734|6469|6714|6778|6850|7099|7124|64127	ADORA1|PARP1|AHR|AKT1|ARG1|ATM|CASP3|CNR2|MAPK14|DPP4|ERBB2|HLA-A|HLA-DRB1|IL2|JAK3|MIF|PIK3R1|PPARG|PTGER4|SHH|SRC|STAT6|SYK|TLR4|TNF|NOD2	-13.2406	-20.526	14.446
GO:0044403	GO Biological Processes	19	biological process involved in symbiotic interaction	-15.007	10.6934	13.6945	30169	261	227	21	9.2511	1.92311	185|290|598|949|983|1234|1508|1803|1956|1991|2033|2147|3065|3356|3383|3685|3688|3695|3717|6714|7852	AGTR1|ANPEP|BCL2L1|SCARB1|CDK1|CCR5|CTSB|DPP4|EGFR|ELANE|EP300|F2|HDAC1|HTR2A|ICAM1|ITGAV|ITGB1|ITGB7|JAK2|SRC|CXCR4	-13.2388	-15.007	30.6699
GO:0050671	GO Biological Processes	19	positive regulation of lymphocyte proliferation	-14.9126	15.475	15.2656	30169	146	227	17	7.48899	1.74701	596|3105|3553|3558|3569|3572|3717|3718|4282|6469|6777|6850|6869|7048|7099|7412|54106	BCL2|HLA-A|IL1B|IL2|IL6|IL6ST|JAK2|JAK3|MIF|SHH|STAT5B|SYK|TACR1|TGFBR2|TLR4|VCAM1|TLR9	-13.1461	-28.2991	25.5583
GO:1903706	GO Biological Processes	19	regulation of hemopoiesis	-14.8875	8.04498	12.552	30169	413	227	25	11.0132	2.07782	25|673|841|1432|2064|2185|2475|3091|3123|3558|3718|4323|5295|6469|6772|6774|6777|6850|7048|7099|7124|7494|10892|54106|114548	ABL1|BRAF|CASP8|MAPK14|ERBB2|PTK2B|MTOR|HIF1A|HLA-DRB1|IL2|JAK3|MMP14|PIK3R1|SHH|STAT1|STAT3|STAT5B|SYK|TGFBR2|TLR4|TNF|XBP1|MALT1|TLR9|NLRP3	-13.1226	-28.2991	25.5583
GO:2001243	GO Biological Processes	19	negative regulation of intrinsic apoptotic signaling pathway	-14.8303	19.7381	16.424	30169	101	227	15	6.60793	1.64883	207|596|598|624|3065|3091|4170|4193|4282|4318|5743|6714|7494|23411|57007	AKT1|BCL2|BCL2L1|BDKRB2|HDAC1|HIF1A|MCL1|MDM2|MIF|MMP9|PTGS2|SRC|XBP1|SIRT1|ACKR3	-13.067	-25.2515	21.4793
GO:0046883	GO Biological Processes	19	regulation of hormone secretion	-14.8178	11.3592	13.8513	30169	234	227	20	8.81057	1.88131	134|185|240|1080|1394|2645|3091|3123|3172|3553|3569|3717|4843|5467|5468|5781|6869|7124|9971|51738	ADORA1|AGTR1|ALOX5|CFTR|CRHR1|GCK|HIF1A|HLA-DRB1|HNF4A|IL1B|IL6|JAK2|NOS2|PPARD|PPARG|PTPN11|TACR1|TNF|NR1H4|GHRL	-13.0561	-26.71	29.534
GO:0032869	GO Biological Processes	19	cellular response to insulin stimulus	-14.812	15.2659	15.1483	30169	148	227	17	7.48899	1.74701	142|207|1019|2645|2932|3480|5170|5290|5295|5315|5319|5468|6198|6548|6714|6772|7494	PARP1|AKT1|CDK4|GCK|GSK3B|IGF1R|PDPK1|PIK3CA|PIK3R1|PKM|PLA2G1B|PPARG|RPS6KB1|SLC9A1|SRC|STAT1|XBP1	-13.052	-55.0431	17.0954
GO:0007610	GO Biological Processes	19	behavior	-14.7706	6.48853	11.7634	30169	594	227	29	12.7753	2.21561	25|207|596|673|836|894|1394|1636|1803|1956|2033|2475|2548|2908|3066|3091|3356|3688|3815|4311|4988|5594|5743|6198|6446|6714|6774|6869|51738	ABL1|AKT1|BCL2|BRAF|CASP3|CCND2|CRHR1|ACE|DPP4|EGFR|EP300|MTOR|GAA|NR3C1|HDAC2|HIF1A|HTR2A|ITGB1|KIT|MME|OPRM1|MAPK1|PTGS2|RPS6KB1|SGK1|SRC|STAT3|TACR1|GHRL	-13.0122	-14.7706	49.8387
GO:0001890	GO Biological Processes	19	placenta development	-14.7623	15.1634	15.0905	30169	149	227	17	7.48899	1.74701	142|207|841|1432|1508|1956|2034|3091|4311|5467|5468|5594|5604|5743|5747|7421|51738	PARP1|AKT1|CASP8|MAPK14|CTSB|EGFR|EPAS1|HIF1A|MME|PPARD|PPARG|MAPK1|MAP2K1|PTGS2|PTK2|VDR|GHRL	-13.0055	-20.2052	31.8967
GO:0032677	GO Biological Processes	19	regulation of interleukin-8 production	-14.6986	19.3548	16.2471	30169	103	227	15	6.60793	1.64883	1991|2149|2152|3553|3569|4843|5054|5319|6774|6850|7099|7124|10392|54106|64127	ELANE|F2R|F3|IL1B|IL6|NOS2|SERPINE1|PLA2G1B|STAT3|SYK|TLR4|TNF|NOD1|TLR9|NOD2	-12.9434	-25.3768	31.6436
GO:1901655	GO Biological Processes	19	cellular response to ketone	-14.6339	19.1687	16.1605	30169	104	227	15	6.60793	1.64883	196|207|367|383|1019|1080|1545|1636|2908|3480|3717|5734|6198|6446|6714	AHR|AKT1|AR|ARG1|CDK4|CFTR|CYP1B1|ACE|NR3C1|IGF1R|JAK2|PTGER4|RPS6KB1|SGK1|SRC	-12.8803	-21.1405	24.7262
GO:0001655	GO Biological Processes	19	urogenital system development	-14.6196	8.86021	12.7852	30169	345	227	23	10.1322	2.00281	185|367|596|1636|1909|1910|2099|2246|2247|2735|3248|3579|4311|4313|4953|5156|5159|5915|5979|6469|6772|7046|7422	AGTR1|AR|BCL2|ACE|EDNRA|EDNRB|ESR1|FGF1|FGF2|GLI1|HPGD|CXCR2|MME|MMP2|ODC1|PDGFRA|PDGFRB|RARB|RET|SHH|STAT1|TGFBR1|VEGFA	-12.8676	-14.6196	49.8387
GO:0035270	GO Biological Processes	19	endocrine system development	-14.6164	16.7437	15.4807	30169	127	227	16	7.04846	1.69888	673|1394|1545|1909|2247|2735|2908|3172|3569|5156|5170|5594|5595|5604|6469|7046	BRAF|CRHR1|CYP1B1|EDNRA|FGF2|GLI1|NR3C1|HNF4A|IL6|PDGFRA|PDPK1|MAPK1|MAPK3|MAP2K1|SHH|TGFBR1	-12.866	-40.3519	27.6881
GO:0032652	GO Biological Processes	19	regulation of interleukin-1 production	-14.4525	16.3573	15.2788	30169	130	227	16	7.04846	1.69888	834|841|2149|2950|3066|3569|3717|6774|7099|7124|9971|10392|10892|51738|64127|114548	CASP1|CASP8|F2R|GSTP1|HDAC2|IL6|JAK2|STAT3|TLR4|TNF|NR1H4|NOD1|MALT1|GHRL|NOD2|NLRP3	-12.7048	-25.3768	31.6436
GO:0071466	GO Biological Processes	19	cellular response to xenobiotic stimulus	-14.4521	13.0724	14.2629	30169	183	227	18	7.92952	1.79337	196|673|1543|1544|1545|1557|1576|2950|3172|3553|4363|4842|4843|5243|6097|7852|8856|11200	AHR|BRAF|CYP1A1|CYP1A2|CYP1B1|CYP2C19|CYP3A4|GSTP1|HNF4A|IL1B|ABCC1|NOS1|NOS2|ABCB1|RORC|CXCR4|NR1I2|CHEK2	-12.7048	-31.4217	14.6419
GO:0060562	GO Biological Processes	19	epithelial tube morphogenesis	-14.4462	9.31168	12.8911	30169	314	227	22	9.69163	1.96358	25|367|596|836|1909|2099|2246|2247|2908|3091|3579|3791|4233|4323|5241|5979|6469|6714|7048|7421|7422|7852	ABL1|AR|BCL2|CASP3|EDNRA|ESR1|FGF1|FGF2|NR3C1|HIF1A|CXCR2|KDR|MET|MMP14|PGR|RET|SHH|SRC|TGFBR2|VDR|VEGFA|CXCR4	-12.7005	-17.1966	14.5514
GO:0046903	GO Biological Processes	19	secretion	-14.4151	6.90074	11.8181	30169	520	227	27	11.8943	2.14861	134|136|595|624|673|768|887|1080|1131|1394|1636|1910|3091|3274|3569|3815|4843|5319|5320|5743|6777|6850|7421|7422|7498|8399|51738	ADORA1|ADORA2B|CCND1|BDKRB2|BRAF|CA9|CCKBR|CFTR|CHRM3|CRHR1|ACE|EDNRB|HIF1A|HRH2|IL6|KIT|NOS2|PLA2G1B|PLA2G2A|PTGS2|STAT5B|SYK|VDR|VEGFA|XDH|PLA2G10|GHRL	-12.6709	-14.4151	36.2463
GO:1900182	GO Biological Processes	19	positive regulation of protein localization to nucleus	-14.3825	21.3867	16.5806	30169	87	227	14	6.1674	1.59667	142|207|983|1432|2147|3320|3717|5295|5347|5743|6469|6714|7015|8841	PARP1|AKT1|CDK1|MAPK14|F2|HSP90AA1|JAK2|PIK3R1|PLK1|PTGS2|SHH|SRC|TERT|HDAC3	-12.6399	-22.1473	26.5806
GO:1905952	GO Biological Processes	19	regulation of lipid localization	-14.3686	12.9311	14.1732	30169	185	227	18	7.92952	1.79337	185|207|949|1394|3553|3569|3685|4282|4790|5467|5468|5781|6469|6850|7124|8399|23411|51738	AGTR1|AKT1|SCARB1|CRHR1|IL1B|IL6|ITGAV|MIF|NFKB1|PPARD|PPARG|PTPN11|SHH|SYK|TNF|PLA2G10|SIRT1|GHRL	-12.6276	-14.3686	30.2052
GO:0002702	GO Biological Processes	19	positive regulation of production of molecular mediator of immune response	-14.2927	15.9883	15.0836	30169	133	227	16	7.04846	1.69888	3105|3553|3558|3569|3815|4282|6778|6850|7099|7494|10392|10892|23411|54106|64127|114548	HLA-A|IL1B|IL2|IL6|KIT|MIF|STAT6|SYK|TLR4|XBP1|NOD1|MALT1|SIRT1|TLR9|NOD2|NLRP3	-12.5533	-28.2991	25.5583
GO:0071496	GO Biological Processes	19	cellular response to external stimulus	-14.2762	9.13709	12.7416	30169	320	227	22	9.69163	1.96358	136|596|834|841|2247|2475|3480|3553|4790|5594|5595|5599|5734|5743|6548|7099|7132|7412|7421|7494|9971|23411	ADORA2B|BCL2|CASP1|CASP8|FGF2|MTOR|IGF1R|IL1B|NFKB1|MAPK1|MAPK3|MAPK8|PTGER4|PTGS2|SLC9A1|TLR4|TNFRSF1A|VCAM1|VDR|XBP1|NR1H4|SIRT1	-12.5383	-28.706	23.6677
GO:0044409	GO Biological Processes	19	entry into host	-14.2594	18.1231	15.6653	30169	110	227	15	6.60793	1.64883	185|290|949|983|1234|1508|1803|1956|3356|3383|3685|3688|3695|6714|7852	AGTR1|ANPEP|SCARB1|CDK1|CCR5|CTSB|DPP4|EGFR|HTR2A|ICAM1|ITGAV|ITGB1|ITGB7|SRC|CXCR4	-12.523	-15.007	30.6699
GO:0002064	GO Biological Processes	19	epithelial cell development	-14.2454	12.7248	14.0412	30169	188	227	18	7.92952	1.79337	367|1909|1910|2034|2099|3091|3172|3383|3572|3791|4233|5170|5241|5915|6714|7298|7852|10855	AR|EDNRA|EDNRB|EPAS1|ESR1|HIF1A|HNF4A|ICAM1|IL6ST|KDR|MET|PDPK1|PGR|RARB|SRC|TYMS|CXCR4|HPSE	-12.5108	-17.2451	37.9723
GO:0043542	GO Biological Processes	19	endothelial cell migration	-14.2441	24.682	17.2718	30169	70	227	13	5.72687	1.5422	25|207|949|1545|1803|2185|2247|3688|3791|3964|5290|7046|7422	ABL1|AKT1|SCARB1|CYP1B1|DPP4|PTK2B|FGF2|ITGB1|KDR|LGALS8|PIK3CA|TGFBR1|VEGFA	-12.5108	-18.7692	49.8387
GO:0042113	GO Biological Processes	19	B cell activation	-14.2048	12.6574	13.9979	30169	189	227	18	7.92952	1.79337	25|472|596|841|2033|2146|2185|3569|3688|3718|3815|5295|6777|6778|6850|7099|7412|10892	ABL1|ATM|BCL2|CASP8|EP300|EZH2|PTK2B|IL6|ITGB1|JAK3|KIT|PIK3R1|STAT5B|STAT6|SYK|TLR4|VCAM1|MALT1	-12.4745	-37.9073	15.4538
GO:0043123	GO Biological Processes	19	positive regulation of I-kappaB kinase/NF-kappaB signaling	-14.2048	12.6574	13.9979	30169	189	227	18	7.92952	1.79337	25|330|834|841|1147|2149|3123|3551|3553|7099|7124|7132|8517|10392|10892|23476|54106|64127	ABL1|BIRC3|CASP1|CASP8|CHUK|F2R|HLA-DRB1|IKBKB|IL1B|TLR4|TNF|TNFRSF1A|IKBKG|NOD1|MALT1|BRD4|TLR9|NOD2	-12.4745	-25.3768	31.6436
GO:0048872	GO Biological Processes	19	homeostasis of number of cells	-14.1989	10.5479	13.2524	30169	252	227	20	8.81057	1.88131	25|207|331|596|836|2034|2146|2149|2539|3091|3569|3717|3718|3815|5320|5781|6777|7422|8399|11035	ABL1|AKT1|XIAP|BCL2|CASP3|EPAS1|EZH2|F2R|G6PD|HIF1A|IL6|JAK2|JAK3|KIT|PLA2G2A|PTPN11|STAT5B|VEGFA|PLA2G10|RIPK3	-12.4701	-14.1989	12.7248
GO:0010863	GO Biological Processes	19	positive regulation of phospholipase C activity	-14.184	36.5483	19.5886	30169	40	227	11	4.84581	1.42523	1909|1956|2099|2247|2260|2321|3265|3356|3815|5156|5159	EDNRA|EGFR|ESR1|FGF2|FGFR1|FLT1|HRAS|HTR2A|KIT|PDGFRA|PDGFRB	-12.4567	-17.9628	37.9723
GO:0043270	GO Biological Processes	19	positive regulation of ion transport	-14.1219	9.65732	12.8762	30169	289	227	21	9.2511	1.92311	25|134|207|623|1080|1909|2147|2149|2539|3553|3688|3718|4282|4638|4842|5159|5170|5243|5319|6548|8399	ABL1|ADORA1|AKT1|BDKRB1|CFTR|EDNRA|F2|F2R|G6PD|IL1B|ITGB1|JAK3|MIF|MYLK|NOS1|PDGFRB|PDPK1|ABCB1|PLA2G1B|SLC9A1|PLA2G10	-12.3961	-19.6206	16.2077
GO:0061041	GO Biological Processes	19	regulation of wound healing	-14.0859	15.5215	14.8329	30169	137	227	16	7.04846	1.69888	240|2147|2149|2152|2247|2475|3265|3688|4638|5054|5156|5747|7124|7494|7852|10855	ALOX5|F2|F2R|F3|FGF2|MTOR|HRAS|ITGB1|MYLK|SERPINE1|PDGFRA|PTK2|TNF|XBP1|CXCR4|HPSE	-12.3617	-16.1767	25.7232
GO:0050708	GO Biological Processes	19	regulation of protein secretion	-14.0359	10.3427	13.0966	30169	257	227	20	8.81057	1.88131	240|1080|2149|2645|3091|3123|3172|3553|3569|3717|4843|4988|5319|5467|5468|5781|7099|7124|9971|51738	ALOX5|CFTR|F2R|GCK|HIF1A|HLA-DRB1|HNF4A|IL1B|IL6|JAK2|NOS2|OPRM1|PLA2G1B|PPARD|PPARG|PTPN11|TLR4|TNF|NR1H4|GHRL	-12.3131	-26.71	29.534
GO:0071260	GO Biological Processes	19	cellular response to mechanical stimulus	-13.9933	23.6677	16.8834	30169	73	227	13	5.72687	1.5422	834|841|2247|3480|3553|4790|5595|5599|5734|5743|6548|7099|7132	CASP1|CASP8|FGF2|IGF1R|IL1B|NFKB1|MAPK3|MAPK8|PTGER4|PTGS2|SLC9A1|TLR4|TNFRSF1A	-12.272	-28.706	23.6677
GO:0002252	GO Biological Processes	19	immune effector process	-13.99	7.35083	11.8452	30169	452	227	25	11.0132	2.07782	25|136|1636|1991|2147|2185|2475|3105|3123|3383|3558|3569|3815|4353|5319|5551|5734|5747|6097|6714|6774|6777|6778|6850|7099	ABL1|ADORA2B|ACE|ELANE|F2|PTK2B|MTOR|HLA-A|HLA-DRB1|ICAM1|IL2|IL6|KIT|MPO|PLA2G1B|PRF1|PTGER4|PTK2|RORC|SRC|STAT3|STAT5B|STAT6|SYK|TLR4	-12.2701	-13.99	28.892
GO:0032872	GO Biological Processes	19	regulation of stress-activated MAPK cascade	-13.9661	12.268	13.7447	30169	195	227	18	7.92952	1.79337	331|1956|2185|2950|3265|3480|3553|5594|5595|5604|7099|7124|7422|7498|8841|10392|54106|64127	XIAP|EGFR|PTK2B|GSTP1|HRAS|IGF1R|IL1B|MAPK1|MAPK3|MAP2K1|TLR4|TNF|VEGFA|XDH|HDAC3|NOD1|TLR9|NOD2	-12.2478	-25.3768	31.6436
GO:0044089	GO Biological Processes	19	positive regulation of cellular component biogenesis	-13.9473	6.93872	11.6355	30169	498	227	26	11.4537	2.11371	25|472|673|1017|1786|2099|2185|2475|2932|3265|3320|3791|3815|4233|4314|5290|5295|5879|6714|6850|6869|7046|7099|7124|7422|51738	ABL1|ATM|BRAF|CDK2|DNMT1|ESR1|PTK2B|MTOR|GSK3B|HRAS|HSP90AA1|KDR|KIT|MET|MMP3|PIK3CA|PIK3R1|RAC1|SRC|SYK|TACR1|TGFBR1|TLR4|TNF|VEGFA|GHRL	-12.2304	-13.9473	22.9143
GO:0048871	GO Biological Processes	19	multicellular organismal homeostasis	-13.9196	8.21713	12.1954	30169	372	227	23	10.1322	2.00281	134|331|596|1080|2034|2149|2185|3356|3553|3569|3688|3791|4233|5290|5743|5781|6714|6774|7099|7422|23411|54106|64127	ADORA1|XIAP|BCL2|CFTR|EPAS1|F2R|PTK2B|HTR2A|IL1B|IL6|ITGB1|KDR|MET|PIK3CA|PTGS2|PTPN11|SRC|STAT3|TLR4|VEGFA|SIRT1|TLR9|NOD2	-12.2042	-13.9196	15.1889
GO:0022600	GO Biological Processes	19	digestive system process	-13.9122	23.3478	16.7591	30169	74	227	13	5.72687	1.5422	887|949|1131|2168|2169|3274|6523|7099|7421|29881|51738|54106|64127	CCKBR|SCARB1|CHRM3|FABP1|FABP2|HRH2|SLC5A1|TLR4|VDR|NPC1L1|GHRL|TLR9|NOD2	-12.1983	-13.9122	28.4792
GO:0009636	GO Biological Processes	19	response to toxic substance	-13.8981	11.0753	13.2965	30169	228	227	19	8.37004	1.8381	196|383|596|983|1543|1545|2168|2950|4353|5159|5243|5742|5743|6198|7124|7298|9429|10327|57016	AHR|ARG1|BCL2|CDK1|CYP1A1|CYP1B1|FABP1|GSTP1|MPO|PDGFRB|ABCB1|PTGS1|PTGS2|RPS6KB1|TNF|TYMS|ABCG2|AKR1A1|AKR1B10	-12.1856	-13.8981	11.0753
GO:0032768	GO Biological Processes	19	regulation of monooxygenase activity	-13.8893	27.9796	17.7521	30169	57	227	12	5.28634	1.48515	207|949|1269|1956|2185|3091|3553|4790|7015|7124|7421|10392	AKT1|SCARB1|CNR2|EGFR|PTK2B|HIF1A|IL1B|NFKB1|TERT|TNF|VDR|NOD1	-12.1783	-15.7672	42.2873
GO:0032787	GO Biological Processes	19	monocarboxylic acid metabolic process	-13.8659	6.88343	11.5742	30169	502	227	26	11.4537	2.11371	240|1432|1543|1544|1545|1557|1576|2169|2645|2950|3091|3248|3356|3417|4282|5315|5319|5467|5468|5742|5743|7132|7494|8399|9971|10327	ALOX5|MAPK14|CYP1A1|CYP1A2|CYP1B1|CYP2C19|CYP3A4|FABP2|GCK|GSTP1|HIF1A|HPGD|HTR2A|IDH1|MIF|PKM|PLA2G1B|PPARD|PPARG|PTGS1|PTGS2|TNFRSF1A|XBP1|PLA2G10|NR1H4|AKR1A1	-12.1563	-15.2569	25.3149
GO:0070302	GO Biological Processes	19	regulation of stress-activated protein kinase signaling cascade	-13.8499	12.0821	13.6223	30169	198	227	18	7.92952	1.79337	331|1956|2185|2950|3265|3480|3553|5594|5595|5604|7099|7124|7422|7498|8841|10392|54106|64127	XIAP|EGFR|PTK2B|GSTP1|HRAS|IGF1R|IL1B|MAPK1|MAPK3|MAP2K1|TLR4|TNF|VEGFA|XDH|HDAC3|NOD1|TLR9|NOD2	-12.1417	-25.3768	31.6436
GO:0051384	GO Biological Processes	19	response to glucocorticoid	-13.8367	14.975	14.534	30169	142	227	16	7.04846	1.69888	249|383|595|596|836|1545|1636|2908|3480|3569|3717|5290|5743|6198|7124|7298	ALPL|ARG1|CCND1|BCL2|CASP3|CYP1B1|ACE|NR3C1|IGF1R|IL6|JAK2|PIK3CA|PTGS2|RPS6KB1|TNF|TYMS	-12.13	-21.1405	24.7262
GO:0019233	GO Biological Processes	19	sensory perception of pain	-13.8324	23.0365	16.6372	30169	75	227	13	5.72687	1.5422	134|623|1269|1636|1910|3356|4311|4988|5595|5743|6869|7124|7852	ADORA1|BDKRB1|CNR2|ACE|EDNRB|HTR2A|MME|OPRM1|MAPK3|PTGS2|TACR1|TNF|CXCR4	-12.1271	-13.8324	23.0365
GO:0050769	GO Biological Processes	19	positive regulation of neurogenesis	-13.7943	10.9314	13.1933	30169	231	227	19	8.37004	1.8381	673|1636|2247|2475|3065|3066|3091|3553|3569|3572|3688|3815|4311|4988|5604|6469|7124|7422|7852	BRAF|ACE|FGF2|MTOR|HDAC1|HDAC2|HIF1A|IL1B|IL6|IL6ST|ITGB1|KIT|MME|OPRM1|MAP2K1|SHH|TNF|VEGFA|CXCR4	-12.0905	-18.317	26.5806
GO:0051054	GO Biological Processes	19	positive regulation of DNA metabolic process	-13.7719	9.27231	12.5589	30169	301	227	21	9.2511	1.92311	142|207|472|983|1017|1545|1956|2185|2247|2735|3320|3480|3558|3569|5159|5594|5595|6714|6778|7124|23411	PARP1|AKT1|ATM|CDK1|CDK2|CYP1B1|EGFR|PTK2B|FGF2|GLI1|HSP90AA1|IGF1R|IL2|IL6|PDGFRB|MAPK1|MAPK3|SRC|STAT6|TNF|SIRT1	-12.0694	-13.7719	17.9599
GO:0090066	GO Biological Processes	19	regulation of anatomical structure size	-13.7253	6.78876	11.4685	30169	509	227	26	11.4537	2.11371	25|134|136|185|624|1131|1636|1909|1910|2149|2185|2475|2932|3274|3320|3356|4313|4842|5290|5467|5743|5879|5979|6869|7124|7422	ABL1|ADORA1|ADORA2B|AGTR1|BDKRB2|CHRM3|ACE|EDNRA|EDNRB|F2R|PTK2B|MTOR|GSK3B|HRH2|HSP90AA1|HTR2A|MMP2|NOS1|PIK3CA|PPARD|PTGS2|RAC1|RET|TACR1|TNF|VEGFA	-12.0243	-26.7148	28.1916
GO:2001242	GO Biological Processes	19	regulation of intrinsic apoptotic signaling pathway	-13.7115	13.1358	13.8976	30169	172	227	17	7.48899	1.74701	142|207|596|598|624|3065|3091|4170|4193|4282|4318|5743|6714|7494|11035|23411|57007	PARP1|AKT1|BCL2|BCL2L1|BDKRB2|HDAC1|HIF1A|MCL1|MDM2|MIF|MMP9|PTGS2|SRC|XBP1|RIPK3|SIRT1|ACKR3	-12.0119	-25.2515	21.4793
GO:0036294	GO Biological Processes	19	cellular response to decreased oxygen levels	-13.6919	14.6652	14.3619	30169	145	227	16	7.04846	1.69888	207|596|890|2034|2168|2475|3091|4193|5467|5468|5743|6548|6714|7015|7422|23411	AKT1|BCL2|CCNA2|EPAS1|FABP1|MTOR|HIF1A|MDM2|PPARD|PPARG|PTGS2|SLC9A1|SRC|TERT|VEGFA|SIRT1	-11.9937	-30.5084	15.443
GO:0051047	GO Biological Processes	19	positive regulation of secretion	-13.6869	9.18081	12.4824	30169	304	227	21	9.2511	1.92311	134|136|1080|1910|2645|3091|3123|3553|3717|4282|5319|5467|5468|5781|6850|6869|7099|7494|8399|9971|51738	ADORA1|ADORA2B|CFTR|EDNRB|GCK|HIF1A|HLA-DRB1|IL1B|JAK2|MIF|PLA2G1B|PPARD|PPARG|PTPN11|SYK|TACR1|TLR4|XBP1|PLA2G10|NR1H4|GHRL	-11.9906	-26.71	29.534
GO:0010959	GO Biological Processes	19	regulation of metal ion transport	-13.686	7.5406	11.7956	30169	423	227	24	10.5727	2.04087	25|134|207|596|623|1394|1636|2147|2149|2185|2539|2645|3356|3688|3718|4638|4842|5159|5170|5319|5743|6548|7852|54106	ABL1|ADORA1|AKT1|BCL2|BDKRB1|CRHR1|ACE|F2|F2R|PTK2B|G6PD|GCK|HTR2A|ITGB1|JAK3|MYLK|NOS1|PDGFRB|PDPK1|PLA2G1B|PTGS2|SLC9A1|CXCR4|TLR9	-11.9906	-19.6206	16.2077
GO:0010506	GO Biological Processes	19	regulation of autophagy	-13.6307	8.49962	12.1807	30169	344	227	22	9.69163	1.96358	25|207|472|596|836|1612|2033|2475|2932|3091|3791|4170|4233|5290|5595|5599|6774|8517|10392|23411|54106|64127	ABL1|AKT1|ATM|BCL2|CASP3|DAPK1|EP300|MTOR|GSK3B|HIF1A|KDR|MCL1|MET|PIK3CA|MAPK3|MAPK8|STAT3|IKBKG|NOD1|SIRT1|TLR9|NOD2	-11.9367	-18.0996	12.4043
GO:0046686	GO Biological Processes	19	response to cadmium ion	-13.6016	26.5806	17.2697	30169	60	227	12	5.28634	1.48515	207|383|983|1147|1544|1956|3815|4318|5594|5595|5599|7015	AKT1|ARG1|CDK1|CHUK|CYP1A2|EGFR|KIT|MMP9|MAPK1|MAPK3|MAPK8|TERT	-11.909	-17.3351	28.7358
GO:0034764	GO Biological Processes	19	positive regulation of transmembrane transport	-13.5913	10.6547	12.9924	30169	237	227	19	8.37004	1.8381	25|207|623|673|1080|1432|1909|2147|2149|2539|3688|4842|5170|5243|5295|5319|5781|6548|7015	ABL1|AKT1|BDKRB1|BRAF|CFTR|MAPK14|EDNRA|F2|F2R|G6PD|ITGB1|NOS1|PDPK1|ABCB1|PIK3R1|PLA2G1B|PTPN11|SLC9A1|TERT	-11.9001	-19.6206	16.2077
GO:0060416	GO Biological Processes	19	response to growth hormone	-13.5751	41.5322	19.9743	30169	32	227	10	4.40529	1.36204	207|3488|3716|3717|3718|5295|5747|6774|6777|6778	AKT1|IGFBP5|JAK1|JAK2|JAK3|PIK3R1|PTK2|STAT3|STAT5B|STAT6	-11.8852	-13.5751	79.7419
GO:0032755	GO Biological Processes	19	positive regulation of interleukin-6 production	-13.5702	18.7944	15.4411	30169	99	227	14	6.1674	1.59667	136|2149|3553|3569|4843|5781|6774|6850|7099|7124|7494|10392|54106|64127	ADORA2B|F2R|IL1B|IL6|NOS2|PTPN11|STAT3|SYK|TLR4|TNF|XBP1|NOD1|TLR9|NOD2	-11.8817	-25.3768	31.6436
GO:0007346	GO Biological Processes	19	regulation of mitotic cell cycle	-13.5674	6.68371	11.35	30169	517	227	26	11.4537	2.11371	25|207|472|595|596|891|894|983|1017|1019|1543|1956|2146|3553|4193|5159|5347|5781|6198|6777|6790|7015|7124|11200|23411|23476	ABL1|AKT1|ATM|CCND1|BCL2|CCNB1|CCND2|CDK1|CDK2|CDK4|CYP1A1|EGFR|EZH2|IL1B|MDM2|PDGFRB|PLK1|PTPN11|RPS6KB1|STAT5B|AURKA|TERT|TNF|CHEK2|SIRT1|BRD4	-11.8803	-15.1858	23.7327
GO:0060443	GO Biological Processes	19	mammary gland morphogenesis	-13.5557	32.4874	18.4049	30169	45	227	11	4.84581	1.42523	367|383|2099|2908|3488|4790|5241|6714|6778|7048|7421	AR|ARG1|ESR1|NR3C1|IGFBP5|NFKB1|PGR|SRC|STAT6|TGFBR2|VDR	-11.87	-20.0724	75.9446
GO:0038127	GO Biological Processes	19	ERBB signaling pathway	-13.5093	26.1449	17.1167	30169	61	227	12	5.28634	1.48515	25|207|673|1956|2064|2185|5170|5290|5594|5747|5781|6714	ABL1|AKT1|BRAF|EGFR|ERBB2|PTK2B|PDPK1|PIK3CA|MAPK1|PTK2|PTPN11|SRC	-11.825	-13.5093	29.8354
GO:0009411	GO Biological Processes	19	response to UV	-13.5039	14.2715	14.1401	30169	149	227	16	7.04846	1.69888	142|207|595|596|836|1956|1991|2033|4311|4313|4314|4318|5295|5599|5743|23411	PARP1|AKT1|CCND1|BCL2|CASP3|EGFR|ELANE|EP300|MME|MMP2|MMP3|MMP9|PIK3R1|MAPK8|PTGS2|SIRT1	-11.8209	-19.0999	66.4515
GO:0042593	GO Biological Processes	19	glucose homeostasis	-13.44	11.4462	13.1949	30169	209	227	18	7.92952	1.79337	207|240|1636|2645|3091|3172|3383|3480|3488|3569|5290|5295|5468|5781|6774|7494|9971|23411	AKT1|ALOX5|ACE|GCK|HIF1A|HNF4A|ICAM1|IGF1R|IGFBP5|IL6|PIK3CA|PIK3R1|PPARG|PTPN11|STAT3|XBP1|NR1H4|SIRT1	-11.7584	-13.44	12.7791
GO:0051051	GO Biological Processes	19	negative regulation of transport	-13.4197	6.93649	11.4035	30169	479	227	25	11.0132	2.07782	134|207|596|673|1394|1636|2149|2185|3356|3553|3685|4318|4790|4842|4988|5733|5743|5781|5879|6469|7124|7132|8399|51738|54106	ADORA1|AKT1|BCL2|BRAF|CRHR1|ACE|F2R|PTK2B|HTR2A|IL1B|ITGAV|MMP9|NFKB1|NOS1|OPRM1|PTGER3|PTGS2|PTPN11|RAC1|SHH|TNF|TNFRSF1A|PLA2G10|GHRL|TLR9	-11.7398	-13.4197	10.7759
GO:0090303	GO Biological Processes	19	positive regulation of wound healing	-13.4188	25.7232	16.9673	30169	62	227	12	5.28634	1.48515	2147|2149|2152|2475|3265|3688|4638|5054|5747|7494|7852|10855	F2|F2R|F3|MTOR|HRAS|ITGB1|MYLK|SERPINE1|PTK2|XBP1|CXCR4|HPSE	-11.7398	-16.1767	25.7232
GO:0043280	GO Biological Processes	19	positive regulation of cysteine-type endopeptidase activity involved in apoptotic process	-13.4155	15.9484	14.582	30169	125	227	15	6.60793	1.64883	834|841|1509|1612|2149|2152|3717|5468|6850|7124|7498|10392|10892|23411|114548	CASP1|CASP8|CTSD|DAPK1|F2R|F3|JAK2|PPARG|SYK|TNF|XDH|NOD1|MALT1|SIRT1|NLRP3	-11.7378	-26.7434	15.9484
GO:0033500	GO Biological Processes	19	carbohydrate homeostasis	-13.404	11.3917	13.1576	30169	210	227	18	7.92952	1.79337	207|240|1636|2645|3091|3172|3383|3480|3488|3569|5290|5295|5468|5781|6774|7494|9971|23411	AKT1|ALOX5|ACE|GCK|HIF1A|HNF4A|ICAM1|IGF1R|IGFBP5|IL6|PIK3CA|PIK3R1|PPARG|PTPN11|STAT3|XBP1|NR1H4|SIRT1	-11.7277	-13.44	12.7791
GO:0048771	GO Biological Processes	19	tissue remodeling	-13.3844	18.2416	15.1872	30169	102	227	14	6.1674	1.59667	383|1636|1909|2034|2149|2185|3091|3488|4193|4313|4323|4790|6714|7421	ARG1|ACE|EDNRA|EPAS1|F2R|PTK2B|HIF1A|IGFBP5|MDM2|MMP2|MMP14|NFKB1|SRC|VDR	-11.7095	-13.3844	18.2416
GO:0051962	GO Biological Processes	19	positive regulation of nervous system development	-13.3587	9.5271	12.4591	30169	279	227	20	8.81057	1.88131	673|1636|2247|2475|3065|3066|3091|3553|3569|3572|3688|3815|4311|4988|5604|6469|7124|7422|7852|51738	BRAF|ACE|FGF2|MTOR|HDAC1|HDAC2|HIF1A|IL1B|IL6|IL6ST|ITGB1|KIT|MME|OPRM1|MAP2K1|SHH|TNF|VEGFA|CXCR4|GHRL	-11.6851	-18.317	26.5806
GO:0042129	GO Biological Processes	19	regulation of T cell proliferation	-13.3028	12.414	13.4479	30169	182	227	17	7.48899	1.74701	383|836|2064|3105|3123|3553|3558|3569|3572|3717|3718|6469|6777|6850|7048|7412|11035	ARG1|CASP3|ERBB2|HLA-A|HLA-DRB1|IL1B|IL2|IL6|IL6ST|JAK2|JAK3|SHH|STAT5B|SYK|TGFBR2|VCAM1|RIPK3	-11.6319	-28.2991	25.5583
GO:0071356	GO Biological Processes	19	cellular response to tumor necrosis factor	-13.3028	12.414	13.4479	30169	182	227	17	7.48899	1.74701	207|330|1147|1432|1545|2185|3551|3576|3717|4790|5594|5595|6772|7124|7132|7412|23411	AKT1|BIRC3|CHUK|MAPK14|CYP1B1|PTK2B|IKBKB|CXCL8|JAK2|NFKB1|MAPK1|MAPK3|STAT1|TNF|TNFRSF1A|VCAM1|SIRT1	-11.6319	-33.8084	18.6531
GO:0051092	GO Biological Processes	19	positive regulation of NF-kappaB transcription factor activity	-13.2767	13.8081	13.8747	30169	154	227	16	7.04846	1.69888	367|1147|2033|3551|3553|5319|6774|7099|7124|8517|10392|10892|11035|54106|64127|114548	AR|CHUK|EP300|IKBKB|IL1B|PLA2G1B|STAT3|TLR4|TNF|IKBKG|NOD1|MALT1|RIPK3|TLR9|NOD2|NLRP3	-11.6071	-25.3768	31.6436
GO:0051701	GO Biological Processes	19	biological process involved in interaction with host	-13.2323	13.719	13.823	30169	155	227	16	7.04846	1.69888	185|290|598|949|983|1234|1508|1803|1956|3356|3383|3685|3688|3695|6714|7852	AGTR1|ANPEP|BCL2L1|SCARB1|CDK1|CCR5|CTSB|DPP4|EGFR|HTR2A|ICAM1|ITGAV|ITGB1|ITGB7|SRC|CXCR4	-11.5639	-15.007	30.6699
GO:0030183	GO Biological Processes	19	B cell differentiation	-13.2095	15.4538	14.3243	30169	129	227	15	6.60793	1.64883	25|472|596|2033|2146|2185|3569|3688|3718|3815|5295|6777|6850|7412|10892	ABL1|ATM|BCL2|EP300|EZH2|PTK2B|IL6|ITGB1|JAK3|KIT|PIK3R1|STAT5B|SYK|VCAM1|MALT1	-11.5438	-37.9073	15.4538
GO:0045931	GO Biological Processes	19	positive regulation of mitotic cell cycle	-13.2095	15.4538	14.3243	30169	129	227	15	6.60793	1.64883	25|207|595|891|894|983|1019|1543|1956|4193|5781|6198|6777|7015|23476	ABL1|AKT1|CCND1|CCNB1|CCND2|CDK1|CDK4|CYP1A1|EGFR|MDM2|PTPN11|RPS6KB1|STAT5B|TERT|BRD4	-11.5438	-15.1858	23.7327
GO:0007173	GO Biological Processes	19	epidermal growth factor receptor signaling pathway	-13.1092	29.8354	17.589	30169	49	227	11	4.84581	1.42523	25|207|673|1956|2064|2185|5170|5290|5747|5781|6714	ABL1|AKT1|BRAF|EGFR|ERBB2|PTK2B|PDPK1|PIK3CA|PTK2|PTPN11|SRC	-11.4461	-13.5093	29.8354
GO:0010595	GO Biological Processes	19	positive regulation of endothelial cell migration	-13.1092	15.2179	14.1998	30169	131	227	15	6.60793	1.64883	25|207|949|2185|2246|2247|2260|3091|3791|4233|5170|5743|5879|7422|23411	ABL1|AKT1|SCARB1|PTK2B|FGF1|FGF2|FGFR1|HIF1A|KDR|MET|PDPK1|PTGS2|RAC1|VEGFA|SIRT1	-11.4461	-27.9533	17.7204
GO:0019725	GO Biological Processes	19	cellular homeostasis	-13.0748	5.80544	10.7076	30169	641	227	28	12.3348	2.18256	134|249|479|596|1080|1636|1909|1991|2147|2548|2645|3091|3356|3383|3480|3569|4170|4842|4843|5290|5295|5594|5595|6548|7421|7494|9971|23411	ADORA1|ALPL|ATP12A|BCL2|CFTR|ACE|EDNRA|ELANE|F2|GAA|GCK|HIF1A|HTR2A|ICAM1|IGF1R|IL6|MCL1|NOS1|NOS2|PIK3CA|PIK3R1|MAPK1|MAPK3|SLC9A1|VDR|XBP1|NR1H4|SIRT1	-11.4129	-13.0748	10.7396
GO:0097193	GO Biological Processes	19	intrinsic apoptotic signaling pathway	-13.0577	13.3739	13.6213	30169	159	227	16	7.04846	1.69888	25|472|596|598|624|836|1545|2033|3265|3717|4170|5295|7124|7132|11200|23411	ABL1|ATM|BCL2|BCL2L1|BDKRB2|CASP3|CYP1B1|EP300|HRAS|JAK2|MCL1|PIK3R1|TNF|TNFRSF1A|CHEK2|SIRT1	-11.3971	-21.1895	20.3046
GO:0007586	GO Biological Processes	19	digestion	-13.0306	17.2282	14.7104	30169	108	227	14	6.1674	1.59667	887|949|1131|2168|2169|3274|5644|6523|7099|7421|29881|51738|54106|64127	CCKBR|SCARB1|CHRM3|FABP1|FABP2|HRH2|PRSS1|SLC5A1|TLR4|VDR|NPC1L1|GHRL|TLR9|NOD2	-11.3726	-13.9122	28.4792
GO:0046718	GO Biological Processes	19	viral entry into host cell	-13.0306	17.2282	14.7104	30169	108	227	14	6.1674	1.59667	185|290|949|983|1234|1508|1803|1956|3356|3383|3685|3688|3695|7852	AGTR1|ANPEP|SCARB1|CDK1|CCR5|CTSB|DPP4|EGFR|HTR2A|ICAM1|ITGAV|ITGB1|ITGB7|CXCR4	-11.3726	-15.007	30.6699
GO:0090218	GO Biological Processes	19	positive regulation of lipid kinase activity	-12.9909	36.9175	18.7751	30169	36	227	10	4.40529	1.36204	2147|2185|2247|2321|3815|5156|5159|5747|6714|64127	F2|PTK2B|FGF2|FLT1|KIT|PDGFRA|PDGFRB|PTK2|SRC|NOD2	-11.3343	-17.9628	37.9723
GO:0051960	GO Biological Processes	19	regulation of nervous system development	-12.9755	6.9949	11.2315	30169	456	227	24	10.5727	2.04087	207|673|1636|1890|2146|2147|2247|2475|3065|3066|3091|3553|3569|3572|3688|3815|4311|4988|5604|6469|7124|7422|7852|51738	AKT1|BRAF|ACE|TYMP|EZH2|F2|FGF2|MTOR|HDAC1|HDAC2|HIF1A|IL1B|IL6|IL6ST|ITGB1|KIT|MME|OPRM1|MAP2K1|SHH|TNF|VEGFA|CXCR4|GHRL	-11.32	-18.317	26.5806
GO:0097191	GO Biological Processes	19	extrinsic apoptotic signaling pathway	-12.9737	17.0701	14.6347	30169	109	227	14	6.1674	1.59667	596|598|841|1612|2932|3553|3558|3685|3717|4170|5170|5295|7124|7132	BCL2|BCL2L1|CASP8|DAPK1|GSK3B|IL1B|IL2|ITGAV|JAK2|MCL1|PDPK1|PIK3R1|TNF|TNFRSF1A	-11.3196	-12.9737	27.3624
GO:0071453	GO Biological Processes	19	cellular response to oxygen levels	-12.9722	13.2078	13.5231	30169	161	227	16	7.04846	1.69888	207|596|890|2034|2168|2475|3091|4193|5467|5468|5743|6548|6714|7015|7422|23411	AKT1|BCL2|CCNA2|EPAS1|FABP1|MTOR|HIF1A|MDM2|PPARD|PPARG|PTGS2|SLC9A1|SRC|TERT|VEGFA|SIRT1	-11.3193	-30.5084	15.443
GO:0014910	GO Biological Processes	19	regulation of smooth muscle cell migration	-12.9593	19.8591	15.3381	30169	87	227	13	5.72687	1.5422	596|1545|1636|3486|3488|5054|5159|5467|6198|6714|6869|7015|7099	BCL2|CYP1B1|ACE|IGFBP3|IGFBP5|SERPINE1|PDGFRB|PPARD|RPS6KB1|SRC|TACR1|TERT|TLR4	-11.3077	-12.9593	27.6881
GO:0008217	GO Biological Processes	19	regulation of blood pressure	-12.9561	11.8291	13.0723	30169	191	227	17	7.48899	1.74701	134|185|290|367|623|1636|1909|1910|2149|4842|4843|5468|5742|5743|6446|6869|7124	ADORA1|AGTR1|ANPEP|AR|BDKRB1|ACE|EDNRA|EDNRB|F2R|NOS1|NOS2|PPARG|PTGS1|PTGS2|SGK1|TACR1|TNF	-11.3057	-26.7148	28.1916
GO:0048638	GO Biological Processes	19	regulation of developmental growth	-12.9368	8.40652	11.8155	30169	332	227	21	9.2511	1.92311	25|207|367|596|983|1019|1432|2247|2539|2735|2932|5290|5467|6198|6774|6777|7046|7048|7422|7852|51738	ABL1|AKT1|AR|BCL2|CDK1|CDK4|MAPK14|FGF2|G6PD|GLI1|GSK3B|PIK3CA|PPARD|RPS6KB1|STAT3|STAT5B|TGFBR1|TGFBR2|VEGFA|CXCR4|GHRL	-11.2878	-12.9368	17.7204
GO:1904035	GO Biological Processes	19	regulation of epithelial cell apoptotic process	-12.9175	16.9149	14.5599	30169	110	227	14	6.1674	1.59667	25|596|673|2099|3383|3480|3569|3717|3791|5054|5170|5319|7015|7124	ABL1|BCL2|BRAF|ESR1|ICAM1|IGF1R|IL6|JAK2|KDR|SERPINE1|PDPK1|PLA2G1B|TERT|TNF	-11.2696	-12.9175	26.5806
GO:1900180	GO Biological Processes	19	regulation of protein localization to nucleus	-12.9136	14.767	13.9587	30169	135	227	15	6.60793	1.64883	142|207|983|1432|2147|2932|3320|3717|5295|5347|5743|6469|6714|7015|8841	PARP1|AKT1|CDK1|MAPK14|F2|GSK3B|HSP90AA1|JAK2|PIK3R1|PLK1|PTGS2|SHH|SRC|TERT|HDAC3	-11.267	-22.1473	26.5806
GO:0043550	GO Biological Processes	19	regulation of lipid kinase activity	-12.9082	23.4535	16.1396	30169	68	227	12	5.28634	1.48515	887|2147|2185|2247|2321|3815|5156|5159|5295|5747|6714|64127	CCKBR|F2|PTK2B|FGF2|FLT1|KIT|PDGFRA|PDGFRB|PIK3R1|PTK2|SRC|NOD2	-11.2641	-17.9628	37.9723
GO:0070301	GO Biological Processes	19	cellular response to hydrogen peroxide	-12.9082	23.4535	16.1396	30169	68	227	12	5.28634	1.48515	25|383|983|1545|2146|2168|3066|3569|6714|6778|11035|23411	ABL1|ARG1|CDK1|CYP1B1|EZH2|FABP1|HDAC2|IL6|SRC|STAT6|RIPK3|SIRT1	-11.2641	-39.0928	24.7785
GO:0090068	GO Biological Processes	19	positive regulation of cell cycle process	-12.8638	9.71215	12.2845	30169	260	227	19	8.37004	1.8381	207|595|891|894|983|1019|1543|1956|2146|2735|3480|3553|4193|5159|6790|7015|7124|11200|23476	AKT1|CCND1|CCNB1|CCND2|CDK1|CDK4|CYP1A1|EGFR|EZH2|GLI1|IGF1R|IL1B|MDM2|PDGFRB|AURKA|TERT|TNF|CHEK2|BRD4	-11.2209	-15.1858	23.7327
GO:0032651	GO Biological Processes	19	regulation of interleukin-1 beta production	-12.8618	16.7626	14.4862	30169	111	227	14	6.1674	1.59667	834|841|2149|2950|3569|3717|6774|7099|7124|10392|10892|51738|64127|114548	CASP1|CASP8|F2R|GSTP1|IL6|JAK2|STAT3|TLR4|TNF|NOD1|MALT1|GHRL|NOD2|NLRP3	-11.2202	-25.3768	31.6436
GO:0040013	GO Biological Processes	19	negative regulation of locomotion	-12.8305	7.2954	11.2988	30169	419	227	23	10.1322	2.00281	134|207|596|673|1545|1803|1991|2247|3065|3066|3486|3488|4282|5054|5467|5468|5734|5879|6469|6480|6774|7124|51738	ADORA1|AKT1|BCL2|BRAF|CYP1B1|DPP4|ELANE|FGF2|HDAC1|HDAC2|IGFBP3|IGFBP5|MIF|SERPINE1|PPARD|PPARG|PTGER4|RAC1|SHH|ST6GAL1|STAT3|TNF|GHRL	-11.1901	-12.8305	12.0821
GO:0048754	GO Biological Processes	19	branching morphogenesis of an epithelial tube	-12.8182	14.5514	13.842	30169	137	227	15	6.60793	1.64883	367|596|1909|2099|2246|2247|3791|4233|4323|5241|6469|6714|7048|7421|7422	AR|BCL2|EDNRA|ESR1|FGF1|FGF2|KDR|MET|MMP14|PGR|SHH|SRC|TGFBR2|VDR|VEGFA	-11.1803	-17.1966	14.5514
GO:0071456	GO Biological Processes	19	cellular response to hypoxia	-12.8182	14.5514	13.842	30169	137	227	15	6.60793	1.64883	596|890|2034|2168|2475|3091|4193|5467|5468|5743|6548|6714|7015|7422|23411	BCL2|CCNA2|EPAS1|FABP1|MTOR|HIF1A|MDM2|PPARD|PPARG|PTGS2|SLC9A1|SRC|TERT|VEGFA|SIRT1	-11.1803	-30.5084	15.443
GO:0031331	GO Biological Processes	19	positive regulation of cellular catabolic process	-12.8089	7.27803	11.2813	30169	420	227	23	10.1322	2.00281	207|472|1612|2168|2185|2475|2932|3091|3356|3553|3569|3791|4193|5347|5595|5747|6790|7124|8517|10392|23411|54106|64127	AKT1|ATM|DAPK1|FABP1|PTK2B|MTOR|GSK3B|HIF1A|HTR2A|IL1B|IL6|KDR|MDM2|PLK1|MAPK3|PTK2|AURKA|TNF|IKBKG|NOD1|SIRT1|TLR9|NOD2	-11.1721	-18.0996	12.4043
GO:0044000	GO Biological Processes	19	movement in host	-12.7711	14.446	13.7846	30169	138	227	15	6.60793	1.64883	185|290|949|983|1234|1508|1803|1956|3356|3383|3685|3688|3695|6714|7852	AGTR1|ANPEP|SCARB1|CDK1|CCR5|CTSB|DPP4|EGFR|HTR2A|ICAM1|ITGAV|ITGB1|ITGB7|SRC|CXCR4	-11.1356	-15.007	30.6699
GO:0010594	GO Biological Processes	19	regulation of endothelial cell migration	-12.7211	10.4011	12.4615	30169	230	227	18	7.92952	1.79337	25|207|949|2185|2246|2247|2260|3091|3791|4233|5170|5468|5743|5747|5879|7124|7422|23411	ABL1|AKT1|SCARB1|PTK2B|FGF1|FGF2|FGFR1|HIF1A|KDR|MET|PDPK1|PPARG|PTGS2|PTK2|RAC1|TNF|VEGFA|SIRT1	-11.0868	-27.9533	17.7204
GO:0048146	GO Biological Processes	19	positive regulation of fibroblast proliferation	-12.703	27.5837	16.8655	30169	53	227	11	4.84581	1.42523	25|890|891|1019|1956|2099|3265|4282|5156|5159|5319	ABL1|CCNA2|CCNB1|CDK4|EGFR|ESR1|HRAS|MIF|PDGFRA|PDGFRB|PLA2G1B	-11.0699	-17.9628	37.9723
GO:0002819	GO Biological Processes	19	regulation of adaptive immune response	-12.6988	11.4109	12.7972	30169	198	227	17	7.48899	1.74701	196|383|3105|3123|3553|3558|3569|3572|3717|3718|6778|7124|10892|11035|23411|64127|114548	AHR|ARG1|HLA-A|HLA-DRB1|IL1B|IL2|IL6|IL6ST|JAK2|JAK3|STAT6|TNF|MALT1|RIPK3|SIRT1|NOD2|NLRP3	-11.067	-28.2991	25.5583
GO:2000379	GO Biological Processes	19	positive regulation of reactive oxygen species metabolic process	-12.6718	22.4625	15.7647	30169	71	227	12	5.28634	1.48515	185|1432|1545|2147|2185|2950|5159|6850|7048|7099|7498|11035	AGTR1|MAPK14|CYP1B1|F2|PTK2B|GSTP1|PDGFRB|SYK|TGFBR2|TLR4|XDH|RIPK3	-11.0411	-17.3677	22.4625
GO:0001938	GO Biological Processes	19	positive regulation of endothelial cell proliferation	-12.6446	16.1795	14.2004	30169	115	227	14	6.1674	1.59667	185|207|383|2152|2247|2260|3091|3791|5170|6774|7046|7422|23411|51738	AGTR1|AKT1|ARG1|F3|FGF2|FGFR1|HIF1A|KDR|PDPK1|STAT3|TGFBR1|VEGFA|SIRT1|GHRL	-11.0151	-27.9533	17.7204
GO:0009896	GO Biological Processes	19	positive regulation of catabolic process	-12.6407	6.40188	10.8084	30169	519	227	25	11.0132	2.07782	134|207|472|1612|2168|2185|2475|2932|3091|3320|3356|3553|3569|3791|4193|5347|5595|5747|6790|7124|8517|10392|23411|54106|64127	ADORA1|AKT1|ATM|DAPK1|FABP1|PTK2B|MTOR|GSK3B|HIF1A|HSP90AA1|HTR2A|IL1B|IL6|KDR|MDM2|PLK1|MAPK3|PTK2|AURKA|TNF|IKBKG|NOD1|SIRT1|TLR9|NOD2	-11.0124	-18.0996	12.4043
GO:0051924	GO Biological Processes	19	regulation of calcium ion transport	-12.6277	9.42223	12.0586	30169	268	227	19	8.37004	1.8381	25|596|623|1394|1636|2147|2149|2185|2539|3718|4638|4842|5159|5170|5319|5743|6548|7852|54106	ABL1|BCL2|BDKRB1|CRHR1|ACE|F2|F2R|PTK2B|G6PD|JAK3|MYLK|NOS1|PDGFRB|PDPK1|PLA2G1B|PTGS2|SLC9A1|CXCR4|TLR9	-11.0006	-19.6206	16.2077
GO:2001056	GO Biological Processes	19	positive regulation of cysteine-type endopeptidase activity	-12.5412	13.9409	13.5061	30169	143	227	15	6.60793	1.64883	834|841|1509|1612|2149|2152|3717|5468|6850|7124|7498|10392|10892|23411|114548	CASP1|CASP8|CTSD|DAPK1|F2R|F3|JAK2|PPARG|SYK|TNF|XDH|NOD1|MALT1|SIRT1|NLRP3	-10.9154	-26.7434	15.9484
GO:0044772	GO Biological Processes	19	mitotic cell cycle phase transition	-12.5225	12.3631	13.0127	30169	172	227	16	7.04846	1.69888	595|596|890|891|894|983|1017|1019|2146|3688|5243|5347|6198|6790|11200|23476	CCND1|BCL2|CCNA2|CCNB1|CCND2|CDK1|CDK2|CDK4|EZH2|ITGB1|ABCB1|PLK1|RPS6KB1|AURKA|CHEK2|BRD4	-10.8978	-15.1858	23.7327
GO:1904645	GO Biological Processes	19	response to amyloid-beta	-12.5129	26.5806	16.5331	30169	55	227	11	4.84581	1.42523	142|2932|3383|3480|4313|4314|4318|4363|7099|7124|7412	PARP1|GSK3B|ICAM1|IGF1R|MMP2|MMP3|MMP9|ABCC1|TLR4|TNF|VCAM1	-10.8894	-12.5129	27.1231
GO:0032732	GO Biological Processes	19	positive regulation of interleukin-1 production	-12.4463	21.5519	15.4122	30169	74	227	12	5.28634	1.48515	834|841|3066|3569|3717|6774|7099|7124|10392|10892|64127|114548	CASP1|CASP8|HDAC2|IL6|JAK2|STAT3|TLR4|TNF|NOD1|MALT1|NOD2|NLRP3	-10.8252	-25.3768	31.6436
GO:0051403	GO Biological Processes	19	stress-activated MAPK cascade	-12.4463	21.5519	15.4122	30169	74	227	12	5.28634	1.48515	1432|3551|3553|4790|5594|5595|5599|5734|7099|7124|10392|64127	MAPK14|IKBKB|IL1B|NFKB1|MAPK1|MAPK3|MAPK8|PTGER4|TLR4|TNF|NOD1|NOD2	-10.8252	-25.5879	31.4135
GO:0010950	GO Biological Processes	19	positive regulation of endopeptidase activity	-12.4442	12.221	12.9249	30169	174	227	16	7.04846	1.69888	834|841|1509|1612|2149|2152|3717|5468|6774|6850|7124|7498|10392|10892|23411|114548	CASP1|CASP8|CTSD|DAPK1|F2R|F3|JAK2|PPARG|STAT3|SYK|TNF|XDH|NOD1|MALT1|SIRT1|NLRP3	-10.8242	-26.7434	15.9484
GO:0043551	GO Biological Processes	19	regulation of phosphatidylinositol 3-kinase activity	-12.4208	26.106	16.3734	30169	56	227	11	4.84581	1.42523	887|2185|2247|2321|3815|5156|5159|5295|5747|6714|64127	CCKBR|PTK2B|FGF2|FLT1|KIT|PDGFRA|PDGFRB|PIK3R1|PTK2|SRC|NOD2	-10.802	-17.9628	37.9723
GO:0042445	GO Biological Processes	19	hormone metabolic process	-12.4171	10.9677	12.4992	30169	206	227	17	7.48899	1.74701	1508|1543|1544|1545|1576|1636|1803|1910|2099|4311|5156|5781|6469|6777|7941|8694|57016	CTSB|CYP1A1|CYP1A2|CYP1B1|CYP3A4|ACE|DPP4|EDNRB|ESR1|MME|PDGFRA|PTPN11|SHH|STAT5B|PLA2G7|DGAT1|AKR1B10	-10.7995	-12.4171	66.4515
GO:0009416	GO Biological Processes	19	response to light stimulus	-12.3723	8.43829	11.5551	30169	315	227	20	8.81057	1.88131	142|207|595|596|673|836|1956|1991|2033|3091|3688|3815|4311|4313|4314|4318|5295|5599|5743|23411	PARP1|AKT1|CCND1|BCL2|BRAF|CASP3|EGFR|ELANE|EP300|HIF1A|ITGB1|KIT|MME|MMP2|MMP3|MMP9|PIK3R1|MAPK8|PTGS2|SIRT1	-10.7558	-19.0999	66.4515
GO:0032675	GO Biological Processes	19	regulation of interleukin-6 production	-12.3669	12.0821	12.8385	30169	176	227	16	7.04846	1.69888	136|2149|3553|3569|4843|5781|6774|6850|7099|7124|7494|9971|10392|51738|54106|64127	ADORA2B|F2R|IL1B|IL6|NOS2|PTPN11|STAT3|SYK|TLR4|TNF|XBP1|NR1H4|NOD1|GHRL|TLR9|NOD2	-10.7516	-25.3768	31.6436
GO:0006974	GO Biological Processes	19	cellular response to DNA damage stimulus	-12.3236	5.19433	10.0725	30169	742	227	29	12.7753	2.21561	25|142|331|472|595|596|598|836|983|1017|1432|2033|2475|4170|4193|4282|5295|5347|5594|5595|5781|6446|7124|7132|7153|8517|11200|23411|23476	ABL1|PARP1|XIAP|ATM|CCND1|BCL2|BCL2L1|CASP3|CDK1|CDK2|MAPK14|EP300|MTOR|MCL1|MDM2|MIF|PIK3R1|PLK1|MAPK1|MAPK3|PTPN11|SGK1|TNF|TNFRSF1A|TOP2A|IKBKG|CHEK2|SIRT1|BRD4	-10.7094	-21.1895	20.3046
GO:1902105	GO Biological Processes	19	regulation of leukocyte differentiation	-12.3213	8.38505	11.5091	30169	317	227	20	8.81057	1.88131	25|673|841|2064|2475|3123|3558|3718|4323|5295|6469|6777|6850|7048|7099|7124|7494|10892|54106|114548	ABL1|BRAF|CASP8|ERBB2|MTOR|HLA-DRB1|IL2|JAK3|MMP14|PIK3R1|SHH|STAT5B|SYK|TGFBR2|TLR4|TNF|XBP1|MALT1|TLR9|NLRP3	-10.7083	-28.2991	25.5583
GO:0030595	GO Biological Processes	19	leukocyte chemotaxis	-12.3202	13.4699	13.2412	30169	148	227	15	6.60793	1.64883	240|1234|1269|1910|2321|3553|3569|3576|3577|3579|3815|4313|5319|6850|7852	ALOX5|CCR5|CNR2|EDNRB|FLT1|IL1B|IL6|CXCL8|CXCR1|CXCR2|KIT|MMP2|PLA2G1B|SYK|CXCR4	-10.7083	-29.6709	15.1889
GO:1901989	GO Biological Processes	19	positive regulation of cell cycle phase transition	-12.2841	15.2512	13.7333	30169	122	227	14	6.1674	1.59667	207|595|891|894|983|1019|1543|1956|2146|2735|4193|7015|11200|23476	AKT1|CCND1|CCNB1|CCND2|CDK1|CDK4|CYP1A1|EGFR|EZH2|GLI1|MDM2|TERT|CHEK2|BRD4	-10.6734	-15.1858	23.7327
GO:0050796	GO Biological Processes	19	regulation of insulin secretion	-12.277	13.3795	13.1898	30169	149	227	15	6.60793	1.64883	240|1080|2645|3091|3123|3172|3553|3569|3717|4843|5467|5781|7124|9971|51738	ALOX5|CFTR|GCK|HIF1A|HLA-DRB1|HNF4A|IL1B|IL6|JAK2|NOS2|PPARD|PTPN11|TNF|NR1H4|GHRL	-10.6674	-26.71	29.534
GO:0032642	GO Biological Processes	19	regulation of chemokine production	-12.2706	17.63	14.3574	30169	98	227	13	5.72687	1.5422	136|1991|2950|3091|3553|3569|4282|6850|7099|7124|9971|54106|64127	ADORA2B|ELANE|GSTP1|HIF1A|IL1B|IL6|MIF|SYK|TLR4|TNF|NR1H4|TLR9|NOD2	-10.6622	-25.3768	31.6436
GO:0050999	GO Biological Processes	19	regulation of nitric-oxide synthase activity	-12.2454	31.6436	17.3034	30169	42	227	10	4.40529	1.36204	207|949|1269|1956|2185|3091|3553|7015|7124|10392	AKT1|SCARB1|CNR2|EGFR|PTK2B|HIF1A|IL1B|TERT|TNF|NOD1	-10.6382	-15.7672	42.2873
GO:0000902	GO Biological Processes	19	cell morphogenesis	-12.238	5.36208	10.1226	30169	694	227	28	12.3348	2.18256	25|367|596|673|836|1432|1909|1956|2033|2064|3320|3480|3685|3688|3695|4233|5295|5747|5781|5879|5979|6446|6469|6714|6790|7421|7422|8399	ABL1|AR|BCL2|BRAF|CASP3|MAPK14|EDNRA|EGFR|EP300|ERBB2|HSP90AA1|IGF1R|ITGAV|ITGB1|ITGB7|MET|PIK3R1|PTK2|PTPN11|RAC1|RET|SGK1|SHH|SRC|AURKA|VDR|VEGFA|PLA2G10	-10.6319	-12.238	7.3835
GO:0010827	GO Biological Processes	19	regulation of glucose transmembrane transport	-12.231	20.7122	15.08	30169	77	227	12	5.28634	1.48515	207|673|1432|1636|1909|3553|5295|5319|5781|6198|7015|7124	AKT1|BRAF|MAPK14|ACE|EDNRA|IL1B|PIK3R1|PLA2G1B|PTPN11|RPS6KB1|TERT|TNF	-10.6272	-12.231	20.7122
GO:1900015	GO Biological Processes	19	regulation of cytokine production involved in inflammatory response	-12.231	20.7122	15.08	30169	77	227	12	5.28634	1.48515	240|1432|2146|2147|3091|3569|4843|6774|7099|7124|8399|64127	ALOX5|MAPK14|EZH2|F2|HIF1A|IL6|NOS2|STAT3|TLR4|TNF|PLA2G10|NOD2	-10.6272	-25.3768	31.6436
GO:0071478	GO Biological Processes	19	cellular response to radiation	-12.2152	11.8136	12.6699	30169	180	227	16	7.04846	1.69888	142|472|598|894|1432|2033|3265|4193|4311|4313|4314|4318|5295|5743|11200|23411	PARP1|ATM|BCL2L1|CCND2|MAPK14|EP300|HRAS|MDM2|MME|MMP2|MMP3|MMP9|PIK3R1|PTGS2|CHEK2|SIRT1	-10.6125	-19.0999	66.4515
GO:0031098	GO Biological Processes	19	stress-activated protein kinase signaling cascade	-12.1613	20.4466	14.9734	30169	78	227	12	5.28634	1.48515	1432|3551|3553|4790|5594|5595|5599|5734|7099|7124|10392|64127	MAPK14|IKBKB|IL1B|NFKB1|MAPK1|MAPK3|MAPK8|PTGER4|TLR4|TNF|NOD1|NOD2	-10.5597	-25.5879	31.4135
GO:0002791	GO Biological Processes	19	regulation of peptide secretion	-12.1408	11.6838	12.5875	30169	182	227	16	7.04846	1.69888	134|240|1080|2645|3091|3123|3172|3553|3569|3717|4843|5467|5781|7124|9971|51738	ADORA1|ALOX5|CFTR|GCK|HIF1A|HLA-DRB1|HNF4A|IL1B|IL6|JAK2|NOS2|PPARD|PTPN11|TNF|NR1H4|GHRL	-10.5415	-26.71	29.534
GO:0044770	GO Biological Processes	19	cell cycle phase transition	-12.1408	11.6838	12.5875	30169	182	227	16	7.04846	1.69888	595|596|890|891|894|983|1017|1019|2146|3688|5243|5347|6198|6790|11200|23476	CCND1|BCL2|CCNA2|CCNB1|CCND2|CDK1|CDK2|CDK4|EZH2|ITGB1|ABCB1|PLK1|RPS6KB1|AURKA|CHEK2|BRD4	-10.5415	-15.1858	23.7327
GO:0002720	GO Biological Processes	19	positive regulation of cytokine production involved in immune response	-12.0926	20.1878	14.8687	30169	79	227	12	5.28634	1.48515	3105|3553|3569|3815|4282|6850|7099|10392|10892|23411|64127|114548	HLA-A|IL1B|IL6|KIT|MIF|SYK|TLR4|NOD1|MALT1|SIRT1|NOD2|NLRP3	-10.4944	-28.2991	25.5583
GO:0048863	GO Biological Processes	19	stem cell differentiation	-12.0673	11.5568	12.5065	30169	184	227	16	7.04846	1.69888	596|1432|1636|1909|1910|2099|2146|2247|3091|3688|3815|5594|5595|5979|6469|6548	BCL2|MAPK14|ACE|EDNRA|EDNRB|ESR1|EZH2|FGF2|HIF1A|ITGB1|KIT|MAPK1|MAPK3|RET|SHH|SLC9A1	-10.4713	-12.0673	33.2258
GO:0090087	GO Biological Processes	19	regulation of peptide transport	-12.0673	11.5568	12.5065	30169	184	227	16	7.04846	1.69888	134|240|1080|2645|3091|3123|3172|3553|3569|3717|4843|5467|5781|7124|9971|51738	ADORA1|ALOX5|CFTR|GCK|HIF1A|HLA-DRB1|HNF4A|IL1B|IL6|JAK2|NOS2|PPARD|PTPN11|TNF|NR1H4|GHRL	-10.4713	-26.71	29.534
GO:0006869	GO Biological Processes	19	lipid transport	-12.0474	8.10385	11.2634	30169	328	227	20	8.81057	1.88131	624|949|1080|1636|2168|2169|4363|4843|5243|5319|5320|5467|5468|5743|6198|6555|8399|9429|29881|51738	BDKRB2|SCARB1|CFTR|ACE|FABP1|FABP2|ABCC1|NOS2|ABCB1|PLA2G1B|PLA2G2A|PPARD|PPARG|PTGS2|RPS6KB1|SLC10A2|PLA2G10|ABCG2|NPC1L1|GHRL	-10.4525	-15.1054	31.0107
GO:0002688	GO Biological Processes	19	regulation of leukocyte chemotaxis	-12.0404	14.6507	13.4227	30169	127	227	14	6.1674	1.59667	1803|2185|3569|3576|3579|4282|5054|5594|5595|5747|5879|7422|7941|64127	DPP4|PTK2B|IL6|CXCL8|CXCR2|MIF|SERPINE1|MAPK1|MAPK3|PTK2|RAC1|VEGFA|PLA2G7|NOD2	-10.4467	-23.5059	20.0608
GO:1901215	GO Biological Processes	19	negative regulation of neuron death	-12.0169	10.364	12.0818	30169	218	227	17	7.48899	1.74701	207|595|596|598|673|2149|2185|2932|3091|3265|3572|3717|3791|5290|7015|8517|23411	AKT1|CCND1|BCL2|BCL2L1|BRAF|F2R|PTK2B|GSK3B|HIF1A|HRAS|IL6ST|JAK2|KDR|PIK3CA|TERT|IKBKG|SIRT1	-10.4242	-20.7071	12.8026
GO:0006109	GO Biological Processes	19	regulation of carbohydrate metabolic process	-11.9947	11.4325	12.4267	30169	186	227	16	7.04846	1.69888	207|2033|2185|2475|2645|2908|2932|3091|3356|3486|3487|4790|6097|6714|6774|23411	AKT1|EP300|PTK2B|MTOR|GCK|NR3C1|GSK3B|HIF1A|HTR2A|IGFBP3|IGFBP4|NFKB1|RORC|SRC|STAT3|SIRT1	-10.4031	-11.9947	30.2052
GO:0060135	GO Biological Processes	19	maternal process involved in female pregnancy	-11.9867	23.9661	15.6335	30169	61	227	11	4.84581	1.42523	142|207|367|383|1508|2099|5241|5467|5743|7421|51738	PARP1|AKT1|AR|ARG1|CTSB|ESR1|PGR|PPARD|PTGS2|VDR|GHRL	-10.3962	-20.2052	31.8967
GO:0009746	GO Biological Processes	19	response to hexose	-11.9833	12.7791	12.843	30169	156	227	15	6.60793	1.64883	836|1636|2185|2645|3091|3172|3383|3480|5290|5467|5743|6198|7048|7124|7494	CASP3|ACE|PTK2B|GCK|HIF1A|HNF4A|ICAM1|IGF1R|PIK3CA|PPARD|PTGS2|RPS6KB1|TGFBR2|TNF|XBP1	-10.394	-13.44	12.7791
GO:0060396	GO Biological Processes	19	growth hormone receptor signaling pathway	-11.9755	53.1612	20.3176	30169	20	227	8	3.52423	1.22385	3716|3717|3718|5295|5747|6774|6777|6778	JAK1|JAK2|JAK3|PIK3R1|PTK2|STAT3|STAT5B|STAT6	-10.3883	-13.5751	79.7419
GO:0071378	GO Biological Processes	19	cellular response to growth hormone stimulus	-11.9755	53.1612	20.3176	30169	20	227	8	3.52423	1.22385	3716|3717|3718|5295|5747|6774|6777|6778	JAK1|JAK2|JAK3|PIK3R1|PTK2|STAT3|STAT5B|STAT6	-10.3883	-13.5751	79.7419
GO:0010638	GO Biological Processes	19	positive regulation of organelle organization	-11.9699	6.27889	10.4479	30169	508	227	24	10.5727	2.04087	25|472|673|1017|1786|2185|2475|2932|3091|3265|3553|3791|4233|4318|5159|5594|5595|5599|5879|6714|6790|6869|7046|7124	ABL1|ATM|BRAF|CDK2|DNMT1|PTK2B|MTOR|GSK3B|HIF1A|HRAS|IL1B|KDR|MET|MMP9|PDGFRB|MAPK1|MAPK3|MAPK8|RAC1|SRC|AURKA|TACR1|TGFBR1|TNF	-10.3838	-13.9473	22.9143
GO:0008202	GO Biological Processes	19	steroid metabolic process	-11.9277	9.34475	11.6748	30169	256	227	18	7.92952	1.79337	949|1080|1543|1544|1545|1557|1576|1910|2099|2539|2908|5156|5467|6469|6777|8856|9971|29881	SCARB1|CFTR|CYP1A1|CYP1A2|CYP1B1|CYP2C19|CYP3A4|EDNRB|ESR1|G6PD|NR3C1|PDGFRA|PPARD|SHH|STAT5B|NR1I2|NR1H4|NPC1L1	-10.3437	-12.4171	66.4515
GO:0090257	GO Biological Processes	19	regulation of muscle system process	-11.9277	9.34475	11.6748	30169	256	227	18	7.92952	1.79337	134|136|142|1131|2149|2539|3320|3488|3572|3815|4842|5468|5743|6198|6548|6869|7132|51738	ADORA1|ADORA2B|PARP1|CHRM3|F2R|G6PD|HSP90AA1|IGFBP5|IL6ST|KIT|NOS1|PPARG|PTGS2|RPS6KB1|SLC9A1|TACR1|TNFRSF1A|GHRL	-10.3437	-11.9277	25.7232
GO:0001822	GO Biological Processes	19	kidney development	-11.9125	8.58897	11.3854	30169	294	227	19	8.37004	1.8381	185|596|1636|1909|1910|2246|2247|3248|3579|4311|4953|5156|5159|5915|5979|6469|6772|7046|7422	AGTR1|BCL2|ACE|EDNRA|EDNRB|FGF1|FGF2|HPGD|CXCR2|MME|ODC1|PDGFRA|PDGFRB|RARB|RET|SHH|STAT1|TGFBR1|VEGFA	-10.3297	-14.6196	49.8387
GO:0050767	GO Biological Processes	19	regulation of neurogenesis	-11.8721	7.40309	10.8932	30169	377	227	21	9.2511	1.92311	673|1636|2146|2147|2247|2475|3065|3066|3091|3553|3569|3572|3688|3815|4311|4988|5604|6469|7124|7422|7852	BRAF|ACE|EZH2|F2|FGF2|MTOR|HDAC1|HDAC2|HIF1A|IL1B|IL6|IL6ST|ITGB1|KIT|MME|OPRM1|MAP2K1|SHH|TNF|VEGFA|CXCR4	-10.2903	-18.317	26.5806
GO:0007423	GO Biological Processes	19	sensory organ development	-11.8618	5.90156	10.2222	30169	563	227	25	11.0132	2.07782	596|890|1543|1545|1909|1956|2247|2321|3065|3066|3091|3791|3815|5156|5159|5594|5595|5781|5915|5979|6469|6774|7046|7048|7422	BCL2|CCNA2|CYP1A1|CYP1B1|EDNRA|EGFR|FGF2|FLT1|HDAC1|HDAC2|HIF1A|KDR|KIT|PDGFRA|PDGFRB|MAPK1|MAPK3|PTPN11|RARB|RET|SHH|STAT3|TGFBR1|TGFBR2|VEGFA	-10.2811	-17.1338	20.1368
GO:0032731	GO Biological Processes	19	positive regulation of interleukin-1 beta production	-11.8242	23.2053	15.3619	30169	63	227	11	4.84581	1.42523	834|841|3569|3717|6774|7099|7124|10392|10892|64127|114548	CASP1|CASP8|IL6|JAK2|STAT3|TLR4|TNF|NOD1|MALT1|NOD2|NLRP3	-10.2446	-25.3768	31.6436
GO:0009743	GO Biological Processes	19	response to carbohydrate	-11.817	11.1332	12.2323	30169	191	227	16	7.04846	1.69888	836|1636|2185|2645|3091|3172|3383|3480|3553|5290|5467|5743|6198|7048|7124|7494	CASP3|ACE|PTK2B|GCK|HIF1A|HNF4A|ICAM1|IGF1R|IL1B|PIK3CA|PPARD|PTGS2|RPS6KB1|TGFBR2|TNF|XBP1	-10.2384	-13.44	12.7791
GO:0032770	GO Biological Processes	19	positive regulation of monooxygenase activity	-11.7983	37.379	17.9276	30169	32	227	9	3.96476	1.29512	207|949|2185|3091|3553|7015|7124|7421|10392	AKT1|SCARB1|PTK2B|HIF1A|IL1B|TERT|TNF|VDR|NOD1	-10.2219	-15.7672	42.2873
GO:0043552	GO Biological Processes	19	positive regulation of phosphatidylinositol 3-kinase activity	-11.7983	37.379	17.9276	30169	32	227	9	3.96476	1.29512	2185|2247|2321|3815|5156|5159|5747|6714|64127	PTK2B|FGF2|FLT1|KIT|PDGFRA|PDGFRB|PTK2|SRC|NOD2	-10.2219	-17.9628	37.9723
GO:0001101	GO Biological Processes	19	response to acid chemical	-11.7619	13.9898	13.0723	30169	133	227	14	6.1674	1.59667	383|598|836|1786|1956|2475|3480|4313|5156|5290|6198|7124|7422|7494	ARG1|BCL2L1|CASP3|DNMT1|EGFR|MTOR|IGF1R|MMP2|PDGFRA|PIK3CA|RPS6KB1|TNF|VEGFA|XBP1	-10.1865	-11.7619	14.9329
GO:0019229	GO Biological Processes	19	regulation of vasoconstriction	-11.7452	22.8427	15.2308	30169	64	227	11	4.84581	1.42523	25|185|624|1131|1636|2149|3274|3356|4313|5743|6869	ABL1|AGTR1|BDKRB2|CHRM3|ACE|F2R|HRH2|HTR2A|MMP2|PTGS2|TACR1	-10.1709	-26.7148	28.1916
GO:1901615	GO Biological Processes	19	organic hydroxy compound metabolic process	-11.7424	6.46252	10.4261	30169	473	227	23	10.1322	2.00281	217|249|596|949|1080|1508|1543|1544|1545|1576|1909|1910|2034|2247|2539|3091|3417|5467|8694|9971|10327|29881|57016	ALDH2|ALPL|BCL2|SCARB1|CFTR|CTSB|CYP1A1|CYP1A2|CYP1B1|CYP3A4|EDNRA|EDNRB|EPAS1|FGF2|G6PD|HIF1A|IDH1|PPARD|DGAT1|NR1H4|AKR1A1|NPC1L1|AKR1B10	-10.1692	-12.4171	66.4515
GO:0033138	GO Biological Processes	19	positive regulation of peptidyl-serine phosphorylation	-11.7159	15.9976	13.5949	30169	108	227	13	5.72687	1.5422	207|596|673|1956|3320|3569|4282|4842|5290|5743|5979|7124|7422	AKT1|BCL2|BRAF|EGFR|HSP90AA1|IL6|MIF|NOS1|PIK3CA|PTGS2|RET|TNF|VEGFA	-10.1437	-11.7159	15.9976
GO:0046677	GO Biological Processes	19	response to antibiotic	-11.7133	28.2773	16.295	30169	47	227	10	4.40529	1.36204	249|836|841|1543|2146|3320|3716|3717|4193|6548	ALPL|CASP3|CASP8|CYP1A1|EZH2|HSP90AA1|JAK1|JAK2|MDM2|SLC9A1	-10.1427	-11.7133	28.4792
GO:0010952	GO Biological Processes	19	positive regulation of peptidase activity	-11.7128	10.9611	12.1192	30169	194	227	16	7.04846	1.69888	834|841|1509|1612|2149|2152|3717|5468|6774|6850|7124|7498|10392|10892|23411|114548	CASP1|CASP8|CTSD|DAPK1|F2R|F3|JAK2|PPARG|STAT3|SYK|TNF|XDH|NOD1|MALT1|SIRT1|NLRP3	-10.1427	-26.7434	15.9484
GO:0071241	GO Biological Processes	19	cellular response to inorganic substance	-11.702	9.90944	11.7579	30169	228	227	17	7.48899	1.74701	142|207|673|890|1017|1147|1543|1544|1956|4314|4318|5594|5595|5599|5743|6469|54106	PARP1|AKT1|BRAF|CCNA2|CDK2|CHUK|CYP1A1|CYP1A2|EGFR|MMP3|MMP9|MAPK1|MAPK3|MAPK8|PTGS2|SHH|TLR9	-10.1329	-17.3351	28.7358
GO:0072001	GO Biological Processes	19	renal system development	-11.6817	8.33386	11.1715	30169	303	227	19	8.37004	1.8381	185|596|1636|1909|1910|2246|2247|3248|3579|4311|4953|5156|5159|5915|5979|6469|6772|7046|7422	AGTR1|BCL2|ACE|EDNRA|EDNRB|FGF1|FGF2|HPGD|CXCR2|MME|ODC1|PDGFRA|PDGFRB|RARB|RET|SHH|STAT1|TGFBR1|VEGFA	-10.1136	-14.6196	49.8387
GO:0031100	GO Biological Processes	19	animal organ regeneration	-11.6675	22.4913	15.1026	30169	65	227	11	4.84581	1.42523	595|890|983|1636|2146|2735|3569|6790|7048|7124|7298	CCND1|CCNA2|CDK1|ACE|EZH2|GLI1|IL6|AURKA|TGFBR2|TNF|TYMS	-10.1005	-11.6675	32.0801
GO:0034284	GO Biological Processes	19	response to monosaccharide	-11.6653	12.1558	12.473	30169	164	227	15	6.60793	1.64883	836|1636|2185|2645|3091|3172|3383|3480|5290|5467|5743|6198|7048|7124|7494	CASP3|ACE|PTK2B|GCK|HIF1A|HNF4A|ICAM1|IGF1R|PIK3CA|PPARD|PTGS2|RPS6KB1|TGFBR2|TNF|XBP1	-10.0994	-13.44	12.7791
GO:0006936	GO Biological Processes	19	muscle contraction	-11.6409	9.82327	11.6956	30169	230	227	17	7.48899	1.74701	624|1131|1909|1910|2475|2548|3320|3356|4638|4842|5290|5733|6198|6548|6869|7124|7852	BDKRB2|CHRM3|EDNRA|EDNRB|MTOR|GAA|HSP90AA1|HTR2A|MYLK|NOS1|PIK3CA|PTGER3|RPS6KB1|SLC9A1|TACR1|TNF|CXCR4	-10.0759	-26.7148	28.1916
GO:0061138	GO Biological Processes	19	morphogenesis of a branching epithelium	-11.6268	12.0821	12.4285	30169	165	227	15	6.60793	1.64883	367|596|1909|2099|2246|2247|3791|4233|4323|5241|6469|6714|7048|7421|7422	AR|BCL2|EDNRA|ESR1|FGF1|FGF2|KDR|MET|MMP14|PGR|SHH|SRC|TGFBR2|VDR|VEGFA	-10.0629	-17.1966	14.5514
GO:0002673	GO Biological Processes	19	regulation of acute inflammatory response	-11.6147	27.6881	16.112	30169	48	227	10	4.40529	1.36204	134|1910|2950|3553|3569|3572|5733|5743|7124|114548	ADORA1|EDNRB|GSTP1|IL1B|IL6|IL6ST|PTGER3|PTGS2|TNF|NLRP3	-10.0528	-11.6147	75.9446
GO:0048538	GO Biological Processes	19	thymus development	-11.6147	27.6881	16.112	30169	48	227	10	4.40529	1.36204	25|472|596|673|5594|5595|5604|6469|7046|11035	ABL1|ATM|BCL2|BRAF|MAPK1|MAPK3|MAP2K1|SHH|TGFBR1|RIPK3	-10.0528	-40.3519	27.6881
GO:0051769	GO Biological Processes	19	regulation of nitric-oxide synthase biosynthetic process	-11.5766	48.3284	19.3356	30169	22	227	8	3.52423	1.22385	2950|3717|3718|3791|6772|7099|54106|64127	GSTP1|JAK2|JAK3|KDR|STAT1|TLR4|TLR9|NOD2	-10.0163	-11.5766	51.6845
GO:0048145	GO Biological Processes	19	regulation of fibroblast proliferation	-11.576	18.3315	14.0957	30169	87	227	12	5.28634	1.48515	25|890|891|1019|1956|2099|2950|3265|4282|5156|5159|5319	ABL1|CCNA2|CCNB1|CDK4|EGFR|ESR1|GSTP1|HRAS|MIF|PDGFRA|PDGFRB|PLA2G1B	-10.0163	-17.9628	37.9723
GO:0007162	GO Biological Processes	19	negative regulation of cell adhesion	-11.5568	8.19857	11.0564	30169	308	227	19	8.37004	1.8381	25|207|383|836|1545|2064|3123|3558|3717|3718|4313|4323|5054|5295|5747|5781|6469|6714|7422	ABL1|AKT1|ARG1|CASP3|CYP1B1|ERBB2|HLA-DRB1|IL2|JAK2|JAK3|MMP2|MMP14|SERPINE1|PIK3R1|PTK2|PTPN11|SHH|SRC|VEGFA	-9.99806	-11.5568	33.2258
GO:0046661	GO Biological Processes	19	male sex differentiation	-11.5506	11.9374	12.3408	30169	167	227	15	6.60793	1.64883	367|595|596|598|1545|1636|2099|3815|4323|5156|5159|6469|6777|7046|54106	AR|CCND1|BCL2|BCL2L1|CYP1B1|ACE|ESR1|KIT|MMP14|PDGFRA|PDGFRB|SHH|STAT5B|TGFBR1|TLR9	-9.99283	-20.0267	24.6117
GO:0035094	GO Biological Processes	19	response to nicotine	-11.5184	27.1231	15.9346	30169	49	227	10	4.40529	1.36204	596|836|3066|3480|4313|4790|5594|6869|7124|7412	BCL2|CASP3|HDAC2|IGF1R|MMP2|NFKB1|MAPK1|TACR1|TNF|VCAM1	-9.96164	-12.5129	27.1231
GO:0032147	GO Biological Processes	19	activation of protein kinase activity	-11.4971	13.3859	12.7439	30169	139	227	14	6.1674	1.59667	25|1956|2185|2246|2475|3717|5170|5290|5604|6714|7048|7422|10892|11035	ABL1|EGFR|PTK2B|FGF1|MTOR|JAK2|PDPK1|PIK3CA|MAP2K1|SRC|TGFBR2|VEGFA|MALT1|RIPK3	-9.94141	-11.4971	17.1488
GO:0002705	GO Biological Processes	19	positive regulation of leukocyte mediated immunity	-11.4542	13.2903	12.6912	30169	140	227	14	6.1674	1.59667	383|3105|3123|3553|3558|3569|3815|4843|6777|6778|7124|10892|64127|114548	ARG1|HLA-A|HLA-DRB1|IL1B|IL2|IL6|KIT|NOS2|STAT5B|STAT6|TNF|MALT1|NOD2|NLRP3	-9.89954	-28.2991	25.5583
GO:0046632	GO Biological Processes	19	alpha-beta T cell differentiation	-11.4424	21.499	14.7348	30169	68	227	11	4.84581	1.42523	25|596|673|2475|3569|5734|6097|6469|6774|6778|6850	ABL1|BCL2|BRAF|MTOR|IL6|PTGER4|RORC|SHH|STAT3|STAT6|SYK	-9.88872	-11.4424	51.6845
GO:1904707	GO Biological Processes	19	positive regulation of vascular associated smooth muscle cell proliferation	-11.4243	26.5806	15.7624	30169	50	227	10	4.40529	1.36204	1786|2247|3248|3488|3717|4313|4318|6714|7015|7124	DNMT1|FGF2|HPGD|IGFBP5|JAK2|MMP2|MMP9|SRC|TERT|TNF	-9.87162	-25.7384	29.8354
GO:0050890	GO Biological Processes	19	cognition	-11.41	8.04191	10.9218	30169	314	227	19	8.37004	1.8381	25|134|673|836|894|1956|2033|3091|3356|3688|3815|4311|5594|5743|6198|6446|6714|6869|7124	ABL1|ADORA1|BRAF|CASP3|CCND2|EGFR|EP300|HIF1A|HTR2A|ITGB1|KIT|MME|MAPK1|PTGS2|RPS6KB1|SGK1|SRC|TACR1|TNF	-9.85834	-14.7706	49.8387
GO:0070141	GO Biological Processes	19	response to UV-A	-11.3889	66.4515	21.328	30169	14	227	7	3.0837	1.14742	207|595|1956|4311|4313|4314|4318	AKT1|CCND1|EGFR|MME|MMP2|MMP3|MMP9	-9.83824	-19.0999	66.4515
GO:0042063	GO Biological Processes	19	gliogenesis	-11.3732	9.45336	11.4241	30169	239	227	17	7.48899	1.74701	25|207|2064|2185|2247|2475|3065|3553|4323|5594|5595|5604|5781|6469|6774|7099|7124	ABL1|AKT1|ERBB2|PTK2B|FGF2|MTOR|HDAC1|IL1B|MMP14|MAPK1|MAPK3|MAP2K1|PTPN11|SHH|STAT3|TLR4|TNF	-9.82349	-25.5879	31.4135
GO:0042698	GO Biological Processes	19	ovulation cycle	-11.3698	21.1874	14.6173	30169	69	227	11	4.84581	1.42523	836|1545|2099|3480|4313|4988|5156|5241|6714|6777|23411	CASP3|CYP1B1|ESR1|IGF1R|MMP2|OPRM1|PDGFRA|PGR|SRC|STAT5B|SIRT1	-9.82116	-11.3698	39.8709
GO:0051129	GO Biological Processes	19	negative regulation of cellular component organization	-11.346	5.11895	9.60762	30169	701	227	27	11.8943	2.14861	142|207|367|472|598|1636|1803|2033|2932|3066|3551|3553|3685|4233|4323|5290|5295|5347|5468|5734|5879|6714|7124|7132|7153|7422|9971	PARP1|AKT1|AR|ATM|BCL2L1|ACE|DPP4|EP300|GSK3B|HDAC2|IKBKB|IL1B|ITGAV|MET|MMP14|PIK3CA|PIK3R1|PLK1|PPARG|PTGER4|RAC1|SRC|TNF|TNFRSF1A|TOP2A|VEGFA|NR1H4	-9.79834	-11.346	16.1095
GO:0045088	GO Biological Processes	19	regulation of innate immune response	-11.3441	9.41397	11.3948	30169	240	227	17	7.48899	1.74701	142|330|331|383|841|2033|3105|3320|3551|5468|5781|6714|6777|6850|7099|54106|64127	PARP1|BIRC3|XIAP|ARG1|CASP8|EP300|HLA-A|HSP90AA1|IKBKB|PPARG|PTPN11|SRC|STAT5B|SYK|TLR4|TLR9|NOD2	-9.79744	-16.2489	24.1642
GO:0033135	GO Biological Processes	19	regulation of peptidyl-serine phosphorylation	-11.3276	13.0115	12.5361	30169	143	227	14	6.1674	1.59667	207|596|624|673|1956|3320|3569|4282|4842|5290|5743|5979|7124|7422	AKT1|BCL2|BDKRB2|BRAF|EGFR|HSP90AA1|IL6|MIF|NOS1|PIK3CA|PTGS2|RET|TNF|VEGFA	-9.78191	-11.7159	15.9976
GO:1903532	GO Biological Processes	19	positive regulation of secretion by cell	-11.3248	8.60524	11.092	30169	278	227	18	7.92952	1.79337	136|1080|2645|3091|3123|3553|3717|4282|5319|5467|5468|5781|6850|6869|7099|8399|9971|51738	ADORA2B|CFTR|GCK|HIF1A|HLA-DRB1|IL1B|JAK2|MIF|PLA2G1B|PPARD|PPARG|PTPN11|SYK|TACR1|TLR4|PLA2G10|NR1H4|GHRL	-9.78011	-26.71	29.534
GO:0097659	GO Biological Processes	19	nucleic acid-templated transcription	-11.3081	5.56546	9.81017	30169	597	227	25	11.0132	2.07782	142|367|890|1017|1432|1786|2033|2034|2099|2247|3172|3558|3717|4790|5295|5468|5595|6774|6777|7015|7132|7421|7494|9971|23476	PARP1|AR|CCNA2|CDK2|MAPK14|DNMT1|EP300|EPAS1|ESR1|FGF2|HNF4A|IL2|JAK2|NFKB1|PIK3R1|PPARG|MAPK3|STAT3|STAT5B|TERT|TNFRSF1A|VDR|XBP1|NR1H4|BRD4	-9.76439	-11.3081	7.42694
GO:0043627	GO Biological Processes	19	response to estrogen	-11.2985	20.8848	14.5024	30169	70	227	11	4.84581	1.42523	367|595|2033|2099|3320|4311|4313|4323|5159|7048|51738	AR|CCND1|EP300|ESR1|HSP90AA1|MME|MMP2|MMP14|PDGFRB|TGFBR2|GHRL	-9.75571	-11.2985	20.8848
GO:0016032	GO Biological Processes	19	viral process	-11.2865	9.33617	11.3367	30169	242	227	17	7.48899	1.74701	185|290|598|949|983|1234|1508|1803|1956|2932|3356|3383|3685|3688|3695|6480|7852	AGTR1|ANPEP|BCL2L1|SCARB1|CDK1|CCR5|CTSB|DPP4|EGFR|GSK3B|HTR2A|ICAM1|ITGAV|ITGB1|ITGB7|ST6GAL1|CXCR4	-9.74472	-15.007	30.6699
GO:0001763	GO Biological Processes	19	morphogenesis of a branching structure	-11.2555	11.3917	12.0042	30169	175	227	15	6.60793	1.64883	367|596|1909|2099|2246|2247|3791|4233|4323|5241|6469|6714|7048|7421|7422	AR|BCL2|EDNRA|ESR1|FGF1|FGF2|KDR|MET|MMP14|PGR|SHH|SRC|TGFBR2|VDR|VEGFA	-9.71471	-17.1966	14.5514
GO:0006805	GO Biological Processes	19	xenobiotic metabolic process	-11.2159	14.6419	12.928	30169	118	227	13	5.72687	1.5422	196|1543|1544|1545|1557|1576|2950|3172|4363|4842|5243|6097|8856	AHR|CYP1A1|CYP1A2|CYP1B1|CYP2C19|CYP3A4|GSTP1|HNF4A|ABCC1|NOS1|ABCB1|RORC|NR1I2	-9.67706	-31.4217	14.6419
GO:0043200	GO Biological Processes	19	response to amino acid	-11.2159	14.6419	12.928	30169	118	227	13	5.72687	1.5422	383|598|836|1786|1956|2475|3480|4313|5156|5290|6198|7124|7494	ARG1|BCL2L1|CASP3|DNMT1|EGFR|MTOR|IGF1R|MMP2|PDGFRA|PIK3CA|RPS6KB1|TNF|XBP1	-9.67706	-11.7619	14.9329
GO:0061061	GO Biological Processes	19	muscle structure development	-11.1994	6.07708	9.99803	30169	503	227	23	10.1322	2.00281	207|596|836|983|1432|1909|1910|2033|2034|2475|3488|3688|4638|4842|5156|5159|5915|6469|6548|7046|7422|7494|23411	AKT1|BCL2|CASP3|CDK1|MAPK14|EDNRA|EDNRB|EP300|EPAS1|MTOR|IGFBP5|ITGB1|MYLK|NOS1|PDGFRA|PDGFRB|RARB|SHH|SLC9A1|TGFBR1|VEGFA|XBP1|SIRT1	-9.66153	-11.1994	132.903
GO:0032649	GO Biological Processes	19	regulation of interferon-gamma production	-11.1685	14.5188	12.8658	30169	119	227	13	5.72687	1.5422	25|3105|3123|3265|3553|3558|3717|7099|7124|9971|11035|54106|64127	ABL1|HLA-A|HLA-DRB1|HRAS|IL1B|IL2|JAK2|TLR4|TNF|NR1H4|RIPK3|TLR9|NOD2	-9.63163	-25.3768	31.6436
GO:0120254	GO Biological Processes	19	olefinic compound metabolic process	-11.1633	12.6574	12.3364	30169	147	227	14	6.1674	1.59667	240|1543|1544|1545|1557|1576|1910|2950|5742|5743|6777|8399|8694|57016	ALOX5|CYP1A1|CYP1A2|CYP1B1|CYP2C19|CYP3A4|EDNRB|GSTP1|PTGS1|PTGS2|STAT5B|PLA2G10|DGAT1|AKR1B10	-9.62743	-15.2569	25.3149
GO:0008630	GO Biological Processes	19	intrinsic apoptotic signaling pathway in response to DNA damage	-11.1591	20.3046	14.2795	30169	72	227	11	4.84581	1.42523	25|472|596|598|2033|4170|5295|7124|7132|11200|23411	ABL1|ATM|BCL2|BCL2L1|EP300|MCL1|PIK3R1|TNF|TNFRSF1A|CHEK2|SIRT1	-9.62411	-21.1895	20.3046
GO:0032774	GO Biological Processes	19	RNA biosynthetic process	-11.1525	5.47377	9.69497	30169	607	227	25	11.0132	2.07782	142|367|890|1017|1432|1786|2033|2034|2099|2247|3172|3558|3717|4790|5295|5468|5595|6774|6777|7015|7132|7421|7494|9971|23476	PARP1|AR|CCNA2|CDK2|MAPK14|DNMT1|EP300|EPAS1|ESR1|FGF2|HNF4A|IL2|JAK2|NFKB1|PIK3R1|PPARG|MAPK3|STAT3|STAT5B|TERT|TNFRSF1A|VDR|XBP1|NR1H4|BRD4	-9.61849	-11.3081	7.42694
GO:0030336	GO Biological Processes	19	negative regulation of cell migration	-11.134	7.22299	10.4581	30169	368	227	20	8.81057	1.88131	134|207|596|673|1545|1803|2247|3065|3066|3486|3488|4282|5054|5467|5468|5734|5879|6469|6774|7124	ADORA1|AKT1|BCL2|BRAF|CYP1B1|DPP4|FGF2|HDAC1|HDAC2|IGFBP3|IGFBP5|MIF|SERPINE1|PPARD|PPARG|PTGER4|RAC1|SHH|STAT3|TNF	-9.60098	-12.8305	12.0821
GO:0006631	GO Biological Processes	19	fatty acid metabolic process	-11.1259	7.74589	10.6628	30169	326	227	19	8.37004	1.8381	240|1432|1543|1544|1545|1557|1576|2169|2950|3248|4282|5319|5467|5468|5742|5743|7132|7494|8399	ALOX5|MAPK14|CYP1A1|CYP1A2|CYP1B1|CYP2C19|CYP3A4|FABP2|GSTP1|HPGD|MIF|PLA2G1B|PPARD|PPARG|PTGS1|PTGS2|TNFRSF1A|XBP1|PLA2G10	-9.59382	-15.2569	25.3149
GO:0002821	GO Biological Processes	19	positive regulation of adaptive immune response	-11.1216	14.3978	12.8043	30169	120	227	13	5.72687	1.5422	3105|3123|3553|3558|3569|3572|3717|6778|7124|10892|23411|64127|114548	HLA-A|HLA-DRB1|IL1B|IL2|IL6|IL6ST|JAK2|STAT6|TNF|MALT1|SIRT1|NOD2|NLRP3	-9.59144	-28.2991	25.5583
GO:0042752	GO Biological Processes	19	regulation of circadian rhythm	-11.1216	14.3978	12.8043	30169	120	227	13	5.72687	1.5422	134|142|983|2146|2475|2932|3172|5468|5599|6097|7153|8841|51738	ADORA1|PARP1|CDK1|EZH2|MTOR|GSK3B|HNF4A|PPARG|MAPK8|RORC|TOP2A|HDAC3|GHRL	-9.59144	-22.9176	14.3978
GO:0060759	GO Biological Processes	19	regulation of response to cytokine stimulus	-11.1136	11.1371	11.844	30169	179	227	15	6.60793	1.64883	331|383|834|841|2950|3091|3551|3569|5468|5781|6850|7099|7132|7852|9971	XIAP|ARG1|CASP1|CASP8|GSTP1|HIF1A|IKBKB|IL6|PPARG|PTPN11|SYK|TLR4|TNFRSF1A|CXCR4|NR1H4	-9.58535	-11.1136	19.6893
GO:0090276	GO Biological Processes	19	regulation of peptide hormone secretion	-11.1136	11.1371	11.844	30169	179	227	15	6.60793	1.64883	240|1080|2645|3091|3123|3172|3553|3569|3717|4843|5467|5781|7124|9971|51738	ALOX5|CFTR|GCK|HIF1A|HLA-DRB1|HNF4A|IL1B|IL6|JAK2|NOS2|PPARD|PTPN11|TNF|NR1H4|GHRL	-9.58535	-26.71	29.534
GO:0001541	GO Biological Processes	19	ovarian follicle development	-11.0684	24.6117	15.1209	30169	54	227	10	4.40529	1.36204	472|596|598|2099|3791|3815|4313|4323|6714|7422	ATM|BCL2|BCL2L1|ESR1|KDR|KIT|MMP2|MMP14|SRC|VEGFA	-9.5411	-20.0267	24.6117
GO:0001501	GO Biological Processes	19	skeletal system development	-11.0611	5.98194	9.88971	30169	511	227	23	10.1322	2.00281	249|1432|1909|2033|2247|2260|3091|3815|4313|4318|4323|5156|5595|5734|5781|5915|6469|6714|7046|7048|7298|7421|51738	ALPL|MAPK14|EDNRA|EP300|FGF2|FGFR1|HIF1A|KIT|MMP2|MMP9|MMP14|PDGFRA|MAPK3|PTGER4|PTPN11|RARB|SHH|SRC|TGFBR1|TGFBR2|TYMS|VDR|GHRL	-9.5347	-11.0611	9.06157
GO:0071383	GO Biological Processes	19	cellular response to steroid hormone stimulus	-11.0434	12.4043	12.1916	30169	150	227	14	6.1674	1.59667	367|383|1545|1636|2099|2100|2908|3480|3717|5241|5467|6198|6446|6714	AR|ARG1|CYP1B1|ACE|ESR1|ESR2|NR3C1|IGF1R|JAK2|PGR|PPARD|RPS6KB1|SGK1|SRC	-9.51799	-20.0724	75.9446
GO:0002822	GO Biological Processes	19	regulation of adaptive immune response based on somatic recombination of immune receptors built from immunoglobulin superfamily domains	-11.0095	10.9536	11.7272	30169	182	227	15	6.60793	1.64883	196|383|3105|3123|3553|3558|3569|3717|3718|6778|7124|10892|11035|64127|114548	AHR|ARG1|HLA-A|HLA-DRB1|IL1B|IL2|IL6|JAK2|JAK3|STAT6|TNF|MALT1|RIPK3|NOD2|NLRP3	-9.48599	-28.2991	25.5583
GO:0046890	GO Biological Processes	19	regulation of lipid biosynthetic process	-11.0095	10.9536	11.7272	30169	182	227	15	6.60793	1.64883	207|949|1019|2246|2475|2908|3356|3417|3480|3553|4790|5743|7124|9971|23411	AKT1|SCARB1|CDK4|FGF1|MTOR|NR3C1|HTR2A|IDH1|IGF1R|IL1B|NFKB1|PTGS2|TNF|NR1H4|SIRT1	-9.48599	-25.7798	20.7122
GO:0031099	GO Biological Processes	19	regeneration	-11.004	12.3221	12.1443	30169	151	227	14	6.1674	1.59667	595|596|890|983|1636|2146|2735|3569|3717|4313|6790|7048|7124|7298	CCND1|BCL2|CCNA2|CDK1|ACE|EZH2|GLI1|IL6|JAK2|MMP2|AURKA|TGFBR2|TNF|TYMS	-9.48143	-11.6675	32.0801
GO:0046631	GO Biological Processes	19	alpha-beta T cell activation	-11.0006	16.4416	13.263	30169	97	227	12	5.28634	1.48515	25|596|673|2475|3105|3569|5734|6097|6469|6774|6778|6850	ABL1|BCL2|BRAF|MTOR|HLA-A|IL6|PTGER4|RORC|SHH|STAT3|STAT6|SYK	-9.47891	-11.4424	51.6845
GO:0010001	GO Biological Processes	19	glial cell differentiation	-10.9412	10.8345	11.6508	30169	184	227	15	6.60793	1.64883	25|207|2064|2247|2475|3065|3553|5594|5595|5604|5781|6469|6774|7099|7124	ABL1|AKT1|ERBB2|FGF2|MTOR|HDAC1|IL1B|MAPK1|MAPK3|MAP2K1|PTPN11|SHH|STAT3|TLR4|TNF	-9.42141	-25.5879	31.4135
GO:0032680	GO Biological Processes	19	regulation of tumor necrosis factor production	-10.9412	10.8345	11.6508	30169	184	227	15	6.60793	1.64883	2950|3066|3569|3717|4282|5295|5781|6774|6850|7099|9971|10392|51738|54106|64127	GSTP1|HDAC2|IL6|JAK2|MIF|PIK3R1|PTPN11|STAT3|SYK|TLR4|NR1H4|NOD1|GHRL|TLR9|NOD2	-9.42141	-25.3768	31.6436
GO:0031663	GO Biological Processes	19	lipopolysaccharide-mediated signaling pathway	-10.9399	30.6699	16.1434	30169	39	227	9	3.96476	1.29512	207|949|1432|3553|5594|5595|7099|7124|10892	AKT1|SCARB1|MAPK14|IL1B|MAPK1|MAPK3|TLR4|TNF|MALT1	-9.42102	-25.5879	31.4135
GO:0034765	GO Biological Processes	19	regulation of ion transmembrane transport	-10.9085	5.87841	9.77058	30169	520	227	23	10.1322	2.00281	25|383|596|623|1080|1131|1394|1612|1909|2147|2149|2185|2539|3688|4318|4842|4988|5170|5243|5319|6548|7124|54106	ABL1|ARG1|BCL2|BDKRB1|CFTR|CHRM3|CRHR1|DAPK1|EDNRA|F2|F2R|PTK2B|G6PD|ITGB1|MMP9|NOS1|OPRM1|PDPK1|ABCB1|PLA2G1B|SLC9A1|TNF|TLR9	-9.39057	-19.6206	16.2077
GO:0001952	GO Biological Processes	19	regulation of cell-matrix adhesion	-10.8933	13.8219	12.5076	30169	125	227	13	5.72687	1.5422	25|596|2185|2932|3791|4323|5054|5295|5747|5879|6548|6714|7422	ABL1|BCL2|PTK2B|GSK3B|KDR|MMP14|SERPINE1|PIK3R1|PTK2|RAC1|SLC9A1|SRC|VEGFA	-9.37635	-10.8933	28.1916
GO:0010564	GO Biological Processes	19	regulation of cell cycle process	-10.8766	4.88215	9.27764	30169	735	227	27	11.8943	2.14861	207|472|595|596|598|891|894|983|1017|1019|1432|1543|1956|2146|2735|3480|3553|4193|5159|5347|5781|6790|7015|7124|11200|23411|23476	AKT1|ATM|CCND1|BCL2|BCL2L1|CCNB1|CCND2|CDK1|CDK2|CDK4|MAPK14|CYP1A1|EGFR|EZH2|GLI1|IGF1R|IL1B|MDM2|PDGFRB|PLK1|PTPN11|AURKA|TERT|TNF|CHEK2|SIRT1|BRD4	-9.36073	-15.1858	23.7327
GO:0002253	GO Biological Processes	19	activation of immune response	-10.8759	7.49305	10.4368	30169	337	227	19	8.37004	1.8381	25|596|673|2033|3105|3123|3265|3320|3551|5290|5594|5747|6714|6850|7099|8517|10892|54106|64127	ABL1|BCL2|BRAF|EP300|HLA-A|HLA-DRB1|HRAS|HSP90AA1|IKBKB|PIK3CA|MAPK1|PTK2|SRC|SYK|TLR4|IKBKG|MALT1|TLR9|NOD2	-9.36073	-18.9163	12.3058
GO:0060249	GO Biological Processes	19	anatomical structure homeostasis	-10.8709	8.08194	10.6612	30169	296	227	18	7.92952	1.79337	134|331|596|2034|2149|2185|2548|3091|3569|3688|3791|5743|5781|6714|7099|7422|54106|64127	ADORA1|XIAP|BCL2|EPAS1|F2R|PTK2B|GAA|HIF1A|IL6|ITGB1|KDR|PTGS2|PTPN11|SRC|TLR4|VEGFA|TLR9|NOD2	-9.35666	-13.9196	15.1889
GO:0032368	GO Biological Processes	19	regulation of lipid transport	-10.8494	12.0041	11.9593	30169	155	227	14	6.1674	1.59667	185|207|1394|3553|3685|4282|4790|5468|5781|6469|6850|8399|23411|51738	AGTR1|AKT1|CRHR1|IL1B|ITGAV|MIF|NFKB1|PPARG|PTPN11|SHH|SYK|PLA2G10|SIRT1|GHRL	-9.33606	-14.3686	30.2052
GO:2000146	GO Biological Processes	19	negative regulation of cell motility	-10.8209	6.94011	10.1867	30169	383	227	20	8.81057	1.88131	134|207|596|673|1545|1803|2247|3065|3066|3486|3488|4282|5054|5467|5468|5734|5879|6469|6774|7124	ADORA1|AKT1|BCL2|BRAF|CYP1B1|DPP4|FGF2|HDAC1|HDAC2|IGFBP3|IGFBP5|MIF|SERPINE1|PPARD|PPARG|PTGER4|RAC1|SHH|STAT3|TNF	-9.30933	-12.8305	12.0821
GO:0010810	GO Biological Processes	19	regulation of cell-substrate adhesion	-10.8208	9.5786	11.1702	30169	222	227	16	7.04846	1.69888	25|596|673|2185|2932|3717|3791|4323|5054|5295|5747|5879|6480|6548|6714|7422	ABL1|BCL2|BRAF|PTK2B|GSK3B|JAK2|KDR|MMP14|SERPINE1|PIK3R1|PTK2|RAC1|ST6GAL1|SLC9A1|SRC|VEGFA	-9.30933	-10.8933	28.1916
GO:0006366	GO Biological Processes	19	transcription by RNA polymerase II	-10.8093	7.42694	10.377	30169	340	227	19	8.37004	1.8381	142|367|1432|2033|2034|2099|2247|3172|3558|3717|4790|5295|5468|6774|6777|7132|7421|7494|9971	PARP1|AR|MAPK14|EP300|EPAS1|ESR1|FGF2|HNF4A|IL2|JAK2|NFKB1|PIK3R1|PPARG|STAT3|STAT5B|TNFRSF1A|VDR|XBP1|NR1H4	-9.29877	-11.3081	7.42694
GO:1903555	GO Biological Processes	19	regulation of tumor necrosis factor superfamily cytokine production	-10.774	10.5479	11.4648	30169	189	227	15	6.60793	1.64883	2950|3066|3569|3717|4282|5295|5781|6774|6850|7099|9971|10392|51738|54106|64127	GSTP1|HDAC2|IL6|JAK2|MIF|PIK3R1|PTPN11|STAT3|SYK|TLR4|NR1H4|NOD1|GHRL|TLR9|NOD2	-9.26433	-25.3768	31.6436
GO:0006970	GO Biological Processes	19	response to osmotic stress	-10.7656	18.7427	13.6614	30169	78	227	11	4.84581	1.42523	624|834|836|2185|2475|3320|4638|5170|5743|7124|114548	BDKRB2|CASP1|CASP3|PTK2B|MTOR|HSP90AA1|MYLK|PDPK1|PTGS2|TNF|NLRP3	-9.2569	-10.7656	28.4792
GO:0009755	GO Biological Processes	19	hormone-mediated signaling pathway	-10.7613	13.498	12.3377	30169	128	227	13	5.72687	1.5422	367|1394|2099|2100|2908|3717|5241|5467|5468|5781|5915|6714|51738	AR|CRHR1|ESR1|ESR2|NR3C1|JAK2|PGR|PPARD|PPARG|PTPN11|RARB|SRC|GHRL	-9.25342	-20.0724	75.9446
GO:0033559	GO Biological Processes	19	unsaturated fatty acid metabolic process	-10.6863	15.4839	12.8207	30169	103	227	12	5.28634	1.48515	240|1543|1544|1545|1557|2950|3248|4282|5742|5743|7132|8399	ALOX5|CYP1A1|CYP1A2|CYP1B1|CYP2C19|GSTP1|HPGD|MIF|PTGS1|PTGS2|TNFRSF1A|PLA2G10	-9.17938	-15.2569	25.3149
GO:0001889	GO Biological Processes	19	liver development	-10.6751	13.2903	12.2275	30169	130	227	13	5.72687	1.5422	383|595|1543|2146|2735|3172|3569|4233|5290|6790|7124|7298|7494	ARG1|CCND1|CYP1A1|EZH2|GLI1|HNF4A|IL6|MET|PIK3CA|AURKA|TNF|TYMS|XBP1	-9.16908	-11.6675	32.0801
GO:0038083	GO Biological Processes	19	peptidyl-tyrosine autophosphorylation	-10.6439	54.7248	19.2924	30169	17	227	7	3.0837	1.14742	25|1956|2185|3480|3791|5595|6714	ABL1|EGFR|PTK2B|IGF1R|KDR|MAPK3|SRC	-9.13881	-10.6439	54.7248
GO:0048015	GO Biological Processes	19	phosphatidylinositol-mediated signaling	-10.642	18.2742	13.4705	30169	80	227	11	4.84581	1.42523	207|2064|2260|3356|3480|5156|5159|5290|5295|5467|6198	AKT1|ERBB2|FGFR1|HTR2A|IGF1R|PDGFRA|PDGFRB|PIK3CA|PIK3R1|PPARD|RPS6KB1	-9.13777	-10.642	39.0891
GO:0002573	GO Biological Processes	19	myeloid leukocyte differentiation	-10.6326	13.1889	12.1733	30169	131	227	13	5.72687	1.5422	142|841|1432|3123|3815|4318|5295|5468|6714|7048|7124|7422|23411	PARP1|CASP8|MAPK14|HLA-DRB1|KIT|MMP9|PIK3R1|PPARG|SRC|TGFBR2|TNF|VEGFA|SIRT1	-9.12926	-16.1654	26.5806
GO:0048708	GO Biological Processes	19	astrocyte differentiation	-10.5871	22.1505	14.2789	30169	60	227	10	4.40529	1.36204	25|3553|5594|5595|5604|5781|6469|6774|7099|7124	ABL1|IL1B|MAPK1|MAPK3|MAP2K1|PTPN11|SHH|STAT3|TLR4|TNF	-9.08545	-25.5879	31.4135
GO:0032760	GO Biological Processes	19	positive regulation of tumor necrosis factor production	-10.5861	15.1889	12.6814	30169	105	227	12	5.28634	1.48515	3066|3569|3717|4282|5295|5781|6774|6850|7099|10392|54106|64127	HDAC2|IL6|JAK2|MIF|PIK3R1|PTPN11|STAT3|SYK|TLR4|NOD1|TLR9|NOD2	-9.08545	-25.3768	31.6436
GO:1901796	GO Biological Processes	19	regulation of signal transduction by p53 class mediator	-10.5861	15.1889	12.6814	30169	105	227	12	5.28634	1.48515	207|472|596|624|2033|2475|4193|4282|6446|6790|11200|23411	AKT1|ATM|BCL2|BDKRB2|EP300|MTOR|MDM2|MIF|SGK1|AURKA|CHEK2|SIRT1	-9.08545	-10.5861	22.9143
GO:0051052	GO Biological Processes	19	regulation of DNA metabolic process	-10.5805	5.66069	9.51555	30169	540	227	23	10.1322	2.00281	142|207|472|890|983|1017|1545|1956|2185|2247|2735|3320|3480|3558|3569|5159|5290|5594|5595|6714|6778|7124|23411	PARP1|AKT1|ATM|CCNA2|CDK1|CDK2|CYP1B1|EGFR|PTK2B|FGF2|GLI1|HSP90AA1|IGF1R|IL2|IL6|PDGFRB|PIK3CA|MAPK1|MAPK3|SRC|STAT6|TNF|SIRT1	-9.08077	-13.7719	17.9599
GO:0031346	GO Biological Processes	19	positive regulation of cell projection organization	-10.5498	7.17375	10.1446	30169	352	227	19	8.37004	1.8381	25|673|2033|2146|2185|2475|2932|3265|3320|3480|3815|5290|5295|5604|5879|5979|6714|7046|7422	ABL1|BRAF|EP300|EZH2|PTK2B|MTOR|GSK3B|HRAS|HSP90AA1|IGF1R|KIT|PIK3CA|PIK3R1|MAP2K1|RAC1|RET|SRC|TGFBR1|VEGFA	-9.05096	-13.9473	22.9143
GO:0061008	GO Biological Processes	19	hepaticobiliary system development	-10.5486	12.9905	12.0667	30169	133	227	13	5.72687	1.5422	383|595|1543|2146|2735|3172|3569|4233|5290|6790|7124|7298|7494	ARG1|CCND1|CYP1A1|EZH2|GLI1|HNF4A|IL6|MET|PIK3CA|AURKA|TNF|TYMS|XBP1	-9.05065	-11.6675	32.0801
GO:0042102	GO Biological Processes	19	positive regulation of T cell proliferation	-10.5368	15.0456	12.6132	30169	106	227	12	5.28634	1.48515	3105|3553|3558|3569|3572|3717|3718|6469|6777|6850|7048|7412	HLA-A|IL1B|IL2|IL6|IL6ST|JAK2|JAK3|SHH|STAT5B|SYK|TGFBR2|VCAM1	-9.03969	-28.2991	25.5583
GO:0006351	GO Biological Processes	19	DNA-templated transcription	-10.5343	5.3608	9.35438	30169	595	227	24	10.5727	2.04087	142|367|890|1017|1432|1786|2033|2034|2099|2247|3172|3558|3717|4790|5295|5468|5595|6774|6777|7132|7421|7494|9971|23476	PARP1|AR|CCNA2|CDK2|MAPK14|DNMT1|EP300|EPAS1|ESR1|FGF2|HNF4A|IL2|JAK2|NFKB1|PIK3R1|PPARG|MAPK3|STAT3|STAT5B|TNFRSF1A|VDR|XBP1|NR1H4|BRD4	-9.03813	-11.3081	7.42694
GO:0030856	GO Biological Processes	19	regulation of epithelial cell differentiation	-10.5172	11.3454	11.5669	30169	164	227	14	6.1674	1.59667	595|2146|2247|3551|3553|4318|5054|6772|6777|7124|7132|7421|7422|7498	CCND1|EZH2|FGF2|IKBKB|IL1B|MMP9|SERPINE1|STAT1|STAT5B|TNF|TNFRSF1A|VDR|VEGFA|XDH	-9.02223	-10.5172	19.4492
GO:0000904	GO Biological Processes	19	cell morphogenesis involved in differentiation	-10.5167	5.61906	9.46608	30169	544	227	23	10.1322	2.00281	25|367|596|673|836|1909|2033|2064|3320|3480|3685|3688|3695|4233|5295|5747|5781|5879|5979|6469|6714|7422|8399	ABL1|AR|BCL2|BRAF|CASP3|EDNRA|EP300|ERBB2|HSP90AA1|IGF1R|ITGAV|ITGB1|ITGB7|MET|PIK3R1|PTK2|PTPN11|RAC1|RET|SHH|SRC|VEGFA|PLA2G10	-9.02223	-12.238	7.3835
GO:0090398	GO Biological Processes	19	cellular senescence	-10.5122	21.7874	14.1504	30169	61	227	10	4.40529	1.36204	25|472|1017|1432|3265|3480|4282|5599|5604|23411	ABL1|ATM|CDK2|MAPK14|HRAS|IGF1R|MIF|MAPK8|MAP2K1|SIRT1	-9.01862	-10.5122	21.7874
GO:0043467	GO Biological Processes	19	regulation of generation of precursor metabolites and energy	-10.5072	12.8936	12.0143	30169	134	227	13	5.72687	1.5422	207|891|983|2033|2475|2645|2932|3091|3356|4843|5290|6774|7124	AKT1|CCNB1|CDK1|EP300|MTOR|GCK|GSK3B|HIF1A|HTR2A|NOS2|PIK3CA|STAT3|TNF	-9.01449	-10.5072	18.9862
GO:0048568	GO Biological Processes	19	embryonic organ development	-10.4978	6.25777	9.74021	30169	446	227	21	9.2511	1.92311	207|841|1909|1956|2034|2735|3091|3576|3791|3815|4323|5156|5594|5595|5604|5915|6469|7046|7048|7124|7422	AKT1|CASP8|EDNRA|EGFR|EPAS1|GLI1|HIF1A|CXCL8|KDR|KIT|MMP14|PDGFRA|MAPK1|MAPK3|MAP2K1|RARB|SHH|TGFBR1|TGFBR2|TNF|VEGFA	-9.00601	-20.3322	15.4197
GO:0010575	GO Biological Processes	19	positive regulation of vascular endothelial growth factor production	-10.4684	36.6629	16.7298	30169	29	227	8	3.52423	1.22385	136|1545|3091|3553|3569|3572|5743|10855	ADORA2B|CYP1B1|HIF1A|IL1B|IL6|IL6ST|PTGS2|HPSE	-8.97746	-10.4684	36.6629
GO:0050804	GO Biological Processes	19	modulation of chemical synaptic transmission	-10.4618	6.22983	9.71048	30169	448	227	21	9.2511	1.92311	25|134|136|673|1269|1636|2185|2932|3265|3356|3553|3688|3717|3815|4311|5594|5743|6714|6869|7124|51738	ABL1|ADORA1|ADORA2B|BRAF|CNR2|ACE|PTK2B|GSK3B|HRAS|HTR2A|IL1B|ITGB1|JAK2|KIT|MME|MAPK1|PTGS2|SRC|TACR1|TNF|GHRL	-8.97173	-13.8324	23.0365
GO:0060397	GO Biological Processes	19	growth hormone receptor signaling pathway via JAK-STAT	-10.4587	79.7419	21.6842	30169	10	227	6	2.64317	1.06471	3716|3717|3718|6774|6777|6778	JAK1|JAK2|JAK3|STAT3|STAT5B|STAT6	-8.96945	-13.5751	79.7419
GO:0007611	GO Biological Processes	19	learning or memory	-10.4567	8.27602	10.5151	30169	273	227	17	7.48899	1.74701	25|673|836|894|1956|2033|3091|3356|3688|3815|4311|5594|5743|6198|6446|6714|6869	ABL1|BRAF|CASP3|CCND2|EGFR|EP300|HIF1A|HTR2A|ITGB1|KIT|MME|MAPK1|PTGS2|RPS6KB1|SGK1|SRC|TACR1	-8.96833	-14.7706	49.8387
GO:0099177	GO Biological Processes	19	regulation of trans-synaptic signaling	-10.4439	6.21596	9.69569	30169	449	227	21	9.2511	1.92311	25|134|136|673|1269|1636|2185|2932|3265|3356|3553|3688|3717|3815|4311|5594|5743|6714|6869|7124|51738	ABL1|ADORA1|ADORA2B|BRAF|CNR2|ACE|PTK2B|GSK3B|HRAS|HTR2A|IL1B|ITGB1|JAK2|KIT|MME|MAPK1|PTGS2|SRC|TACR1|TNF|GHRL	-8.95639	-13.8324	23.0365
GO:0046824	GO Biological Processes	19	positive regulation of nucleocytoplasmic transport	-10.4386	21.436	14.025	30169	62	227	10	4.40529	1.36204	983|1432|2932|3320|3553|3717|5295|5743|6469|8841	CDK1|MAPK14|GSK3B|HSP90AA1|IL1B|JAK2|PIK3R1|PTGS2|SHH|HDAC3	-8.95205	-22.1473	26.5806
GO:0043369	GO Biological Processes	19	CD4-positive or CD8-positive, alpha-beta T cell lineage commitment	-10.4328	51.6845	18.7287	30169	18	227	7	3.0837	1.14742	596|673|2475|3569|6469|6774|6778	BCL2|BRAF|MTOR|IL6|SHH|STAT3|STAT6	-8.94795	-11.4424	51.6845
GO:0051770	GO Biological Processes	19	positive regulation of nitric-oxide synthase biosynthetic process	-10.4328	51.6845	18.7287	30169	18	227	7	3.0837	1.14742	3717|3718|3791|6772|7099|54106|64127	JAK2|JAK3|KDR|STAT1|TLR4|TLR9|NOD2	-8.94795	-11.5766	51.6845
GO:0042692	GO Biological Processes	19	muscle cell differentiation	-10.4317	8.24581	10.4908	30169	274	227	17	7.48899	1.74701	207|596|836|983|1432|1909|1910|2475|3488|3688|4842|5156|5159|5915|6469|6548|7422	AKT1|BCL2|CASP3|CDK1|MAPK14|EDNRA|EDNRB|MTOR|IGFBP5|ITGB1|NOS1|PDGFRA|PDGFRB|RARB|SHH|SLC9A1|VEGFA	-8.94769	-11.1994	132.903
GO:0001959	GO Biological Processes	19	regulation of cytokine-mediated signaling pathway	-10.411	11.1416	11.4429	30169	167	227	14	6.1674	1.59667	331|383|834|841|2950|3091|3551|3569|5468|5781|6850|7132|7852|9971	XIAP|ARG1|CASP1|CASP8|GSTP1|HIF1A|IKBKB|IL6|PPARG|PTPN11|SYK|TNFRSF1A|CXCR4|NR1H4	-8.92872	-11.1136	19.6893
GO:0048469	GO Biological Processes	19	cell maturation	-10.411	11.1416	11.4429	30169	167	227	14	6.1674	1.59667	596|1080|1909|2034|2185|2539|3091|3791|5241|5468|5979|7298|7422|8399	BCL2|CFTR|EDNRA|EPAS1|PTK2B|G6PD|HIF1A|KDR|PGR|PPARG|RET|TYMS|VEGFA|PLA2G10	-8.92872	-10.411	11.1416
GO:0048017	GO Biological Processes	19	inositol lipid-mediated signaling	-10.4048	17.404	13.1087	30169	84	227	11	4.84581	1.42523	207|2064|2260|3356|3480|5156|5159|5290|5295|5467|6198	AKT1|ERBB2|FGFR1|HTR2A|IGF1R|PDGFRA|PDGFRB|PIK3CA|PIK3R1|PPARD|RPS6KB1	-8.92333	-10.642	39.0891
GO:1903557	GO Biological Processes	19	positive regulation of tumor necrosis factor superfamily cytokine production	-10.3919	14.6315	12.4139	30169	109	227	12	5.28634	1.48515	3066|3569|3717|4282|5295|5781|6774|6850|7099|10392|54106|64127	HDAC2|IL6|JAK2|MIF|PIK3R1|PTPN11|STAT3|SYK|TLR4|NOD1|TLR9|NOD2	-8.9113	-25.3768	31.6436
GO:1901987	GO Biological Processes	19	regulation of cell cycle phase transition	-10.3726	6.16107	9.63695	30169	453	227	21	9.2511	1.92311	207|472|595|596|891|894|983|1017|1019|1432|1543|1956|2146|2735|4193|5347|5781|6790|7015|11200|23476	AKT1|ATM|CCND1|BCL2|CCNB1|CCND2|CDK1|CDK2|CDK4|MAPK14|CYP1A1|EGFR|EZH2|GLI1|MDM2|PLK1|PTPN11|AURKA|TERT|CHEK2|BRD4	-8.89282	-15.1858	23.7327
GO:0040007	GO Biological Processes	19	growth	-10.3486	6.53086	9.78149	30169	407	227	20	8.81057	1.88131	25|367|472|596|1909|2033|2099|2146|2246|2475|3320|3688|5159|5781|5915|6469|6714|6790|7048|7298	ABL1|AR|ATM|BCL2|EDNRA|EP300|ESR1|EZH2|FGF1|MTOR|HSP90AA1|ITGB1|PDGFRB|PTPN11|RARB|SHH|SRC|AURKA|TGFBR2|TYMS	-8.87052	-17.1966	14.5514
GO:0048589	GO Biological Processes	19	developmental growth	-10.3486	6.53086	9.78149	30169	407	227	20	8.81057	1.88131	25|367|472|596|1909|2033|2099|2146|2246|2475|3320|3688|5159|5781|5915|6469|6714|6790|7048|7298	ABL1|AR|ATM|BCL2|EDNRA|EP300|ESR1|EZH2|FGF1|MTOR|HSP90AA1|ITGB1|PDGFRB|PTPN11|RARB|SHH|SRC|AURKA|TGFBR2|TYMS	-8.87052	-17.1966	14.5514
GO:0042742	GO Biological Processes	19	defense response to bacterium	-10.3208	6.95636	9.94096	30169	363	227	19	8.37004	1.8381	1991|2147|3105|3553|3569|3960|4353|4843|5054|5319|5320|6850|7099|7124|7132|9971|10392|54106|64127	ELANE|F2|HLA-A|IL1B|IL6|LGALS4|MPO|NOS2|SERPINE1|PLA2G1B|PLA2G2A|SYK|TLR4|TNF|TNFRSF1A|NR1H4|NOD1|TLR9|NOD2	-8.84362	-25.3768	31.6436
GO:0009792	GO Biological Processes	19	embryo development ending in birth or egg hatching	-10.3073	4.99636	9.07362	30169	665	227	25	11.0132	2.07782	25|207|367|472|598|836|841|891|1636|1909|1956|2033|2034|2247|2260|3091|3688|4323|5156|5594|5604|6469|7046|7048|7422	ABL1|AKT1|AR|ATM|BCL2L1|CASP3|CASP8|CCNB1|ACE|EDNRA|EGFR|EP300|EPAS1|FGF2|FGFR1|HIF1A|ITGB1|MMP14|PDGFRA|MAPK1|MAP2K1|SHH|TGFBR1|TGFBR2|VEGFA	-8.83098	-20.3322	15.4197
GO:0097529	GO Biological Processes	19	myeloid leukocyte migration	-10.305	12.4298	11.7602	30169	139	227	13	5.72687	1.5422	1910|2321|3553|3569|3576|3577|3579|3815|4313|5295|5319|6777|6850	EDNRB|FLT1|IL1B|IL6|CXCL8|CXCR1|CXCR2|KIT|MMP2|PIK3R1|PLA2G1B|STAT5B|SYK	-8.82949	-29.6709	15.1889
GO:0050864	GO Biological Processes	19	regulation of B cell activation	-10.3009	9.77229	10.9463	30169	204	227	15	6.60793	1.64883	196|472|596|836|3558|3569|4282|4323|6777|6778|6850|7099|7494|54106|64127	AHR|ATM|BCL2|CASP3|IL2|IL6|MIF|MMP14|STAT5B|STAT6|SYK|TLR4|XBP1|TLR9|NOD2	-8.82621	-10.3009	44.301
GO:2001239	GO Biological Processes	19	regulation of extrinsic apoptotic signaling pathway in absence of ligand	-10.2438	26.0028	14.7762	30169	46	227	9	3.96476	1.29512	207|596|598|2260|3553|4170|5979|7015|7124	AKT1|BCL2|BCL2L1|FGFR1|IL1B|MCL1|RET|TERT|TNF	-8.76994	-12.9737	27.3624
GO:0046328	GO Biological Processes	19	regulation of JNK cascade	-10.2264	12.2535	11.6622	30169	141	227	13	5.72687	1.5422	331|1956|2185|2950|3265|3480|3553|7099|7124|8841|10392|54106|64127	XIAP|EGFR|PTK2B|GSTP1|HRAS|IGF1R|IL1B|TLR4|TNF|HDAC3|NOD1|TLR9|NOD2	-8.75362	-25.3768	31.6436
GO:1905953	GO Biological Processes	19	negative regulation of lipid localization	-10.2258	20.4466	13.6658	30169	65	227	10	4.40529	1.36204	207|3569|3685|4790|5467|5468|5781|6469|7124|8399	AKT1|IL6|ITGAV|NFKB1|PPARD|PPARG|PTPN11|SHH|TNF|PLA2G10	-8.75362	-14.3686	30.2052
GO:0051146	GO Biological Processes	19	striated muscle cell differentiation	-10.211	9.63066	10.849	30169	207	227	15	6.60793	1.64883	207|596|836|983|1432|2475|3488|3688|4842|5156|5159|5915|6469|6548|7422	AKT1|BCL2|CASP3|CDK1|MAPK14|MTOR|IGFBP5|ITGB1|NOS1|PDGFRA|PDGFRB|RARB|SHH|SLC9A1|VEGFA	-8.73968	-11.1994	132.903
GO:0009266	GO Biological Processes	19	response to temperature stimulus	-10.1714	10.6934	11.1653	30169	174	227	14	6.1674	1.59667	134|207|841|2246|2475|3066|3320|3356|4842|5743|6198|6548|6869|7852	ADORA1|AKT1|CASP8|FGF1|MTOR|HDAC2|HSP90AA1|HTR2A|NOS1|PTGS2|RPS6KB1|SLC9A1|TACR1|CXCR4	-8.70092	-10.1714	44.301
GO:0001818	GO Biological Processes	19	negative regulation of cytokine production	-10.1593	6.80636	9.79812	30169	371	227	19	8.37004	1.8381	383|1991|2146|2147|2950|3123|3569|3718|4790|5734|5879|7099|7124|8399|9971|51738|54106|64127|114548	ARG1|ELANE|EZH2|F2|GSTP1|HLA-DRB1|IL6|JAK3|NFKB1|PTGER4|RAC1|TLR4|TNF|PLA2G10|NR1H4|GHRL|TLR9|NOD2|NLRP3	-8.68967	-20.526	14.446
GO:0008584	GO Biological Processes	19	male gonad development	-10.1491	12.0821	11.5661	30169	143	227	13	5.72687	1.5422	367|595|596|598|1545|1636|2099|3815|4323|5156|5159|7046|54106	AR|CCND1|BCL2|BCL2L1|CYP1B1|ACE|ESR1|KIT|MMP14|PDGFRA|PDGFRB|TGFBR1|TLR9	-8.68105	-20.0267	24.6117
GO:0010212	GO Biological Processes	19	response to ionizing radiation	-10.1491	12.0821	11.5661	30169	143	227	13	5.72687	1.5422	142|472|595|596|598|836|894|1432|3265|4193|7412|11200|23411	PARP1|ATM|CCND1|BCL2|BCL2L1|CASP3|CCND2|MAPK14|HRAS|MDM2|VCAM1|CHEK2|SIRT1	-8.68105	-10.5861	22.9143
GO:0005975	GO Biological Processes	19	carbohydrate metabolic process	-10.1459	5.98919	9.45081	30169	466	227	21	9.2511	1.92311	207|217|276|673|1432|2539|2548|2645|2932|3356|3417|3572|4351|5290|5315|5467|6524|7124|8972|10327|51738	AKT1|ALDH2|AMY1A|BRAF|MAPK14|G6PD|GAA|GCK|GSK3B|HTR2A|IDH1|IL6ST|MPI|PIK3CA|PKM|PPARD|SLC5A2|TNF|MGAM|AKR1A1|GHRL	-8.67876	-10.1459	11.7613
GO:0010469	GO Biological Processes	19	regulation of signaling receptor activity	-10.1381	10.6322	11.1269	30169	175	227	14	6.1674	1.59667	134|1612|2100|2185|3065|3066|3091|3688|3717|4988|5054|5468|6714|7124	ADORA1|DAPK1|ESR2|PTK2B|HDAC1|HDAC2|HIF1A|ITGB1|JAK2|OPRM1|SERPINE1|PPARG|SRC|TNF	-8.67172	-10.1381	17.3352
GO:0045619	GO Biological Processes	19	regulation of lymphocyte differentiation	-10.1226	9.49308	10.7537	30169	210	227	15	6.60793	1.64883	25|673|2064|3123|3558|3718|4323|6469|6777|6850|7048|7494|10892|54106|114548	ABL1|BRAF|ERBB2|HLA-DRB1|IL2|JAK3|MMP14|SHH|STAT5B|SYK|TGFBR2|XBP1|MALT1|TLR9|NLRP3	-8.65706	-28.2991	25.5583
GO:0060020	GO Biological Processes	19	Bergmann glial cell differentiation	-10.119	72.4926	20.6491	30169	11	227	6	2.64317	1.06471	25|5594|5595|5604|5781|6469	ABL1|MAPK1|MAPK3|MAP2K1|PTPN11|SHH	-8.65425	-10.119	99.6773
GO:0046546	GO Biological Processes	19	development of primary male sexual characteristics	-10.1108	11.9982	11.5188	30169	144	227	13	5.72687	1.5422	367|595|596|598|1545|1636|2099|3815|4323|5156|5159|7046|54106	AR|CCND1|BCL2|BCL2L1|CYP1B1|ACE|ESR1|KIT|MMP14|PDGFRA|PDGFRB|TGFBR1|TLR9	-8.64694	-20.0267	24.6117
GO:0019058	GO Biological Processes	19	viral life cycle	-10.072	10.5121	11.0511	30169	177	227	14	6.1674	1.59667	185|290|949|983|1234|1508|1803|1956|3356|3383|3685|3688|3695|7852	AGTR1|ANPEP|SCARB1|CDK1|CCR5|CTSB|DPP4|EGFR|HTR2A|ICAM1|ITGAV|ITGB1|ITGB7|CXCR4	-8.60897	-15.007	30.6699
GO:1901216	GO Biological Processes	19	positive regulation of neuron death	-10.0186	16.0652	12.5319	30169	91	227	11	4.84581	1.42523	25|134|142|472|836|841|2908|2932|4170|7099|7124	ABL1|ADORA1|PARP1|ATM|CASP3|CASP8|NR3C1|GSK3B|MCL1|TLR4|TNF	-8.55633	-10.0186	56.9585
GO:0002706	GO Biological Processes	19	regulation of lymphocyte mediated immunity	-10.0068	10.3947	10.9765	30169	179	227	14	6.1674	1.59667	196|383|3105|3123|3553|3558|3569|6777|6778|7124|10892|11035|64127|114548	AHR|ARG1|HLA-A|HLA-DRB1|IL1B|IL2|IL6|STAT5B|STAT6|TNF|MALT1|RIPK3|NOD2|NLRP3	-8.5454	-28.2991	25.5583
GO:0002768	GO Biological Processes	19	immune response-regulating cell surface receptor signaling pathway	-9.99985	7.73751	10.0732	30169	292	227	17	7.48899	1.74701	25|596|673|2033|3105|3123|3265|3551|3815|5290|5594|5599|5747|6714|6850|8517|10892	ABL1|BCL2|BRAF|EP300|HLA-A|HLA-DRB1|HRAS|IKBKB|KIT|PIK3CA|MAPK1|MAPK8|PTK2|SRC|SYK|IKBKG|MALT1	-8.53922	-18.9163	12.3058
GO:0035051	GO Biological Processes	19	cardiocyte differentiation	-9.98269	13.5156	11.8606	30169	118	227	12	5.28634	1.48515	983|1909|2475|3688|5156|5159|5594|5595|5915|6548|7412|7422	CDK1|EDNRA|MTOR|ITGB1|PDGFRA|PDGFRB|MAPK1|MAPK3|RARB|SLC9A1|VCAM1|VEGFA	-8.52287	-11.1994	132.903
GO:0035924	GO Biological Processes	19	cellular response to vascular endothelial growth factor stimulus	-9.98165	24.4108	14.2801	30169	49	227	9	3.96476	1.29512	207|1432|2321|3791|5156|5159|5290|7412|7422	AKT1|MAPK14|FLT1|KDR|PDGFRA|PDGFRB|PIK3CA|VCAM1|VEGFA	-8.52264	-11.1994	132.903
GO:0071695	GO Biological Processes	19	anatomical structure maturation	-9.97839	9.27231	10.599	30169	215	227	15	6.60793	1.64883	596|1080|1909|2034|2185|2539|3091|3791|4313|5241|5468|5979|7298|7422|8399	BCL2|CFTR|EDNRA|EPAS1|PTK2B|G6PD|HIF1A|KDR|MMP2|PGR|PPARG|RET|TYMS|VEGFA|PLA2G10	-8.52019	-10.411	11.1416
GO:0043534	GO Biological Processes	19	blood vessel endothelial cell migration	-9.96979	32.2189	15.6235	30169	33	227	8	3.52423	1.22385	207|949|1545|2185|2247|3688|3791|7422	AKT1|SCARB1|CYP1B1|PTK2B|FGF2|ITGB1|KDR|VEGFA	-8.5124	-18.7692	49.8387
GO:0032386	GO Biological Processes	19	regulation of intracellular transport	-9.96711	7.11981	9.82211	30169	336	227	18	7.92952	1.79337	983|1432|2064|2932|3265|3320|3553|3717|5295|5594|5595|5599|5604|5743|5781|6469|6714|8841	CDK1|MAPK14|ERBB2|GSK3B|HRAS|HSP90AA1|IL1B|JAK2|PIK3R1|MAPK1|MAPK3|MAPK8|MAP2K1|PTGS2|PTPN11|SHH|SRC|HDAC3	-8.51053	-22.1473	26.5806
GO:0018107	GO Biological Processes	19	peptidyl-threonine phosphorylation	-9.95853	19.2613	13.2227	30169	69	227	10	4.40529	1.36204	207|596|983|2475|2932|5170|5594|5599|7046|7048	AKT1|BCL2|CDK1|MTOR|GSK3B|PDPK1|MAPK1|MAPK8|TGFBR1|TGFBR2	-8.50276	-19.3713	19.2613
GO:0048598	GO Biological Processes	19	embryonic morphogenesis	-9.93713	5.25218	9.01922	30169	582	227	23	10.1322	2.00281	25|836|1909|2247|2321|2735|3065|3066|3091|3685|3688|4313|4318|4323|5156|5594|5595|5604|5915|5979|6469|7046|7048	ABL1|CASP3|EDNRA|FGF2|FLT1|GLI1|HDAC1|HDAC2|HIF1A|ITGAV|ITGB1|MMP2|MMP9|MMP14|PDGFRA|MAPK1|MAPK3|MAP2K1|RARB|RET|SHH|TGFBR1|TGFBR2	-8.48215	-20.3322	15.4197
GO:1904705	GO Biological Processes	19	regulation of vascular associated smooth muscle cell proliferation	-9.91433	15.7197	12.3787	30169	93	227	11	4.84581	1.42523	1786|2247|3248|3488|3717|4313|4318|5468|6714|7015|7124	DNMT1|FGF2|HPGD|IGFBP5|JAK2|MMP2|MMP9|PPARG|SRC|TERT|TNF	-8.46096	-25.7384	29.8354
GO:2000106	GO Biological Processes	19	regulation of leukocyte apoptotic process	-9.91433	15.7197	12.3787	30169	93	227	11	4.84581	1.42523	596|598|3091|3558|3579|3718|4282|6480|11035|23411|64127	BCL2|BCL2L1|HIF1A|IL2|CXCR2|JAK3|MIF|ST6GAL1|RIPK3|SIRT1|NOD2	-8.46096	-9.91433	44.301
GO:0032722	GO Biological Processes	19	positive regulation of chemokine production	-9.89443	18.9862	13.1177	30169	70	227	10	4.40529	1.36204	136|3091|3553|3569|4282|6850|7099|7124|54106|64127	ADORA2B|HIF1A|IL1B|IL6|MIF|SYK|TLR4|TNF|TLR9|NOD2	-8.44186	-25.3768	31.6436
GO:0034405	GO Biological Processes	19	response to fluid shear stress	-9.85609	31.2713	15.3773	30169	34	227	8	3.52423	1.22385	207|1636|2185|4313|5159|5743|6714|8841	AKT1|ACE|PTK2B|MMP2|PDGFRB|PTGS2|SRC|HDAC3	-8.40432	-9.85609	49.8387
GO:0007292	GO Biological Processes	19	female gamete generation	-9.85137	11.442	11.2002	30169	151	227	13	5.72687	1.5422	472|596|1909|2185|3248|4313|5241|5347|5743|6714|6790|7153|23411	ATM|BCL2|EDNRA|PTK2B|HPGD|MMP2|PGR|PLK1|PTGS2|SRC|AURKA|TOP2A|SIRT1	-8.40119	-9.85137	11.442
GO:0009749	GO Biological Processes	19	response to glucose	-9.85137	11.442	11.2002	30169	151	227	13	5.72687	1.5422	836|1636|2185|2645|3091|3172|3383|3480|5290|5467|6198|7048|7494	CASP3|ACE|PTK2B|GCK|HIF1A|HNF4A|ICAM1|IGF1R|PIK3CA|PPARD|RPS6KB1|TGFBR2|XBP1	-8.40119	-13.44	12.7791
GO:0061448	GO Biological Processes	19	connective tissue development	-9.83794	9.06157	10.4493	30169	220	227	15	6.60793	1.64883	1019|1432|2247|3091|3265|5159|5290|5467|5595|5915|6097|7048|7298|7494|51738	CDK4|MAPK14|FGF2|HIF1A|HRAS|PDGFRB|PIK3CA|PPARD|MAPK3|RARB|RORC|TGFBR2|TYMS|XBP1|GHRL	-8.38856	-11.0611	9.06157
GO:0055082	GO Biological Processes	19	cellular chemical homeostasis	-9.81809	5.44482	9.04912	30169	537	227	22	9.69163	1.96358	134|479|596|1080|1636|1909|1991|2147|2645|3091|3356|3383|3480|5290|5295|5594|5595|6548|7421|7494|9971|23411	ADORA1|ATP12A|BCL2|CFTR|ACE|EDNRA|ELANE|F2|GCK|HIF1A|HTR2A|ICAM1|IGF1R|PIK3CA|PIK3R1|MAPK1|MAPK3|SLC9A1|VDR|XBP1|NR1H4|SIRT1	-8.36949	-13.0748	10.7396
GO:0060324	GO Biological Processes	19	face development	-9.8168	23.4535	13.9734	30169	51	227	9	3.96476	1.29512	673|1909|2033|4313|5156|5594|5595|5604|5781	BRAF|EDNRA|EP300|MMP2|PDGFRA|MAPK1|MAPK3|MAP2K1|PTPN11	-8.36899	-9.8168	30.6699
GO:1900407	GO Biological Processes	19	regulation of cellular response to oxidative stress	-9.81255	15.3888	12.2303	30169	95	227	11	4.84581	1.42523	25|142|207|240|3091|4170|4233|4314|7099|7124|23411	ABL1|PARP1|AKT1|ALOX5|HIF1A|MCL1|MET|MMP3|TLR4|TNF|SIRT1	-8.36554	-10.0186	56.9585
GO:0043524	GO Biological Processes	19	negative regulation of neuron apoptotic process	-9.74428	11.2191	11.07	30169	154	227	13	5.72687	1.5422	595|596|598|673|2149|2185|3091|3265|3572|3717|3791|5290|7015	CCND1|BCL2|BCL2L1|BRAF|F2R|PTK2B|HIF1A|HRAS|IL6ST|JAK2|KDR|PIK3CA|TERT	-8.29805	-20.7071	12.8026
GO:1904062	GO Biological Processes	19	regulation of cation transmembrane transport	-9.71692	6.40903	9.40996	30169	394	227	19	8.37004	1.8381	25|383|596|623|1394|1612|1909|2147|2149|2185|2539|3688|4318|4842|4988|5170|5319|6548|54106	ABL1|ARG1|BCL2|BDKRB1|CRHR1|DAPK1|EDNRA|F2|F2R|PTK2B|G6PD|ITGB1|MMP9|NOS1|OPRM1|PDPK1|PLA2G1B|SLC9A1|TLR9	-8.27148	-19.6206	16.2077
GO:0051000	GO Biological Processes	19	positive regulation of nitric-oxide synthase activity	-9.71486	42.2873	16.8676	30169	22	227	7	3.0837	1.14742	207|949|2185|3091|7015|7124|10392	AKT1|SCARB1|PTK2B|HIF1A|TERT|TNF|NOD1	-8.2702	-15.7672	42.2873
GO:0002690	GO Biological Processes	19	positive regulation of leukocyte chemotaxis	-9.71314	15.0715	12.0862	30169	97	227	11	4.84581	1.42523	2185|3569|3576|3579|5054|5594|5595|5747|5879|7422|7941	PTK2B|IL6|CXCL8|CXCR2|SERPINE1|MAPK1|MAPK3|PTK2|RAC1|VEGFA|PLA2G7	-8.26926	-23.5059	20.0608
GO:0010675	GO Biological Processes	19	regulation of cellular carbohydrate metabolic process	-9.70911	11.1467	11.0274	30169	155	227	13	5.72687	1.5422	207|2033|2185|2475|2645|2908|2932|3486|3487|6097|6714|6774|23411	AKT1|EP300|PTK2B|MTOR|GCK|NR3C1|GSK3B|IGFBP3|IGFBP4|RORC|SRC|STAT3|SIRT1	-8.26601	-11.9947	30.2052
GO:0033555	GO Biological Processes	19	multicellular organismal response to stress	-9.70812	18.2059	12.8153	30169	73	227	10	4.40529	1.36204	207|596|1394|1803|1910|2475|4842|5979|6198|6869	AKT1|BCL2|CRHR1|DPP4|EDNRB|MTOR|NOS1|RET|RPS6KB1|TACR1	-8.2658	-10.1714	44.301
GO:0002366	GO Biological Processes	19	leukocyte activation involved in immune response	-9.66239	9.79286	10.5863	30169	190	227	14	6.1674	1.59667	25|136|2185|2475|3383|3558|3569|3815|5734|6097|6774|6778|6850|7099	ABL1|ADORA2B|PTK2B|MTOR|ICAM1|IL2|IL6|KIT|PTGER4|RORC|STAT3|STAT6|SYK|TLR4	-8.22085	-11.4424	51.6845
GO:0015908	GO Biological Processes	19	fatty acid transport	-9.64791	17.9599	12.7185	30169	74	227	10	4.40529	1.36204	624|1636|2168|2169|5319|5320|5467|5468|6198|8399	BDKRB2|ACE|FABP1|FABP2|PLA2G1B|PLA2G2A|PPARD|PPARG|RPS6KB1|PLA2G10	-8.20881	-15.1054	31.0107
GO:2000573	GO Biological Processes	19	positive regulation of DNA biosynthetic process	-9.64791	17.9599	12.7185	30169	74	227	10	4.40529	1.36204	472|1545|2185|2247|3320|5159|5594|5595|6714|7124	ATM|CYP1B1|PTK2B|FGF2|HSP90AA1|PDGFRB|MAPK1|MAPK3|SRC|TNF	-8.20881	-13.7719	17.9599
GO:2000628	GO Biological Processes	19	regulation of miRNA metabolic process	-9.64791	17.9599	12.7185	30169	74	227	10	4.40529	1.36204	2247|2908|3091|3265|4790|5467|5468|6774|7015|7124	FGF2|NR3C1|HIF1A|HRAS|NFKB1|PPARD|PPARG|STAT3|TERT|TNF	-8.20881	-9.64791	41.5322
GO:0044283	GO Biological Processes	19	small molecule biosynthetic process	-9.64725	5.95978	9.18818	30169	446	227	20	8.81057	1.88131	240|834|1080|1543|1544|1576|1806|2247|2539|2950|4282|4353|5319|5742|5743|6850|7494|8399|10327|29881	ALOX5|CASP1|CFTR|CYP1A1|CYP1A2|CYP3A4|DPYD|FGF2|G6PD|GSTP1|MIF|MPO|PLA2G1B|PTGS1|PTGS2|SYK|XBP1|PLA2G10|AKR1A1|NPC1L1	-8.20881	-15.2569	25.3149
GO:0090316	GO Biological Processes	19	positive regulation of intracellular protein transport	-9.63952	11.0047	10.9434	30169	157	227	13	5.72687	1.5422	983|1432|2064|2932|3265|3320|3553|3717|5295|5599|5743|6469|8841	CDK1|MAPK14|ERBB2|GSK3B|HRAS|HSP90AA1|IL1B|JAK2|PIK3R1|MAPK8|PTGS2|SHH|HDAC3	-8.20186	-22.1473	26.5806
GO:0031334	GO Biological Processes	19	positive regulation of protein-containing complex assembly	-9.60219	9.69085	10.5188	30169	192	227	14	6.1674	1.59667	472|2099|2185|2475|2932|3320|4233|4314|5879|6714|6850|7099|7124|7422	ATM|ESR1|PTK2B|MTOR|GSK3B|HSP90AA1|MET|MMP3|RAC1|SRC|SYK|TLR4|TNF|VEGFA	-8.1653	-13.9473	22.9143
GO:1901990	GO Biological Processes	19	regulation of mitotic cell cycle phase transition	-9.60044	6.75778	9.48823	30169	354	227	18	7.92952	1.79337	207|472|595|596|891|894|983|1017|1019|1543|1956|2146|4193|5347|6790|7015|11200|23476	AKT1|ATM|CCND1|BCL2|CCNB1|CCND2|CDK1|CDK2|CDK4|CYP1A1|EGFR|EZH2|MDM2|PLK1|AURKA|TERT|CHEK2|BRD4	-8.16432	-15.1858	23.7327
GO:0043536	GO Biological Processes	19	positive regulation of blood vessel endothelial cell migration	-9.58861	17.7204	12.6236	30169	75	227	10	4.40529	1.36204	25|207|2247|2260|3091|3791|5170|5743|7422|23411	ABL1|AKT1|FGF2|FGFR1|HIF1A|KDR|PDPK1|PTGS2|VEGFA|SIRT1	-8.15326	-27.9533	17.7204
GO:0010883	GO Biological Processes	19	regulation of lipid storage	-9.58275	22.1505	13.5448	30169	54	227	9	3.96476	1.29512	949|3569|3685|4790|5467|5468|7124|8399|23411	SCARB1|IL6|ITGAV|NFKB1|PPARD|PPARG|TNF|PLA2G10|SIRT1	-8.14893	-14.3686	30.2052
GO:0015909	GO Biological Processes	19	long-chain fatty acid transport	-9.58275	22.1505	13.5448	30169	54	227	9	3.96476	1.29512	624|1636|2168|2169|5319|5320|5468|6198|8399	BDKRB2|ACE|FABP1|FABP2|PLA2G1B|PLA2G2A|PPARG|RPS6KB1|PLA2G10	-8.14893	-15.1054	31.0107
GO:1901992	GO Biological Processes	19	positive regulation of mitotic cell cycle phase transition	-9.56824	14.6193	11.878	30169	100	227	11	4.84581	1.42523	207|595|891|894|983|1019|1543|1956|4193|7015|23476	AKT1|CCND1|CCNB1|CCND2|CDK1|CDK4|CYP1A1|EGFR|MDM2|TERT|BRD4	-8.13518	-15.1858	23.7327
GO:0002263	GO Biological Processes	19	cell activation involved in immune response	-9.5427	9.59094	10.4522	30169	194	227	14	6.1674	1.59667	25|136|2185|2475|3383|3558|3569|3815|5734|6097|6774|6778|6850|7099	ABL1|ADORA2B|PTK2B|MTOR|ICAM1|IL2|IL6|KIT|PTGER4|RORC|STAT3|STAT6|SYK|TLR4	-8.11041	-11.4424	51.6845
GO:0071276	GO Biological Processes	19	cellular response to cadmium ion	-9.53686	28.7358	14.6985	30169	37	227	8	3.52423	1.22385	207|1147|1544|1956|4318|5594|5595|5599	AKT1|CHUK|CYP1A2|EGFR|MMP9|MAPK1|MAPK3|MAPK8	-8.10533	-17.3351	28.7358
GO:0002526	GO Biological Processes	19	acute inflammatory response	-9.53018	17.4872	12.5305	30169	76	227	10	4.40529	1.36204	1991|2147|2152|3553|3569|3579|4988|6869|7124|7412	ELANE|F2|F3|IL1B|IL6|CXCR2|OPRM1|TACR1|TNF|VCAM1	-8.09941	-9.53018	33.2258
GO:2000107	GO Biological Processes	19	negative regulation of leukocyte apoptotic process	-9.50798	21.7478	13.4096	30169	55	227	9	3.96476	1.29512	596|598|3091|3558|3579|3718|4282|6480|64127	BCL2|BCL2L1|HIF1A|IL2|CXCR2|JAK3|MIF|ST6GAL1|NOD2	-8.07796	-9.91433	44.301
GO:0071560	GO Biological Processes	19	cellular response to transforming growth factor beta stimulus	-9.5033	10.7313	10.7798	30169	161	227	13	5.72687	1.5422	25|142|383|2908|3066|3248|3480|5747|6714|6774|7046|7048|23411	ABL1|PARP1|ARG1|NR3C1|HDAC2|HPGD|IGF1R|PTK2|SRC|STAT3|TGFBR1|TGFBR2|SIRT1	-8.07404	-9.5033	10.7313
GO:0031341	GO Biological Processes	19	regulation of cell killing	-9.47431	14.3327	11.7441	30169	102	227	11	4.84581	1.42523	383|598|3105|3123|3383|4843|5551|5599|6777|6850|11035	ARG1|BCL2L1|HLA-A|HLA-DRB1|ICAM1|NOS2|PRF1|MAPK8|STAT5B|SYK|RIPK3	-8.04581	-9.47431	66.4515
GO:0071248	GO Biological Processes	19	cellular response to metal ion	-9.45476	9.44489	10.3542	30169	197	227	14	6.1674	1.59667	142|207|673|1147|1543|1544|1956|4318|5594|5595|5599|5743|6469|54106	PARP1|AKT1|BRAF|CHUK|CYP1A1|CYP1A2|EGFR|MMP9|MAPK1|MAPK3|MAPK8|PTGS2|SHH|TLR9	-8.02701	-17.3351	28.7358
GO:0046427	GO Biological Processes	19	positive regulation of receptor signaling pathway via JAK-STAT	-9.43701	27.9796	14.4899	30169	38	227	8	3.52423	1.22385	1545|2147|2149|2185|3569|3717|3815|7124	CYP1B1|F2|F2R|PTK2B|IL6|JAK2|KIT|TNF	-8.01077	-18.9652	56.9585
GO:0071715	GO Biological Processes	19	icosanoid transport	-9.43701	27.9796	14.4899	30169	38	227	8	3.52423	1.22385	624|1636|4363|4843|5319|5320|5743|8399	BDKRB2|ACE|ABCC1|NOS2|PLA2G1B|PLA2G2A|PTGS2|PLA2G10	-8.01077	-15.1054	31.0107
GO:2000630	GO Biological Processes	19	positive regulation of miRNA metabolic process	-9.43471	21.3594	13.2779	30169	56	227	9	3.96476	1.29512	2247|2908|3091|3265|4790|5468|6774|7015|7124	FGF2|NR3C1|HIF1A|HRAS|NFKB1|PPARG|STAT3|TERT|TNF	-8.00922	-9.64791	41.5322
GO:0043254	GO Biological Processes	19	regulation of protein-containing complex assembly	-9.42678	6.15892	9.15773	30169	410	227	19	8.37004	1.8381	25|142|472|2033|2099|2185|2475|2932|3320|4233|4314|5734|5781|5879|6714|6850|7099|7124|7422	ABL1|PARP1|ATM|EP300|ESR1|PTK2B|MTOR|GSK3B|HSP90AA1|MET|MMP3|PTGER4|PTPN11|RAC1|SRC|SYK|TLR4|TNF|VEGFA	-8.00204	-13.9473	22.9143
GO:0018210	GO Biological Processes	19	peptidyl-threonine modification	-9.41587	17.0389	12.3495	30169	78	227	10	4.40529	1.36204	207|596|983|2475|2932|5170|5594|5599|7046|7048	AKT1|BCL2|CDK1|MTOR|GSK3B|PDPK1|MAPK1|MAPK8|TGFBR1|TGFBR2	-7.99188	-19.3713	19.2613
GO:0002360	GO Biological Processes	19	T cell lineage commitment	-9.41305	38.7634	16.1144	30169	24	227	7	3.0837	1.14742	596|673|2475|3569|6469|6774|6778	BCL2|BRAF|MTOR|IL6|SHH|STAT3|STAT6	-7.9898	-11.4424	51.6845
GO:0043086	GO Biological Processes	19	negative regulation of catalytic activity	-9.38736	4.34106	8.31786	30169	796	227	26	11.4537	2.11371	25|207|330|331|836|1269|1508|1910|2168|2932|2950|3265|3551|3553|4318|4790|4842|5054|5170|5347|5468|5743|6714|7124|7422|23411	ABL1|AKT1|BIRC3|XIAP|CASP3|CNR2|CTSB|EDNRB|FABP1|GSK3B|GSTP1|HRAS|IKBKB|IL1B|MMP9|NFKB1|NOS1|SERPINE1|PDPK1|PLK1|PPARG|PTGS2|SRC|TNF|VEGFA|SIRT1	-7.96486	-9.38736	15.335
GO:1902882	GO Biological Processes	19	regulation of response to oxidative stress	-9.38243	14.0571	11.6139	30169	104	227	11	4.84581	1.42523	25|142|207|240|3091|4170|4233|4314|7099|7124|23411	ABL1|PARP1|AKT1|ALOX5|HIF1A|MCL1|MET|MMP3|TLR4|TNF|SIRT1	-7.96067	-10.0186	56.9585
GO:0001894	GO Biological Processes	19	tissue homeostasis	-9.36098	8.37624	9.94739	30169	238	227	15	6.60793	1.64883	331|596|2034|2149|2185|3569|3688|3791|5743|5781|6714|7099|7422|54106|64127	XIAP|BCL2|EPAS1|F2R|PTK2B|IL6|ITGB1|KDR|PTGS2|PTPN11|SRC|TLR4|VEGFA|TLR9|NOD2	-7.94071	-13.9196	15.1889
GO:0060485	GO Biological Processes	19	mesenchyme development	-9.36098	8.37624	9.94739	30169	238	227	15	6.60793	1.64883	596|1909|1910|2260|2932|3091|4193|5159|5594|5595|5979|6469|6772|7046|7048	BCL2|EDNRA|EDNRB|FGFR1|GSK3B|HIF1A|MDM2|PDGFRB|MAPK1|MAPK3|RET|SHH|STAT1|TGFBR1|TGFBR2	-7.94071	-12.0673	33.2258
GO:0070102	GO Biological Processes	19	interleukin-6-mediated signaling pathway	-9.31425	56.9585	18.2346	30169	14	227	6	2.64317	1.06471	3569|3572|3716|3717|6714|6774	IL6|IL6ST|JAK1|JAK2|SRC|STAT3	-7.89472	-18.9652	56.9585
GO:0030307	GO Biological Processes	19	positive regulation of cell growth	-9.30597	10.3457	10.5449	30169	167	227	13	5.72687	1.5422	207|596|1956|2064|2147|2185|2475|3558|4323|6548|7046|7422|7852	AKT1|BCL2|EGFR|ERBB2|F2|PTK2B|MTOR|IL2|MMP14|SLC9A1|TGFBR1|VEGFA|CXCR4	-7.88717	-25.7734	11.2026
GO:1903201	GO Biological Processes	19	regulation of oxidative stress-induced cell death	-9.30479	16.6129	12.175	30169	80	227	10	4.40529	1.36204	25|142|207|3091|4170|4233|4314|7099|7124|23411	ABL1|PARP1|AKT1|HIF1A|MCL1|MET|MMP3|TLR4|TNF|SIRT1	-7.88674	-10.0186	56.9585
GO:0048639	GO Biological Processes	19	positive regulation of developmental growth	-9.27386	10.2842	10.5069	30169	168	227	13	5.72687	1.5422	207|596|983|1432|2247|2735|5467|6198|6777|7048|7422|7852|51738	AKT1|BCL2|CDK1|MAPK14|FGF2|GLI1|PPARD|RPS6KB1|STAT5B|TGFBR2|VEGFA|CXCR4|GHRL	-7.85731	-12.9368	17.7204
GO:0071559	GO Biological Processes	19	response to transforming growth factor beta	-9.27386	10.2842	10.5069	30169	168	227	13	5.72687	1.5422	25|142|383|2908|3066|3248|3480|5747|6714|6774|7046|7048|23411	ABL1|PARP1|ARG1|NR3C1|HDAC2|HPGD|IGF1R|PTK2|SRC|STAT3|TGFBR1|TGFBR2|SIRT1	-7.85731	-9.5033	10.7313
GO:2000209	GO Biological Processes	19	regulation of anoikis	-9.27316	37.2129	15.7717	30169	25	227	7	3.0837	1.14742	596|3688|4170|5290|5747|6714|11200	BCL2|ITGB1|MCL1|PIK3CA|PTK2|SRC|CHEK2	-7.85731	-9.27316	44.301
GO:1901888	GO Biological Processes	19	regulation of cell junction assembly	-9.25536	9.1208	10.1333	30169	204	227	14	6.1674	1.59667	25|1636|3551|3553|3791|4323|5747|5879|6548|6714|7124|7422|51738|151306	ABL1|ACE|IKBKB|IL1B|KDR|MMP14|PTK2|RAC1|SLC9A1|SRC|TNF|VEGFA|GHRL|GPBAR1	-7.84065	-10.8933	28.1916
GO:0051098	GO Biological Processes	19	regulation of binding	-9.25504	6.43079	9.17687	30169	372	227	18	7.92952	1.79337	25|142|207|1636|2033|2932|3066|3717|4233|4318|5347|5468|5595|5599|6714|6790|7015|7046	ABL1|PARP1|AKT1|ACE|EP300|GSK3B|HDAC2|JAK2|MET|MMP9|PLK1|PPARG|MAPK3|MAPK8|SRC|AURKA|TERT|TGFBR1	-7.84065	-9.25504	10.4923
GO:0014013	GO Biological Processes	19	regulation of gliogenesis	-9.24824	13.6629	11.4252	30169	107	227	11	4.84581	1.42523	2146|2147|2475|3065|3066|3553|3569|3572|6469|7124|7852	EZH2|F2|MTOR|HDAC1|HDAC2|IL1B|IL6|IL6ST|SHH|TNF|CXCR4	-7.83459	-18.317	26.5806
GO:0042307	GO Biological Processes	19	positive regulation of protein import into nucleus	-9.24601	26.5806	14.096	30169	40	227	8	3.52423	1.22385	983|1432|3320|3717|5295|5743|6469|8841	CDK1|MAPK14|HSP90AA1|JAK2|PIK3R1|PTGS2|SHH|HDAC3	-7.83309	-22.1473	26.5806
GO:0046324	GO Biological Processes	19	regulation of glucose import	-9.22346	20.2734	12.9025	30169	59	227	9	3.96476	1.29512	207|1432|1636|5295|5319|5781|6198|7015|7124	AKT1|MAPK14|ACE|PIK3R1|PLA2G1B|PTPN11|RPS6KB1|TERT|TNF	-7.81126	-12.231	20.7122
GO:0007276	GO Biological Processes	19	gamete generation	-9.18511	4.41245	8.25692	30169	753	227	25	11.0132	2.07782	207|330|367|472|596|598|1080|1636|1909|2185|2475|2735|3248|3688|3815|4313|5241|5347|5743|6198|6714|6790|7046|7153|23411	AKT1|BIRC3|AR|ATM|BCL2|BCL2L1|CFTR|ACE|EDNRA|PTK2B|MTOR|GLI1|HPGD|ITGB1|KIT|MMP2|PGR|PLK1|PTGS2|RPS6KB1|SRC|AURKA|TGFBR1|TOP2A|SIRT1	-7.77364	-9.85137	11.442
GO:0001654	GO Biological Processes	19	eye development	-9.16258	6.34551	9.09401	30169	377	227	18	7.92952	1.79337	596|1543|1545|1956|2321|3065|3066|3091|3791|5156|5159|5915|5979|6469|6774|7046|7048|7422	BCL2|CYP1A1|CYP1B1|EGFR|FLT1|HDAC1|HDAC2|HIF1A|KDR|PDGFRA|PDGFRB|RARB|RET|SHH|STAT3|TGFBR1|TGFBR2|VEGFA	-7.75184	-17.1338	20.1368
GO:0046822	GO Biological Processes	19	regulation of nucleocytoplasmic transport	-9.1611	13.4122	11.3035	30169	109	227	11	4.84581	1.42523	983|1432|2932|3320|3553|3717|5295|5743|5781|6469|8841	CDK1|MAPK14|GSK3B|HSP90AA1|IL1B|JAK2|PIK3R1|PTGS2|PTPN11|SHH|HDAC3	-7.75108	-22.1473	26.5806
GO:1903798	GO Biological Processes	19	regulation of miRNA maturation	-9.13971	35.7816	15.4486	30169	26	227	7	3.0837	1.14742	1956|2099|3569|5604|6774|7015|7124	EGFR|ESR1|IL6|MAP2K1|STAT3|TERT|TNF	-7.73042	-9.64791	41.5322
GO:0043009	GO Biological Processes	19	chordate embryonic development	-9.09738	4.75392	8.37788	30169	643	227	23	10.1322	2.00281	25|207|367|472|598|836|841|891|1909|1956|2033|2034|2260|3091|3688|4323|5156|5594|5604|6469|7046|7048|7422	ABL1|AKT1|AR|ATM|BCL2L1|CASP3|CASP8|CCNB1|EDNRA|EGFR|EP300|EPAS1|FGFR1|HIF1A|ITGB1|MMP14|PDGFRA|MAPK1|MAP2K1|SHH|TGFBR1|TGFBR2|VEGFA	-7.68881	-20.3322	15.4197
GO:0150063	GO Biological Processes	19	visual system development	-9.08966	6.27889	9.0288	30169	381	227	18	7.92952	1.79337	596|1543|1545|1956|2321|3065|3066|3091|3791|5156|5159|5915|5979|6469|6774|7046|7048|7422	BCL2|CYP1A1|CYP1B1|EGFR|FLT1|HDAC1|HDAC2|HIF1A|KDR|PDGFRA|PDGFRB|RARB|RET|SHH|STAT3|TGFBR1|TGFBR2|VEGFA	-7.6818	-17.1338	20.1368
GO:0002066	GO Biological Processes	19	columnar/cuboidal epithelial cell development	-9.06558	25.3149	13.7298	30169	42	227	8	3.52423	1.22385	3091|3172|3572|5170|5241|5915|6714|7298	HIF1A|HNF4A|IL6ST|PDPK1|PGR|RARB|SRC|TYMS	-7.66046	-17.2451	37.9723
GO:0045429	GO Biological Processes	19	positive regulation of nitric oxide biosynthetic process	-9.06558	25.3149	13.7298	30169	42	227	8	3.52423	1.22385	207|2185|3320|3553|3717|5743|7099|7124	AKT1|PTK2B|HSP90AA1|IL1B|JAK2|PTGS2|TLR4|TNF	-7.66046	-15.7672	42.2873
GO:1904894	GO Biological Processes	19	positive regulation of receptor signaling pathway via STAT	-9.06558	25.3149	13.7298	30169	42	227	8	3.52423	1.22385	1545|2147|2149|2185|3569|3717|3815|7124	CYP1B1|F2|F2R|PTK2B|IL6|JAK2|KIT|TNF	-7.66046	-18.9652	56.9585
GO:0045165	GO Biological Processes	19	cell fate commitment	-9.06545	7.97419	9.6413	30169	250	227	15	6.60793	1.64883	596|673|836|1909|2034|2475|3569|3688|3791|4170|5468|6469|6774|6778|7046	BCL2|BRAF|CASP3|EDNRA|EPAS1|MTOR|IL6|ITGB1|KDR|MCL1|PPARG|SHH|STAT3|STAT6|TGFBR1	-7.66046	-11.4424	51.6845
GO:0045428	GO Biological Processes	19	regulation of nitric oxide biosynthetic process	-9.02392	19.2924	12.5539	30169	62	227	9	3.96476	1.29512	207|2185|3320|3553|3717|5743|5879|7099|7124	AKT1|PTK2B|HSP90AA1|IL1B|JAK2|PTGS2|RAC1|TLR4|TNF	-7.62037	-15.7672	42.2873
GO:1904036	GO Biological Processes	19	negative regulation of epithelial cell apoptotic process	-9.02392	19.2924	12.5539	30169	62	227	9	3.96476	1.29512	25|596|673|3383|3480|3791|5054|5170|7015	ABL1|BCL2|BRAF|ICAM1|IGF1R|KDR|SERPINE1|PDPK1|TERT	-7.62037	-12.9175	26.5806
GO:0048880	GO Biological Processes	19	sensory system development	-8.98195	6.18154	8.93271	30169	387	227	18	7.92952	1.79337	596|1543|1545|1956|2321|3065|3066|3091|3791|5156|5159|5915|5979|6469|6774|7046|7048|7422	BCL2|CYP1A1|CYP1B1|EGFR|FLT1|HDAC1|HDAC2|HIF1A|KDR|PDGFRA|PDGFRB|RARB|RET|SHH|STAT3|TGFBR1|TGFBR2|VEGFA	-7.57912	-17.1338	20.1368
GO:0045058	GO Biological Processes	19	T cell selection	-8.97899	24.7262	13.5562	30169	43	227	8	3.52423	1.22385	596|673|2475|3569|6469|6774|6778|6850	BCL2|BRAF|MTOR|IL6|SHH|STAT3|STAT6|SYK	-7.57757	-11.4424	51.6845
GO:0071548	GO Biological Processes	19	response to dexamethasone	-8.97899	24.7262	13.5562	30169	43	227	8	3.52423	1.22385	383|1545|1636|2908|3480|3717|5290|6198	ARG1|CYP1B1|ACE|NR3C1|IGF1R|JAK2|PIK3CA|RPS6KB1	-7.57757	-21.1405	24.7262
GO:0050994	GO Biological Processes	19	regulation of lipid catabolic process	-8.9598	18.9862	12.4431	30169	63	227	9	3.96476	1.29512	134|207|949|1019|2168|3248|3417|3553|7124	ADORA1|AKT1|SCARB1|CDK4|FABP1|HPGD|IDH1|IL1B|TNF	-7.55909	-15.7672	42.2873
GO:0002824	GO Biological Processes	19	positive regulation of adaptive immune response based on somatic recombination of immune receptors built from immunoglobulin superfamily domains	-8.95085	12.824	11.0129	30169	114	227	11	4.84581	1.42523	3105|3123|3553|3558|3569|3717|6778|7124|10892|64127|114548	HLA-A|HLA-DRB1|IL1B|IL2|IL6|JAK2|STAT6|TNF|MALT1|NOD2|NLRP3	-7.55085	-28.2991	25.5583
GO:0001776	GO Biological Processes	19	leukocyte homeostasis	-8.93912	15.2762	11.6109	30169	87	227	10	4.40529	1.36204	25|207|596|836|2149|3091|3569|3718|6777|11035	ABL1|AKT1|BCL2|CASP3|F2R|HIF1A|IL6|JAK3|STAT5B|RIPK3	-7.54124	-8.93912	20.9847
GO:0044843	GO Biological Processes	19	cell cycle G1/S phase transition	-8.93912	15.2762	11.6109	30169	87	227	10	4.40529	1.36204	595|596|890|894|1017|1019|2146|3688|6198|23476	CCND1|BCL2|CCNA2|CCND2|CDK2|CDK4|EZH2|ITGB1|RPS6KB1|BRD4	-7.54124	-15.1858	23.7327
GO:1904892	GO Biological Processes	19	regulation of receptor signaling pathway via STAT	-8.93912	15.2762	11.6109	30169	87	227	10	4.40529	1.36204	1545|2147|2149|2185|3569|3717|3718|3815|5468|7124	CYP1B1|F2|F2R|PTK2B|IL6|JAK2|JAK3|KIT|PPARG|TNF	-7.54124	-18.9652	56.9585
GO:0045580	GO Biological Processes	19	regulation of T cell differentiation	-8.93432	9.65218	10.109	30169	179	227	13	5.72687	1.5422	25|673|2064|3123|3558|3718|6469|6777|6850|7048|7494|10892|114548	ABL1|BRAF|ERBB2|HLA-DRB1|IL2|JAK3|SHH|STAT5B|SYK|TGFBR2|XBP1|MALT1|NLRP3	-7.53714	-28.2991	25.5583
GO:0021700	GO Biological Processes	19	developmental maturation	-8.92374	7.78729	9.49581	30169	256	227	15	6.60793	1.64883	596|1080|1909|2034|2185|2539|3091|3791|4313|5241|5468|5979|7298|7422|8399	BCL2|CFTR|EDNRA|EPAS1|PTK2B|G6PD|HIF1A|KDR|MMP2|PGR|PPARG|RET|TYMS|VEGFA|PLA2G10	-7.52726	-10.411	11.1416
GO:0045936	GO Biological Processes	19	negative regulation of phosphate metabolic process	-8.91747	5.739	8.71903	30169	440	227	19	8.37004	1.8381	25|142|207|623|624|836|2932|2950|3486|3551|3553|3558|5170|5347|5468|6774|7124|7498|23411	ABL1|PARP1|AKT1|BDKRB1|BDKRB2|CASP3|GSK3B|GSTP1|IGFBP3|IKBKB|IL1B|IL2|PDPK1|PLK1|PPARG|STAT3|TNF|XDH|SIRT1	-7.52169	-8.91747	8.71496
GO:0010563	GO Biological Processes	19	negative regulation of phosphorus metabolic process	-8.90121	5.72598	8.70511	30169	441	227	19	8.37004	1.8381	25|142|207|623|624|836|2932|2950|3486|3551|3553|3558|5170|5347|5468|6774|7124|7498|23411	ABL1|PARP1|AKT1|BDKRB1|BDKRB2|CASP3|GSK3B|GSTP1|IGFBP3|IKBKB|IL1B|IL2|PDPK1|PLK1|PPARG|STAT3|TNF|XDH|SIRT1	-7.50613	-8.91747	8.71496
GO:0014911	GO Biological Processes	19	positive regulation of smooth muscle cell migration	-8.89465	24.1642	13.3883	30169	44	227	8	3.52423	1.22385	596|1545|3488|5159|6198|6714|7015|7099	BCL2|CYP1B1|IGFBP5|PDGFRB|RPS6KB1|SRC|TERT|TLR4	-7.50097	-12.9593	27.6881
GO:1904407	GO Biological Processes	19	positive regulation of nitric oxide metabolic process	-8.89465	24.1642	13.3883	30169	44	227	8	3.52423	1.22385	207|2185|3320|3553|3717|5743|7099|7124	AKT1|PTK2B|HSP90AA1|IL1B|JAK2|PTGS2|TLR4|TNF	-7.50097	-15.7672	42.2873
GO:0070920	GO Biological Processes	19	regulation of production of small RNA involved in gene silencing by RNA	-8.88999	33.2258	14.8542	30169	28	227	7	3.0837	1.14742	1956|2099|3569|5604|6774|7015|7124	EGFR|ESR1|IL6|MAP2K1|STAT3|TERT|TNF	-7.49798	-9.64791	41.5322
GO:1903672	GO Biological Processes	19	positive regulation of sprouting angiogenesis	-8.88999	33.2258	14.8542	30169	28	227	7	3.0837	1.14742	2246|2247|3716|5170|5315|7422|51738	FGF1|FGF2|JAK1|PDPK1|PKM|VEGFA|GHRL	-7.49798	-8.88999	39.8709
GO:0046889	GO Biological Processes	19	positive regulation of lipid biosynthetic process	-8.88958	15.1026	11.5356	30169	88	227	10	4.40529	1.36204	207|949|2246|2475|3356|3480|3553|5743|7124|9971	AKT1|SCARB1|FGF1|MTOR|HTR2A|IGF1R|IL1B|PTGS2|TNF|NR1H4	-7.49798	-25.7798	20.7122
GO:0003014	GO Biological Processes	19	renal system process	-8.86963	12.6029	10.9018	30169	116	227	11	4.84581	1.42523	134|185|596|1909|1910|2149|6446|6523|6524|6869|9429	ADORA1|AGTR1|BCL2|EDNRA|EDNRB|F2R|SGK1|SLC5A1|SLC5A2|TACR1|ABCG2	-7.47938	-8.86963	39.8709
GO:0045598	GO Biological Processes	19	regulation of fat cell differentiation	-8.86959	10.8492	10.4229	30169	147	227	12	5.28634	1.48515	207|240|1432|3356|3569|5467|5468|5743|6097|7124|7494|23411	AKT1|ALOX5|MAPK14|HTR2A|IL6|PPARD|PPARG|PTGS2|RORC|TNF|XBP1|SIRT1	-7.47938	-8.86959	30.6699
GO:0031175	GO Biological Processes	19	neuron projection development	-8.86829	4.62446	8.2039	30169	661	227	23	10.1322	2.00281	596|836|1909|2064|2185|2932|3066|3320|3480|3569|3688|3717|4313|5747|5781|5879|5979|6446|6469|6790|7422|8399|51738	BCL2|CASP3|EDNRA|ERBB2|PTK2B|GSK3B|HDAC2|HSP90AA1|IGF1R|IL6|ITGB1|JAK2|MMP2|PTK2|PTPN11|RAC1|RET|SGK1|SHH|AURKA|VEGFA|PLA2G10|GHRL	-7.47877	-12.238	7.3835
GO:0002709	GO Biological Processes	19	regulation of T cell mediated immunity	-8.84066	14.9329	11.4616	30169	89	227	10	4.40529	1.36204	196|383|3105|3123|3553|3569|10892|11035|64127|114548	AHR|ARG1|HLA-A|HLA-DRB1|IL1B|IL6|MALT1|RIPK3|NOD2|NLRP3	-7.45252	-28.2991	25.5583
GO:0071229	GO Biological Processes	19	cellular response to acid chemical	-8.84066	14.9329	11.4616	30169	89	227	10	4.40529	1.36204	598|1786|1956|2475|4313|5156|5290|7124|7422|7494	BCL2L1|DNMT1|EGFR|MTOR|MMP2|PDGFRA|PIK3CA|TNF|VEGFA|XBP1	-7.45252	-11.7619	14.9329
GO:0080164	GO Biological Processes	19	regulation of nitric oxide metabolic process	-8.83492	18.402	12.2289	30169	65	227	9	3.96476	1.29512	207|2185|3320|3553|3717|5743|5879|7099|7124	AKT1|PTK2B|HSP90AA1|IL1B|JAK2|PTGS2|RAC1|TLR4|TNF	-7.44746	-15.7672	42.2873
GO:0060964	GO Biological Processes	19	regulation of miRNA-mediated gene silencing	-8.81244	23.6272	13.2259	30169	45	227	8	3.52423	1.22385	1956|2099|3569|5468|5604|6774|7015|7124	EGFR|ESR1|IL6|PPARG|MAP2K1|STAT3|TERT|TNF	-7.42636	-9.64791	41.5322
GO:1904646	GO Biological Processes	19	cellular response to amyloid-beta	-8.81244	23.6272	13.2259	30169	45	227	8	3.52423	1.22385	142|2932|3383|3480|4363|7099|7124|7412	PARP1|GSK3B|ICAM1|IGF1R|ABCC1|TLR4|TNF|VCAM1	-7.42636	-12.5129	27.1231
GO:0002429	GO Biological Processes	19	immune response-activating cell surface receptor signaling pathway	-8.78583	7.60896	9.35498	30169	262	227	15	6.60793	1.64883	25|596|673|2033|3105|3123|3265|3551|5290|5594|5747|6714|6850|8517|10892	ABL1|BCL2|BRAF|EP300|HLA-A|HLA-DRB1|HRAS|IKBKB|PIK3CA|MAPK1|PTK2|SRC|SYK|IKBKG|MALT1	-7.40111	-18.9163	12.3058
GO:0002757	GO Biological Processes	19	immune response-activating signal transduction	-8.78583	7.60896	9.35498	30169	262	227	15	6.60793	1.64883	25|596|673|2033|3105|3123|3265|3551|5290|5594|5747|6714|6850|8517|10892	ABL1|BCL2|BRAF|EP300|HLA-A|HLA-DRB1|HRAS|IKBKB|PIK3CA|MAPK1|PTK2|SRC|SYK|IKBKG|MALT1	-7.40111	-18.9163	12.3058
GO:0097421	GO Biological Processes	19	liver regeneration	-8.77279	32.0801	14.5799	30169	29	227	7	3.0837	1.14742	595|2146|2735|3569|6790|7124|7298	CCND1|EZH2|GLI1|IL6|AURKA|TNF|TYMS	-7.38876	-11.6675	32.0801
GO:0043535	GO Biological Processes	19	regulation of blood vessel endothelial cell migration	-8.76877	10.6322	10.2972	30169	150	227	12	5.28634	1.48515	25|207|2247|2260|3091|3791|5170|5468|5743|7124|7422|23411	ABL1|AKT1|FGF2|FGFR1|HIF1A|KDR|PDPK1|PPARG|PTGS2|TNF|VEGFA|SIRT1	-7.38543	-27.9533	17.7204
GO:0002708	GO Biological Processes	19	positive regulation of lymphocyte mediated immunity	-8.75069	12.2852	10.74	30169	119	227	11	4.84581	1.42523	3105|3123|3553|3558|3569|6777|6778|7124|10892|64127|114548	HLA-A|HLA-DRB1|IL1B|IL2|IL6|STAT5B|STAT6|TNF|MALT1|NOD2|NLRP3	-7.3687	-28.2991	25.5583
GO:0006633	GO Biological Processes	19	fatty acid biosynthetic process	-8.75069	12.2852	10.74	30169	119	227	11	4.84581	1.42523	240|1543|1544|1576|2950|4282|5319|5742|5743|7494|8399	ALOX5|CYP1A1|CYP1A2|CYP3A4|GSTP1|MIF|PLA2G1B|PTGS1|PTGS2|XBP1|PLA2G10	-7.3687	-15.2569	25.3149
GO:0034767	GO Biological Processes	19	positive regulation of ion transmembrane transport	-8.73036	9.28893	9.87331	30169	186	227	13	5.72687	1.5422	25|623|1080|1909|2147|2149|2539|3688|4842|5170|5243|5319|6548	ABL1|BDKRB1|CFTR|EDNRA|F2|F2R|G6PD|ITGB1|NOS1|PDPK1|ABCB1|PLA2G1B|SLC9A1	-7.34905	-19.6206	16.2077
GO:0033157	GO Biological Processes	19	regulation of intracellular protein transport	-8.70106	8.26953	9.5299	30169	225	227	14	6.1674	1.59667	983|1432|2064|2932|3265|3320|3553|3717|5295|5599|5743|5781|6469|8841	CDK1|MAPK14|ERBB2|GSK3B|HRAS|HSP90AA1|IL1B|JAK2|PIK3R1|MAPK8|PTGS2|PTPN11|SHH|HDAC3	-7.32042	-22.1473	26.5806
GO:1903169	GO Biological Processes	19	regulation of calcium ion transmembrane transport	-8.67368	9.19011	9.80824	30169	188	227	13	5.72687	1.5422	25|596|623|1394|2147|2149|2185|2539|4842|5170|5319|6548|54106	ABL1|BCL2|BDKRB1|CRHR1|F2|F2R|PTK2B|G6PD|NOS1|PDPK1|PLA2G1B|SLC9A1|TLR9	-7.29372	-19.6206	16.2077
GO:0032309	GO Biological Processes	19	icosanoid secretion	-8.66018	31.0107	14.3192	30169	30	227	7	3.0837	1.14742	624|1636|4843|5319|5320|5743|8399	BDKRB2|ACE|NOS2|PLA2G1B|PLA2G2A|PTGS2|PLA2G10	-7.28157	-15.1054	31.0107
GO:0043368	GO Biological Processes	19	positive T cell selection	-8.66018	31.0107	14.3192	30169	30	227	7	3.0837	1.14742	596|673|2475|3569|6469|6774|6778	BCL2|BRAF|MTOR|IL6|SHH|STAT3|STAT6	-7.28157	-11.4424	51.6845
GO:1902808	GO Biological Processes	19	positive regulation of cell cycle G1/S phase transition	-8.65543	17.5901	11.925	30169	68	227	9	3.96476	1.29512	207|595|894|1543|1956|2146|2735|4193|7015	AKT1|CCND1|CCND2|CYP1A1|EGFR|EZH2|GLI1|MDM2|TERT	-7.27749	-15.1858	23.7327
GO:0070849	GO Biological Processes	19	response to epidermal growth factor	-8.65405	22.6218	12.9165	30169	47	227	8	3.52423	1.22385	207|1956|2064|5170|5594|5595|5781|6777	AKT1|EGFR|ERBB2|PDPK1|MAPK1|MAPK3|PTPN11|STAT5B	-7.27745	-13.5093	29.8354
GO:1900368	GO Biological Processes	19	regulation of post-transcriptional gene silencing by RNA	-8.65405	22.6218	12.9165	30169	47	227	8	3.52423	1.22385	1956|2099|3569|5468|5604|6774|7015|7124	EGFR|ESR1|IL6|PPARG|MAP2K1|STAT3|TERT|TNF	-7.27745	-9.64791	41.5322
GO:0044070	GO Biological Processes	19	regulation of anion transport	-8.65095	14.2907	11.177	30169	93	227	10	4.40529	1.36204	134|383|1080|3553|3688|4282|5243|6850|7124|8399	ADORA1|ARG1|CFTR|IL1B|ITGB1|MIF|ABCB1|SYK|TNF|PLA2G10	-7.27502	-8.65095	49.8387
GO:0030278	GO Biological Processes	19	regulation of ossification	-8.63507	11.9831	10.584	30169	122	227	11	4.84581	1.42523	240|596|1432|2185|3091|5594|5595|5734|5781|6869|7421	ALOX5|BCL2|MAPK14|PTK2B|HIF1A|MAPK1|MAPK3|PTGER4|PTPN11|TACR1|VDR	-7.25982	-8.63507	11.9831
GO:0000278	GO Biological Processes	19	mitotic cell cycle	-8.63116	4.70075	8.12034	30169	622	227	22	9.69163	1.96358	25|472|595|596|890|891|894|983|1017|1019|1909|2146|3688|4193|5243|5347|5781|6198|6777|6790|11200|23476	ABL1|ATM|CCND1|BCL2|CCNA2|CCNB1|CCND2|CDK1|CDK2|CDK4|EDNRA|EZH2|ITGB1|MDM2|ABCB1|PLK1|PTPN11|RPS6KB1|STAT5B|AURKA|CHEK2|BRD4	-7.25657	-15.1858	23.7327
GO:0050777	GO Biological Processes	19	negative regulation of immune response	-8.61769	9.09337	9.74414	30169	190	227	13	5.72687	1.5422	142|196|383|1432|3105|3123|3558|3718|5468|6714|6778|6850|64127	PARP1|AHR|ARG1|MAPK14|HLA-A|HLA-DRB1|IL2|JAK3|PPARG|SRC|STAT6|SYK|NOD2	-7.24377	-20.526	14.446
GO:0046394	GO Biological Processes	19	carboxylic acid biosynthetic process	-8.60753	7.3835	9.174	30169	270	227	15	6.60793	1.64883	240|834|1543|1544|1576|1806|2950|4282|5319|5742|5743|6850|7494|8399|10327	ALOX5|CASP1|CYP1A1|CYP1A2|CYP3A4|DPYD|GSTP1|MIF|PLA2G1B|PTGS1|PTGS2|SYK|XBP1|PLA2G10|AKR1A1	-7.23434	-15.2569	25.3149
GO:0050871	GO Biological Processes	19	positive regulation of B cell activation	-8.60571	10.2893	10.0956	30169	155	227	12	5.28634	1.48515	596|3558|3569|4282|4323|6777|6778|6850|7099|7494|54106|64127	BCL2|IL2|IL6|MIF|MMP14|STAT5B|STAT6|SYK|TLR4|XBP1|TLR9|NOD2	-7.23434	-10.3009	44.301
GO:0051492	GO Biological Processes	19	regulation of stress fiber assembly	-8.60494	14.1386	11.1085	30169	94	227	10	4.40529	1.36204	25|673|2475|4233|5295|5734|5879|6548|6869|7046	ABL1|BRAF|MTOR|MET|PIK3R1|PTGER4|RAC1|SLC9A1|TACR1|TGFBR1	-7.23434	-13.9473	22.9143
GO:0098586	GO Biological Processes	19	cellular response to virus	-8.60494	14.1386	11.1085	30169	94	227	10	4.40529	1.36204	1147|1432|3091|3320|3569|3716|3717|3964|4790|114548	CHUK|MAPK14|HIF1A|HSP90AA1|IL6|JAK1|JAK2|LGALS8|NFKB1|NLRP3	-7.23434	-16.2207	14.1386
GO:1900542	GO Biological Processes	19	regulation of purine nucleotide metabolic process	-8.60494	14.1386	11.1085	30169	94	227	10	4.40529	1.36204	136|142|2033|2475|2645|3091|3356|4842|4843|6774	ADORA2B|PARP1|EP300|MTOR|GCK|HIF1A|HTR2A|NOS1|NOS2|STAT3	-7.23434	-10.5072	18.9862
GO:0014015	GO Biological Processes	19	positive regulation of gliogenesis	-8.59756	17.3352	11.828	30169	69	227	9	3.96476	1.29512	2475|3065|3066|3553|3569|3572|6469|7124|7852	MTOR|HDAC1|HDAC2|IL1B|IL6|IL6ST|SHH|TNF|CXCR4	-7.22862	-18.317	26.5806
GO:0150116	GO Biological Processes	19	regulation of cell-substrate junction organization	-8.59756	17.3352	11.828	30169	69	227	9	3.96476	1.29512	25|3791|4323|5295|5747|5879|6548|6714|7422	ABL1|KDR|MMP14|PIK3R1|PTK2|RAC1|SLC9A1|SRC|VEGFA	-7.22862	-10.8933	28.1916
GO:0046887	GO Biological Processes	19	positive regulation of hormone secretion	-8.59724	11.8856	10.5332	30169	123	227	11	4.84581	1.42523	1080|2645|3091|3123|3717|5467|5468|5781|6869|9971|51738	CFTR|GCK|HIF1A|HLA-DRB1|JAK2|PPARD|PPARG|PTPN11|TACR1|NR1H4|GHRL	-7.22862	-26.71	29.534
GO:0022602	GO Biological Processes	19	ovulation cycle process	-8.57767	22.1505	12.7689	30169	48	227	8	3.52423	1.22385	836|2099|4313|5156|5241|6714|6777|23411	CASP3|ESR1|MMP2|PDGFRA|PGR|SRC|STAT5B|SIRT1	-7.21036	-11.3698	39.8709
GO:0060147	GO Biological Processes	19	regulation of post-transcriptional gene silencing	-8.57767	22.1505	12.7689	30169	48	227	8	3.52423	1.22385	1956|2099|3569|5468|5604|6774|7015|7124	EGFR|ESR1|IL6|PPARG|MAP2K1|STAT3|TERT|TNF	-7.21036	-9.64791	41.5322
GO:0016053	GO Biological Processes	19	organic acid biosynthetic process	-8.56391	7.32921	9.1299	30169	272	227	15	6.60793	1.64883	240|834|1543|1544|1576|1806|2950|4282|5319|5742|5743|6850|7494|8399|10327	ALOX5|CASP1|CYP1A1|CYP1A2|CYP3A4|DPYD|GSTP1|MIF|PLA2G1B|PTGS1|PTGS2|SYK|XBP1|PLA2G10|AKR1A1	-7.19725	-15.2569	25.3149
GO:0071354	GO Biological Processes	19	cellular response to interleukin-6	-8.5518	30.0104	14.0709	30169	31	227	7	3.0837	1.14742	3569|3572|3716|3717|4790|6714|6774	IL6|IL6ST|JAK1|JAK2|NFKB1|SRC|STAT3	-7.1858	-18.9652	56.9585
GO:0031620	GO Biological Processes	19	regulation of fever generation	-8.54711	73.835	19.0279	30169	9	227	5	2.20264	0.974143	1910|3553|5733|5743|7124	EDNRB|IL1B|PTGER3|PTGS2|TNF	-7.18176	-11.6147	75.9446
GO:0033033	GO Biological Processes	19	negative regulation of myeloid cell apoptotic process	-8.53407	44.301	16.0003	30169	18	227	6	2.64317	1.06471	596|3579|4282|6480|6777|64127	BCL2|CXCR2|MIF|ST6GAL1|STAT5B|NOD2	-7.17003	-9.91433	44.301
GO:2000811	GO Biological Processes	19	negative regulation of anoikis	-8.53407	44.301	16.0003	30169	18	227	6	2.64317	1.06471	596|3688|4170|5290|5747|6714	BCL2|ITGB1|MCL1|PIK3CA|PTK2|SRC	-7.17003	-9.27316	44.301
GO:1904375	GO Biological Processes	19	regulation of protein localization to cell periphery	-8.5226	11.6955	10.4333	30169	125	227	11	4.84581	1.42523	207|367|598|1956|3265|3688|4323|5170|5295|5347|7124	AKT1|AR|BCL2L1|EGFR|HRAS|ITGB1|MMP14|PDPK1|PIK3R1|PLK1|TNF	-7.15921	-8.5226	13.5156
GO:0031400	GO Biological Processes	19	negative regulation of protein modification process	-8.51321	5.12151	8.24656	30169	519	227	20	8.81057	1.88131	25|207|623|624|836|1786|2539|2932|2950|3066|3486|3551|3553|3558|5170|5347|5468|7124|7498|23411	ABL1|AKT1|BDKRB1|BDKRB2|CASP3|DNMT1|G6PD|GSK3B|GSTP1|HDAC2|IGFBP3|IKBKB|IL1B|IL2|PDPK1|PLK1|PPARG|TNF|XDH|SIRT1	-7.15047	-8.91747	8.71496
GO:0031589	GO Biological Processes	19	cell-substrate adhesion	-8.50769	8.90588	9.61872	30169	194	227	13	5.72687	1.5422	25|596|673|2185|3685|3688|3695|5295|5467|5879|6714|7412|10855	ABL1|BCL2|BRAF|PTK2B|ITGAV|ITGB1|ITGB7|PIK3R1|PPARD|RAC1|SRC|VCAM1|HPSE	-7.1456	-8.50769	16.04
GO:0031281	GO Biological Processes	19	positive regulation of cyclase activity	-8.50307	21.6985	12.6257	30169	49	227	8	3.52423	1.22385	136|1394|1432|1909|4842|4843|5595|5599	ADORA2B|CRHR1|MAPK14|EDNRA|NOS1|NOS2|MAPK3|MAPK8	-7.14162	-8.50307	44.301
GO:0006066	GO Biological Processes	19	alcohol metabolic process	-8.46752	6.62445	8.82106	30169	321	227	16	7.04846	1.69888	217|949|1080|1543|1544|1545|1576|1910|2247|2539|3417|5467|8694|10327|29881|57016	ALDH2|SCARB1|CFTR|CYP1A1|CYP1A2|CYP1B1|CYP3A4|EDNRB|FGF2|G6PD|IDH1|PPARD|DGAT1|AKR1A1|NPC1L1|AKR1B10	-7.10672	-12.4171	66.4515
GO:0016241	GO Biological Processes	19	regulation of macroautophagy	-8.44849	9.96773	9.9029	30169	160	227	12	5.28634	1.48515	207|836|2475|3091|3791|5290|5595|5599|8517|10392|23411|64127	AKT1|CASP3|MTOR|HIF1A|KDR|PIK3CA|MAPK3|MAPK8|IKBKG|NOD1|SIRT1|NOD2	-7.08898	-18.0996	12.4043
GO:0051147	GO Biological Processes	19	regulation of muscle cell differentiation	-8.44849	9.96773	9.9029	30169	160	227	12	5.28634	1.48515	596|1432|1786|2146|2475|2539|3815|4193|4323|6469|7494|23411	BCL2|MAPK14|DNMT1|EZH2|MTOR|G6PD|KIT|MDM2|MMP14|SHH|XBP1|SIRT1	-7.08898	-8.44849	23.4535
GO:0006909	GO Biological Processes	19	phagocytosis	-8.43391	7.88408	9.24427	30169	236	227	14	6.1674	1.59667	25|134|949|1991|3685|3688|4233|5290|5747|5879|6714|6850|7099|64127	ABL1|ADORA1|SCARB1|ELANE|ITGAV|ITGB1|MET|PIK3CA|PTK2|RAC1|SRC|SYK|TLR4|NOD2	-7.07505	-9.27316	44.301
GO:0046456	GO Biological Processes	19	icosanoid biosynthetic process	-8.43015	21.2645	12.4867	30169	50	227	8	3.52423	1.22385	240|834|4282|5319|5742|5743|6850|8399	ALOX5|CASP1|MIF|PLA2G1B|PTGS1|PTGS2|SYK|PLA2G10	-7.07257	-15.2569	25.3149
GO:0060966	GO Biological Processes	19	regulation of gene silencing by RNA	-8.43015	21.2645	12.4867	30169	50	227	8	3.52423	1.22385	1956|2099|3569|5468|5604|6774|7015|7124	EGFR|ESR1|IL6|PPARG|MAP2K1|STAT3|TERT|TNF	-7.07257	-9.64791	41.5322
GO:0120162	GO Biological Processes	19	positive regulation of cold-induced thermogenesis	-8.42624	13.5615	10.845	30169	98	227	10	4.40529	1.36204	249|2034|3480|3717|6778|6850|7422|7852|8841|51738	ALPL|EPAS1|IGF1R|JAK2|STAT6|SYK|VEGFA|CXCR4|HDAC3|GHRL	-7.0693	-8.42624	13.5615
GO:0006140	GO Biological Processes	19	regulation of nucleotide metabolic process	-8.38284	13.4246	10.7815	30169	99	227	10	4.40529	1.36204	136|142|2033|2475|2645|3091|3356|4842|4843|6774	ADORA2B|PARP1|EP300|MTOR|GCK|HIF1A|HTR2A|NOS1|NOS2|STAT3	-7.02718	-10.5072	18.9862
GO:0043279	GO Biological Processes	19	response to alkaloid	-8.38284	13.4246	10.7815	30169	99	227	10	4.40529	1.36204	598|836|890|2185|3066|3320|3356|4988|6869|7852	BCL2L1|CASP3|CCNA2|PTK2B|HDAC2|HSP90AA1|HTR2A|OPRM1|TACR1|CXCR4	-7.02718	-8.38284	44.301
GO:0120035	GO Biological Processes	19	regulation of plasma membrane bounded cell projection organization	-8.3809	4.55431	7.92609	30169	642	227	22	9.69163	1.96358	25|207|673|2033|2146|2185|2475|2932|3066|3265|3320|3383|3480|3815|5290|5295|5604|5879|5979|6714|7046|7422	ABL1|AKT1|BRAF|EP300|EZH2|PTK2B|MTOR|GSK3B|HDAC2|HRAS|HSP90AA1|ICAM1|IGF1R|KIT|PIK3CA|PIK3R1|MAP2K1|RAC1|RET|SRC|TGFBR1|VEGFA	-7.02588	-13.9473	22.9143
GO:0050714	GO Biological Processes	19	positive regulation of protein secretion	-8.37727	11.3328	10.2402	30169	129	227	11	4.84581	1.42523	1080|2645|3091|3123|3717|5319|5467|5468|7099|9971|51738	CFTR|GCK|HIF1A|HLA-DRB1|JAK2|PLA2G1B|PPARD|PPARG|TLR4|NR1H4|GHRL	-7.02352	-26.71	29.534
GO:0051928	GO Biological Processes	19	positive regulation of calcium ion transport	-8.37727	11.3328	10.2402	30169	129	227	11	4.84581	1.42523	25|623|2147|2149|2539|3718|4638|5159|5170|5319|6548	ABL1|BDKRB1|F2|F2R|G6PD|JAK3|MYLK|PDGFRB|PDPK1|PLA2G1B|SLC9A1	-7.02352	-19.6206	16.2077
GO:0032388	GO Biological Processes	19	positive regulation of intracellular transport	-8.37378	8.68211	9.46694	30169	199	227	13	5.72687	1.5422	983|1432|2064|2932|3265|3320|3553|3717|5295|5599|5743|6469|8841	CDK1|MAPK14|ERBB2|GSK3B|HRAS|HSP90AA1|IL1B|JAK2|PIK3R1|MAPK8|PTGS2|SHH|HDAC3	-7.02067	-22.1473	26.5806
GO:0032409	GO Biological Processes	19	regulation of transporter activity	-8.37192	6.52285	8.72965	30169	326	227	16	7.04846	1.69888	596|1080|1131|1394|1612|1909|2185|3688|4318|4842|4988|5243|5468|6446|6548|54106	BCL2|CFTR|CHRM3|CRHR1|DAPK1|EDNRA|PTK2B|ITGB1|MMP9|NOS1|OPRM1|ABCB1|PPARG|SGK1|SLC9A1|TLR9	-7.01944	-8.37192	18.1231
GO:0007259	GO Biological Processes	19	receptor signaling pathway via JAK-STAT	-8.35886	20.8475	12.3516	30169	51	227	8	3.52423	1.22385	3558|3716|3717|3718|6772|6774|6777|6778	IL2|JAK1|JAK2|JAK3|STAT1|STAT3|STAT5B|STAT6	-7.00828	-13.5751	79.7419
GO:0043124	GO Biological Processes	19	negative regulation of I-kappaB kinase/NF-kappaB signaling	-8.35886	20.8475	12.3516	30169	51	227	8	3.52423	1.22385	25|841|2099|2950|3065|6772|9971|23411	ABL1|CASP8|ESR1|GSTP1|HDAC1|STAT1|NR1H4|SIRT1	-7.00828	-8.35886	20.8475
GO:1904019	GO Biological Processes	19	epithelial cell apoptotic process	-8.35886	20.8475	12.3516	30169	51	227	8	3.52423	1.22385	25|596|598|673|836|1909|7048|7124	ABL1|BCL2|BCL2L1|BRAF|CASP3|EDNRA|TGFBR2|TNF	-7.00828	-8.93912	20.9847
GO:0043393	GO Biological Processes	19	regulation of protein binding	-8.34746	8.6387	9.43722	30169	200	227	13	5.72687	1.5422	25|207|1636|2033|2932|4318|5347|5595|5599|6714|6790|7015|7046	ABL1|AKT1|ACE|EP300|GSK3B|MMP9|PLK1|MAPK3|MAPK8|SRC|AURKA|TERT|TGFBR1	-6.99854	-9.25504	10.4923
GO:0033032	GO Biological Processes	19	regulation of myeloid cell apoptotic process	-8.3466	28.1916	13.608	30169	33	227	7	3.0837	1.14742	596|3579|4282|6480|6777|23411|64127	BCL2|CXCR2|MIF|ST6GAL1|STAT5B|SIRT1|NOD2	-6.99854	-9.91433	44.301
GO:0045907	GO Biological Processes	19	positive regulation of vasoconstriction	-8.3466	28.1916	13.608	30169	33	227	7	3.0837	1.14742	25|1636|2149|3274|3356|5743|6869	ABL1|ACE|F2R|HRH2|HTR2A|PTGS2|TACR1	-6.99854	-26.7148	28.1916
GO:0048010	GO Biological Processes	19	vascular endothelial growth factor receptor signaling pathway	-8.3466	28.1916	13.608	30169	33	227	7	3.0837	1.14742	1432|2185|2321|3791|5747|6714|7422	MAPK14|PTK2B|FLT1|KDR|PTK2|SRC|VEGFA	-6.99854	-10.8933	28.1916
GO:0032874	GO Biological Processes	19	positive regulation of stress-activated MAPK cascade	-8.34173	11.2456	10.1933	30169	130	227	11	4.84581	1.42523	331|2185|3265|3553|7099|7124|7422|7498|10392|54106|64127	XIAP|PTK2B|HRAS|IL1B|TLR4|TNF|VEGFA|XDH|NOD1|TLR9|NOD2	-6.99492	-25.3768	31.6436
GO:0034754	GO Biological Processes	19	cellular hormone metabolic process	-8.34173	11.2456	10.1933	30169	130	227	11	4.84581	1.42523	1543|1544|1545|1576|1910|2099|5156|6469|6777|8694|57016	CYP1A1|CYP1A2|CYP1B1|CYP3A4|EDNRB|ESR1|PDGFRA|SHH|STAT5B|DGAT1|AKR1B10	-6.99492	-12.4171	66.4515
GO:0007200	GO Biological Processes	19	phospholipase C-activating G protein-coupled receptor signaling pathway	-8.33993	13.2903	10.7189	30169	100	227	10	4.40529	1.36204	185|887|1910|2099|2149|3356|3579|4988|5733|6869	AGTR1|CCKBR|EDNRB|ESR1|F2R|HTR2A|CXCR2|OPRM1|PTGER3|TACR1	-6.99374	-27.9408	19.1751
GO:0001503	GO Biological Processes	19	ossification	-8.3305	7.04433	8.89515	30169	283	227	15	6.60793	1.64883	207|249|596|1432|1956|2247|2735|3091|3486|3488|4313|4318|4323|5743|6469	AKT1|ALPL|BCL2|MAPK14|EGFR|FGF2|GLI1|HIF1A|IGFBP3|IGFBP5|MMP2|MMP9|MMP14|PTGS2|SHH	-6.98494	-12.9368	17.7204
GO:0045786	GO Biological Processes	19	negative regulation of cell cycle	-8.32779	6.00892	8.50994	30169	376	227	17	7.48899	1.74701	25|472|595|596|836|983|1017|1432|2146|3248|4193|5347|5743|5781|7124|11200|23411	ABL1|ATM|CCND1|BCL2|CASP3|CDK1|CDK2|MAPK14|EZH2|HPGD|MDM2|PLK1|PTGS2|PTPN11|TNF|CHEK2|SIRT1	-6.98286	-10.5861	22.9143
GO:0043010	GO Biological Processes	19	camera-type eye development	-8.31538	6.46337	8.67571	30169	329	227	16	7.04846	1.69888	1543|1545|1956|2321|3065|3066|3091|3791|5156|5159|5979|6469|6774|7046|7048|7422	CYP1A1|CYP1B1|EGFR|FLT1|HDAC1|HDAC2|HIF1A|KDR|PDGFRA|PDGFRB|RET|SHH|STAT3|TGFBR1|TGFBR2|VEGFA	-6.97169	-17.1338	20.1368
GO:0060537	GO Biological Processes	19	muscle tissue development	-8.31538	6.46337	8.67571	30169	329	227	16	7.04846	1.69888	25|596|983|1432|1909|2033|2475|3688|4638|5156|5159|5915|6469|6548|7046|7422	ABL1|BCL2|CDK1|MAPK14|EDNRA|EP300|MTOR|ITGB1|MYLK|PDGFRA|PDGFRB|RARB|SHH|SLC9A1|TGFBR1|VEGFA	-6.97169	-11.1994	132.903
GO:0097696	GO Biological Processes	19	receptor signaling pathway via STAT	-8.28911	20.4466	12.2204	30169	52	227	8	3.52423	1.22385	3558|3716|3717|3718|6772|6774|6777|6778	IL2|JAK1|JAK2|JAK3|STAT1|STAT3|STAT5B|STAT6	-6.94604	-13.5751	79.7419
GO:0042770	GO Biological Processes	19	signal transduction in response to DNA damage	-8.27156	11.0753	10.1009	30169	132	227	11	4.84581	1.42523	25|472|595|983|1017|1432|4193|4282|5347|5781|11200	ABL1|ATM|CCND1|CDK1|CDK2|MAPK14|MDM2|MIF|PLK1|PTPN11|CHEK2	-6.92973	-10.5861	22.9143
GO:0070304	GO Biological Processes	19	positive regulation of stress-activated protein kinase signaling cascade	-8.27156	11.0753	10.1009	30169	132	227	11	4.84581	1.42523	331|2185|3265|3553|7099|7124|7422|7498|10392|54106|64127	XIAP|PTK2B|HRAS|IL1B|TLR4|TNF|VEGFA|XDH|NOD1|TLR9|NOD2	-6.92973	-25.3768	31.6436
GO:0032890	GO Biological Processes	19	regulation of organic acid transport	-8.26892	15.9484	11.2857	30169	75	227	9	3.96476	1.29512	134|207|383|3553|3688|4282|6850|7124|8399	ADORA1|AKT1|ARG1|IL1B|ITGB1|MIF|SYK|TNF|PLA2G10	-6.9277	-8.65095	49.8387
GO:0019218	GO Biological Processes	19	regulation of steroid metabolic process	-8.25552	13.0297	10.5963	30169	102	227	10	4.40529	1.36204	2246|2908|3480|3815|4790|6097|6777|7124|9971|23411	FGF1|NR3C1|IGF1R|KIT|NFKB1|RORC|STAT5B|TNF|NR1H4|SIRT1	-6.91492	-8.25552	21.2645
GO:0038034	GO Biological Processes	19	signal transduction in absence of ligand	-8.24926	27.3624	13.3917	30169	34	227	7	3.0837	1.14742	596|598|2932|3553|3558|3685|4170	BCL2|BCL2L1|GSK3B|IL1B|IL2|ITGAV|MCL1	-6.91113	-12.9737	27.3624
GO:0061081	GO Biological Processes	19	positive regulation of myeloid leukocyte cytokine production involved in immune response	-8.24926	27.3624	13.3917	30169	34	227	7	3.0837	1.14742	3815|4282|6850|7099|10392|23411|64127	KIT|MIF|SYK|TLR4|NOD1|SIRT1|NOD2	-6.91113	-8.24926	59.068
GO:0070741	GO Biological Processes	19	response to interleukin-6	-8.24926	27.3624	13.3917	30169	34	227	7	3.0837	1.14742	3569|3572|3716|3717|4790|6714|6774	IL6|IL6ST|JAK1|JAK2|NFKB1|SRC|STAT3	-6.91113	-18.9652	56.9585
GO:0097192	GO Biological Processes	19	extrinsic apoptotic signaling pathway in absence of ligand	-8.24926	27.3624	13.3917	30169	34	227	7	3.0837	1.14742	596|598|2932|3553|3558|3685|4170	BCL2|BCL2L1|GSK3B|IL1B|IL2|ITGAV|MCL1	-6.91113	-12.9737	27.3624
GO:0042391	GO Biological Processes	19	regulation of membrane potential	-8.24853	5.55048	8.28487	30169	431	227	18	7.92952	1.79337	25|134|142|207|596|598|1080|1269|2185|2475|2932|3791|4988|6548|6714|6869|7124|51738	ABL1|ADORA1|PARP1|AKT1|BCL2|BCL2L1|CFTR|CNR2|PTK2B|MTOR|GSK3B|KDR|OPRM1|SLC9A1|SRC|TACR1|TNF|GHRL	-6.91101	-8.24853	29.534
GO:0051493	GO Biological Processes	19	regulation of cytoskeleton organization	-8.23612	4.93147	8.01917	30169	539	227	20	8.81057	1.88131	25|673|2185|2475|2932|3265|4233|5156|5159|5290|5295|5347|5594|5595|5734|5747|5879|6548|6869|7046	ABL1|BRAF|PTK2B|MTOR|GSK3B|HRAS|MET|PDGFRA|PDGFRB|PIK3CA|PIK3R1|PLK1|MAPK1|MAPK3|PTGER4|PTK2|RAC1|SLC9A1|TACR1|TGFBR1	-6.89921	-13.9473	22.9143
GO:0071622	GO Biological Processes	19	regulation of granulocyte chemotaxis	-8.22085	20.0608	12.0928	30169	53	227	8	3.52423	1.22385	1803|3576|3579|5594|5595|5747|5879|64127	DPP4|CXCL8|CXCR2|MAPK1|MAPK3|PTK2|RAC1|NOD2	-6.88455	-23.5059	20.0608
GO:0045685	GO Biological Processes	19	regulation of glial cell differentiation	-8.21701	15.7385	11.2014	30169	76	227	9	3.96476	1.29512	983|2147|2475|3065|3066|3569|3572|6469|7852	CDK1|F2|MTOR|HDAC1|HDAC2|IL6|IL6ST|SHH|CXCR4	-6.88193	-18.317	26.5806
GO:0046425	GO Biological Processes	19	regulation of receptor signaling pathway via JAK-STAT	-8.21701	15.7385	11.2014	30169	76	227	9	3.96476	1.29512	1545|2147|2149|2185|3569|3717|3718|3815|7124	CYP1B1|F2|F2R|PTK2B|IL6|JAK2|JAK3|KIT|TNF	-6.88193	-18.9652	56.9585
GO:0031344	GO Biological Processes	19	regulation of cell projection organization	-8.17576	4.43683	7.76714	30169	659	227	22	9.69163	1.96358	25|207|673|2033|2146|2185|2475|2932|3066|3265|3320|3383|3480|3815|5290|5295|5604|5879|5979|6714|7046|7422	ABL1|AKT1|BRAF|EP300|EZH2|PTK2B|MTOR|GSK3B|HDAC2|HRAS|HSP90AA1|ICAM1|IGF1R|KIT|PIK3CA|PIK3R1|MAP2K1|RAC1|RET|SRC|TGFBR1|VEGFA	-6.84129	-13.9473	22.9143
GO:0002065	GO Biological Processes	19	columnar/cuboidal epithelial cell differentiation	-8.17295	12.7791	10.4772	30169	104	227	10	4.40529	1.36204	25|2247|3091|3172|3572|5170|5241|5915|6714|7298	ABL1|FGF2|HIF1A|HNF4A|IL6ST|PDPK1|PGR|RARB|SRC|TYMS	-6.83969	-17.2451	37.9723
GO:0110020	GO Biological Processes	19	regulation of actomyosin structure organization	-8.17295	12.7791	10.4772	30169	104	227	10	4.40529	1.36204	25|673|2475|4233|5295|5734|5879|6548|6869|7046	ABL1|BRAF|MTOR|MET|PIK3R1|PTGER4|RAC1|SLC9A1|TACR1|TGFBR1	-6.83969	-13.9473	22.9143
GO:0060627	GO Biological Processes	19	regulation of vesicle-mediated transport	-8.16883	4.88614	7.96407	30169	544	227	20	8.81057	1.88131	25|136|673|949|1080|2932|3356|3553|3685|5054|5170|5594|5595|5604|5879|6714|6850|7124|7422|64127	ABL1|ADORA2B|BRAF|SCARB1|CFTR|GSK3B|HTR2A|IL1B|ITGAV|SERPINE1|PDPK1|MAPK1|MAPK3|MAP2K1|RAC1|SRC|SYK|TNF|VEGFA|NOD2	-6.83618	-8.16883	4.88614
GO:0007178	GO Biological Processes	19	transmembrane receptor protein serine/threonine kinase signaling pathway	-8.16734	8.34657	9.23486	30169	207	227	13	5.72687	1.5422	25|142|1432|3172|3248|5468|5595|5747|6714|6774|7046|7048|23411	ABL1|PARP1|MAPK14|HNF4A|HPGD|PPARG|MAPK3|PTK2|SRC|STAT3|TGFBR1|TGFBR2|SIRT1	-6.8353	-9.5033	10.7313
GO:0031279	GO Biological Processes	19	regulation of cyclase activity	-8.16585	15.5341	11.1187	30169	77	227	9	3.96476	1.29512	136|1394|1432|1909|1910|4842|4843|5595|5599	ADORA2B|CRHR1|MAPK14|EDNRA|EDNRB|NOS1|NOS2|MAPK3|MAPK8	-6.83502	-8.50307	44.301
GO:0032729	GO Biological Processes	19	positive regulation of interferon-gamma production	-8.16585	15.5341	11.1187	30169	77	227	9	3.96476	1.29512	25|3105|3265|3553|3558|3717|7099|7124|54106	ABL1|HLA-A|HRAS|IL1B|IL2|JAK2|TLR4|TNF|TLR9	-6.83502	-25.3768	31.6436
GO:0001893	GO Biological Processes	19	maternal placenta development	-8.15513	26.5806	13.1845	30169	35	227	7	3.0837	1.14742	142|207|1508|5467|5743|7421|51738	PARP1|AKT1|CTSB|PPARD|PTGS2|VDR|GHRL	-6.8267	-20.2052	31.8967
GO:1901099	GO Biological Processes	19	negative regulation of signal transduction in absence of ligand	-8.15513	26.5806	13.1845	30169	35	227	7	3.0837	1.14742	207|596|598|3553|4170|7015|7124	AKT1|BCL2|BCL2L1|IL1B|MCL1|TERT|TNF	-6.8267	-12.9737	27.3624
GO:2000352	GO Biological Processes	19	negative regulation of endothelial cell apoptotic process	-8.15513	26.5806	13.1845	30169	35	227	7	3.0837	1.14742	25|673|3383|3791|5054|5170|7015	ABL1|BRAF|ICAM1|KDR|SERPINE1|PDPK1|TERT	-6.8267	-12.9175	26.5806
GO:2001240	GO Biological Processes	19	negative regulation of extrinsic apoptotic signaling pathway in absence of ligand	-8.15513	26.5806	13.1845	30169	35	227	7	3.0837	1.14742	207|596|598|3553|4170|7015|7124	AKT1|BCL2|BCL2L1|IL1B|MCL1|TERT|TNF	-6.8267	-12.9737	27.3624
GO:0007623	GO Biological Processes	19	circadian rhythm	-8.13474	10.7495	9.92199	30169	136	227	11	4.84581	1.42523	196|2033|2932|3065|3066|4843|6097|7124|7298|8841|23411	AHR|EP300|GSK3B|HDAC1|HDAC2|NOS2|RORC|TNF|TYMS|HDAC3|SIRT1	-6.80691	-8.13474	56.9585
GO:0043154	GO Biological Processes	19	negative regulation of cysteine-type endopeptidase activity involved in apoptotic process	-8.11543	15.335	11.0375	30169	78	227	9	3.96476	1.29512	207|330|331|2168|4318|5743|6714|7124|7422	AKT1|BIRC3|XIAP|FABP1|MMP9|PTGS2|SRC|TNF|VEGFA	-6.7882	-9.38736	15.335
GO:0007596	GO Biological Processes	19	blood coagulation	-8.09283	9.27231	9.47322	30169	172	227	12	5.28634	1.48515	1432|2147|2149|2152|2162|3172|3569|5156|5290|6469|6714|6850	MAPK14|F2|F2R|F3|F13A1|HNF4A|IL6|PDGFRA|PIK3CA|SHH|SRC|SYK	-6.76739	-29.2377	11.7003
GO:0048762	GO Biological Processes	19	mesenchymal cell differentiation	-8.09283	9.27231	9.47322	30169	172	227	12	5.28634	1.48515	596|1909|1910|2260|2932|3091|5594|5595|5979|6469|6772|7046	BCL2|EDNRA|EDNRB|FGFR1|GSK3B|HIF1A|MAPK1|MAPK3|RET|SHH|STAT1|TGFBR1	-6.76739	-12.0673	33.2258
GO:1905475	GO Biological Processes	19	regulation of protein localization to membrane	-8.09283	9.27231	9.47322	30169	172	227	12	5.28634	1.48515	207|367|598|1956|2064|3265|3688|4323|5170|5295|5599|7124	AKT1|AR|BCL2L1|EGFR|ERBB2|HRAS|ITGB1|MMP14|PDPK1|PIK3R1|MAPK8|TNF	-6.76739	-8.5226	13.5156
GO:0033273	GO Biological Processes	19	response to vitamin	-8.06573	15.1409	10.9578	30169	79	227	9	3.96476	1.29512	249|383|595|1543|3480|5467|5743|7298|7421	ALPL|ARG1|CCND1|CYP1A1|IGF1R|PPARD|PTGS2|TYMS|VDR	-6.74088	-8.06573	44.301
GO:0055080	GO Biological Processes	19	cation homeostasis	-8.05609	5.0808	7.98723	30169	497	227	19	8.37004	1.8381	134|249|331|479|596|887|1080|1909|1910|1991|2034|2147|3091|3356|3791|5594|5595|6548|7421	ADORA1|ALPL|XIAP|ATP12A|BCL2|CCKBR|CFTR|EDNRA|EDNRB|ELANE|EPAS1|F2|HIF1A|HTR2A|KDR|MAPK1|MAPK3|SLC9A1|VDR	-6.73184	-13.0748	10.7396
GO:0005996	GO Biological Processes	19	monosaccharide metabolic process	-8.0363	9.16573	9.4057	30169	174	227	12	5.28634	1.48515	207|1432|2539|2548|2645|4351|5290|5315|5467|7124|10327|51738	AKT1|MAPK14|G6PD|GAA|GCK|MPI|PIK3CA|PKM|PPARD|TNF|AKR1A1|GHRL	-6.71323	-10.1459	11.7613
GO:0050817	GO Biological Processes	19	coagulation	-8.0363	9.16573	9.4057	30169	174	227	12	5.28634	1.48515	1432|2147|2149|2152|2162|3172|3569|5156|5290|6469|6714|6850	MAPK14|F2|F2R|F3|F13A1|HNF4A|IL6|PDGFRA|PIK3CA|SHH|SRC|SYK	-6.71323	-29.2377	11.7003
GO:0007254	GO Biological Processes	19	JNK cascade	-8.02442	18.9862	11.7301	30169	56	227	8	3.52423	1.22385	3553|4790|5599|5734|7099|7124|10392|64127	IL1B|NFKB1|MAPK8|PTGER4|TLR4|TNF|NOD1|NOD2	-6.70254	-25.5879	31.4135
GO:0010718	GO Biological Processes	19	positive regulation of epithelial to mesenchymal transition	-8.02442	18.9862	11.7301	30169	56	227	8	3.52423	1.22385	2146|2475|3066|3553|3569|5747|7046|7048	EZH2|MTOR|HDAC2|IL1B|IL6|PTK2|TGFBR1|TGFBR2	-6.70254	-8.02442	18.9862
GO:1902806	GO Biological Processes	19	regulation of cell cycle G1/S phase transition	-8.01842	8.11146	9.06885	30169	213	227	13	5.72687	1.5422	207|472|595|596|894|1017|1543|1956|2146|2735|4193|7015|11200	AKT1|ATM|CCND1|BCL2|CCND2|CDK2|CYP1A1|EGFR|EZH2|GLI1|MDM2|TERT|CHEK2	-6.69713	-15.1858	23.7327
GO:0032231	GO Biological Processes	19	regulation of actin filament bundle assembly	-8.01301	12.3058	10.2485	30169	108	227	10	4.40529	1.36204	25|673|2475|4233|5295|5734|5879|6548|6869|7046	ABL1|BRAF|MTOR|MET|PIK3R1|PTGER4|RAC1|SLC9A1|TACR1|TGFBR1	-6.69289	-13.9473	22.9143
GO:0050852	GO Biological Processes	19	T cell receptor signaling pathway	-8.01301	12.3058	10.2485	30169	108	227	10	4.40529	1.36204	25|673|3105|3123|3265|3551|5290|5594|8517|10892	ABL1|BRAF|HLA-A|HLA-DRB1|HRAS|IKBKB|PIK3CA|MAPK1|IKBKG|MALT1	-6.69289	-18.9163	12.3058
GO:0060439	GO Biological Processes	19	trachea morphogenesis	-7.98817	60.4105	17.1595	30169	11	227	5	2.20264	0.974143	5594|5595|5604|6469|7048	MAPK1|MAPK3|MAP2K1|SHH|TGFBR2	-6.66865	-10.119	99.6773
GO:0000086	GO Biological Processes	19	G2/M transition of mitotic cell cycle	-7.96155	18.6531	11.6154	30169	57	227	8	3.52423	1.22385	890|891|983|1017|5243|5347|6790|11200	CCNA2|CCNB1|CDK1|CDK2|ABCB1|PLK1|AURKA|CHEK2	-6.64378	-15.1858	23.7327
GO:0002444	GO Biological Processes	19	myeloid leukocyte mediated immunity	-7.96155	18.6531	11.6154	30169	57	227	8	3.52423	1.22385	136|1636|1991|2147|3569|3815|5319|6850	ADORA2B|ACE|ELANE|F2|IL6|KIT|PLA2G1B|SYK	-6.64378	-13.99	28.892
GO:0033209	GO Biological Processes	19	tumor necrosis factor-mediated signaling pathway	-7.96155	18.6531	11.6154	30169	57	227	8	3.52423	1.22385	330|1147|2185|3551|3717|6772|7124|7132	BIRC3|CHUK|PTK2B|IKBKB|JAK2|STAT1|TNF|TNFRSF1A	-6.64378	-33.8084	18.6531
GO:0007599	GO Biological Processes	19	hemostasis	-7.95287	9.01038	9.30642	30169	177	227	12	5.28634	1.48515	1432|2147|2149|2152|2162|3172|3569|5156|5290|6469|6714|6850	MAPK14|F2|F2R|F3|F13A1|HNF4A|IL6|PDGFRA|PIK3CA|SHH|SRC|SYK	-6.63569	-29.2377	11.7003
GO:0010803	GO Biological Processes	19	regulation of tumor necrosis factor-mediated signaling pathway	-7.89989	18.3315	11.5036	30169	58	227	8	3.52423	1.22385	331|834|841|2950|3551|6850|7132|9971	XIAP|CASP1|CASP8|GSTP1|IKBKB|SYK|TNFRSF1A|NR1H4	-6.58388	-11.1136	19.6893
GO:0019369	GO Biological Processes	19	arachidonic acid metabolic process	-7.89989	18.3315	11.5036	30169	58	227	8	3.52423	1.22385	240|1543|1544|1545|1557|5742|5743|8399	ALOX5|CYP1A1|CYP1A2|CYP1B1|CYP2C19|PTGS1|PTGS2|PLA2G10	-6.58388	-15.2569	25.3149
GO:0001676	GO Biological Processes	19	long-chain fatty acid metabolic process	-7.89735	11.9733	10.0847	30169	111	227	10	4.40529	1.36204	240|1543|1544|1545|1557|1576|2950|5742|5743|8399	ALOX5|CYP1A1|CYP1A2|CYP1B1|CYP2C19|CYP3A4|GSTP1|PTGS1|PTGS2|PLA2G10	-6.58192	-15.2569	25.3149
GO:0070661	GO Biological Processes	19	leukocyte proliferation	-7.87424	10.1523	9.58554	30169	144	227	11	4.84581	1.42523	25|596|598|1636|2064|3558|3815|6469|6777|7099|10892	ABL1|BCL2|BCL2L1|ACE|ERBB2|IL2|KIT|SHH|STAT5B|TLR4|MALT1	-6.55945	-7.87424	56.9585
GO:0070098	GO Biological Processes	19	chemokine-mediated signaling pathway	-7.87372	14.4112	10.6529	30169	83	227	9	3.96476	1.29512	1234|2185|2833|3576|3577|3579|7852|10803|57007	CCR5|PTK2B|CXCR3|CXCL8|CXCR1|CXCR2|CXCR4|CCR9|ACKR3	-6.55945	-17.3867	29.534
GO:0001678	GO Biological Processes	19	cellular glucose homeostasis	-7.85957	11.8663	10.0315	30169	112	227	10	4.40529	1.36204	1636|2645|3091|3383|3480|5290|5295|7494|9971|23411	ACE|GCK|HIF1A|ICAM1|IGF1R|PIK3CA|PIK3R1|XBP1|NR1H4|SIRT1	-6.54589	-13.44	12.7791
GO:0098771	GO Biological Processes	19	inorganic ion homeostasis	-7.84933	4.93195	7.81313	30169	512	227	19	8.37004	1.8381	134|249|331|479|596|887|1080|1909|1910|1991|2034|2147|3091|3356|3791|5594|5595|6548|7421	ADORA1|ALPL|XIAP|ATP12A|BCL2|CCKBR|CFTR|EDNRA|EDNRB|ELANE|EPAS1|F2|HIF1A|HTR2A|KDR|MAPK1|MAPK3|SLC9A1|VDR	-6.53622	-13.0748	10.7396
GO:0010574	GO Biological Processes	19	regulation of vascular endothelial growth factor production	-7.83942	18.0208	11.3945	30169	59	227	8	3.52423	1.22385	136|1545|3091|3553|3569|3572|5743|10855	ADORA2B|CYP1B1|HIF1A|IL1B|IL6|IL6ST|PTGS2|HPSE	-6.52747	-10.4684	36.6629
GO:0042306	GO Biological Processes	19	regulation of protein import into nucleus	-7.83942	18.0208	11.3945	30169	59	227	8	3.52423	1.22385	983|1432|3320|3717|5295|5743|6469|8841	CDK1|MAPK14|HSP90AA1|JAK2|PIK3R1|PTGS2|SHH|HDAC3	-6.52747	-22.1473	26.5806
GO:0006006	GO Biological Processes	19	glucose metabolic process	-7.82217	11.7613	9.97897	30169	113	227	10	4.40529	1.36204	207|1432|2539|2548|2645|5290|5315|5467|7124|51738	AKT1|MAPK14|G6PD|GAA|GCK|PIK3CA|PKM|PPARD|TNF|GHRL	-6.5108	-10.1459	11.7613
GO:0060965	GO Biological Processes	19	negative regulation of miRNA-mediated gene silencing	-7.81231	34.6704	14.0651	30169	23	227	6	2.64317	1.06471	2099|3569|5468|6774|7015|7124	ESR1|IL6|PPARG|STAT3|TERT|TNF	-6.50151	-9.64791	41.5322
GO:0002274	GO Biological Processes	19	myeloid leukocyte activation	-7.81167	10.0132	9.50553	30169	146	227	11	4.84581	1.42523	136|3576|3579|3717|3815|6850|7048|7099|7124|8399|54106	ADORA2B|CXCL8|CXCR2|JAK2|KIT|SYK|TGFBR2|TLR4|TNF|PLA2G10|TLR9	-6.50144	-25.3768	31.6436
GO:0060978	GO Biological Processes	19	angiogenesis involved in coronary vascular morphogenesis	-7.8092	106.322	20.5072	30169	5	227	4	1.76211	0.87326	1636|2247|5159|7046	ACE|FGF2|PDGFRB|TGFBR1	-6.49955	-7.8092	106.322
GO:0006692	GO Biological Processes	19	prostanoid metabolic process	-7.8069	23.8544	12.4351	30169	39	227	7	3.0837	1.14742	2950|3248|4282|5742|5743|7132|8399	GSTP1|HPGD|MIF|PTGS1|PTGS2|TNFRSF1A|PLA2G10	-6.49898	-15.2569	25.3149
GO:0006693	GO Biological Processes	19	prostaglandin metabolic process	-7.8069	23.8544	12.4351	30169	39	227	7	3.0837	1.14742	2950|3248|4282|5742|5743|7132|8399	GSTP1|HPGD|MIF|PTGS1|PTGS2|TNFRSF1A|PLA2G10	-6.49898	-15.2569	25.3149
GO:0009595	GO Biological Processes	19	detection of biotic stimulus	-7.8069	23.8544	12.4351	30169	39	227	7	3.0837	1.14742	949|3105|3123|7099|10392|64127|114548	SCARB1|HLA-A|HLA-DRB1|TLR4|NOD1|NOD2|NLRP3	-6.49898	-8.24926	59.068
GO:0000082	GO Biological Processes	19	G1/S transition of mitotic cell cycle	-7.78154	14.0721	10.5083	30169	85	227	9	3.96476	1.29512	595|596|894|1017|1019|2146|3688|6198|23476	CCND1|BCL2|CCND2|CDK2|CDK4|EZH2|ITGB1|RPS6KB1|BRD4	-6.475	-15.1858	23.7327
GO:0120161	GO Biological Processes	19	regulation of cold-induced thermogenesis	-7.78074	9.94513	9.4661	30169	147	227	11	4.84581	1.42523	249|2034|3480|3717|6778|6850|7099|7422|7852|8841|51738	ALPL|EPAS1|IGF1R|JAK2|STAT6|SYK|TLR4|VEGFA|CXCR4|HDAC3|GHRL	-6.475	-8.42624	13.5615
GO:0006939	GO Biological Processes	19	smooth muscle contraction	-7.78007	17.7204	11.2881	30169	60	227	8	3.52423	1.22385	624|1131|1909|1910|3356|4638|5733|6869	BDKRB2|CHRM3|EDNRA|EDNRB|HTR2A|MYLK|PTGER3|TACR1	-6.475	-26.7148	28.1916
GO:1903670	GO Biological Processes	19	regulation of sprouting angiogenesis	-7.78007	17.7204	11.2881	30169	60	227	8	3.52423	1.22385	240|2246|2247|3716|5170|5315|7422|51738	ALOX5|FGF1|FGF2|JAK1|PDPK1|PKM|VEGFA|GHRL	-6.475	-8.88999	39.8709
GO:2000351	GO Biological Processes	19	regulation of endothelial cell apoptotic process	-7.78007	17.7204	11.2881	30169	60	227	8	3.52423	1.22385	25|673|3383|3791|5054|5170|7015|7124	ABL1|BRAF|ICAM1|KDR|SERPINE1|PDPK1|TERT|TNF	-6.475	-12.9175	26.5806
GO:1902107	GO Biological Processes	19	positive regulation of leukocyte differentiation	-7.76434	8.66759	9.08368	30169	184	227	12	5.28634	1.48515	841|3123|3558|4323|6469|6777|6850|7048|7124|7494|10892|114548	CASP8|HLA-DRB1|IL2|MMP14|SHH|STAT5B|SYK|TGFBR2|TNF|XBP1|MALT1|NLRP3	-6.4604	-28.2991	25.5583
GO:1903708	GO Biological Processes	19	positive regulation of hemopoiesis	-7.76434	8.66759	9.08368	30169	184	227	12	5.28634	1.48515	841|3123|3558|4323|6469|6777|6850|7048|7124|7494|10892|114548	CASP8|HLA-DRB1|IL2|MMP14|SHH|STAT5B|SYK|TGFBR2|TNF|XBP1|MALT1|NLRP3	-6.4604	-28.2991	25.5583
GO:0031650	GO Biological Processes	19	regulation of heat generation	-7.75676	55.3763	16.4041	30169	12	227	5	2.20264	0.974143	1910|3553|5733|5743|7124	EDNRB|IL1B|PTGER3|PTGS2|TNF	-6.45339	-11.6147	75.9446
GO:0046634	GO Biological Processes	19	regulation of alpha-beta T cell activation	-7.74848	11.5568	9.87587	30169	115	227	10	4.40529	1.36204	3105|3123|3558|3717|3718|6469|6850|7048|10892|114548	HLA-A|HLA-DRB1|IL2|JAK2|JAK3|SHH|SYK|TGFBR2|MALT1|NLRP3	-6.44623	-28.2991	25.5583
GO:0071674	GO Biological Processes	19	mononuclear cell migration	-7.74848	11.5568	9.87587	30169	115	227	10	4.40529	1.36204	240|1234|2321|3383|3569|3577|3579|3695|5979|7852	ALOX5|CCR5|FLT1|ICAM1|IL6|CXCR1|CXCR2|ITGB7|RET|CXCR4	-6.44623	-17.3867	29.534
GO:2000045	GO Biological Processes	19	regulation of G1/S transition of mitotic cell cycle	-7.73807	8.62074	9.05282	30169	185	227	12	5.28634	1.48515	207|472|595|596|894|1017|1543|1956|2146|4193|7015|11200	AKT1|ATM|CCND1|BCL2|CCND2|CDK2|CYP1A1|EGFR|EZH2|MDM2|TERT|CHEK2	-6.43639	-15.1858	23.7327
GO:0044839	GO Biological Processes	19	cell cycle G2/M phase transition	-7.72182	17.4299	11.1842	30169	61	227	8	3.52423	1.22385	890|891|983|1017|5243|5347|6790|11200	CCNA2|CCNB1|CDK1|CDK2|ABCB1|PLK1|AURKA|CHEK2	-6.42127	-15.1858	23.7327
GO:1902893	GO Biological Processes	19	regulation of miRNA transcription	-7.72182	17.4299	11.1842	30169	61	227	8	3.52423	1.22385	2247|2908|3091|5467|5468|6774|7015|7124	FGF2|NR3C1|HIF1A|PPARD|PPARG|STAT3|TERT|TNF	-6.42127	-9.64791	41.5322
GO:0007420	GO Biological Processes	19	brain development	-7.71439	4.01151	7.33132	30169	762	227	23	10.1322	2.00281	25|472|596|836|1636|1956|2146|2247|2539|2735|2932|3065|3091|3480|3579|3688|5604|5781|5915|6469|6714|7048|7852	ABL1|ATM|BCL2|CASP3|ACE|EGFR|EZH2|FGF2|G6PD|GLI1|GSK3B|HDAC1|HIF1A|IGF1R|CXCR2|ITGB1|MAP2K1|PTPN11|RARB|SHH|SRC|TGFBR2|CXCR4	-6.4144	-7.71439	8.10385
GO:0015849	GO Biological Processes	19	organic acid transport	-7.7116	6.91689	8.4875	30169	269	227	14	6.1674	1.59667	624|1636|2168|2169|4363|5243|5319|5320|5467|5468|6198|6555|8399|9429	BDKRB2|ACE|FABP1|FABP2|ABCC1|ABCB1|PLA2G1B|PLA2G2A|PPARD|PPARG|RPS6KB1|SLC10A2|PLA2G10|ABCG2	-6.41217	-15.1054	31.0107
GO:0022412	GO Biological Processes	19	cellular process involved in reproduction in multicellular organism	-7.69609	5.44422	7.93767	30169	415	227	17	7.48899	1.74701	207|472|596|598|1080|1909|2185|2475|2735|3688|3815|5347|6198|6714|6790|7046|7153	AKT1|ATM|BCL2|BCL2L1|CFTR|EDNRA|PTK2B|MTOR|GLI1|ITGB1|KIT|PLK1|RPS6KB1|SRC|AURKA|TGFBR1|TOP2A	-6.39722	-9.85137	11.442
GO:0048864	GO Biological Processes	19	stem cell development	-7.69176	13.7486	10.3685	30169	87	227	9	3.96476	1.29512	596|1909|1910|2247|3091|5594|5595|5979|6469	BCL2|EDNRA|EDNRB|FGF2|HIF1A|MAPK1|MAPK3|RET|SHH	-6.39514	-12.0673	33.2258
GO:2000243	GO Biological Processes	19	positive regulation of reproductive process	-7.69176	13.7486	10.3685	30169	87	227	9	3.96476	1.29512	367|1910|3066|6469|6714|6790|6869|7422|8399	AR|EDNRB|HDAC2|SHH|SRC|AURKA|TACR1|VEGFA|PLA2G10	-6.39514	-7.69176	22.1505
GO:0038084	GO Biological Processes	19	vascular endothelial growth factor signaling pathway	-7.6901	33.2258	13.7514	30169	24	227	6	2.64317	1.06471	2321|3791|5156|5159|5290|7422	FLT1|KDR|PDGFRA|PDGFRB|PIK3CA|VEGFA	-6.39514	-11.1994	132.903
GO:0060149	GO Biological Processes	19	negative regulation of post-transcriptional gene silencing	-7.6901	33.2258	13.7514	30169	24	227	6	2.64317	1.06471	2099|3569|5468|6774|7015|7124	ESR1|IL6|PPARG|STAT3|TERT|TNF	-6.39514	-9.64791	41.5322
GO:0060967	GO Biological Processes	19	negative regulation of gene silencing by RNA	-7.6901	33.2258	13.7514	30169	24	227	6	2.64317	1.06471	2099|3569|5468|6774|7015|7124	ESR1|IL6|PPARG|STAT3|TERT|TNF	-6.39514	-9.64791	41.5322
GO:1900369	GO Biological Processes	19	negative regulation of post-transcriptional gene silencing by RNA	-7.6901	33.2258	13.7514	30169	24	227	6	2.64317	1.06471	2099|3569|5468|6774|7015|7124	ESR1|IL6|PPARG|STAT3|TERT|TNF	-6.39514	-9.64791	41.5322
GO:2001026	GO Biological Processes	19	regulation of endothelial cell chemotaxis	-7.6901	33.2258	13.7514	30169	24	227	6	2.64317	1.06471	2246|2247|2260|3791|4233|7422	FGF1|FGF2|FGFR1|KDR|MET|VEGFA	-6.39514	-18.7692	49.8387
GO:0050801	GO Biological Processes	19	ion homeostasis	-7.6761	4.80983	7.66765	30169	525	227	19	8.37004	1.8381	134|249|331|479|596|887|1080|1909|1910|1991|2034|2147|3091|3356|3791|5594|5595|6548|7421	ADORA1|ALPL|XIAP|ATP12A|BCL2|CCKBR|CFTR|EDNRA|EDNRB|ELANE|EPAS1|F2|HIF1A|HTR2A|KDR|MAPK1|MAPK3|SLC9A1|VDR	-6.38169	-13.0748	10.7396
GO:0002260	GO Biological Processes	19	lymphocyte homeostasis	-7.66463	17.1488	11.0828	30169	62	227	8	3.52423	1.22385	25|207|596|836|3091|3718|6777|11035	ABL1|AKT1|BCL2|CASP3|HIF1A|JAK3|STAT5B|RIPK3	-6.37133	-8.93912	20.9847
GO:0032963	GO Biological Processes	19	collagen metabolic process	-7.66463	17.1488	11.0828	30169	62	227	8	3.52423	1.22385	383|1508|3091|4313|4314|4316|4318|4323	ARG1|CTSB|HIF1A|MMP2|MMP3|MMP7|MMP9|MMP14	-6.37133	-7.66463	20.2244
GO:0002833	GO Biological Processes	19	positive regulation of response to biotic stimulus	-7.66024	8.48318	8.96164	30169	188	227	12	5.28634	1.48515	383|2033|3123|3320|3551|4282|6714|6777|6850|7099|54106|64127	ARG1|EP300|HLA-DRB1|HSP90AA1|IKBKB|MIF|SRC|STAT5B|SYK|TLR4|TLR9|NOD2	-6.3675	-16.2489	24.1642
GO:0071470	GO Biological Processes	19	cellular response to osmotic stress	-7.6476	22.6908	12.1012	30169	41	227	7	3.0837	1.14742	624|834|836|2475|4638|5743|114548	BDKRB2|CASP1|CASP3|MTOR|MYLK|PTGS2|NLRP3	-6.35596	-10.7656	28.4792
GO:0150077	GO Biological Processes	19	regulation of neuroinflammatory response	-7.6476	22.6908	12.1012	30169	41	227	7	3.0837	1.14742	472|3553|3569|4314|4318|5743|7124	ATM|IL1B|IL6|MMP3|MMP9|PTGS2|TNF	-6.35596	-11.6147	75.9446
GO:0034644	GO Biological Processes	19	cellular response to UV	-7.60426	13.4396	10.2332	30169	89	227	9	3.96476	1.29512	142|2033|4311|4313|4314|4318|5295|5743|23411	PARP1|EP300|MME|MMP2|MMP3|MMP9|PIK3R1|PTGS2|SIRT1	-6.31317	-19.0999	66.4515
GO:0014706	GO Biological Processes	19	striated muscle tissue development	-7.58382	8.34993	8.87247	30169	191	227	12	5.28634	1.48515	25|983|1909|2475|3688|5156|5159|5915|6469|6548|7046|7422	ABL1|CDK1|EDNRA|MTOR|ITGB1|PDGFRA|PDGFRB|RARB|SHH|SLC9A1|TGFBR1|VEGFA	-6.29328	-11.1994	132.903
GO:0046697	GO Biological Processes	19	decidualization	-7.57364	31.8967	13.4564	30169	25	227	6	2.64317	1.06471	142|1508|5467|5743|7421|51738	PARP1|CTSB|PPARD|PTGS2|VDR|GHRL	-6.2842	-20.2052	31.8967
GO:0098581	GO Biological Processes	19	detection of external biotic stimulus	-7.57364	31.8967	13.4564	30169	25	227	6	2.64317	1.06471	949|3105|3123|7099|10392|64127	SCARB1|HLA-A|HLA-DRB1|TLR4|NOD1|NOD2	-6.2842	-8.24926	59.068
GO:0071827	GO Biological Processes	19	plasma lipoprotein particle organization	-7.57119	22.1505	11.943	30169	42	227	7	3.0837	1.14742	185|949|4353|5320|7941|8399|8694	AGTR1|SCARB1|MPO|PLA2G2A|PLA2G7|PLA2G10|DGAT1	-6.28238	-7.57119	41.5322
GO:0019318	GO Biological Processes	19	hexose metabolic process	-7.57073	9.49308	9.2003	30169	154	227	11	4.84581	1.42523	207|1432|2539|2548|2645|4351|5290|5315|5467|7124|51738	AKT1|MAPK14|G6PD|GAA|GCK|MPI|PIK3CA|PKM|PPARD|TNF|GHRL	-6.28238	-10.1459	11.7613
GO:0051893	GO Biological Processes	19	regulation of focal adhesion assembly	-7.55327	16.6129	10.8868	30169	64	227	8	3.52423	1.22385	25|3791|4323|5747|5879|6548|6714|7422	ABL1|KDR|MMP14|PTK2|RAC1|SLC9A1|SRC|VEGFA	-6.26656	-10.8933	28.1916
GO:0071384	GO Biological Processes	19	cellular response to corticosteroid stimulus	-7.55327	16.6129	10.8868	30169	64	227	8	3.52423	1.22385	383|1545|1636|2908|3480|3717|6198|6446	ARG1|CYP1B1|ACE|NR3C1|IGF1R|JAK2|RPS6KB1|SGK1	-6.26656	-21.1405	24.7262
GO:0090109	GO Biological Processes	19	regulation of cell-substrate junction assembly	-7.55327	16.6129	10.8868	30169	64	227	8	3.52423	1.22385	25|3791|4323|5747|5879|6548|6714|7422	ABL1|KDR|MMP14|PTK2|RAC1|SLC9A1|SRC|VEGFA	-6.26656	-10.8933	28.1916
GO:0051346	GO Biological Processes	19	negative regulation of hydrolase activity	-7.5504	5.70094	7.95437	30169	373	227	16	7.04846	1.69888	25|207|330|331|1508|2168|2932|3265|3551|4318|4842|5054|5743|6714|7124|7422	ABL1|AKT1|BIRC3|XIAP|CTSB|FABP1|GSK3B|HRAS|IKBKB|MMP9|NOS1|SERPINE1|PTGS2|SRC|TNF|VEGFA	-6.26424	-9.38736	15.335
GO:2000278	GO Biological Processes	19	regulation of DNA biosynthetic process	-7.53574	10.9837	9.58128	30169	121	227	10	4.40529	1.36204	472|1545|2185|2247|3320|5159|5594|5595|6714|7124	ATM|CYP1B1|PTK2B|FGF2|HSP90AA1|PDGFRB|MAPK1|MAPK3|SRC|TNF	-6.25012	-13.7719	17.9599
GO:1990868	GO Biological Processes	19	response to chemokine	-7.51893	13.1443	10.1021	30169	91	227	9	3.96476	1.29512	1234|2185|2833|3576|3577|3579|7852|10803|57007	CCR5|PTK2B|CXCR3|CXCL8|CXCR1|CXCR2|CXCR4|CCR9|ACKR3	-6.23493	-17.3867	29.534
GO:1990869	GO Biological Processes	19	cellular response to chemokine	-7.51893	13.1443	10.1021	30169	91	227	9	3.96476	1.29512	1234|2185|2833|3576|3577|3579|7852|10803|57007	CCR5|PTK2B|CXCR3|CXCL8|CXCR1|CXCR2|CXCR4|CCR9|ACKR3	-6.23493	-17.3867	29.534
GO:2000117	GO Biological Processes	19	negative regulation of cysteine-type endopeptidase activity	-7.51893	13.1443	10.1021	30169	91	227	9	3.96476	1.29512	207|330|331|2168|4318|5743|6714|7124|7422	AKT1|BIRC3|XIAP|FABP1|MMP9|PTGS2|SRC|TNF|VEGFA	-6.23493	-9.38736	15.335
GO:0008610	GO Biological Processes	19	lipid biosynthetic process	-7.49969	4.45236	7.41838	30169	597	227	20	8.81057	1.88131	240|472|1080|1543|1544|1576|2247|2539|2950|4282|5290|5295|5319|5467|5742|5743|7494|8399|8694|29881	ALOX5|ATM|CFTR|CYP1A1|CYP1A2|CYP3A4|FGF2|G6PD|GSTP1|MIF|PIK3CA|PIK3R1|PLA2G1B|PPARD|PTGS1|PTGS2|XBP1|PLA2G10|DGAT1|NPC1L1	-6.2172	-15.2569	25.3149
GO:0006940	GO Biological Processes	19	regulation of smooth muscle contraction	-7.49903	16.3573	10.7921	30169	65	227	8	3.52423	1.22385	134|136|1131|2149|3815|5743|6869|51738	ADORA1|ADORA2B|CHRM3|F2R|KIT|PTGS2|TACR1|GHRL	-6.2172	-11.9277	25.7232
GO:0032653	GO Biological Processes	19	regulation of interleukin-10 production	-7.49903	16.3573	10.7921	30169	65	227	8	3.52423	1.22385	3123|3569|3718|6774|6850|7099|54106|64127	HLA-DRB1|IL6|JAK3|STAT3|SYK|TLR4|TLR9|NOD2	-6.2172	-11.5766	51.6845
GO:1905330	GO Biological Processes	19	regulation of morphogenesis of an epithelium	-7.49903	16.3573	10.7921	30169	65	227	8	3.52423	1.22385	25|367|2099|2246|2247|6469|7124|7422	ABL1|AR|ESR1|FGF1|FGF2|SHH|TNF|VEGFA	-6.2172	-7.49903	33.2258
GO:0009791	GO Biological Processes	19	post-embryonic development	-7.47704	13.0014	10.0382	30169	92	227	9	3.96476	1.29512	25|472|596|1544|2475|3717|3791|7046|7422	ABL1|ATM|BCL2|CYP1A2|MTOR|JAK2|KDR|TGFBR1|VEGFA	-6.19575	-10.8933	28.1916
GO:0071675	GO Biological Processes	19	regulation of mononuclear cell migration	-7.46746	10.8051	9.48764	30169	123	227	10	4.40529	1.36204	25|207|2185|5054|5594|5595|5747|7124|7941|11035	ABL1|AKT1|PTK2B|SERPINE1|MAPK1|MAPK3|PTK2|TNF|PLA2G7|RIPK3	-6.1867	-7.46746	12.6574
GO:0042178	GO Biological Processes	19	xenobiotic catabolic process	-7.46243	30.6699	13.1782	30169	26	227	6	2.64317	1.06471	1543|1544|1557|1576|4842|8856	CYP1A1|CYP1A2|CYP2C19|CYP3A4|NOS1|NR1I2	-6.18221	-12.4171	66.4515
GO:0031343	GO Biological Processes	19	positive regulation of cell killing	-7.44572	16.1095	10.6995	30169	66	227	8	3.52423	1.22385	383|3105|3123|4843|5551|5599|6777|6850	ARG1|HLA-A|HLA-DRB1|NOS2|PRF1|MAPK8|STAT5B|SYK	-6.16604	-9.47431	66.4515
GO:0014065	GO Biological Processes	19	phosphatidylinositol 3-kinase signaling	-7.42432	21.1437	11.6425	30169	44	227	7	3.0837	1.14742	207|2064|3356|3480|5290|5295|5467	AKT1|ERBB2|HTR2A|IGF1R|PIK3CA|PIK3R1|PPARD	-6.14518	-10.642	39.0891
GO:0002793	GO Biological Processes	19	positive regulation of peptide secretion	-7.39478	12.7248	9.91313	30169	94	227	9	3.96476	1.29512	134|1080|2645|3091|3123|3717|5467|9971|51738	ADORA1|CFTR|GCK|HIF1A|HLA-DRB1|JAK2|PPARD|NR1H4|GHRL	-6.11682	-26.71	29.534
GO:0030218	GO Biological Processes	19	erythrocyte differentiation	-7.39478	12.7248	9.91313	30169	94	227	9	3.96476	1.29512	836|2034|2539|3717|3718|3815|6777|7422|8399	CASP3|EPAS1|G6PD|JAK2|JAK3|KIT|STAT5B|VEGFA|PLA2G10	-6.11682	-14.1989	12.7248
GO:0030888	GO Biological Processes	19	regulation of B cell proliferation	-7.3933	15.869	10.6088	30169	67	227	8	3.52423	1.22385	196|472|596|836|3558|4282|7099|54106	AHR|ATM|BCL2|CASP3|IL2|MIF|TLR4|TLR9	-6.11682	-9.91433	44.301
GO:0042531	GO Biological Processes	19	positive regulation of tyrosine phosphorylation of STAT protein	-7.3933	15.869	10.6088	30169	67	227	8	3.52423	1.22385	3066|3558|3569|3572|3717|3815|7124|7132	HDAC2|IL2|IL6|IL6ST|JAK2|KIT|TNF|TNFRSF1A	-6.11682	-18.9652	56.9585
GO:1901224	GO Biological Processes	19	positive regulation of NIK/NF-kappaB signaling	-7.3933	15.869	10.6088	30169	67	227	8	3.52423	1.22385	1956|2033|3553|7099|7124|10392|54106|64127	EGFR|EP300|IL1B|TLR4|TNF|NOD1|TLR9|NOD2	-6.11682	-25.3768	31.6436
GO:0032943	GO Biological Processes	19	mononuclear cell proliferation	-7.36734	10.5479	9.35116	30169	126	227	10	4.40529	1.36204	25|596|598|1636|2064|3558|6469|6777|7099|10892	ABL1|BCL2|BCL2L1|ACE|ERBB2|IL2|SHH|STAT5B|TLR4|MALT1	-6.09139	-7.87424	56.9585
GO:0061043	GO Biological Processes	19	regulation of vascular wound healing	-7.35936	47.4654	15.1412	30169	14	227	5	2.20264	0.974143	240|5054|7124|7494|7852	ALOX5|SERPINE1|TNF|XBP1|CXCR4	-6.08394	-7.35936	49.8387
GO:0030878	GO Biological Processes	19	thyroid gland development	-7.35602	29.534	12.9153	30169	27	227	6	2.64317	1.06471	673|1909|5594|5595|5604|6469	BRAF|EDNRA|MAPK1|MAPK3|MAP2K1|SHH	-6.08166	-10.119	99.6773
GO:0035774	GO Biological Processes	19	positive regulation of insulin secretion involved in cellular response to glucose stimulus	-7.35602	29.534	12.9153	30169	27	227	6	2.64317	1.06471	1080|3091|3123|5467|9971|51738	CFTR|HIF1A|HLA-DRB1|PPARD|NR1H4|GHRL	-6.08166	-26.71	29.534
GO:0007229	GO Biological Processes	19	integrin-mediated signaling pathway	-7.35438	12.5908	9.85204	30169	95	227	9	3.96476	1.29512	25|2185|3685|3688|3695|5747|5781|6714|6850	ABL1|PTK2B|ITGAV|ITGB1|ITGB7|PTK2|PTPN11|SRC|SYK	-6.0809	-9.27316	44.301
GO:0010712	GO Biological Processes	19	regulation of collagen metabolic process	-7.35367	20.6738	11.4996	30169	45	227	7	3.0837	1.14742	2147|2149|3066|3569|3688|5159|5467	F2|F2R|HDAC2|IL6|ITGB1|PDGFRB|PPARD	-6.0809	-7.35367	20.6738
GO:0071825	GO Biological Processes	19	protein-lipid complex subunit organization	-7.35367	20.6738	11.4996	30169	45	227	7	3.0837	1.14742	185|949|4353|5320|7941|8399|8694	AGTR1|SCARB1|MPO|PLA2G2A|PLA2G7|PLA2G10|DGAT1	-6.0809	-7.57119	41.5322
GO:0032024	GO Biological Processes	19	positive regulation of insulin secretion	-7.34175	15.6357	10.5202	30169	68	227	8	3.52423	1.22385	1080|2645|3091|3123|3717|5467|9971|51738	CFTR|GCK|HIF1A|HLA-DRB1|JAK2|PPARD|NR1H4|GHRL	-6.0695	-26.71	29.534
GO:0051282	GO Biological Processes	19	regulation of sequestering of calcium ion	-7.33456	10.4648	9.30669	30169	127	227	10	4.40529	1.36204	25|623|1234|2147|2149|2185|2247|3356|4842|5170	ABL1|BDKRB1|CCR5|F2|F2R|PTK2B|FGF2|HTR2A|NOS1|PDPK1	-6.06285	-19.6206	16.2077
GO:0001701	GO Biological Processes	19	in utero embryonic development	-7.32942	5.4947	7.74863	30169	387	227	16	7.04846	1.69888	207|367|598|841|891|1909|1956|2034|3091|3688|5156|5594|5604|7046|7048|7422	AKT1|AR|BCL2L1|CASP8|CCNB1|EDNRA|EGFR|EPAS1|HIF1A|ITGB1|PDGFRA|MAPK1|MAP2K1|TGFBR1|TGFBR2|VEGFA	-6.05823	-20.3322	15.4197
GO:0072330	GO Biological Processes	19	monocarboxylic acid biosynthetic process	-7.3161	8.96892	8.8825	30169	163	227	11	4.84581	1.42523	240|1543|1544|1576|2950|4282|5319|5742|5743|7494|8399	ALOX5|CYP1A1|CYP1A2|CYP3A4|GSTP1|MIF|PLA2G1B|PTGS1|PTGS2|XBP1|PLA2G10	-6.04544	-15.2569	25.3149
GO:0022408	GO Biological Processes	19	negative regulation of cell-cell adhesion	-7.31497	7.89523	8.56148	30169	202	227	12	5.28634	1.48515	25|207|383|836|2064|3123|3558|3717|3718|5747|6469|7422	ABL1|AKT1|ARG1|CASP3|ERBB2|HLA-DRB1|IL2|JAK2|JAK3|PTK2|SHH|VEGFA	-6.04484	-11.5568	33.2258
GO:0046330	GO Biological Processes	19	positive regulation of JNK cascade	-7.31445	12.4597	9.79185	30169	96	227	9	3.96476	1.29512	331|2185|3265|3553|7099|7124|10392|54106|64127	XIAP|PTK2B|HRAS|IL1B|TLR4|TNF|NOD1|TLR9|NOD2	-6.04484	-25.3768	31.6436
GO:0090287	GO Biological Processes	19	regulation of cellular response to growth factor stimulus	-7.30452	5.89807	7.88488	30169	338	227	15	6.60793	1.64883	25|331|2033|2246|2247|2260|3065|3066|3091|3553|3791|5170|5468|7498|23411	ABL1|XIAP|EP300|FGF1|FGF2|FGFR1|HDAC1|HDAC2|HIF1A|IL1B|KDR|PDPK1|PPARG|XDH|SIRT1	-6.0358	-27.9533	17.7204
GO:0002443	GO Biological Processes	19	leukocyte mediated immunity	-7.30385	6.41601	8.0694	30169	290	227	14	6.1674	1.59667	136|1636|1991|2147|3105|3123|3383|3569|3815|5319|5551|6777|6778|6850	ADORA2B|ACE|ELANE|F2|HLA-A|HLA-DRB1|ICAM1|IL6|KIT|PLA2G1B|PRF1|STAT5B|STAT6|SYK	-6.0358	-13.99	28.892
GO:0090092	GO Biological Processes	19	regulation of transmembrane receptor protein serine/threonine kinase signaling pathway	-7.30385	6.41601	8.0694	30169	290	227	14	6.1674	1.59667	25|142|331|2033|3065|3066|3717|3791|5170|5468|6469|7046|7048|23411	ABL1|PARP1|XIAP|EP300|HDAC1|HDAC2|JAK2|KDR|PDPK1|PPARG|SHH|TGFBR1|TGFBR2|SIRT1	-6.0358	-27.9533	17.7204
GO:0022898	GO Biological Processes	19	regulation of transmembrane transporter activity	-7.28531	6.39396	8.05053	30169	291	227	14	6.1674	1.59667	596|1080|1131|1394|1612|1909|2185|3688|4318|4842|4988|5243|6548|54106	BCL2|CFTR|CHRM3|CRHR1|DAPK1|EDNRA|PTK2B|ITGB1|MMP9|NOS1|OPRM1|ABCB1|SLC9A1|TLR9	-6.01778	-8.37192	18.1231
GO:0022617	GO Biological Processes	19	extracellular matrix disassembly	-7.28475	20.2244	11.3613	30169	46	227	7	3.0837	1.14742	1991|4313|4314|4316|4318|4323|5644	ELANE|MMP2|MMP3|MMP7|MMP9|MMP14|PRSS1	-6.01774	-7.66463	20.2244
GO:0071868	GO Biological Processes	19	cellular response to monoamine stimulus	-7.27499	12.3312	9.73256	30169	97	227	9	3.96476	1.29512	25|1131|2932|3066|3274|3356|5594|5595|6548	ABL1|CHRM3|GSK3B|HDAC2|HRH2|HTR2A|MAPK1|MAPK3|SLC9A1	-6.00903	-7.27499	12.8099
GO:0071870	GO Biological Processes	19	cellular response to catecholamine stimulus	-7.27499	12.3312	9.73256	30169	97	227	9	3.96476	1.29512	25|1131|2932|3066|3274|3356|5594|5595|6548	ABL1|CHRM3|GSK3B|HDAC2|HRH2|HTR2A|MAPK1|MAPK3|SLC9A1	-6.00903	-7.27499	12.8099
GO:0001816	GO Biological Processes	19	cytokine production	-7.25401	28.4792	12.6663	30169	28	227	6	2.64317	1.06471	834|3091|3553|3569|3685|7124	CASP1|HIF1A|IL1B|IL6|ITGAV|TNF	-5.98961	-11.6147	75.9446
GO:0002675	GO Biological Processes	19	positive regulation of acute inflammatory response	-7.25401	28.4792	12.6663	30169	28	227	6	2.64317	1.06471	3553|3569|3572|5733|5743|7124	IL1B|IL6|IL6ST|PTGER3|PTGS2|TNF	-5.98961	-11.6147	75.9446
GO:1900017	GO Biological Processes	19	positive regulation of cytokine production involved in inflammatory response	-7.25401	28.4792	12.6663	30169	28	227	6	2.64317	1.06471	3091|3569|6774|7099|7124|64127	HIF1A|IL6|STAT3|TLR4|TNF|NOD2	-5.98961	-25.3768	31.6436
GO:0014823	GO Biological Processes	19	response to activity	-7.24113	15.1889	10.3483	30169	70	227	8	3.52423	1.22385	983|3091|3569|4313|5290|5467|7124|7852	CDK1|HIF1A|IL6|MMP2|PIK3CA|PPARD|TNF|CXCR4	-5.97724	-7.24113	15.1889
GO:0002262	GO Biological Processes	19	myeloid cell homeostasis	-7.23795	10.2233	9.17618	30169	130	227	10	4.40529	1.36204	836|2034|2539|3569|3717|3718|3815|6777|7422|8399	CASP3|EPAS1|G6PD|IL6|JAK2|JAK3|KIT|STAT5B|VEGFA|PLA2G10	-5.97561	-14.1989	12.7248
GO:0002285	GO Biological Processes	19	lymphocyte activation involved in immune response	-7.23795	10.2233	9.17618	30169	130	227	10	4.40529	1.36204	25|2185|2475|3383|3569|5734|6097|6774|6778|7099	ABL1|PTK2B|MTOR|ICAM1|IL6|PTGER4|RORC|STAT3|STAT6|TLR4	-5.97561	-11.4424	51.6845
GO:0045621	GO Biological Processes	19	positive regulation of lymphocyte differentiation	-7.23795	10.2233	9.17618	30169	130	227	10	4.40529	1.36204	3123|3558|4323|6469|6777|6850|7048|7494|10892|114548	HLA-DRB1|IL2|MMP14|SHH|STAT5B|SYK|TGFBR2|XBP1|MALT1|NLRP3	-5.97561	-28.2991	25.5583
GO:0034308	GO Biological Processes	19	primary alcohol metabolic process	-7.23598	12.2054	9.67412	30169	98	227	9	3.96476	1.29512	217|1543|1544|1545|1576|1910|8694|10327|57016	ALDH2|CYP1A1|CYP1A2|CYP1B1|CYP3A4|EDNRB|DGAT1|AKR1A1|AKR1B10	-5.97415	-12.4171	66.4515
GO:0050851	GO Biological Processes	19	antigen receptor-mediated signaling pathway	-7.22136	7.74193	8.45417	30169	206	227	12	5.28634	1.48515	25|596|673|3105|3123|3265|3551|5290|5594|6850|8517|10892	ABL1|BCL2|BRAF|HLA-A|HLA-DRB1|HRAS|IKBKB|PIK3CA|MAPK1|SYK|IKBKG|MALT1	-5.96056	-18.9163	12.3058
GO:2000241	GO Biological Processes	19	regulation of reproductive process	-7.22136	7.74193	8.45417	30169	206	227	12	5.28634	1.48515	367|598|1910|2099|3066|3815|6469|6714|6790|6869|7422|8399	AR|BCL2L1|EDNRB|ESR1|HDAC2|KIT|SHH|SRC|AURKA|TACR1|VEGFA|PLA2G10	-5.96056	-7.69176	22.1505
GO:1902895	GO Biological Processes	19	positive regulation of miRNA transcription	-7.21748	19.7941	11.2273	30169	47	227	7	3.0837	1.14742	2247|2908|3091|5468|6774|7015|7124	FGF2|NR3C1|HIF1A|PPARG|STAT3|TERT|TNF	-5.9572	-9.64791	41.5322
GO:0043271	GO Biological Processes	19	negative regulation of ion transport	-7.20803	8.7541	8.74903	30169	167	227	11	4.84581	1.42523	134|596|1394|1636|2185|3356|4318|4842|5743|7124|54106	ADORA1|BCL2|CRHR1|ACE|PTK2B|HTR2A|MMP9|NOS1|PTGS2|TNF|TLR9	-5.94825	-13.4197	10.7759
GO:0010389	GO Biological Processes	19	regulation of G2/M transition of mitotic cell cycle	-7.19741	12.0821	9.61654	30169	99	227	9	3.96476	1.29512	472|595|891|983|1017|1019|5347|6790|23476	ATM|CCND1|CCNB1|CDK1|CDK2|CDK4|PLK1|AURKA|BRD4	-5.93866	-15.1858	23.7327
GO:0097306	GO Biological Processes	19	cellular response to alcohol	-7.19741	12.0821	9.61654	30169	99	227	9	3.96476	1.29512	196|207|1019|1080|1545|1636|3480|5734|6446	AHR|AKT1|CDK4|CFTR|CYP1B1|ACE|IGF1R|PTGER4|SGK1	-5.93866	-21.1405	24.7262
GO:0006206	GO Biological Processes	19	pyrimidine nucleobase metabolic process	-7.18594	44.301	14.6055	30169	15	227	5	2.20264	0.974143	1806|1890|2475|5594|7298	DPYD|TYMP|MTOR|MAPK1|TYMS	-5.92872	-7.18594	44.301
GO:0045579	GO Biological Processes	19	positive regulation of B cell differentiation	-7.18594	44.301	14.6055	30169	15	227	5	2.20264	0.974143	3558|4323|6777|6850|7494	IL2|MMP14|STAT5B|SYK|XBP1	-5.92872	-10.3009	44.301
GO:2001028	GO Biological Processes	19	positive regulation of endothelial cell chemotaxis	-7.18594	44.301	14.6055	30169	15	227	5	2.20264	0.974143	2247|2260|3791|4233|7422	FGF2|FGFR1|KDR|MET|VEGFA	-5.92872	-18.7692	49.8387
GO:0061564	GO Biological Processes	19	axon development	-7.17741	5.3563	7.60772	30169	397	227	16	7.04846	1.69888	596|836|1909|2064|3320|3480|3688|3717|4313|5747|5781|5879|5979|6469|7422|8399	BCL2|CASP3|EDNRA|ERBB2|HSP90AA1|IGF1R|ITGB1|JAK2|MMP2|PTK2|PTPN11|RAC1|RET|SHH|VEGFA|PLA2G10	-5.9207	-12.238	7.3835
GO:0015718	GO Biological Processes	19	monocarboxylic acid transport	-7.15927	11.9613	9.55977	30169	100	227	9	3.96476	1.29512	624|1636|4843|5319|5320|5743|6555|8399|9429	BDKRB2|ACE|NOS2|PLA2G1B|PLA2G2A|PTGS2|SLC10A2|PLA2G10|ABCG2	-5.90409	-15.1054	31.0107
GO:0071867	GO Biological Processes	19	response to monoamine	-7.15927	11.9613	9.55977	30169	100	227	9	3.96476	1.29512	25|1131|2932|3066|3274|3356|5594|5595|6548	ABL1|CHRM3|GSK3B|HDAC2|HRH2|HTR2A|MAPK1|MAPK3|SLC9A1	-5.90409	-7.27499	12.8099
GO:0071869	GO Biological Processes	19	response to catecholamine	-7.15927	11.9613	9.55977	30169	100	227	9	3.96476	1.29512	25|1131|2932|3066|3274|3356|5594|5595|6548	ABL1|CHRM3|GSK3B|HDAC2|HRH2|HTR2A|MAPK1|MAPK3|SLC9A1	-5.90409	-7.27499	12.8099
GO:0034368	GO Biological Processes	19	protein-lipid complex remodeling	-7.15607	27.4972	12.4301	30169	29	227	6	2.64317	1.06471	185|949|4353|5320|7941|8399	AGTR1|SCARB1|MPO|PLA2G2A|PLA2G7|PLA2G10	-5.9024	-7.57119	41.5322
GO:0034369	GO Biological Processes	19	plasma lipoprotein particle remodeling	-7.15607	27.4972	12.4301	30169	29	227	6	2.64317	1.06471	185|949|4353|5320|7941|8399	AGTR1|SCARB1|MPO|PLA2G2A|PLA2G7|PLA2G10	-5.9024	-7.57119	41.5322
GO:0070633	GO Biological Processes	19	transepithelial transport	-7.15607	27.4972	12.4301	30169	29	227	6	2.64317	1.06471	1080|1910|4363|5243|6523|9429	CFTR|EDNRB|ABCC1|ABCB1|SLC5A1|ABCG2	-5.9024	-7.15607	39.8709
GO:0043367	GO Biological Processes	19	CD4-positive, alpha-beta T cell differentiation	-7.1518	19.3817	11.0973	30169	48	227	7	3.0837	1.14742	673|2475|3569|5734|6097|6774|6778	BRAF|MTOR|IL6|PTGER4|RORC|STAT3|STAT6	-5.89863	-11.4424	51.6845
GO:0007589	GO Biological Processes	19	body fluid secretion	-7.14366	14.767	10.1833	30169	72	227	8	3.52423	1.22385	134|595|1131|3091|6777|7421|7422|7498	ADORA1|CCND1|CHRM3|HIF1A|STAT5B|VDR|VEGFA|XDH	-5.89201	-10.5172	19.4492
GO:0046626	GO Biological Processes	19	regulation of insulin receptor signaling pathway	-7.14366	14.767	10.1833	30169	72	227	8	3.52423	1.22385	1019|3553|5295|5781|6198|6714|9971|23411	CDK4|IL1B|PIK3R1|PTPN11|RPS6KB1|SRC|NR1H4|SIRT1	-5.89201	-7.14366	66.4515
GO:0046635	GO Biological Processes	19	positive regulation of alpha-beta T cell activation	-7.14366	14.767	10.1833	30169	72	227	8	3.52423	1.22385	3105|3123|3717|6469|6850|7048|10892|114548	HLA-A|HLA-DRB1|JAK2|SHH|SYK|TGFBR2|MALT1|NLRP3	-5.89201	-28.2991	25.5583
GO:0008016	GO Biological Processes	19	regulation of heart contraction	-7.12983	7.59446	8.34971	30169	210	227	12	5.28634	1.48515	134|1909|1910|2034|2548|3320|3558|3717|4193|4842|6548|7124	ADORA1|EDNRA|EDNRB|EPAS1|GAA|HSP90AA1|IL2|JAK2|MDM2|NOS1|SLC9A1|TNF	-5.87867	-7.12983	20.4466
GO:0002244	GO Biological Processes	19	hematopoietic progenitor cell differentiation	-7.12156	11.8428	9.50381	30169	101	227	9	3.96476	1.29512	596|673|1636|2321|3791|3815|5156|6469|7153	BCL2|BRAF|ACE|FLT1|KDR|KIT|PDGFRA|SHH|TOP2A	-5.87141	-7.12156	33.2258
GO:1905477	GO Biological Processes	19	positive regulation of protein localization to membrane	-7.12156	11.8428	9.50381	30169	101	227	9	3.96476	1.29512	207|1956|2064|3265|3688|5170|5295|5599|7124	AKT1|EGFR|ERBB2|HRAS|ITGB1|PDPK1|PIK3R1|MAPK8|TNF	-5.87141	-8.5226	13.5156
GO:0046637	GO Biological Processes	19	regulation of alpha-beta T cell differentiation	-7.09605	14.5647	10.1033	30169	73	227	8	3.52423	1.22385	3123|3558|3718|6469|6850|7048|10892|114548	HLA-DRB1|IL2|JAK3|SHH|SYK|TGFBR2|MALT1|NLRP3	-5.8464	-28.2991	25.5583
GO:0033628	GO Biological Processes	19	regulation of cell adhesion mediated by integrin	-7.08762	18.9862	10.9712	30169	49	227	7	3.0837	1.14742	1545|1803|5054|5747|5781|5979|6850	CYP1B1|DPP4|SERPINE1|PTK2|PTPN11|RET|SYK	-5.83947	-7.08762	33.2258
GO:0042311	GO Biological Processes	19	vasodilation	-7.08762	18.9862	10.9712	30169	49	227	7	3.0837	1.14742	134|136|624|1910|4842|5467|7124	ADORA1|ADORA2B|BDKRB2|EDNRB|NOS1|PPARD|TNF	-5.83947	-7.12983	20.4466
GO:0045933	GO Biological Processes	19	positive regulation of muscle contraction	-7.08762	18.9862	10.9712	30169	49	227	7	3.0837	1.14742	1131|2149|3320|3815|5743|6869|51738	CHRM3|F2R|HSP90AA1|KIT|PTGS2|TACR1|GHRL	-5.83947	-11.9277	25.7232
GO:0000077	GO Biological Processes	19	DNA damage checkpoint signaling	-7.08427	11.7267	9.44863	30169	102	227	9	3.96476	1.29512	472|595|983|1017|1432|4193|5347|5781|11200	ATM|CCND1|CDK1|CDK2|MAPK14|MDM2|PLK1|PTPN11|CHEK2	-5.83761	-10.5861	22.9143
GO:0009408	GO Biological Processes	19	response to heat	-7.08427	11.7267	9.44863	30169	102	227	9	3.96476	1.29512	207|2246|2475|3066|3320|4842|5743|6198|6869	AKT1|FGF1|MTOR|HDAC2|HSP90AA1|NOS1|PTGS2|RPS6KB1|TACR1	-5.83761	-10.1714	44.301
GO:0070997	GO Biological Processes	19	neuron death	-7.08427	11.7267	9.44863	30169	102	227	9	3.96476	1.29512	25|331|472|596|598|836|3091|3265|6548	ABL1|XIAP|ATM|BCL2|BCL2L1|CASP3|HIF1A|HRAS|SLC9A1	-5.83761	-8.93912	20.9847
GO:0030225	GO Biological Processes	19	macrophage differentiation	-7.06189	26.5806	12.2054	30169	30	227	6	2.64317	1.06471	142|841|3123|4318|7422|23411	PARP1|CASP8|HLA-DRB1|MMP9|VEGFA|SIRT1	-5.81623	-16.1654	26.5806
GO:0060603	GO Biological Processes	19	mammary gland duct morphogenesis	-7.06189	26.5806	12.2054	30169	30	227	6	2.64317	1.06471	367|2099|2908|5241|6714|7421	AR|ESR1|NR3C1|PGR|SRC|VDR	-5.81623	-20.0724	75.9446
GO:0140352	GO Biological Processes	19	export from cell	-7.05112	4.91164	7.36104	30169	460	227	17	7.48899	1.74701	136|479|673|1080|1394|1910|3091|3569|3815|4363|4843|5243|5743|6548|6850|9429|51738	ADORA2B|ATP12A|BRAF|CFTR|CRHR1|EDNRB|HIF1A|IL6|KIT|ABCC1|NOS2|ABCB1|PTGS2|SLC9A1|SYK|ABCG2|GHRL	-5.80595	-14.4151	36.2463
GO:0071479	GO Biological Processes	19	cellular response to ionizing radiation	-7.04917	14.3679	10.0248	30169	74	227	8	3.52423	1.22385	472|598|894|1432|3265|4193|11200|23411	ATM|BCL2L1|CCND2|MAPK14|HRAS|MDM2|CHEK2|SIRT1	-5.80449	-10.5861	22.9143
GO:0034101	GO Biological Processes	19	erythrocyte homeostasis	-7.04739	11.6129	9.39421	30169	103	227	9	3.96476	1.29512	836|2034|2539|3717|3718|3815|6777|7422|8399	CASP3|EPAS1|G6PD|JAK2|JAK3|KIT|STAT5B|VEGFA|PLA2G10	-5.8037	-14.1989	12.7248
GO:1903076	GO Biological Processes	19	regulation of protein localization to plasma membrane	-7.04739	11.6129	9.39421	30169	103	227	9	3.96476	1.29512	207|367|598|1956|3688|4323|5170|5295|7124	AKT1|AR|BCL2L1|EGFR|ITGB1|MMP14|PDPK1|PIK3R1|TNF	-5.8037	-8.5226	13.5156
GO:0032970	GO Biological Processes	19	regulation of actin filament-based process	-7.04452	5.23756	7.48491	30169	406	227	16	7.04846	1.69888	25|134|673|2185|2475|3265|4233|5156|5159|5290|5295|5734|5879|6548|6869|7046	ABL1|ADORA1|BRAF|PTK2B|MTOR|HRAS|MET|PDGFRA|PDGFRB|PIK3CA|PIK3R1|PTGER4|RAC1|SLC9A1|TACR1|TGFBR1	-5.80133	-13.9473	22.9143
GO:0045637	GO Biological Processes	19	regulation of myeloid cell differentiation	-7.04029	7.45251	8.24796	30169	214	227	12	5.28634	1.48515	841|1432|2185|2475|3091|3123|5295|6772|6774|6777|7099|7124	CASP8|MAPK14|PTK2B|MTOR|HIF1A|HLA-DRB1|PIK3R1|STAT1|STAT3|STAT5B|TLR4|TNF	-5.79759	-7.04029	19.5446
GO:0002730	GO Biological Processes	19	regulation of dendritic cell cytokine production	-7.02588	41.5322	14.1202	30169	16	227	5	2.20264	0.974143	3718|3815|7099|54106|64127	JAK3|KIT|TLR4|TLR9|NOD2	-5.78562	-11.5766	51.6845
GO:0034374	GO Biological Processes	19	low-density lipoprotein particle remodeling	-7.02588	41.5322	14.1202	30169	16	227	5	2.20264	0.974143	185|4353|5320|7941|8399	AGTR1|MPO|PLA2G2A|PLA2G7|PLA2G10	-5.78562	-7.57119	41.5322
GO:0090399	GO Biological Processes	19	replicative senescence	-7.02588	41.5322	14.1202	30169	16	227	5	2.20264	0.974143	472|4311|5054|7015|11200	ATM|MME|SERPINE1|TERT|CHEK2	-5.78562	-7.02588	66.4515
GO:1903799	GO Biological Processes	19	negative regulation of miRNA maturation	-7.02588	41.5322	14.1202	30169	16	227	5	2.20264	0.974143	2099|3569|6774|7015|7124	ESR1|IL6|STAT3|TERT|TNF	-5.78562	-9.64791	41.5322
GO:0006937	GO Biological Processes	19	regulation of muscle contraction	-7.02583	8.40192	8.5259	30169	174	227	11	4.84581	1.42523	134|136|1131|2149|3320|3815|4842|5743|6548|6869|51738	ADORA1|ADORA2B|CHRM3|F2R|HSP90AA1|KIT|NOS1|PTGS2|SLC9A1|TACR1|GHRL	-5.78562	-11.9277	25.7232
GO:0019748	GO Biological Processes	19	secondary metabolic process	-7.02489	18.6064	10.8488	30169	50	227	7	3.0837	1.14742	596|1543|1544|1545|1576|10327|57016	BCL2|CYP1A1|CYP1A2|CYP1B1|CYP3A4|AKR1A1|AKR1B10	-5.78562	-12.4171	66.4515
GO:0038093	GO Biological Processes	19	Fc receptor signaling pathway	-7.02489	18.6064	10.8488	30169	50	227	7	3.0837	1.14742	25|3551|3815|5599|5747|6714|6850	ABL1|IKBKB|KIT|MAPK8|PTK2|SRC|SYK	-5.78562	-9.27316	44.301
GO:0071346	GO Biological Processes	19	cellular response to interferon-gamma	-7.0109	11.5012	9.34054	30169	104	227	9	3.96476	1.29512	834|1612|3716|3717|4843|6198|6772|7099|7124	CASP1|DAPK1|JAK1|JAK2|NOS2|RPS6KB1|STAT1|TLR4|TNF	-5.77212	-13.5751	79.7419
GO:0051048	GO Biological Processes	19	negative regulation of secretion	-7.00049	8.35391	8.49505	30169	175	227	11	4.84581	1.42523	134|673|1636|2149|3553|4988|5733|5781|7124|7132|51738	ADORA1|BRAF|ACE|F2R|IL1B|OPRM1|PTGER3|PTPN11|TNF|TNFRSF1A|GHRL	-5.76219	-7.00049	39.8709
GO:0050680	GO Biological Processes	19	negative regulation of epithelial cell proliferation	-6.97531	8.30644	8.46444	30169	176	227	11	4.84581	1.42523	240|367|2321|5467|5468|6772|7046|7124|7421|7498|51738	ALOX5|AR|FLT1|PPARD|PPARG|STAT1|TGFBR1|TNF|VDR|XDH|GHRL	-5.7375	-20.9599	13.9898
GO:0034367	GO Biological Processes	19	protein-containing complex remodeling	-6.9712	25.7232	11.9915	30169	31	227	6	2.64317	1.06471	185|949|4353|5320|7941|8399	AGTR1|SCARB1|MPO|PLA2G2A|PLA2G7|PLA2G10	-5.73484	-7.57119	41.5322
GO:0045987	GO Biological Processes	19	positive regulation of smooth muscle contraction	-6.9712	25.7232	11.9915	30169	31	227	6	2.64317	1.06471	1131|2149|3815|5743|6869|51738	CHRM3|F2R|KIT|PTGS2|TACR1|GHRL	-5.73484	-11.9277	25.7232
GO:0010573	GO Biological Processes	19	vascular endothelial growth factor production	-6.96925	75.9446	17.2665	30169	7	227	4	1.76211	0.87326	3091|3553|3569|7124	HIF1A|IL1B|IL6|TNF	-5.73484	-11.6147	75.9446
GO:0031622	GO Biological Processes	19	positive regulation of fever generation	-6.96925	75.9446	17.2665	30169	7	227	4	1.76211	0.87326	3553|5733|5743|7124	IL1B|PTGER3|PTGS2|TNF	-5.73484	-11.6147	75.9446
GO:0060440	GO Biological Processes	19	trachea formation	-6.96925	75.9446	17.2665	30169	7	227	4	1.76211	0.87326	5594|5595|5604|7048	MAPK1|MAPK3|MAP2K1|TGFBR2	-5.73484	-10.119	99.6773
GO:0060558	GO Biological Processes	19	regulation of calcidiol 1-monooxygenase activity	-6.96925	75.9446	17.2665	30169	7	227	4	1.76211	0.87326	3553|4790|7124|7421	IL1B|NFKB1|TNF|VDR	-5.73484	-6.96925	75.9446
GO:0060745	GO Biological Processes	19	mammary gland branching involved in pregnancy	-6.96925	75.9446	17.2665	30169	7	227	4	1.76211	0.87326	367|2099|5241|7421	AR|ESR1|PGR|VDR	-5.73484	-20.0724	75.9446
GO:0043491	GO Biological Processes	19	protein kinase B signaling	-6.96355	18.2416	10.7299	30169	51	227	7	3.0837	1.14742	207|2247|3553|3791|5290|6198|7124	AKT1|FGF2|IL1B|KDR|PIK3CA|RPS6KB1|TNF	-5.7301	-15.7672	42.2873
GO:1905562	GO Biological Processes	19	regulation of vascular endothelial cell proliferation	-6.96355	18.2416	10.7299	30169	51	227	7	3.0837	1.14742	2247|2260|2321|5170|5468|6774|51738	FGF2|FGFR1|FLT1|PDPK1|PPARG|STAT3|GHRL	-5.7301	-8.88999	39.8709
GO:0001937	GO Biological Processes	19	negative regulation of endothelial cell proliferation	-6.95748	13.9898	9.87239	30169	76	227	8	3.52423	1.22385	240|2321|5468|6772|7046|7124|7498|51738	ALOX5|FLT1|PPARG|STAT1|TGFBR1|TNF|XDH|GHRL	-5.725	-20.9599	13.9898
GO:0043401	GO Biological Processes	19	steroid hormone mediated signaling pathway	-6.95748	13.9898	9.87239	30169	76	227	8	3.52423	1.22385	367|2099|2100|2908|3717|5241|5467|6714	AR|ESR1|ESR2|NR3C1|JAK2|PGR|PPARD|SRC	-5.725	-20.0724	75.9446
GO:0035265	GO Biological Processes	19	organ growth	-6.9391	11.2842	9.23537	30169	106	227	9	3.96476	1.29512	25|367|596|2099|5159|5781|5915|6469|7048	ABL1|AR|BCL2|ESR1|PDGFRB|PTPN11|RARB|SHH|TGFBR2	-5.7071	-17.1966	14.5514
GO:0006919	GO Biological Processes	19	activation of cysteine-type endopeptidase activity involved in apoptotic process	-6.91264	13.8081	9.7983	30169	77	227	8	3.52423	1.22385	841|2149|2152|3717|5468|7124|7498|10392	CASP8|F2R|F3|JAK2|PPARG|TNF|XDH|NOD1	-5.68112	-26.7434	15.9484
GO:0010906	GO Biological Processes	19	regulation of glucose metabolic process	-6.90376	11.1788	9.18383	30169	107	227	9	3.96476	1.29512	207|2033|2645|2908|3486|3487|6097|6714|23411	AKT1|EP300|GCK|NR3C1|IGFBP3|IGFBP4|RORC|SRC|SIRT1	-5.67296	-11.9947	30.2052
GO:0010543	GO Biological Processes	19	regulation of platelet activation	-6.90353	17.8908	10.6143	30169	52	227	7	3.0837	1.14742	2147|3569|3572|3717|5156|6850|7099	F2|IL6|IL6ST|JAK2|PDGFRA|SYK|TLR4	-5.67296	-18.9652	56.9585
GO:1903047	GO Biological Processes	19	mitotic cell cycle process	-6.89932	4.52222	7.11625	30169	529	227	18	7.92952	1.79337	472|595|596|890|891|894|983|1017|1019|2146|3688|4193|5243|5347|6198|6790|11200|23476	ATM|CCND1|BCL2|CCNA2|CCNB1|CCND2|CDK1|CDK2|CDK4|EZH2|ITGB1|MDM2|ABCB1|PLK1|RPS6KB1|AURKA|CHEK2|BRD4	-5.66924	-15.1858	23.7327
GO:0010743	GO Biological Processes	19	regulation of macrophage derived foam cell differentiation	-6.88375	24.9193	11.7874	30169	32	227	6	2.64317	1.06471	185|3685|4790|5320|5468|8399	AGTR1|ITGAV|NFKB1|PLA2G2A|PPARG|PLA2G10	-5.6551	-7.57119	41.5322
GO:0050892	GO Biological Processes	19	intestinal absorption	-6.88375	24.9193	11.7874	30169	32	227	6	2.64317	1.06471	949|2168|2169|6523|7421|29881	SCARB1|FABP1|FABP2|SLC5A1|VDR|NPC1L1	-5.6551	-13.9122	28.4792
GO:1901889	GO Biological Processes	19	negative regulation of cell junction assembly	-6.88375	24.9193	11.7874	30169	32	227	6	2.64317	1.06471	1636|3551|3553|4323|6714|7124	ACE|IKBKB|IL1B|MMP14|SRC|TNF	-5.6551	-11.6147	75.9446
GO:0002363	GO Biological Processes	19	alpha-beta T cell lineage commitment	-6.87728	39.0891	13.6777	30169	17	227	5	2.20264	0.974143	596|2475|3569|6774|6778	BCL2|MTOR|IL6|STAT3|STAT6	-5.65195	-11.4424	51.6845
GO:0048009	GO Biological Processes	19	insulin-like growth factor receptor signaling pathway	-6.87728	39.0891	13.6777	30169	17	227	5	2.20264	0.974143	207|367|3480|3488|5295	AKT1|AR|IGF1R|IGFBP5|PIK3R1	-5.65195	-10.642	39.0891
GO:0055089	GO Biological Processes	19	fatty acid homeostasis	-6.87728	39.0891	13.6777	30169	17	227	5	2.20264	0.974143	134|7494|8694|9971|23411	ADORA1|XBP1|DGAT1|NR1H4|SIRT1	-5.65195	-7.14366	66.4515
GO:0110096	GO Biological Processes	19	cellular response to aldehyde	-6.87728	39.0891	13.6777	30169	17	227	5	2.20264	0.974143	1636|3480|6446|10327|57016	ACE|IGF1R|SGK1|AKR1A1|AKR1B10	-5.65195	-6.87728	49.8387
GO:1900034	GO Biological Processes	19	regulation of cellular response to heat	-6.87728	39.0891	13.6777	30169	17	227	5	2.20264	0.974143	472|2033|2475|2932|23411	ATM|EP300|MTOR|GSK3B|SIRT1	-5.65195	-6.87728	39.0891
GO:1901550	GO Biological Processes	19	regulation of endothelial cell development	-6.87728	39.0891	13.6777	30169	17	227	5	2.20264	0.974143	3551|3553|7124|7132|7422	IKBKB|IL1B|TNF|TNFRSF1A|VEGFA	-5.65195	-11.6147	75.9446
GO:1903140	GO Biological Processes	19	regulation of establishment of endothelial barrier	-6.87728	39.0891	13.6777	30169	17	227	5	2.20264	0.974143	3551|3553|7124|7132|7422	IKBKB|IL1B|TNF|TNFRSF1A|VEGFA	-5.65195	-11.6147	75.9446
GO:0014074	GO Biological Processes	19	response to purine-containing compound	-6.87525	9.35937	8.69376	30169	142	227	10	4.40529	1.36204	134|196|1080|1545|2185|3066|3488|3553|5743|6772	ADORA1|AHR|CFTR|CYP1B1|PTK2B|HDAC2|IGFBP5|IL1B|PTGS2|STAT1	-5.6504	-6.87525	9.35937
GO:0032956	GO Biological Processes	19	regulation of actin cytoskeleton organization	-6.87119	5.46177	7.46728	30169	365	227	15	6.60793	1.64883	25|673|2185|2475|3265|4233|5156|5159|5290|5295|5734|5879|6548|6869|7046	ABL1|BRAF|PTK2B|MTOR|HRAS|MET|PDGFRA|PDGFRB|PIK3CA|PIK3R1|PTGER4|RAC1|SLC9A1|TACR1|TGFBR1	-5.64681	-13.9473	22.9143
GO:0045913	GO Biological Processes	19	positive regulation of carbohydrate metabolic process	-6.86845	13.6311	9.72558	30169	78	227	8	3.52423	1.22385	207|2475|2645|3091|3356|4790|6714|23411	AKT1|MTOR|GCK|HIF1A|HTR2A|NFKB1|SRC|SIRT1	-5.64454	-11.9947	30.2052
GO:0006941	GO Biological Processes	19	striated muscle contraction	-6.83419	10.9736	9.08278	30169	109	227	9	3.96476	1.29512	2475|2548|3320|4842|5290|6198|6548|7124|7852	MTOR|GAA|HSP90AA1|NOS1|PIK3CA|RPS6KB1|SLC9A1|TNF|CXCR4	-5.61075	-6.83419	17.7204
GO:0010508	GO Biological Processes	19	positive regulation of autophagy	-6.81819	9.22938	8.61892	30169	144	227	10	4.40529	1.36204	1612|2932|3091|3791|5595|8517|10392|23411|54106|64127	DAPK1|GSK3B|HIF1A|KDR|MAPK3|IKBKG|NOD1|SIRT1|TLR9|NOD2	-5.59522	-18.0996	12.4043
GO:0031570	GO Biological Processes	19	DNA integrity checkpoint signaling	-6.79994	10.8739	9.03323	30169	110	227	9	3.96476	1.29512	472|595|983|1017|1432|4193|5347|5781|11200	ATM|CCND1|CDK1|CDK2|MAPK14|MDM2|PLK1|PTPN11|CHEK2	-5.57871	-10.5861	22.9143
GO:1902749	GO Biological Processes	19	regulation of cell cycle G2/M phase transition	-6.79994	10.8739	9.03323	30169	110	227	9	3.96476	1.29512	472|595|891|983|1017|1019|5347|6790|23476	ATM|CCND1|CCNB1|CDK1|CDK2|CDK4|PLK1|AURKA|BRD4	-5.57871	-15.1858	23.7327
GO:0045577	GO Biological Processes	19	regulation of B cell differentiation	-6.79933	24.1642	11.5925	30169	33	227	6	2.64317	1.06471	3558|4323|6777|6850|7494|54106	IL2|MMP14|STAT5B|SYK|XBP1|TLR9	-5.57871	-10.3009	44.301
GO:0070670	GO Biological Processes	19	response to interleukin-4	-6.79933	24.1642	11.5925	30169	33	227	6	2.64317	1.06471	383|1019|3718|6777|6778|7494	ARG1|CDK4|JAK3|STAT5B|STAT6|XBP1	-5.57871	-6.79933	24.1642
GO:0098801	GO Biological Processes	19	regulation of renal system process	-6.79933	24.1642	11.5925	30169	33	227	6	2.64317	1.06471	134|185|1636|1910|2149|6869	ADORA1|AGTR1|ACE|EDNRB|F2R|TACR1	-5.57871	-6.79933	44.301
GO:0031644	GO Biological Processes	19	regulation of nervous system process	-6.78999	9.16573	8.58204	30169	145	227	10	4.40529	1.36204	134|1890|1910|2149|2185|4988|6548|6714|7124|51738	ADORA1|TYMP|EDNRB|F2R|PTK2B|OPRM1|SLC9A1|SRC|TNF|GHRL	-5.56984	-6.78999	22.1505
GO:0071230	GO Biological Processes	19	cellular response to amino acid stimulus	-6.78192	13.2903	9.58406	30169	80	227	8	3.52423	1.22385	598|1786|1956|2475|4313|5156|7124|7494	BCL2L1|DNMT1|EGFR|MTOR|MMP2|PDGFRA|TNF|XBP1	-5.56224	-11.7619	14.9329
GO:0120034	GO Biological Processes	19	positive regulation of plasma membrane bounded cell projection assembly	-6.76604	10.7759	8.98432	30169	111	227	9	3.96476	1.29512	2475|2932|3265|3320|3815|5290|5295|5879|7046	MTOR|GSK3B|HRAS|HSP90AA1|KIT|PIK3CA|PIK3R1|RAC1|TGFBR1	-5.54729	-13.9473	22.9143
GO:1901222	GO Biological Processes	19	regulation of NIK/NF-kappaB signaling	-6.76604	10.7759	8.98432	30169	111	227	9	3.96476	1.29512	1956|2033|3553|7099|7124|10392|54106|64127|114548	EGFR|EP300|IL1B|TLR4|TNF|NOD1|TLR9|NOD2|NLRP3	-5.54729	-25.3768	31.6436
GO:0048738	GO Biological Processes	19	cardiac muscle tissue development	-6.75585	7.90235	8.19943	30169	185	227	11	4.84581	1.42523	25|983|1909|2475|3688|5156|5159|5915|6548|7046|7422	ABL1|CDK1|EDNRA|MTOR|ITGB1|PDGFRA|PDGFRB|RARB|SLC9A1|TGFBR1|VEGFA	-5.53756	-11.1994	132.903
GO:0030728	GO Biological Processes	19	ovulation	-6.73861	36.9175	13.272	30169	18	227	5	2.20264	0.974143	3248|4313|5241|5743|23411	HPGD|MMP2|PGR|PTGS2|SIRT1	-5.52079	-11.3698	39.8709
GO:0007159	GO Biological Processes	19	leukocyte cell-cell adhesion	-6.7309	16.9149	10.286	30169	55	227	7	3.0837	1.14742	3383|3553|3688|3695|6850|7124|7412	ICAM1|IL1B|ITGB1|ITGB7|SYK|TNF|VCAM1	-5.51447	-6.7309	30.6699
GO:0097006	GO Biological Processes	19	regulation of plasma lipoprotein particle levels	-6.7309	16.9149	10.286	30169	55	227	7	3.0837	1.14742	185|949|4353|5320|7941|8399|8694	AGTR1|SCARB1|MPO|PLA2G2A|PLA2G7|PLA2G10|DGAT1	-5.51447	-7.57119	41.5322
GO:1900087	GO Biological Processes	19	positive regulation of G1/S transition of mitotic cell cycle	-6.7309	16.9149	10.286	30169	55	227	7	3.0837	1.14742	207|595|894|1543|1956|4193|7015	AKT1|CCND1|CCND2|CYP1A1|EGFR|MDM2|TERT	-5.51447	-15.1858	23.7327
GO:0009112	GO Biological Processes	19	nucleobase metabolic process	-6.71774	23.4535	11.406	30169	34	227	6	2.64317	1.06471	1806|1890|2475|5594|7298|7498	DPYD|TYMP|MTOR|MAPK1|TYMS|XDH	-5.50177	-7.18594	44.301
GO:0097237	GO Biological Processes	19	cellular response to toxic substance	-6.69926	10.5852	8.88834	30169	113	227	9	3.96476	1.29512	2168|2950|4353|5742|5743|7124|9429|10327|57016	FABP1|GSTP1|MPO|PTGS1|PTGS2|TNF|ABCG2|AKR1A1|AKR1B10	-5.48376	-13.8981	11.0753
GO:0042509	GO Biological Processes	19	regulation of tyrosine phosphorylation of STAT protein	-6.69778	12.9662	9.44752	30169	82	227	8	3.52423	1.22385	3066|3558|3569|3572|3717|3815|7124|7132	HDAC2|IL2|IL6|IL6ST|JAK2|KIT|TNF|TNFRSF1A	-5.48366	-18.9652	56.9585
GO:0051149	GO Biological Processes	19	positive regulation of muscle cell differentiation	-6.69778	12.9662	9.44752	30169	82	227	8	3.52423	1.22385	596|1432|2475|3815|4193|4323|6469|23411	BCL2|MAPK14|MTOR|KIT|MDM2|MMP14|SHH|SIRT1	-5.48366	-8.44849	23.4535
GO:2000736	GO Biological Processes	19	regulation of stem cell differentiation	-6.69778	12.9662	9.44752	30169	82	227	8	3.52423	1.22385	25|2146|2247|2932|3065|3066|5156|6774	ABL1|EZH2|FGF2|GSK3B|HDAC1|HDAC2|PDGFRA|STAT3	-5.48366	-8.13474	56.9585
GO:0031647	GO Biological Processes	19	regulation of protein stability	-6.6964	5.72506	7.45703	30169	325	227	14	6.1674	1.59667	596|836|2033|3320|4193|5295|5347|5594|6714|6790|7015|8841|11200|23411	BCL2|CASP3|EP300|HSP90AA1|MDM2|PIK3R1|PLK1|MAPK1|SRC|AURKA|TERT|HDAC3|CHEK2|SIRT1	-5.48274	-6.6964	13.8441
GO:0030518	GO Biological Processes	19	intracellular steroid hormone receptor signaling pathway	-6.67568	16.6129	10.1823	30169	56	227	7	3.0837	1.14742	367|2099|2100|2908|3717|5241|6714	AR|ESR1|ESR2|NR3C1|JAK2|PGR|SRC	-5.46249	-20.0724	75.9446
GO:0006975	GO Biological Processes	19	DNA damage induced protein phosphorylation	-6.6708	66.4515	16.1208	30169	8	227	4	1.76211	0.87326	25|472|5595|11200	ABL1|ATM|MAPK3|CHEK2	-5.45898	-7.02588	66.4515
GO:0051709	GO Biological Processes	19	regulation of killing of cells of another organism	-6.6708	66.4515	16.1208	30169	8	227	4	1.76211	0.87326	598|4843|5551|6850	BCL2L1|NOS2|PRF1|SYK	-5.45898	-9.47431	66.4515
GO:1904179	GO Biological Processes	19	positive regulation of adipose tissue development	-6.6708	66.4515	16.1208	30169	8	227	4	1.76211	0.87326	5468|9971|23411|51738	PPARG|NR1H4|SIRT1|GHRL	-5.45898	-7.14366	66.4515
GO:0051604	GO Biological Processes	19	protein maturation	-6.66259	6.21489	7.60577	30169	278	227	13	5.72687	1.5422	142|834|836|841|1636|1803|2033|2152|2162|4311|4323|6469|7941	PARP1|CASP1|CASP3|CASP8|ACE|DPP4|EP300|F3|F13A1|MME|MMP14|SHH|PLA2G7	-5.45123	-6.66259	17.4872
GO:1903351	GO Biological Processes	19	cellular response to dopamine	-6.65656	12.8099	9.38102	30169	83	227	8	3.52423	1.22385	25|1131|2932|3066|3274|3356|5594|5595	ABL1|CHRM3|GSK3B|HDAC2|HRH2|HTR2A|MAPK1|MAPK3	-5.44566	-7.27499	12.8099
GO:0010821	GO Biological Processes	19	regulation of mitochondrion organization	-6.65226	8.86021	8.40286	30169	150	227	10	4.40529	1.36204	207|598|2033|2932|3091|3791|4318|5468|5599|6790	AKT1|BCL2L1|EP300|GSK3B|HIF1A|KDR|MMP9|PPARG|MAPK8|AURKA	-5.44181	-9.25504	10.4923
GO:0043433	GO Biological Processes	19	negative regulation of DNA-binding transcription factor activity	-6.63917	7.69439	8.05981	30169	190	227	11	4.84581	1.42523	1147|1545|2099|2146|3066|8399|9971|23411|54106|64127|114548	CHUK|CYP1B1|ESR1|EZH2|HDAC2|PLA2G10|NR1H4|SIRT1|TLR9|NOD2|NLRP3	-5.42918	-6.63917	9.79286
GO:0071482	GO Biological Processes	19	cellular response to light stimulus	-6.6338	10.4011	8.79473	30169	115	227	9	3.96476	1.29512	142|2033|4311|4313|4314|4318|5295|5743|23411	PARP1|EP300|MME|MMP2|MMP3|MMP9|PIK3R1|PTGS2|SIRT1	-5.42427	-19.0999	66.4515
GO:0042326	GO Biological Processes	19	negative regulation of phosphorylation	-6.63229	5.2324	7.23894	30169	381	227	15	6.60793	1.64883	25|207|623|624|836|2950|3486|3553|3558|5170|5347|5468|6774|7498|23411	ABL1|AKT1|BDKRB1|BDKRB2|CASP3|GSTP1|IGFBP3|IL1B|IL2|PDPK1|PLK1|PPARG|STAT3|XDH|SIRT1	-5.42321	-8.91747	8.71496
GO:0030902	GO Biological Processes	19	hindbrain development	-6.62534	8.80153	8.36803	30169	151	227	10	4.40529	1.36204	25|596|2146|2247|2735|3480|3688|5604|5781|6469	ABL1|BCL2|EZH2|FGF2|GLI1|IGF1R|ITGB1|MAP2K1|PTPN11|SHH	-5.41672	-6.62534	12.6574
GO:0010332	GO Biological Processes	19	response to gamma radiation	-6.62155	16.3214	10.0812	30169	57	227	7	3.0837	1.14742	142|472|596|598|3265|4193|11200	PARP1|ATM|BCL2|BCL2L1|HRAS|MDM2|CHEK2	-5.41338	-10.5861	22.9143
GO:0009895	GO Biological Processes	19	negative regulation of catabolic process	-6.61603	5.63831	7.37684	30169	330	227	14	6.1674	1.59667	134|207|596|1432|1956|2475|3553|4170|4233|4843|5290|6469|6774|7124	ADORA1|AKT1|BCL2|MAPK14|EGFR|MTOR|IL1B|MCL1|MET|NOS2|PIK3CA|SHH|STAT3|TNF	-5.40864	-6.61603	12.268
GO:1903350	GO Biological Processes	19	response to dopamine	-6.6159	12.6574	9.31566	30169	84	227	8	3.52423	1.22385	25|1131|2932|3066|3274|3356|5594|5595	ABL1|CHRM3|GSK3B|HDAC2|HRH2|HTR2A|MAPK1|MAPK3	-5.40864	-7.27499	12.8099
GO:0032412	GO Biological Processes	19	regulation of ion transmembrane transporter activity	-6.60924	6.14854	7.54979	30169	281	227	13	5.72687	1.5422	1080|1131|1394|1612|1909|2185|3688|4318|4842|4988|5243|6548|54106	CFTR|CHRM3|CRHR1|DAPK1|EDNRA|PTK2B|ITGB1|MMP9|NOS1|OPRM1|ABCB1|SLC9A1|TLR9	-5.40366	-8.37192	18.1231
GO:0035813	GO Biological Processes	19	regulation of renal sodium excretion	-6.60865	34.9745	12.8983	30169	19	227	5	2.20264	0.974143	134|185|1636|1910|6869	ADORA1|AGTR1|ACE|EDNRB|TACR1	-5.40366	-6.79933	44.301
GO:0045346	GO Biological Processes	19	regulation of MHC class II biosynthetic process	-6.60865	34.9745	12.8983	30169	19	227	5	2.20264	0.974143	3066|3717|7099|7494|23411	HDAC2|JAK2|TLR4|XBP1|SIRT1	-5.40366	-6.60865	37.9723
GO:0060438	GO Biological Processes	19	trachea development	-6.60865	34.9745	12.8983	30169	19	227	5	2.20264	0.974143	5594|5595|5604|6469|7048	MAPK1|MAPK3|MAP2K1|SHH|TGFBR2	-5.40366	-10.119	99.6773
GO:0060977	GO Biological Processes	19	coronary vasculature morphogenesis	-6.60865	34.9745	12.8983	30169	19	227	5	2.20264	0.974143	1636|2247|5159|7046|7422	ACE|FGF2|PDGFRB|TGFBR1|VEGFA	-5.40366	-7.8092	106.322
GO:0000079	GO Biological Processes	19	regulation of cyclin-dependent protein serine/threonine kinase activity	-6.56961	10.2233	8.7034	30169	117	227	9	3.96476	1.29512	207|595|836|890|891|894|1956|5347|6714	AKT1|CCND1|CASP3|CCNA2|CCNB1|CCND2|EGFR|PLK1|SRC	-5.36552	-15.1858	23.7327
GO:0045582	GO Biological Processes	19	positive regulation of T cell differentiation	-6.56961	10.2233	8.7034	30169	117	227	9	3.96476	1.29512	3123|3558|6469|6777|6850|7048|7494|10892|114548	HLA-DRB1|IL2|SHH|STAT5B|SYK|TGFBR2|XBP1|MALT1|NLRP3	-5.36552	-28.2991	25.5583
GO:0034446	GO Biological Processes	19	substrate adhesion-dependent cell spreading	-6.56846	16.04	9.98265	30169	58	227	7	3.0837	1.14742	25|673|3685|3695|5295|5879|6714	ABL1|BRAF|ITGAV|ITGB7|PIK3R1|RAC1|SRC	-5.36482	-8.50769	16.04
GO:0002294	GO Biological Processes	19	CD4-positive, alpha-beta T cell differentiation involved in immune response	-6.56234	22.1505	11.056	30169	36	227	6	2.64317	1.06471	2475|3569|5734|6097|6774|6778	MTOR|IL6|PTGER4|RORC|STAT3|STAT6	-5.36005	-11.4424	51.6845
GO:0042093	GO Biological Processes	19	T-helper cell differentiation	-6.56234	22.1505	11.056	30169	36	227	6	2.64317	1.06471	2475|3569|5734|6097|6774|6778	MTOR|IL6|PTGER4|RORC|STAT3|STAT6	-5.36005	-11.4424	51.6845
GO:0048008	GO Biological Processes	19	platelet-derived growth factor receptor signaling pathway	-6.56234	22.1505	11.056	30169	36	227	6	2.64317	1.06471	25|3717|5156|5159|5781|7422	ABL1|JAK2|PDGFRA|PDGFRB|PTPN11|VEGFA	-5.36005	-11.1994	132.903
GO:0016485	GO Biological Processes	19	protein processing	-6.50375	7.45885	7.89885	30169	196	227	11	4.84581	1.42523	142|834|836|841|1636|1803|2152|4311|4323|6469|7941	PARP1|CASP1|CASP3|CASP8|ACE|DPP4|F3|MME|MMP14|SHH|PLA2G7	-5.30191	-6.66259	17.4872
GO:0010660	GO Biological Processes	19	regulation of muscle cell apoptotic process	-6.49707	12.221	9.12604	30169	87	227	8	3.52423	1.22385	1786|2185|3480|3579|3717|5170|5468|23411	DNMT1|PTK2B|IGF1R|CXCR2|JAK2|PDPK1|PPARG|SIRT1	-5.29568	-6.49707	12.538
GO:0001933	GO Biological Processes	19	negative regulation of protein phosphorylation	-6.49043	5.50486	7.2519	30169	338	227	14	6.1674	1.59667	25|207|623|624|836|2950|3486|3553|3558|5170|5347|5468|7498|23411	ABL1|AKT1|BDKRB1|BDKRB2|CASP3|GSTP1|IGFBP3|IL1B|IL2|PDPK1|PLK1|PPARG|XDH|SIRT1	-5.28948	-8.91747	8.71496
GO:0002287	GO Biological Processes	19	alpha-beta T cell activation involved in immune response	-6.48823	21.5519	10.8914	30169	37	227	6	2.64317	1.06471	2475|3569|5734|6097|6774|6778	MTOR|IL6|PTGER4|RORC|STAT3|STAT6	-5.28906	-11.4424	51.6845
GO:0002293	GO Biological Processes	19	alpha-beta T cell differentiation involved in immune response	-6.48823	21.5519	10.8914	30169	37	227	6	2.64317	1.06471	2475|3569|5734|6097|6774|6778	MTOR|IL6|PTGER4|RORC|STAT3|STAT6	-5.28906	-11.4424	51.6845
GO:0051385	GO Biological Processes	19	response to mineralocorticoid	-6.48823	21.5519	10.8914	30169	37	227	6	2.64317	1.06471	142|595|1636|3480|6446|6714	PARP1|CCND1|ACE|IGF1R|SGK1|SRC	-5.28906	-6.87728	49.8387
GO:1902745	GO Biological Processes	19	positive regulation of lamellipodium organization	-6.48823	21.5519	10.8914	30169	37	227	6	2.64317	1.06471	2475|3320|5290|5295|5879|6714	MTOR|HSP90AA1|PIK3CA|PIK3R1|RAC1|SRC	-5.28906	-13.9473	22.9143
GO:0060749	GO Biological Processes	19	mammary gland alveolus development	-6.48638	33.2258	12.5524	30169	20	227	5	2.20264	0.974143	367|595|2099|3091|7422	AR|CCND1|ESR1|HIF1A|VEGFA	-5.28855	-6.48638	33.2258
GO:0061377	GO Biological Processes	19	mammary gland lobule development	-6.48638	33.2258	12.5524	30169	20	227	5	2.20264	0.974143	367|595|2099|3091|7422	AR|CCND1|ESR1|HIF1A|VEGFA	-5.28855	-6.48638	33.2258
GO:0098543	GO Biological Processes	19	detection of other organism	-6.48638	33.2258	12.5524	30169	20	227	5	2.20264	0.974143	3105|3123|7099|10392|64127	HLA-A|HLA-DRB1|TLR4|NOD1|NOD2	-5.28855	-8.24926	59.068
GO:1904029	GO Biological Processes	19	regulation of cyclin-dependent protein kinase activity	-6.47561	9.96773	8.57046	30169	120	227	9	3.96476	1.29512	207|595|836|890|891|894|1956|5347|6714	AKT1|CCND1|CASP3|CCNA2|CCNB1|CCND2|EGFR|PLK1|SRC	-5.27822	-15.1858	23.7327
GO:0055007	GO Biological Processes	19	cardiac muscle cell differentiation	-6.45848	12.0821	9.0649	30169	88	227	8	3.52423	1.22385	983|2475|3688|5156|5159|5915|6548|7422	CDK1|MTOR|ITGB1|PDGFRA|PDGFRB|RARB|SLC9A1|VEGFA	-5.26154	-11.1994	132.903
GO:0031652	GO Biological Processes	19	positive regulation of heat generation	-6.4181	59.068	15.1701	30169	9	227	4	1.76211	0.87326	3553|5733|5743|7124	IL1B|PTGER3|PTGS2|TNF	-5.22248	-11.6147	75.9446
GO:0060056	GO Biological Processes	19	mammary gland involution	-6.4181	59.068	15.1701	30169	9	227	4	1.76211	0.87326	383|3488|4790|7421	ARG1|IGFBP5|NFKB1|VDR	-5.22248	-6.96925	75.9446
GO:0098792	GO Biological Processes	19	xenophagy	-6.4181	59.068	15.1701	30169	9	227	4	1.76211	0.87326	3964|5595|10392|64127	LGALS8|MAPK3|NOD1|NOD2	-5.22248	-8.24926	59.068
GO:0002724	GO Biological Processes	19	regulation of T cell cytokine production	-6.41632	20.9847	10.7332	30169	38	227	6	2.64317	1.06471	383|3105|3553|3569|10892|114548	ARG1|HLA-A|IL1B|IL6|MALT1|NLRP3	-5.22159	-28.2991	25.5583
GO:0043029	GO Biological Processes	19	T cell homeostasis	-6.41632	20.9847	10.7332	30169	38	227	6	2.64317	1.06471	207|596|836|3718|6777|11035	AKT1|BCL2|CASP3|JAK3|STAT5B|RIPK3	-5.22159	-8.93912	20.9847
GO:0035710	GO Biological Processes	19	CD4-positive, alpha-beta T cell activation	-6.41511	15.2512	9.70109	30169	61	227	7	3.0837	1.14742	673|2475|3569|5734|6097|6774|6778	BRAF|MTOR|IL6|PTGER4|RORC|STAT3|STAT6	-5.22082	-11.4424	51.6845
GO:0006959	GO Biological Processes	19	humoral immune response	-6.40244	5.89672	7.33371	30169	293	227	13	5.72687	1.5422	240|596|1991|2147|3105|3123|3569|3576|3960|5319|6480|7124|64127	ALOX5|BCL2|ELANE|F2|HLA-A|HLA-DRB1|IL6|CXCL8|LGALS4|PLA2G1B|ST6GAL1|TNF|NOD2	-5.20859	-6.40244	132.903
GO:0060491	GO Biological Processes	19	regulation of cell projection assembly	-6.39452	7.2733	7.76982	30169	201	227	11	4.84581	1.42523	2475|2932|3265|3320|3383|3815|5290|5295|5879|6714|7046	MTOR|GSK3B|HRAS|HSP90AA1|ICAM1|KIT|PIK3CA|PIK3R1|RAC1|SRC|TGFBR1	-5.20111	-13.9473	22.9143
GO:0002775	GO Biological Processes	19	antimicrobial peptide production	-6.37632	132.903	19.8931	30169	3	227	3	1.32159	0.757959	1991|3960|64127	ELANE|LGALS4|NOD2	-5.18554	-6.40244	132.903
GO:0002777	GO Biological Processes	19	antimicrobial peptide biosynthetic process	-6.37632	132.903	19.8931	30169	3	227	3	1.32159	0.757959	1991|3960|64127	ELANE|LGALS4|NOD2	-5.18554	-6.40244	132.903
GO:0002778	GO Biological Processes	19	antibacterial peptide production	-6.37632	132.903	19.8931	30169	3	227	3	1.32159	0.757959	1991|3960|64127	ELANE|LGALS4|NOD2	-5.18554	-6.40244	132.903
GO:0002780	GO Biological Processes	19	antibacterial peptide biosynthetic process	-6.37632	132.903	19.8931	30169	3	227	3	1.32159	0.757959	1991|3960|64127	ELANE|LGALS4|NOD2	-5.18554	-6.40244	132.903
GO:0038086	GO Biological Processes	19	VEGF-activated platelet-derived growth factor receptor signaling pathway	-6.37632	132.903	19.8931	30169	3	227	3	1.32159	0.757959	5156|5159|7422	PDGFRA|PDGFRB|VEGFA	-5.18554	-11.1994	132.903
GO:0038091	GO Biological Processes	19	positive regulation of cell proliferation by VEGF-activated platelet derived growth factor receptor signaling pathway	-6.37632	132.903	19.8931	30169	3	227	3	1.32159	0.757959	5156|5159|7422	PDGFRA|PDGFRB|VEGFA	-5.18554	-11.1994	132.903
GO:0002042	GO Biological Processes	19	cell migration involved in sprouting angiogenesis	-6.37095	31.6436	12.2311	30169	21	227	5	2.20264	0.974143	207|2247|3688|3791|7422	AKT1|FGF2|ITGB1|KDR|VEGFA	-5.18147	-18.7692	49.8387
GO:0071498	GO Biological Processes	19	cellular response to fluid shear stress	-6.37095	31.6436	12.2311	30169	21	227	5	2.20264	0.974143	2185|4313|5743|6714|8841	PTK2B|MMP2|PTGS2|SRC|HDAC3	-5.18147	-9.85609	49.8387
GO:0071637	GO Biological Processes	19	regulation of monocyte chemotactic protein-1 production	-6.37095	31.6436	12.2311	30169	21	227	5	2.20264	0.974143	2950|3553|6850|9971|64127	GSTP1|IL1B|SYK|NR1H4|NOD2	-5.18147	-6.37095	31.6436
GO:0006081	GO Biological Processes	19	cellular aldehyde metabolic process	-6.36585	15.0052	9.61162	30169	62	227	7	3.0837	1.14742	217|249|1545|1910|3417|7086|10327	ALDH2|ALPL|CYP1B1|EDNRB|IDH1|TKT|AKR1A1	-5.17681	-6.36585	15.0052
GO:0048645	GO Biological Processes	19	animal organ formation	-6.3465	20.4466	10.5809	30169	39	227	6	2.64317	1.06471	367|5594|5595|5604|6469|7048	AR|MAPK1|MAPK3|MAP2K1|SHH|TGFBR2	-5.15789	-10.119	99.6773
GO:0032481	GO Biological Processes	19	positive regulation of type I interferon production	-6.31747	14.767	9.52421	30169	63	227	7	3.0837	1.14742	1147|3320|5781|6772|6850|7099|54106	CHUK|HSP90AA1|PTPN11|STAT1|SYK|TLR4|TLR9	-5.1306	-11.5766	51.6845
GO:0032655	GO Biological Processes	19	regulation of interleukin-12 production	-6.31747	14.767	9.52421	30169	63	227	7	3.0837	1.14742	1432|3718|4790|6850|7099|54106|64127	MAPK14|JAK3|NFKB1|SYK|TLR4|TLR9|NOD2	-5.1306	-11.5766	51.6845
GO:0033077	GO Biological Processes	19	T cell differentiation in thymus	-6.31747	14.767	9.52421	30169	63	227	7	3.0837	1.14742	25|596|673|2064|6469|6777|11035	ABL1|BCL2|BRAF|ERBB2|SHH|STAT5B|RIPK3	-5.1306	-7.87424	56.9585
GO:0050805	GO Biological Processes	19	negative regulation of synaptic transmission	-6.31747	14.767	9.52421	30169	63	227	7	3.0837	1.14742	134|673|1269|2185|3356|3553|5743	ADORA1|BRAF|CNR2|PTK2B|HTR2A|IL1B|PTGS2	-5.1306	-13.8324	23.0365
GO:0090277	GO Biological Processes	19	positive regulation of peptide hormone secretion	-6.30887	11.5568	8.82987	30169	92	227	8	3.52423	1.22385	1080|2645|3091|3123|3717|5467|9971|51738	CFTR|GCK|HIF1A|HLA-DRB1|JAK2|PPARD|NR1H4|GHRL	-5.12244	-26.71	29.534
GO:0034341	GO Biological Processes	19	response to interferon-gamma	-6.29533	9.49308	8.31811	30169	126	227	9	3.96476	1.29512	834|1612|3716|3717|4843|6198|6772|7099|7124	CASP1|DAPK1|JAK1|JAK2|NOS2|RPS6KB1|STAT1|TLR4|TNF	-5.10932	-13.5751	79.7419
GO:0010762	GO Biological Processes	19	regulation of fibroblast migration	-6.27864	19.9355	10.4342	30169	40	227	6	2.64317	1.06471	207|673|2247|3688|5747|5879	AKT1|BRAF|FGF2|ITGB1|PTK2|RAC1	-5.09437	-6.27864	39.8709
GO:0032965	GO Biological Processes	19	regulation of collagen biosynthetic process	-6.27864	19.9355	10.4342	30169	40	227	6	2.64317	1.06471	2147|2149|3066|3569|5159|5467	F2|F2R|HDAC2|IL6|PDGFRB|PPARD	-5.09437	-7.35367	20.6738
GO:0060612	GO Biological Processes	19	adipose tissue development	-6.27864	19.9355	10.4342	30169	40	227	6	2.64317	1.06471	1019|3265|5290|5467|6097|7494	CDK4|HRAS|PIK3CA|PPARD|RORC|XBP1	-5.09437	-6.27864	19.9355
GO:0071392	GO Biological Processes	19	cellular response to estradiol stimulus	-6.27864	19.9355	10.4342	30169	40	227	6	2.64317	1.06471	890|1956|2099|2100|3480|4313	CCNA2|EGFR|ESR1|ESR2|IGF1R|MMP2	-5.09437	-16.3188	19.9355
GO:1903320	GO Biological Processes	19	regulation of protein modification by small protein conjugation or removal	-6.2762	6.32872	7.39622	30169	252	227	12	5.28634	1.48515	25|207|330|331|2034|3091|3320|5347|7046|8841|10892|64127	ABL1|AKT1|BIRC3|XIAP|EPAS1|HIF1A|HSP90AA1|PLK1|TGFBR1|HDAC3|MALT1|NOD2	-5.09236	-6.2762	30.6699
GO:0042303	GO Biological Processes	19	molting cycle	-6.27261	11.4325	8.77337	30169	93	227	8	3.52423	1.22385	596|1956|3065|3066|3488|5743|6469|8399	BCL2|EGFR|HDAC1|HDAC2|IGFBP5|PTGS2|SHH|PLA2G10	-5.09005	-6.27261	19.9355
GO:0042633	GO Biological Processes	19	hair cycle	-6.27261	11.4325	8.77337	30169	93	227	8	3.52423	1.22385	596|1956|3065|3066|3488|5743|6469|8399	BCL2|EGFR|HDAC1|HDAC2|IGFBP5|PTGS2|SHH|PLA2G10	-5.09005	-6.27261	19.9355
GO:1904427	GO Biological Processes	19	positive regulation of calcium ion transmembrane transport	-6.27261	11.4325	8.77337	30169	93	227	8	3.52423	1.22385	25|623|2147|2149|2539|5170|5319|6548	ABL1|BDKRB1|F2|F2R|G6PD|PDPK1|PLA2G1B|SLC9A1	-5.09005	-19.6206	16.2077
GO:0002218	GO Biological Processes	19	activation of innate immune response	-6.26993	14.5363	9.43877	30169	64	227	7	3.0837	1.14742	2033|3320|3551|6714|6850|7099|54106	EP300|HSP90AA1|IKBKB|SRC|SYK|TLR4|TLR9	-5.0878	-16.2489	24.1642
GO:0048167	GO Biological Processes	19	regulation of synaptic plasticity	-6.26753	7.06248	7.62072	30169	207	227	11	4.84581	1.42523	25|134|673|1636|2185|2932|3265|3815|4311|5594|5743	ABL1|ADORA1|BRAF|ACE|PTK2B|GSK3B|HRAS|KIT|MME|MAPK1|PTGS2	-5.08583	-13.8324	23.0365
GO:0002070	GO Biological Processes	19	epithelial cell maturation	-6.26164	30.2052	11.9315	30169	22	227	5	2.20264	0.974143	2034|3091|3791|5241|7298	EPAS1|HIF1A|KDR|PGR|TYMS	-5.08335	-17.2451	37.9723
GO:0006809	GO Biological Processes	19	nitric oxide biosynthetic process	-6.26164	30.2052	11.9315	30169	22	227	5	2.20264	0.974143	207|1545|4842|4843|7099	AKT1|CYP1B1|NOS1|NOS2|TLR4	-5.08335	-8.50307	44.301
GO:0010888	GO Biological Processes	19	negative regulation of lipid storage	-6.26164	30.2052	11.9315	30169	22	227	5	2.20264	0.974143	3569|3685|5467|5468|7124	IL6|ITGAV|PPARD|PPARG|TNF	-5.08335	-14.3686	30.2052
GO:0042088	GO Biological Processes	19	T-helper 1 type immune response	-6.26164	30.2052	11.9315	30169	22	227	5	2.20264	0.974143	2475|3123|3265|6778|7099	MTOR|HLA-DRB1|HRAS|STAT6|TLR4	-5.08335	-6.26164	30.2052
GO:0044062	GO Biological Processes	19	regulation of excretion	-6.26164	30.2052	11.9315	30169	22	227	5	2.20264	0.974143	134|185|1636|1910|6869	ADORA1|AGTR1|ACE|EDNRB|TACR1	-5.08335	-6.79933	44.301
GO:0044321	GO Biological Processes	19	response to leptin	-6.26164	30.2052	11.9315	30169	22	227	5	2.20264	0.974143	595|890|2645|6774|23411	CCND1|CCNA2|GCK|STAT3|SIRT1	-5.08335	-11.9947	30.2052
GO:0060444	GO Biological Processes	19	branching involved in mammary gland duct morphogenesis	-6.26164	30.2052	11.9315	30169	22	227	5	2.20264	0.974143	367|2099|5241|6714|7421	AR|ESR1|PGR|SRC|VDR	-5.08335	-20.0724	75.9446
GO:1903209	GO Biological Processes	19	positive regulation of oxidative stress-induced cell death	-6.26164	30.2052	11.9315	30169	22	227	5	2.20264	0.974143	25|4170|4314|7099|7124	ABL1|MCL1|MMP3|TLR4|TNF	-5.08335	-10.0186	56.9585
GO:0031668	GO Biological Processes	19	cellular response to extracellular stimulus	-6.2398	6.27889	7.35632	30169	254	227	12	5.28634	1.48515	136|596|2475|3480|5594|5595|5599|7412|7421|7494|9971|23411	ADORA2B|BCL2|MTOR|IGF1R|MAPK1|MAPK3|MAPK8|VCAM1|VDR|XBP1|NR1H4|SIRT1	-5.06193	-10.119	99.6773
GO:0046683	GO Biological Processes	19	response to organophosphorus	-6.23738	9.34475	8.23772	30169	128	227	9	3.96476	1.29512	196|1080|1545|2185|3488|3553|5743|6772|7298	AHR|CFTR|CYP1B1|PTK2B|IGFBP5|IL1B|PTGS2|STAT1|TYMS	-5.05994	-6.87525	9.35937
GO:0002292	GO Biological Processes	19	T cell differentiation involved in immune response	-6.21265	19.4492	10.2927	30169	41	227	6	2.64317	1.06471	2475|3569|5734|6097|6774|6778	MTOR|IL6|PTGER4|RORC|STAT3|STAT6	-5.0369	-11.4424	51.6845
GO:0007595	GO Biological Processes	19	lactation	-6.21265	19.4492	10.2927	30169	41	227	6	2.64317	1.06471	595|3091|6777|7421|7422|7498	CCND1|HIF1A|STAT5B|VDR|VEGFA|XDH	-5.0369	-10.5172	19.4492
GO:0030574	GO Biological Processes	19	collagen catabolic process	-6.21265	19.4492	10.2927	30169	41	227	6	2.64317	1.06471	1508|4313|4314|4316|4318|4323	CTSB|MMP2|MMP3|MMP7|MMP9|MMP14	-5.0369	-7.66463	20.2244
GO:0032733	GO Biological Processes	19	positive regulation of interleukin-10 production	-6.21265	19.4492	10.2927	30169	41	227	6	2.64317	1.06471	3569|6774|6850|7099|54106|64127	IL6|STAT3|SYK|TLR4|TLR9|NOD2	-5.0369	-11.5766	51.6845
GO:0055065	GO Biological Processes	19	metal ion homeostasis	-6.20253	4.8387	6.831	30169	412	227	15	6.60793	1.64883	134|249|331|479|596|1909|1910|1991|2034|2147|3091|3356|3791|6548|7421	ADORA1|ALPL|XIAP|ATP12A|BCL2|EDNRA|EDNRB|ELANE|EPAS1|F2|HIF1A|HTR2A|KDR|SLC9A1|VDR	-5.0272	-13.0748	10.7396
GO:0097267	GO Biological Processes	19	omega-hydroxylase P450 pathway	-6.19882	53.1612	14.3643	30169	10	227	4	1.76211	0.87326	1543|1544|1545|1557	CYP1A1|CYP1A2|CYP1B1|CYP2C19	-5.02391	-12.4171	66.4515
GO:0003073	GO Biological Processes	19	regulation of systemic arterial blood pressure	-6.16638	11.0753	8.60893	30169	96	227	8	3.52423	1.22385	134|185|367|1636|1910|2149|6869|7124	ADORA1|AGTR1|AR|ACE|EDNRB|F2R|TACR1|TNF	-4.99301	-6.79933	44.301
GO:0051153	GO Biological Processes	19	regulation of striated muscle cell differentiation	-6.16638	11.0753	8.60893	30169	96	227	8	3.52423	1.22385	596|1432|2146|2475|2539|4323|6469|7494	BCL2|MAPK14|EZH2|MTOR|G6PD|MMP14|SHH|XBP1	-4.99301	-8.44849	23.4535
GO:0070664	GO Biological Processes	19	negative regulation of leukocyte proliferation	-6.16638	11.0753	8.60893	30169	96	227	8	3.52423	1.22385	383|472|836|2064|2950|3123|3558|6469	ARG1|ATM|CASP3|ERBB2|GSTP1|HLA-DRB1|IL2|SHH	-4.99301	-11.5568	33.2258
GO:0032989	GO Biological Processes	19	cellular component morphogenesis	-6.16624	4.02737	6.48846	30169	594	227	18	7.92952	1.79337	596|598|1909|2064|3320|3480|3688|5156|5159|5747|5781|5879|5979|6446|6469|6790|7422|8399	BCL2|BCL2L1|EDNRA|ERBB2|HSP90AA1|IGF1R|ITGB1|PDGFRA|PDGFRB|PTK2|PTPN11|RAC1|RET|SGK1|SHH|AURKA|VEGFA|PLA2G10	-4.99301	-12.238	7.3835
GO:0002446	GO Biological Processes	19	neutrophil mediated immunity	-6.15785	28.892	11.6513	30169	23	227	5	2.20264	0.974143	1636|1991|2147|3569|5319	ACE|ELANE|F2|IL6|PLA2G1B	-4.98588	-13.99	28.892
GO:0035162	GO Biological Processes	19	embryonic hemopoiesis	-6.15785	28.892	11.6513	30169	23	227	5	2.20264	0.974143	3091|3791|3815|7048|7422	HIF1A|KDR|KIT|TGFBR2|VEGFA	-4.98588	-6.15785	28.892
GO:1902254	GO Biological Processes	19	negative regulation of intrinsic apoptotic signaling pathway by p53 class mediator	-6.15785	28.892	11.6513	30169	23	227	5	2.20264	0.974143	596|624|4193|4282|23411	BCL2|BDKRB2|MDM2|MIF|SIRT1	-4.98588	-9.91433	44.301
GO:0034250	GO Biological Processes	19	positive regulation of cellular amide metabolic process	-6.14947	7.81783	7.76181	30169	170	227	10	4.40529	1.36204	836|1545|2064|2185|2475|3569|5315|6198|7124|64127	CASP3|CYP1B1|ERBB2|PTK2B|MTOR|IL6|PKM|RPS6KB1|TNF|NOD2	-4.97938	-6.14947	7.81783
GO:0042176	GO Biological Processes	19	regulation of protein catabolic process	-6.14852	5.15414	6.91375	30169	361	227	14	6.1674	1.59667	207|1017|1956|2932|3320|3553|4193|4843|4953|5347|6469|6790|7124|11200	AKT1|CDK2|EGFR|GSK3B|HSP90AA1|IL1B|MDM2|NOS2|ODC1|PLK1|SHH|AURKA|TNF|CHEK2	-4.97938	-6.14852	8.45747
GO:0008625	GO Biological Processes	19	extrinsic apoptotic signaling pathway via death domain receptors	-6.14843	18.9862	10.1562	30169	42	227	6	2.64317	1.06471	596|841|1612|5295|7124|7132	BCL2|CASP8|DAPK1|PIK3R1|TNF|TNFRSF1A	-4.97938	-21.1895	20.3046
GO:0038061	GO Biological Processes	19	NIK/NF-kappaB signaling	-6.14843	18.9862	10.1562	30169	42	227	6	2.64317	1.06471	207|330|1147|10892|11035|64127	AKT1|BIRC3|CHUK|MALT1|RIPK3|NOD2	-4.97938	-6.2762	30.6699
GO:0055090	GO Biological Processes	19	acylglycerol homeostasis	-6.14843	18.9862	10.1562	30169	42	227	6	2.64317	1.06471	134|949|3172|7494|9971|23411	ADORA1|SCARB1|HNF4A|XBP1|NR1H4|SIRT1	-4.97938	-7.14366	66.4515
GO:0070328	GO Biological Processes	19	triglyceride homeostasis	-6.14843	18.9862	10.1562	30169	42	227	6	2.64317	1.06471	134|949|3172|7494|9971|23411	ADORA1|SCARB1|HNF4A|XBP1|NR1H4|SIRT1	-4.97938	-7.14366	66.4515
GO:0071887	GO Biological Processes	19	leukocyte apoptotic process	-6.14843	18.9862	10.1562	30169	42	227	6	2.64317	1.06471	207|596|598|836|3569|11200	AKT1|BCL2|BCL2L1|CASP3|IL6|CHEK2	-4.97938	-6.14843	26.5806
GO:0002221	GO Biological Processes	19	pattern recognition receptor signaling pathway	-6.1318	10.9611	8.55573	30169	97	227	8	3.52423	1.22385	834|7099|7124|9971|10392|54106|64127|114548	CASP1|TLR4|TNF|NR1H4|NOD1|TLR9|NOD2|NLRP3	-4.96399	-11.5766	51.6845
GO:0030168	GO Biological Processes	19	platelet activation	-6.1318	10.9611	8.55573	30169	97	227	8	3.52423	1.22385	1432|2147|2149|3569|5156|5290|6714|6850	MAPK14|F2|F2R|IL6|PDGFRA|PIK3CA|SRC|SYK	-4.96399	-29.2377	11.7003
GO:0043502	GO Biological Processes	19	regulation of muscle adaptation	-6.1318	10.9611	8.55573	30169	97	227	8	3.52423	1.22385	142|2539|3488|3572|5468|6198|6548|7132	PARP1|G6PD|IGFBP5|IL6ST|PPARG|RPS6KB1|SLC9A1|TNFRSF1A	-4.96399	-6.1318	13.9898
GO:0008544	GO Biological Processes	19	epidermis development	-6.1262	5.57336	7.04732	30169	310	227	13	5.72687	1.5422	596|836|1956|2146|2247|2735|3065|3066|3123|3488|5604|6469|8399	BCL2|CASP3|EGFR|EZH2|FGF2|GLI1|HDAC1|HDAC2|HLA-DRB1|IGFBP5|MAP2K1|SHH|PLA2G10	-4.95916	-6.27261	19.9355
GO:1904064	GO Biological Processes	19	positive regulation of cation transmembrane transport	-6.12613	7.77211	7.73253	30169	171	227	10	4.40529	1.36204	25|623|1909|2147|2149|2539|4842|5170|5319|6548	ABL1|BDKRB1|EDNRA|F2|F2R|G6PD|NOS1|PDPK1|PLA2G1B|SLC9A1	-4.95916	-19.6206	16.2077
GO:0098754	GO Biological Processes	19	detoxification	-6.12452	9.06157	8.0821	30169	132	227	9	3.96476	1.29512	2168|2950|4353|5243|5742|5743|9429|10327|57016	FABP1|GSTP1|MPO|ABCB1|PTGS1|PTGS2|ABCG2|AKR1A1|AKR1B10	-4.95795	-13.8981	11.0753
GO:0044282	GO Biological Processes	19	small molecule catabolic process	-6.12004	5.12574	6.88571	30169	363	227	14	6.1674	1.59667	217|383|949|1543|1576|1806|2645|4842|4843|5315|5467|7498|10327|57016	ALDH2|ARG1|SCARB1|CYP1A1|CYP3A4|DPYD|GCK|NOS1|NOS2|PKM|PPARD|XDH|AKR1A1|AKR1B10	-4.95389	-6.12004	5.12574
GO:0035303	GO Biological Processes	19	regulation of dephosphorylation	-6.09691	8.99344	8.04423	30169	133	227	9	3.96476	1.29512	134|2475|2932|3551|3717|5159|6714|7124|11035	ADORA1|MTOR|GSK3B|IKBKB|JAK2|PDGFRB|SRC|TNF|RIPK3	-4.93117	-6.09691	18.1231
GO:0098609	GO Biological Processes	19	cell-cell adhesion	-6.0889	4.19175	6.51033	30169	539	227	17	7.48899	1.74701	25|596|1545|1956|3383|3553|3685|3688|3695|3815|5156|5979|6714|6850|7048|7124|7412	ABL1|BCL2|CYP1B1|EGFR|ICAM1|IL1B|ITGAV|ITGB1|ITGB7|KIT|PDGFRA|RET|SRC|SYK|TGFBR2|TNF|VCAM1	-4.92358	-6.7309	30.6699
GO:0007566	GO Biological Processes	19	embryo implantation	-6.08589	18.5446	10.0243	30169	43	227	6	2.64317	1.06471	3553|4313|4318|5467|5743|7048	IL1B|MMP2|MMP9|PPARD|PTGS2|TGFBR2	-4.92221	-8.86959	30.6699
GO:0045687	GO Biological Processes	19	positive regulation of glial cell differentiation	-6.08589	18.5446	10.0243	30169	43	227	6	2.64317	1.06471	2475|3065|3066|3572|6469|7852	MTOR|HDAC1|HDAC2|IL6ST|SHH|CXCR4	-4.92221	-18.317	26.5806
GO:0051602	GO Biological Processes	19	response to electrical stimulus	-6.08589	18.5446	10.0243	30169	43	227	6	2.64317	1.06471	4313|6198|6548|6714|6869|51738	MMP2|RPS6KB1|SLC9A1|SRC|TACR1|GHRL	-4.92221	-6.08589	18.5446
GO:0071364	GO Biological Processes	19	cellular response to epidermal growth factor stimulus	-6.08589	18.5446	10.0243	30169	43	227	6	2.64317	1.06471	207|1956|2064|5170|5781|6777	AKT1|EGFR|ERBB2|PDPK1|PTPN11|STAT5B	-4.92221	-13.5093	29.8354
GO:0072073	GO Biological Processes	19	kidney epithelium development	-6.06954	8.92633	8.00675	30169	134	227	9	3.96476	1.29512	596|1909|1910|2246|2247|3579|5915|5979|6469	BCL2|EDNRA|EDNRB|FGF1|FGF2|CXCR2|RARB|RET|SHH	-4.90626	-14.6196	49.8387
GO:0006885	GO Biological Processes	19	regulation of pH	-6.06382	10.7396	8.45162	30169	99	227	8	3.52423	1.22385	479|596|887|1080|1910|5594|5595|6548	ATP12A|BCL2|CCKBR|CFTR|EDNRB|MAPK1|MAPK3|SLC9A1	-4.90095	-13.0748	10.7396
GO:0032094	GO Biological Processes	19	response to food	-6.05906	27.6881	11.3884	30169	24	227	5	2.20264	0.974143	207|1543|2539|4353|4988	AKT1|CYP1A1|G6PD|MPO|OPRM1	-4.89701	-6.05906	27.6881
GO:0036120	GO Biological Processes	19	cellular response to platelet-derived growth factor stimulus	-6.05906	27.6881	11.3884	30169	24	227	5	2.20264	0.974143	890|3065|5159|6714|7099	CCNA2|HDAC1|PDGFRB|SRC|TLR4	-4.89701	-12.9593	27.6881
GO:0055088	GO Biological Processes	19	lipid homeostasis	-6.05707	7.63811	7.64611	30169	174	227	10	4.40529	1.36204	134|949|3172|5468|7494|8399|8694|9971|23411|29881	ADORA1|SCARB1|HNF4A|PPARG|XBP1|PLA2G10|DGAT1|NR1H4|SIRT1|NPC1L1	-4.89543	-7.14366	66.4515
GO:0055021	GO Biological Processes	19	regulation of cardiac muscle tissue growth	-6.04403	13.4829	9.03864	30169	69	227	7	3.0837	1.14742	983|1432|2247|2539|2735|7046|7048	CDK1|MAPK14|FGF2|G6PD|GLI1|TGFBR1|TGFBR2	-4.88281	-12.9368	17.7204
GO:0007160	GO Biological Processes	19	cell-matrix adhesion	-6.04239	8.86021	7.96966	30169	135	227	9	3.96476	1.29512	596|2185|3685|3688|3695|5879|6714|7412|10855	BCL2|PTK2B|ITGAV|ITGB1|ITGB7|RAC1|SRC|VCAM1|HPSE	-4.88173	-8.50769	16.04
GO:0030029	GO Biological Processes	19	actin filament-based process	-6.04214	3.94762	6.38232	30169	606	227	18	7.92952	1.79337	25|596|673|2185|3551|3688|3717|3815|5156|5159|5170|5290|5319|5879|6548|6714|7124|51738	ABL1|BCL2|BRAF|PTK2B|IKBKB|ITGB1|JAK2|KIT|PDGFRA|PDGFRB|PDPK1|PIK3CA|PLA2G1B|RAC1|SLC9A1|SRC|TNF|GHRL	-4.88173	-8.50769	16.04
GO:0030036	GO Biological Processes	19	actin cytoskeleton organization	-6.03408	4.15322	6.46205	30169	544	227	17	7.48899	1.74701	25|596|673|2185|3551|3688|3717|3815|5156|5159|5170|5290|5319|5879|6714|7124|51738	ABL1|BCL2|BRAF|PTK2B|IKBKB|ITGB1|JAK2|KIT|PDGFRA|PDGFRB|PDPK1|PIK3CA|PLA2G1B|RAC1|SRC|TNF|GHRL	-4.87408	-8.50769	16.04
GO:0006721	GO Biological Processes	19	terpenoid metabolic process	-6.0304	10.6322	8.40067	30169	100	227	8	3.52423	1.22385	1543|1544|1545|1557|1576|5467|8694|57016	CYP1A1|CYP1A2|CYP1B1|CYP2C19|CYP3A4|PPARD|DGAT1|AKR1B10	-4.87081	-12.4171	66.4515
GO:0010828	GO Biological Processes	19	positive regulation of glucose transmembrane transport	-6.02495	18.1231	9.89674	30169	44	227	6	2.64317	1.06471	207|673|1432|5295|5781|7015	AKT1|BRAF|MAPK14|PIK3R1|PTPN11|TERT	-4.86657	-12.231	20.7122
GO:0014075	GO Biological Processes	19	response to amine	-6.02495	18.1231	9.89674	30169	44	227	6	2.64317	1.06471	383|983|1269|1909|3066|3717	ARG1|CDK1|CNR2|EDNRA|HDAC2|JAK2	-4.86657	-6.02495	35.4408
GO:1905521	GO Biological Processes	19	regulation of macrophage migration	-6.02495	18.1231	9.89674	30169	44	227	6	2.64317	1.06471	2185|4282|4323|5594|5595|5747	PTK2B|MIF|MMP14|MAPK1|MAPK3|PTK2	-4.86657	-10.119	99.6773
GO:0071492	GO Biological Processes	19	cellular response to UV-A	-6.0051	48.3284	13.6698	30169	11	227	4	1.76211	0.87326	4311|4313|4314|4318	MME|MMP2|MMP3|MMP9	-4.84713	-19.0999	66.4515
GO:0001570	GO Biological Processes	19	vasculogenesis	-6.00104	13.2903	8.96358	30169	70	227	7	3.0837	1.14742	3685|3791|5159|6469|7048|7422|57007	ITGAV|KDR|PDGFRB|SHH|TGFBR2|VEGFA|ACKR3	-4.84388	-6.15785	28.892
GO:0051881	GO Biological Processes	19	regulation of mitochondrial membrane potential	-6.00104	13.2903	8.96358	30169	70	227	7	3.0837	1.14742	25|142|207|596|598|3791|6714	ABL1|PARP1|AKT1|BCL2|BCL2L1|KDR|SRC	-4.84388	-8.24853	29.534
GO:0007179	GO Biological Processes	19	transforming growth factor beta receptor signaling pathway	-5.99736	10.527	8.35044	30169	101	227	8	3.52423	1.22385	142|3248|5747|6714|6774|7046|7048|23411	PARP1|HPGD|PTK2|SRC|STAT3|TGFBR1|TGFBR2|SIRT1	-4.8406	-9.5033	10.7313
GO:0051099	GO Biological Processes	19	positive regulation of binding	-5.98936	7.50865	7.56172	30169	177	227	10	4.40529	1.36204	25|142|1636|2033|2932|3717|4233|4318|5468|7015	ABL1|PARP1|ACE|EP300|GSK3B|JAK2|MET|MMP9|PPARG|TERT	-4.833	-9.25504	10.4923
GO:0050866	GO Biological Processes	19	negative regulation of cell activation	-5.98721	6.61509	7.29482	30169	221	227	11	4.84581	1.42523	383|472|836|1269|2064|2147|3123|3558|3718|5156|6469	ARG1|ATM|CASP3|CNR2|ERBB2|F2|HLA-DRB1|IL2|JAK3|PDGFRA|SHH	-4.83126	-11.5568	33.2258
GO:0036336	GO Biological Processes	19	dendritic cell migration	-5.96481	26.5806	11.1411	30169	25	227	5	2.20264	0.974143	240|1234|3577|3579|7852	ALOX5|CCR5|CXCR1|CXCR2|CXCR4	-4.81087	-17.3867	29.534
GO:0046209	GO Biological Processes	19	nitric oxide metabolic process	-5.96481	26.5806	11.1411	30169	25	227	5	2.20264	0.974143	207|1545|4842|4843|7099	AKT1|CYP1B1|NOS1|NOS2|TLR4	-4.81087	-8.50307	44.301
GO:0048714	GO Biological Processes	19	positive regulation of oligodendrocyte differentiation	-5.96481	26.5806	11.1411	30169	25	227	5	2.20264	0.974143	2475|3065|3066|6469|7852	MTOR|HDAC1|HDAC2|SHH|CXCR4	-4.81087	-18.317	26.5806
GO:0050482	GO Biological Processes	19	arachidonic acid secretion	-5.96481	26.5806	11.1411	30169	25	227	5	2.20264	0.974143	624|1636|5319|5320|8399	BDKRB2|ACE|PLA2G1B|PLA2G2A|PLA2G10	-4.81087	-15.1054	31.0107
GO:1903963	GO Biological Processes	19	arachidonate transport	-5.96481	26.5806	11.1411	30169	25	227	5	2.20264	0.974143	624|1636|5319|5320|8399	BDKRB2|ACE|PLA2G1B|PLA2G2A|PLA2G10	-4.81087	-15.1054	31.0107
GO:0043255	GO Biological Processes	19	regulation of carbohydrate biosynthetic process	-5.93237	10.3226	8.25206	30169	103	227	8	3.52423	1.22385	207|2033|2185|2645|2908|2932|4790|23411	AKT1|EP300|PTK2B|GCK|NR3C1|GSK3B|NFKB1|SIRT1	-4.77963	-11.9947	30.2052
GO:0045639	GO Biological Processes	19	positive regulation of myeloid cell differentiation	-5.93237	10.3226	8.25206	30169	103	227	8	3.52423	1.22385	841|1432|3091|3123|6772|6774|6777|7124	CASP8|MAPK14|HIF1A|HLA-DRB1|STAT1|STAT3|STAT5B|TNF	-4.77963	-7.04029	19.5446
GO:0046620	GO Biological Processes	19	regulation of organ growth	-5.93237	10.3226	8.25206	30169	103	227	8	3.52423	1.22385	207|983|1432|2247|2539|2735|7046|7048	AKT1|CDK1|MAPK14|FGF2|G6PD|GLI1|TGFBR1|TGFBR2	-4.77963	-12.9368	17.7204
GO:0014743	GO Biological Processes	19	regulation of muscle hypertrophy	-5.91708	12.9211	8.81796	30169	72	227	7	3.0837	1.14742	142|2539|3488|3572|5468|6548|7132	PARP1|G6PD|IGFBP5|IL6ST|PPARG|SLC9A1|TNFRSF1A	-4.76554	-6.1318	13.9898
GO:0045600	GO Biological Processes	19	positive regulation of fat cell differentiation	-5.91708	12.9211	8.81796	30169	72	227	7	3.0837	1.14742	207|1432|3356|5467|5468|5743|7494	AKT1|MAPK14|HTR2A|PPARD|PPARG|PTGS2|XBP1	-4.76554	-8.86959	30.6699
GO:1900076	GO Biological Processes	19	regulation of cellular response to insulin stimulus	-5.91708	12.9211	8.81796	30169	72	227	7	3.0837	1.14742	3553|5468|5781|6198|6714|9971|23411	IL1B|PPARG|PTPN11|RPS6KB1|SRC|NR1H4|SIRT1	-4.76554	-7.14366	66.4515
GO:0046006	GO Biological Processes	19	regulation of activated T cell proliferation	-5.90755	17.3352	9.65383	30169	46	227	6	2.64317	1.06471	383|836|3558|3718|6777|11035	ARG1|CASP3|IL2|JAK3|STAT5B|RIPK3	-4.75681	-8.93912	20.9847
GO:2000273	GO Biological Processes	19	positive regulation of signaling receptor activity	-5.90755	17.3352	9.65383	30169	46	227	6	2.64317	1.06471	134|3065|3066|3091|3688|3717	ADORA1|HDAC1|HDAC2|HIF1A|ITGB1|JAK2	-4.75681	-10.1381	17.3352
GO:0030198	GO Biological Processes	19	extracellular matrix organization	-5.89346	5.82057	6.97944	30169	274	227	12	5.28634	1.48515	1545|1991|3688|4313|4314|4316|4318|4323|5156|5644|7046|7124	CYP1B1|ELANE|ITGB1|MMP2|MMP3|MMP7|MMP9|MMP14|PDGFRA|PRSS1|TGFBR1|TNF	-4.74312	-7.66463	20.2244
GO:0043062	GO Biological Processes	19	extracellular structure organization	-5.87694	5.79941	6.96158	30169	275	227	12	5.28634	1.48515	1545|1991|3688|4313|4314|4316|4318|4323|5156|5644|7046|7124	CYP1B1|ELANE|ITGB1|MMP2|MMP3|MMP7|MMP9|MMP14|PDGFRA|PRSS1|TGFBR1|TNF	-4.727	-7.66463	20.2244
GO:1903578	GO Biological Processes	19	regulation of ATP metabolic process	-5.87607	12.7441	8.74729	30169	73	227	7	3.0837	1.14742	142|2033|2475|2645|3091|3356|6774	PARP1|EP300|MTOR|GCK|HIF1A|HTR2A|STAT3	-4.72676	-10.5072	18.9862
GO:0002726	GO Biological Processes	19	positive regulation of T cell cytokine production	-5.87472	25.5583	10.9078	30169	26	227	5	2.20264	0.974143	3105|3553|3569|10892|114548	HLA-A|IL1B|IL6|MALT1|NLRP3	-4.72676	-28.2991	25.5583
GO:0035994	GO Biological Processes	19	response to muscle stretch	-5.87472	25.5583	10.9078	30169	26	227	5	2.20264	0.974143	1432|4790|5290|5747|6548	MAPK14|NFKB1|PIK3CA|PTK2|SLC9A1	-4.72676	-5.87472	25.5583
GO:0036119	GO Biological Processes	19	response to platelet-derived growth factor	-5.87472	25.5583	10.9078	30169	26	227	5	2.20264	0.974143	890|3065|5159|6714|7099	CCNA2|HDAC1|PDGFRB|SRC|TLR4	-4.72676	-12.9593	27.6881
GO:2001057	GO Biological Processes	19	reactive nitrogen species metabolic process	-5.87472	25.5583	10.9078	30169	26	227	5	2.20264	0.974143	207|1545|4842|4843|7099	AKT1|CYP1B1|NOS1|NOS2|TLR4	-4.72676	-8.50307	44.301
GO:1990748	GO Biological Processes	19	cellular detoxification	-5.86879	10.1259	8.15634	30169	105	227	8	3.52423	1.22385	2168|2950|4353|5742|5743|9429|10327|57016	FABP1|GSTP1|MPO|PTGS1|PTGS2|ABCG2|AKR1A1|AKR1B10	-4.72122	-13.8981	11.0753
GO:0032990	GO Biological Processes	19	cell part morphogenesis	-5.86546	4.26998	6.40677	30169	498	227	16	7.04846	1.69888	596|598|1909|2064|3320|3480|3688|5747|5781|5879|5979|6446|6469|6790|7422|8399	BCL2|BCL2L1|EDNRA|ERBB2|HSP90AA1|IGF1R|ITGB1|PTK2|PTPN11|RAC1|RET|SGK1|SHH|AURKA|VEGFA|PLA2G10	-4.71828	-12.238	7.3835
GO:0045930	GO Biological Processes	19	negative regulation of mitotic cell cycle	-5.85475	6.41199	7.14228	30169	228	227	11	4.84581	1.42523	25|472|595|596|983|1017|2146|4193|5347|7124|11200	ABL1|ATM|CCND1|BCL2|CDK1|CDK2|EZH2|MDM2|PLK1|TNF|CHEK2	-4.70798	-10.5861	22.9143
GO:0002861	GO Biological Processes	19	regulation of inflammatory response to antigenic stimulus	-5.85096	16.9664	9.53803	30169	47	227	6	2.64317	1.06471	1432|3123|6714|6850|7124|64127	MAPK14|HLA-DRB1|SRC|SYK|TNF|NOD2	-4.70576	-16.2489	24.1642
GO:0006110	GO Biological Processes	19	regulation of glycolytic process	-5.85096	16.9664	9.53803	30169	47	227	6	2.64317	1.06471	2033|2475|2645|3091|3356|6774	EP300|MTOR|GCK|HIF1A|HTR2A|STAT3	-4.70576	-10.5072	18.9862
GO:0032369	GO Biological Processes	19	negative regulation of lipid transport	-5.85096	16.9664	9.53803	30169	47	227	6	2.64317	1.06471	207|3685|4790|5781|6469|8399	AKT1|ITGAV|NFKB1|PTPN11|SHH|PLA2G10	-4.70576	-14.3686	30.2052
GO:0045601	GO Biological Processes	19	regulation of endothelial cell differentiation	-5.85096	16.9664	9.53803	30169	47	227	6	2.64317	1.06471	3551|3553|7124|7132|7422|7498	IKBKB|IL1B|TNF|TNFRSF1A|VEGFA|XDH	-4.70576	-11.6147	75.9446
GO:0045229	GO Biological Processes	19	external encapsulating structure organization	-5.84412	5.75753	6.92612	30169	277	227	12	5.28634	1.48515	1545|1991|3688|4313|4314|4316|4318|4323|5156|5644|7046|7124	CYP1B1|ELANE|ITGB1|MMP2|MMP3|MMP7|MMP9|MMP14|PDGFRA|PRSS1|TGFBR1|TNF	-4.69931	-7.66463	20.2244
GO:0002295	GO Biological Processes	19	T-helper cell lineage commitment	-5.83158	44.301	13.0629	30169	12	227	4	1.76211	0.87326	2475|3569|6774|6778	MTOR|IL6|STAT3|STAT6	-4.68834	-11.4424	51.6845
GO:0007252	GO Biological Processes	19	I-kappaB phosphorylation	-5.83158	44.301	13.0629	30169	12	227	4	1.76211	0.87326	1147|3551|7099|54106	CHUK|IKBKB|TLR4|TLR9	-4.68834	-11.5766	51.6845
GO:0043276	GO Biological Processes	19	anoikis	-5.83158	44.301	13.0629	30169	12	227	4	1.76211	0.87326	207|2475|5290|8517	AKT1|MTOR|PIK3CA|IKBKG	-4.68834	-10.1714	44.301
GO:1904177	GO Biological Processes	19	regulation of adipose tissue development	-5.83158	44.301	13.0629	30169	12	227	4	1.76211	0.87326	5468|9971|23411|51738	PPARG|NR1H4|SIRT1|GHRL	-4.68834	-7.14366	66.4515
GO:0110053	GO Biological Processes	19	regulation of actin filament organization	-5.82781	5.73682	6.90852	30169	278	227	12	5.28634	1.48515	25|673|2185|2475|4233|5290|5295|5734|5879|6548|6869|7046	ABL1|BRAF|PTK2B|MTOR|MET|PIK3CA|PIK3R1|PTGER4|RAC1|SLC9A1|TACR1|TGFBR1	-4.68497	-13.9473	22.9143
GO:0030001	GO Biological Processes	19	metal ion transport	-5.82273	3.80932	6.19462	30169	628	227	18	7.92952	1.79337	479|596|1017|1234|1909|1910|2149|2247|2645|3356|3685|4988|6446|6523|6524|6548|6555|7421	ATP12A|BCL2|CDK2|CCR5|EDNRA|EDNRB|F2R|FGF2|GCK|HTR2A|ITGAV|OPRM1|SGK1|SLC5A1|SLC5A2|SLC9A1|SLC10A2|VDR	-4.68028	-5.82273	10.4238
GO:0010717	GO Biological Processes	19	regulation of epithelial to mesenchymal transition	-5.80655	9.93668	8.06315	30169	107	227	8	3.52423	1.22385	2146|2475|3066|3553|3569|5747|7046|7048	EZH2|MTOR|HDAC2|IL1B|IL6|PTK2|TGFBR1|TGFBR2	-4.66449	-8.02442	18.9862
GO:0002286	GO Biological Processes	19	T cell activation involved in immune response	-5.79589	12.4043	8.61003	30169	75	227	7	3.0837	1.14742	2475|3383|3569|5734|6097|6774|6778	MTOR|ICAM1|IL6|PTGER4|RORC|STAT3|STAT6	-4.65674	-11.4424	51.6845
GO:0016239	GO Biological Processes	19	positive regulation of macroautophagy	-5.79589	12.4043	8.61003	30169	75	227	7	3.0837	1.14742	3091|3791|5595|8517|10392|23411|64127	HIF1A|KDR|MAPK3|IKBKG|NOD1|SIRT1|NOD2	-4.65674	-18.0996	12.4043
GO:0050810	GO Biological Processes	19	regulation of steroid biosynthetic process	-5.79589	12.4043	8.61003	30169	75	227	7	3.0837	1.14742	2246|2908|3480|4790|7124|9971|23411	FGF1|NR3C1|IGF1R|NFKB1|TNF|NR1H4|SIRT1	-4.65674	-8.25552	21.2645
GO:0032660	GO Biological Processes	19	regulation of interleukin-17 production	-5.79569	16.6129	9.42573	30169	48	227	6	2.64317	1.06471	3558|3569|3717|7099|9971|64127	IL2|IL6|JAK2|TLR4|NR1H4|NOD2	-4.65674	-11.5766	51.6845
GO:0042220	GO Biological Processes	19	response to cocaine	-5.79569	16.6129	9.42573	30169	48	227	6	2.64317	1.06471	890|2185|3066|3320|3356|4988	CCNA2|PTK2B|HDAC2|HSP90AA1|HTR2A|OPRM1	-4.65674	-8.38284	44.301
GO:0045981	GO Biological Processes	19	positive regulation of nucleotide metabolic process	-5.79569	16.6129	9.42573	30169	48	227	6	2.64317	1.06471	136|2475|3091|3356|4842|4843	ADORA2B|MTOR|HIF1A|HTR2A|NOS1|NOS2	-4.65674	-10.5072	18.9862
GO:0048546	GO Biological Processes	19	digestive tract morphogenesis	-5.79569	16.6129	9.42573	30169	48	227	6	2.64317	1.06471	596|1956|2735|3091|5156|6469	BCL2|EGFR|GLI1|HIF1A|PDGFRA|SHH	-4.65674	-17.1338	20.1368
GO:1900544	GO Biological Processes	19	positive regulation of purine nucleotide metabolic process	-5.79569	16.6129	9.42573	30169	48	227	6	2.64317	1.06471	136|2475|3091|3356|4842|4843	ADORA2B|MTOR|HIF1A|HTR2A|NOS1|NOS2	-4.65674	-10.5072	18.9862
GO:0097435	GO Biological Processes	19	supramolecular fiber organization	-5.79	3.98475	6.24719	30169	567	227	17	7.48899	1.74701	25|596|673|1545|2185|3688|3717|4193|5156|5159|5319|5879|6469|6714|7046|11035|51738	ABL1|BCL2|BRAF|CYP1B1|PTK2B|ITGB1|JAK2|MDM2|PDGFRA|PDGFRB|PLA2G1B|RAC1|SHH|SRC|TGFBR1|RIPK3|GHRL	-4.65143	-8.50769	16.04
GO:0001945	GO Biological Processes	19	lymph vessel development	-5.78844	24.6117	10.6873	30169	27	227	5	2.20264	0.974143	2247|3791|3964|6850|7422	FGF2|KDR|LGALS8|SYK|VEGFA	-4.65143	-18.7692	49.8387
GO:0032740	GO Biological Processes	19	positive regulation of interleukin-17 production	-5.78844	24.6117	10.6873	30169	27	227	5	2.20264	0.974143	3558|3569|3717|9971|64127	IL2|IL6|JAK2|NR1H4|NOD2	-4.65143	-11.5766	51.6845
GO:0071549	GO Biological Processes	19	cellular response to dexamethasone stimulus	-5.78844	24.6117	10.6873	30169	27	227	5	2.20264	0.974143	383|2908|3480|3717|6198	ARG1|NR3C1|IGF1R|JAK2|RPS6KB1	-4.65143	-21.1405	24.7262
GO:1905564	GO Biological Processes	19	positive regulation of vascular endothelial cell proliferation	-5.78844	24.6117	10.6873	30169	27	227	5	2.20264	0.974143	2247|2260|5170|6774|51738	FGF2|FGFR1|PDPK1|STAT3|GHRL	-4.65143	-8.88999	39.8709
GO:0045089	GO Biological Processes	19	positive regulation of innate immune response	-5.78295	8.24916	7.61874	30169	145	227	9	3.96476	1.29512	2033|3320|3551|6714|6777|6850|7099|54106|64127	EP300|HSP90AA1|IKBKB|SRC|STAT5B|SYK|TLR4|TLR9|NOD2	-4.64632	-16.2489	24.1642
GO:0090170	GO Biological Processes	19	regulation of Golgi inheritance	-5.77669	99.6773	17.1847	30169	4	227	3	1.32159	0.757959	5594|5595|5604	MAPK1|MAPK3|MAP2K1	-4.64045	-10.119	99.6773
GO:0006897	GO Biological Processes	19	endocytosis	-5.77602	4.20247	6.32555	30169	506	227	16	7.04846	1.69888	25|598|949|1803|3265|3576|3577|3579|3688|5594|5595|5879|6469|6850|7048|57007	ABL1|BCL2L1|SCARB1|DPP4|HRAS|CXCL8|CXCR1|CXCR2|ITGB1|MAPK1|MAPK3|RAC1|SHH|SYK|TGFBR2|ACKR3	-4.64045	-29.6709	15.1889
GO:0032526	GO Biological Processes	19	response to retinoic acid	-5.77592	9.84467	8.01748	30169	108	227	8	3.52423	1.22385	472|2185|2932|3066|4313|5159|5979|7124	ATM|PTK2B|GSK3B|HDAC2|MMP2|PDGFRB|RET|TNF	-4.64045	-5.77592	49.8387
GO:0060420	GO Biological Processes	19	regulation of heart growth	-5.75669	12.2411	8.54334	30169	76	227	7	3.0837	1.14742	983|1432|2247|2539|2735|7046|7048	CDK1|MAPK14|FGF2|G6PD|GLI1|TGFBR1|TGFBR2	-4.6216	-12.9368	17.7204
GO:0061178	GO Biological Processes	19	regulation of insulin secretion involved in cellular response to glucose stimulus	-5.74169	16.2738	9.31676	30169	49	227	6	2.64317	1.06471	1080|3091|3123|5467|9971|51738	CFTR|HIF1A|HLA-DRB1|PPARD|NR1H4|GHRL	-4.60698	-26.71	29.534
GO:0030111	GO Biological Processes	19	regulation of Wnt signaling pathway	-5.73727	5.14208	6.64792	30169	336	227	13	5.72687	1.5422	25|331|1432|1956|2247|2735|2932|3065|3487|4790|6469|6714|7015	ABL1|XIAP|MAPK14|EGFR|FGF2|GLI1|GSK3B|HDAC1|IGFBP4|NFKB1|SHH|SRC|TERT	-4.60295	-5.73727	7.3835
GO:0001942	GO Biological Processes	19	hair follicle development	-5.71807	12.0821	8.47789	30169	77	227	7	3.0837	1.14742	596|1956|3065|3066|3488|6469|8399	BCL2|EGFR|HDAC1|HDAC2|IGFBP5|SHH|PLA2G10	-4.58413	-6.27261	19.9355
GO:0003015	GO Biological Processes	19	heart process	-5.71562	9.66568	7.92789	30169	110	227	8	3.52423	1.22385	1636|1909|2475|2548|5290|6548|6714|7852	ACE|EDNRA|MTOR|GAA|PIK3CA|SLC9A1|SRC|CXCR4	-4.58206	-6.83419	17.7204
GO:0002052	GO Biological Processes	19	positive regulation of neuroblast proliferation	-5.70568	23.7327	10.4784	30169	28	227	5	2.20264	0.974143	2247|3091|3688|6469|7422	FGF2|HIF1A|ITGB1|SHH|VEGFA	-4.57555	-14.6196	49.8387
GO:0010758	GO Biological Processes	19	regulation of macrophage chemotaxis	-5.70568	23.7327	10.4784	30169	28	227	5	2.20264	0.974143	2185|4282|5594|5595|5747	PTK2B|MIF|MAPK1|MAPK3|PTK2	-4.57555	-10.119	99.6773
GO:0010971	GO Biological Processes	19	positive regulation of G2/M transition of mitotic cell cycle	-5.70568	23.7327	10.4784	30169	28	227	5	2.20264	0.974143	595|891|983|1019|23476	CCND1|CCNB1|CDK1|CDK4|BRD4	-4.57555	-15.1858	23.7327
GO:0030194	GO Biological Processes	19	positive regulation of blood coagulation	-5.70568	23.7327	10.4784	30169	28	227	5	2.20264	0.974143	2147|2149|2152|5054|10855	F2|F2R|F3|SERPINE1|HPSE	-4.57555	-16.1767	25.7232
GO:0032104	GO Biological Processes	19	regulation of response to extracellular stimulus	-5.70568	23.7327	10.4784	30169	28	227	5	2.20264	0.974143	596|4988|7421|9971|51738	BCL2|OPRM1|VDR|NR1H4|GHRL	-4.57555	-5.70568	79.7419
GO:0032107	GO Biological Processes	19	regulation of response to nutrient levels	-5.70568	23.7327	10.4784	30169	28	227	5	2.20264	0.974143	596|4988|7421|9971|51738	BCL2|OPRM1|VDR|NR1H4|GHRL	-4.57555	-5.70568	79.7419
GO:0070293	GO Biological Processes	19	renal absorption	-5.70568	23.7327	10.4784	30169	28	227	5	2.20264	0.974143	1909|1910|6446|6523|6524	EDNRA|EDNRB|SGK1|SLC5A1|SLC5A2	-4.57555	-8.86963	39.8709
GO:1900048	GO Biological Processes	19	positive regulation of hemostasis	-5.70568	23.7327	10.4784	30169	28	227	5	2.20264	0.974143	2147|2149|2152|5054|10855	F2|F2R|F3|SERPINE1|HPSE	-4.57555	-16.1767	25.7232
GO:1903959	GO Biological Processes	19	regulation of anion transmembrane transport	-5.70568	23.7327	10.4784	30169	28	227	5	2.20264	0.974143	383|1080|3688|5243|7124	ARG1|CFTR|ITGB1|ABCB1|TNF	-4.57555	-6.7309	30.6699
GO:0045737	GO Biological Processes	19	positive regulation of cyclin-dependent protein serine/threonine kinase activity	-5.6889	15.9484	9.21095	30169	50	227	6	2.64317	1.06471	207|595|891|894|1956|6714	AKT1|CCND1|CCNB1|CCND2|EGFR|SRC	-4.55953	-15.1858	23.7327
GO:0060043	GO Biological Processes	19	regulation of cardiac muscle cell proliferation	-5.6889	15.9484	9.21095	30169	50	227	6	2.64317	1.06471	983|1432|2247|2735|7046|7048	CDK1|MAPK14|FGF2|GLI1|TGFBR1|TGFBR2	-4.55953	-12.9368	17.7204
GO:0044773	GO Biological Processes	19	mitotic DNA damage checkpoint signaling	-5.67999	11.9272	8.41363	30169	78	227	7	3.0837	1.14742	472|595|983|1017|4193|5347|11200	ATM|CCND1|CDK1|CDK2|MDM2|PLK1|CHEK2	-4.55101	-10.5861	22.9143
GO:0033690	GO Biological Processes	19	positive regulation of osteoblast proliferation	-5.67445	40.8933	12.5265	30169	13	227	4	1.76211	0.87326	25|3480|3685|10855	ABL1|IGF1R|ITGAV|HPSE	-4.54622	-5.67445	40.8933
GO:0043568	GO Biological Processes	19	positive regulation of insulin-like growth factor receptor signaling pathway	-5.67445	40.8933	12.5265	30169	13	227	4	1.76211	0.87326	367|3486|3487|3488	AR|IGFBP3|IGFBP4|IGFBP5	-4.54622	-5.67445	40.8933
[truncated: 1,330 more rows]

## Sheet: KEGG Pathway
GO	Category	CategoryID	Description	LogP	Enrichment	Z-score	#TotalGeneInLibrary	#GeneInGO	#GeneInHitList	#GeneInGOAndHitList	%InGO	STDV %InGO	GeneID	Hits	Log(q-value)	BestLogPInGroup	BestEnrichmentInGroup
[truncated: 211 more rows]
